# Supplementary material for: Characterisation of gas cell reactions for 70+ elements using N2O for ICP tandem mass spectrometry measurements
Source: Royal Society of Chemistry journal article supplement (doi:10.1039/d3ja00025g), 2023-01-01
Supplement: d3ja00025g1.pdf [file d3ja00025g1.pdf]

Supplementary information to

**Characterisation of gas cell reactions for 70+ elements using N<sub>2</sub>O for ICP tandem mass spectrometry measurements**

Shaun T. Lancaster<sup>a\*</sup>, Thomas Prohaska<sup>a,b</sup> and Johanna Irrgeher<sup>a,b</sup>

<sup>a</sup>Department of General, Analytical and Physical Chemistry, Chair of General and Analytical Chemistry, Montanuniversität Leoben, Leoben, Austria.

<sup>b</sup>Department of Physics and Astronomy, University of Calgary, Calgary, Canada.

Table S1: Composition of multi-element standards used for evaluation of on-mass and mass-shift determinations. Measured analytes in each standard are highlighted in bold. Elements measured as single element standard solutions are given in italics.

| Standard                               | Matrix                  | Analytes                                                                                                                                    |
|----------------------------------------|-------------------------|---------------------------------------------------------------------------------------------------------------------------------------------|
| ICP multi-element standard solution VI | w = 2% HNO <sub>3</sub> | Li, <b>Be, B</b> , Na, Mg, Al, K, Ca, V, <b>Cr</b> , Mn, Fe, Co, Ni, Cu, Zn, Ga, <b>As</b> , Se, Rb, Sr, Mo, Ag, Cd, Ba, <b>Pb, Bi</b> , U. |
| AHF-CAL-7                              | w = 2% HNO <sub>3</sub> | <b>Y, La, Ce, Pr, Nd, Sm</b> , Eu, Gd, Tb, Dy, Ho, Er, Tm, Yb, Lu, <b>Th, U</b> .                                                           |
| Precious Metals                        | w = 2% HNO <sub>3</sub> | <b>Ru, Rh, Pd, Ir, Pt, Au</b> .                                                                                                             |
| In-house A                             | w = 2% HNO <sub>3</sub> | <b>Sc, Ti, Ge, Re, W</b> .                                                                                                                  |
| In-house B                             | w = 2% HNO <sub>3</sub> | <b>Nb, Sn, Sb, Ta</b> .                                                                                                                     |
| In-house C                             | w = 2% HNO <sub>3</sub> | <b>Al, Ca, V, Ni, Cu, Se, Cd, Ba</b> .                                                                                                      |
| In-house D                             | w = 2% HNO <sub>3</sub> | <b>Mg, Mn, Fe, Zn, Sr, Mo, Te</b> .                                                                                                         |
| In-house E                             | w = 2% HNO <sub>3</sub> | <b>Gd, Tb, Dy, Ho, Er, Tm</b> .                                                                                                             |
| In-house F                             | w = 2% HNO <sub>3</sub> | <b>Yb, Lu</b> .                                                                                                                             |
| In-house G                             | w = 2% HNO <sub>3</sub> | <b>Li, K, Ga, Ag, Cs, Tl</b> .                                                                                                              |
| In-house H                             | w = 2% HNO <sub>3</sub> | <b>Na, Rb</b> .                                                                                                                             |
| In-house I                             | w = 2% HNO <sub>3</sub> | <b>S, P, Zr</b> .                                                                                                                           |
| In-house J                             | w = 2% HCl              | <b>Hf, Os, Hg</b> .                                                                                                                         |
| In-house K                             | w = 1% TMAH             | <b>Cl, Br, I</b> .                                                                                                                          |
| In-house L                             | w = 2% HNO <sub>3</sub> | <b>Co, In</b>                                                                                                                               |
| <i>Single Element</i>                  | w = 2% HNO <sub>3</sub> | <i><b>Si</b></i>                                                                                                                            |

Table S1b: Composition of multi-element standards used for evaluation of on-mass removal of doubly-charged and oxide-based interferences. Analytes measured in each standard are highlighted in bold. Elements measured as single element standard solutions are given in italics.

| Standard              | Matrix                  | Analytes                                                                  |
|-----------------------|-------------------------|---------------------------------------------------------------------------|
| AHF-CAL-7             | w = 2% HNO <sub>3</sub> | Y, La, Ce, Pr, Nd, Sm, Eu, Gd, Tb, Dy, Ho, Er, Tm, Yb, Lu, <b>Th, U</b> . |
| In-house G            | w = 2% HNO <sub>3</sub> | <b>Li, K, Ga, Ag, Cs, Tl</b> .                                            |
| In-house K            | w = 1% TMAH             | <b>Cl, Br, I</b> .                                                        |
| In-house L            | w = 2% HNO <sub>3</sub> | <b>Co, In</b>                                                             |
| In-house M            | w = 2% HNO <sub>3</sub> | <b>Y, La, Pr, Tb, Ho, Tm</b>                                              |
| In-house N            | w = 2% HNO <sub>3</sub> | <b>Ca, V, Sb, Sm, Lu, Pb</b>                                              |
| In-house O            | w = 2% HNO <sub>3</sub> | <b>Sc, Nb, Ce, Eu, Yb, Ta</b>                                             |
| In-house P            | w = 2% HNO <sub>3</sub> | <b>Na, Cu, Rb, Sn, Nd, Bi</b>                                             |
| In-house Q            | w = 2% HNO <sub>3</sub> | <b>Fe, Rh, Te, Er, Au</b>                                                 |
| In-house R            | w = 2% HNO <sub>3</sub> | <b>Mg, Mn, Ba, Dy, Pt</b>                                                 |
| In-house S            | w = 2% HNO <sub>3</sub> | <b>Ti, Sr, Cd, Gd, Re</b>                                                 |
| In-house T            | w = 2% HNO <sub>3</sub> | <b>Cr, Ni, Zr</b>                                                         |
| In-house U            | w = 2% HNO <sub>3</sub> | <b>Zn, Mo</b>                                                             |
| <i>Single Element</i> | w = 2% HNO <sub>3</sub> | <i><b>Be, B, Al, Si, P, S, Ge, As, Se</b></i>                             |
| <i>Single Element</i> | w = 2% HCl              | <i><b>Ru, Pd, Hf, W, Os, Ir, Hg</b></i>                                   |

Table S2: Maximum obtained formation of selected product ions for 73 analytes using N<sub>2</sub>O reaction gas. Flow rates of N<sub>2</sub>O provided are at the optimum formation using a Perkin Elmer NexION 5000.

| Element | Isotope | MN <sup>+</sup> (+14 amu) |                                   | MO <sup>+</sup> (+16 amu) |                                   | MNO <sup>+</sup> (+30 amu) |                                   | MO <sub>2</sub> <sup>+</sup> (+32 amu) |                                   | MN <sub>2</sub> O <sup>+</sup> (+44 amu) |                                   | MNO <sub>2</sub> <sup>+</sup> (+46 amu) |                                   |
|---------|---------|---------------------------|-----------------------------------|---------------------------|-----------------------------------|----------------------------|-----------------------------------|----------------------------------------|-----------------------------------|------------------------------------------|-----------------------------------|-----------------------------------------|-----------------------------------|
|         |         | Formation (%)             | Flow Rate (mL min <sup>-1</sup> ) | Formation (%)             | Flow Rate (mL min <sup>-1</sup> ) | Formation (%)              | Flow Rate (mL min <sup>-1</sup> ) | Formation (%)                          | Flow Rate (mL min <sup>-1</sup> ) | Formation (%)                            | Flow Rate (mL min <sup>-1</sup> ) | Formation (%)                           | Flow Rate (mL min <sup>-1</sup> ) |
| Li      | 7       | <0.01                     | -                                 | <0.01                     | -                                 | <0.01                      | -                                 | <0.01                                  | -                                 | <0.01                                    | -                                 | <0.01                                   | -                                 |
| Be      | 9       | 0.03                      | 0.1                               | 5.5                       | 0.1                               | 0.02                       | 0.1                               | 7.8                                    | 0.3                               | 0.07                                     | 0.2                               | <0.01                                   | -                                 |
| B       | 11      | <0.01                     | -                                 | 0.98                      | 0.1                               | <0.01                      | -                                 | 0.14                                   | 0.1                               | 0.01                                     | 0.1                               | <0.01                                   | -                                 |
| Na      | 23      | <0.01                     | -                                 | <0.01                     | -                                 | <0.01                      | -                                 | <0.01                                  | -                                 | <0.01                                    | -                                 | <0.01                                   | -                                 |
| Mg      | 24      | <0.01                     | -                                 | 13                        | 0.5                               | <0.01                      | -                                 | <0.01                                  | -                                 | 0.06                                     | 0.5                               | <0.01                                   | -                                 |
| Al      | 27      | <0.01                     | -                                 | 1.5                       | 0.1                               | <0.01                      | -                                 | 0.48                                   | 0.2                               | 0.06                                     | 0.6                               | <0.01                                   | -                                 |
| Si      | 29      | 0.47                      | 0.1                               | 29                        | 0.2                               | 0.20                       | 0.3                               | 11                                     | 0.3                               | 0.05                                     | 0.3                               | <0.01                                   | -                                 |
| P       | 31      | 5.2                       | 0.1                               | 28                        | 0.4                               | 0.09                       | 0.4                               | 0.01                                   | 0.2                               | <0.01                                    | -                                 | <0.01                                   | -                                 |
| S       | 34      | 12                        | 0.5                               | 11                        | 0.4                               | 0.02                       | 0.5                               | 5.9                                    | 0.7                               | <0.01                                    | -                                 | <0.01                                   | -                                 |
| Cl      | 35      | 0.06                      | 0.1                               | 0.69                      | 0.2                               | <0.01                      | -                                 | <0.01                                  | -                                 | <0.01                                    | -                                 | <0.01                                   | -                                 |
| K       | 39      | <0.01                     | -                                 | <0.01                     | -                                 | <0.01                      | -                                 | <0.01                                  | -                                 | <0.01                                    | -                                 | <0.01                                   | -                                 |
| Ca      | 44      | <0.01                     | -                                 | 51                        | 0.4                               | 0.09                       | 0.4                               | 0.02                                   | 0.6                               | <0.01                                    | -                                 | <0.01                                   | -                                 |
| Sc      | 45      | 0.57                      | 0.3                               | 67                        | 0.4                               | 0.10                       | 0.3                               | 0.28                                   | 0.5                               | <0.01                                    | -                                 | <0.01                                   | -                                 |
| Ti      | 47      | 2.6                       | 0.4                               | 37                        | 0.3                               | 0.07                       | 0.3                               | 29                                     | 0.6                               | <0.01                                    | -                                 | <0.01                                   | -                                 |
| V       | 51      | 0.52                      | 0.5                               | 25                        | 0.4                               | 0.12                       | 0.3                               | 17                                     | 0.5                               | <0.01                                    | -                                 | <0.01                                   | -                                 |
| Cr      | 52      | 0.09                      | 0.4                               | 1.9                       | 0.4                               | <0.01                      | -                                 | 0.82                                   | 0.5                               | 0.06                                     | 0.5                               | <0.01                                   | -                                 |
| Mn      | 55      | <0.01                     | -                                 | 6.6                       | 0.4                               | <0.01                      | -                                 | <0.01                                  | -                                 | 0.02                                     | 1.8                               | <0.01                                   | -                                 |
| Fe      | 57      | 0.02                      | 0.4                               | 42                        | 0.7                               | <0.01                      | -                                 | 0.09                                   | 0.4                               | <0.01                                    | -                                 | <0.01                                   | -                                 |
| Co      | 59      | 0.01                      | 0.4                               | 9.4                       | 0.5                               | 0.02                       | 0.4                               | <0.01                                  | -                                 | 0.09                                     | 0.3                               | <0.01                                   | -                                 |
| Ni      | 60      | <0.01                     | -                                 | 3.4                       | 0.4                               | <0.01                      | -                                 | <0.01                                  | -                                 | 0.20                                     | 0.4                               | <0.01                                   | -                                 |
| Cu      | 63      | <0.01                     | -                                 | 0.15                      | 0.2                               | <0.01                      | -                                 | <0.01                                  | -                                 | 0.89                                     | 0.5                               | <0.01                                   | -                                 |
| Zn      | 66      | <0.01                     | -                                 | 1.6                       | 0.4                               | <0.01                      | -                                 | <0.01                                  | -                                 | 0.07                                     | 1.8                               | <0.01                                   | -                                 |
| Ga      | 69      | <0.01                     | -                                 | <0.01                     | -                                 | <0.01                      | -                                 | <0.01                                  | -                                 | <0.01                                    | -                                 | <0.01                                   | -                                 |
| Ge      | 74      | 0.08                      | 0.5                               | 68                        | 0.4                               | 0.02                       | 0.4                               | 0.03                                   | 0.5                               | <0.01                                    | -                                 | <0.01                                   | -                                 |
| As      | 75      | 0.39                      | 0.1                               | 37                        | 0.4                               | <0.01                      | -                                 | 0.08                                   | 0.5                               | 0.03                                     | 0.5                               | <0.01                                   | -                                 |
| Se      | 82      | 3.0                       | 0.6                               | 11                        | 1.3                               | <0.01                      | -                                 | 0.18                                   | 0.7                               | <0.01                                    | -                                 | <0.01                                   | -                                 |
| Br      | 81      | 0.24                      | 0.4                               | 57                        | 0.5                               | <0.01                      | -                                 | <0.01                                  | -                                 | 0.07                                     | 0.5                               | <0.01                                   | -                                 |
| Rb      | 85      | <0.01                     | -                                 | <0.01                     | -                                 | <0.01                      | -                                 | <0.01                                  | -                                 | <0.01                                    | -                                 | <0.01                                   | -                                 |
| Sr      | 88      | <0.01                     | -                                 | 56                        | 0.5                               | 0.12                       | 0.5                               | <0.01                                  | -                                 | <0.01                                    | -                                 | <0.01                                   | -                                 |
| Y       | 89      | 1.7                       | 0.4                               | 54                        | 0.4                               | 0.04                       | 0.2                               | 0.39                                   | 0.5                               | <0.01                                    | -                                 | <0.01                                   | -                                 |
| Zr      | 90      | 16                        | 0.4                               | 20                        | 0.1                               | 0.47                       | 0.3                               | 43                                     | 0.5                               | <0.01                                    | -                                 | 0.03                                    | 0.6                               |
| Nb      | 93      | 8.1                       | 0.2                               | 16                        | 0.1                               | 12                         | 0.5                               | 38                                     | 0.5                               | <0.01                                    | -                                 | <0.01                                   | -                                 |
| Mo      | 98      | 1.8                       | 0.5                               | 3.4                       | 0.1                               | 0.47                       | 0.5                               | 1.3                                    | 0.3                               | 0.07                                     | 1.7                               | <0.01                                   | -                                 |
| Ru      | 101     | 0.47                      | 0.7                               | 1.7                       | 0.2                               | 0.10                       | 0.7                               | 0.56                                   | 0.3                               | 0.09                                     | 1.3                               | <0.01                                   | -                                 |
| Rh      | 103     | 0.08                      | 0.6                               | 0.67                      | 0.6                               | 0.03                       | 0.7                               | <0.01                                  | -                                 | 0.11                                     | 1.6                               | <0.01                                   | -                                 |
| Pd      | 105     | <0.01                     | -                                 | 0.13                      | 0.6                               | <0.01                      | -                                 | <0.01                                  | -                                 | 0.09                                     | 1.0                               | <0.01                                   | -                                 |
| Ag      | 107     | <0.01                     | -                                 | <0.01                     | -                                 | <0.01                      | -                                 | <0.01                                  | -                                 | 0.11                                     | 1.7                               | <0.01                                   | -                                 |

(Table S2 continued)

| Element | Isotope | MO <sub>3</sub> <sup>+</sup> (+48 amu) |                                   | MN <sub>2</sub> O <sub>2</sub> <sup>+</sup> (+60 amu) |                                   | MO <sub>4</sub> <sup>+</sup> (+64 amu) |                                   | MN <sub>2</sub> O.O <sub>2</sub> (+76 amu) |                                   | MNO.O <sub>4</sub> (+94 amu) |                                   | M(N <sub>2</sub> O) <sub>2</sub> .O <sub>2</sub> |                                   |
|---------|---------|----------------------------------------|-----------------------------------|-------------------------------------------------------|-----------------------------------|----------------------------------------|-----------------------------------|--------------------------------------------|-----------------------------------|------------------------------|-----------------------------------|--------------------------------------------------|-----------------------------------|
|         |         | Formation (%)                          | Flow Rate (mL min <sup>-1</sup> ) | Formation (%)                                         | Flow Rate (mL min <sup>-1</sup> ) | Formation (%)                          | Flow Rate (mL min <sup>-1</sup> ) | Formation (%)                              | Flow Rate (mL min <sup>-1</sup> ) | Formation (%)                | Flow Rate (mL min <sup>-1</sup> ) | Formation (%)                                    | Flow Rate (mL min <sup>-1</sup> ) |
| Li      | 7       | <0.01                                  | -                                 | <0.01                                                 | -                                 | <0.01                                  | -                                 | <0.01                                      | -                                 | <0.01                        | -                                 | <0.01                                            | -                                 |
| Be      | 9       | 0.10                                   | 0.3                               | 2.7                                                   | 0.4                               | <0.01                                  | -                                 | 1.8                                        | 0.6                               | 0.04                         | 1.2                               | 0.12                                             | 0.9                               |
| B       | 11      | <0.01                                  | -                                 | 0.05                                                  | 0.4                               | <0.01                                  | -                                 | <0.01                                      | -                                 | <0.01                        | -                                 | <0.01                                            | -                                 |
| Na      | 23      | <0.01                                  | -                                 | <0.01                                                 | -                                 | <0.01                                  | -                                 | <0.01                                      | -                                 | <0.01                        | -                                 | <0.01                                            | -                                 |
| Mg      | 24      | <0.01                                  | -                                 | 0.26                                                  | 1.2                               | <0.01                                  | -                                 | <0.01                                      | -                                 | <0.01                        | -                                 | <0.01                                            | -                                 |
| Al      | 27      | 0.69                                   | 0.4                               | 0.04                                                  | 0.3                               | 0.06                                   | 0.6                               | 0.07                                       | 0.4                               | <0.01                        | -                                 | <0.01                                            | -                                 |
| Si      | 29      | 2.8                                    | 0.4                               | 0.62                                                  | 0.4                               | 0.03                                   | 0.4                               | 0.28                                       | 0.6                               | 0.08                         | 1.2                               | 0.05                                             | 1.0                               |
| P       | 31      | <0.01                                  | -                                 | <0.01                                                 | -                                 | <0.01                                  | -                                 | <0.01                                      | -                                 | <0.01                        | -                                 | <0.01                                            | -                                 |
| S       | 34      | <0.01                                  | -                                 | <0.01                                                 | -                                 | <0.01                                  | -                                 | <0.01                                      | -                                 | <0.01                        | -                                 | <0.01                                            | -                                 |
| Cl      | 35      | <0.01                                  | -                                 | <0.01                                                 | -                                 | <0.01                                  | -                                 | <0.01                                      | -                                 | <0.01                        | -                                 | <0.01                                            | -                                 |
| K       | 39      | <0.01                                  | -                                 | <0.01                                                 | -                                 | <0.01                                  | -                                 | <0.01                                      | -                                 | <0.01                        | -                                 | <0.01                                            | -                                 |
| Ca      | 44      | <0.01                                  | -                                 | 0.16                                                  | 1.3                               | <0.01                                  | -                                 | <0.01                                      | -                                 | <0.01                        | -                                 | <0.01                                            | -                                 |
| Sc      | 45      | <0.01                                  | -                                 | 0.32                                                  | 1.0                               | <0.01                                  | -                                 | <0.01                                      | -                                 | <0.01                        | -                                 | <0.01                                            | -                                 |
| Ti      | 47      | <0.01                                  | -                                 | 0.02                                                  | 0.3                               | <0.01                                  | -                                 | 1.8                                        | 0.8                               | 1.4                          | 1.3                               | 2.1                                              | 1.1                               |
| V       | 51      | <0.01                                  | -                                 | 0.11                                                  | 0.8                               | <0.01                                  | -                                 | 1.3                                        | 0.8                               | 1.2                          | 1.8                               | 2.4                                              | 1.3                               |
| Cr      | 52      | 0.59                                   | 0.7                               | 0.05                                                  | 0.7                               | <0.01                                  | -                                 | 0.08                                       | 0.8                               | 0.04                         | 1.4                               | 0.07                                             | 1.1                               |
| Mn      | 55      | <0.01                                  | -                                 | 0.19                                                  | 1.3                               | <0.01                                  | -                                 | <0.01                                      | -                                 | <0.01                        | -                                 | <0.01                                            | -                                 |
| Fe      | 57      | 0.14                                   | 0.7                               | 1.4                                                   | 1.0                               | <0.01                                  | -                                 | <0.01                                      | -                                 | <0.01                        | -                                 | <0.01                                            | -                                 |
| Co      | 59      | <0.01                                  | -                                 | 0.54                                                  | 1.3                               | <0.01                                  | -                                 | <0.01                                      | -                                 | <0.01                        | -                                 | <0.01                                            | -                                 |
| Ni      | 60      | <0.01                                  | -                                 | 0.14                                                  | 1.3                               | <0.01                                  | -                                 | <0.01                                      | -                                 | <0.01                        | -                                 | <0.01                                            | -                                 |
| Cu      | 63      | <0.01                                  | -                                 | <0.01                                                 | -                                 | <0.01                                  | -                                 | <0.01                                      | -                                 | <0.01                        | -                                 | <0.01                                            | -                                 |
| Zn      | 66      | <0.01                                  | -                                 | 0.10                                                  | 1.3                               | <0.01                                  | -                                 | <0.01                                      | -                                 | <0.01                        | -                                 | <0.01                                            | -                                 |
| Ga      | 69      | <0.01                                  | -                                 | <0.01                                                 | -                                 | <0.01                                  | -                                 | <0.01                                      | -                                 | <0.01                        | -                                 | <0.01                                            | -                                 |
| Ge      | 74      | 0.01                                   | 1.0                               | 0.19                                                  | 1.0                               | <0.01                                  | -                                 | <0.01                                      | -                                 | <0.01                        | -                                 | <0.01                                            | -                                 |
| As      | 75      | <0.01                                  | -                                 | 0.03                                                  | 0.5                               | <0.01                                  | -                                 | <0.01                                      | -                                 | <0.01                        | -                                 | <0.01                                            | -                                 |
| Se      | 82      | <0.01                                  | -                                 | 0.03                                                  | 2.0                               | <0.01                                  | -                                 | <0.01                                      | -                                 | <0.01                        | -                                 | <0.01                                            | -                                 |
| Br      | 81      | <0.01                                  | -                                 | <0.01                                                 | -                                 | <0.01                                  | -                                 | <0.01                                      | -                                 | <0.01                        | -                                 | <0.01                                            | -                                 |
| Rb      | 85      | <0.01                                  | -                                 | <0.01                                                 | -                                 | <0.01                                  | -                                 | <0.01                                      | -                                 | <0.01                        | -                                 | <0.01                                            | -                                 |
| Sr      | 88      | <0.01                                  | -                                 | 0.18                                                  | 1.6                               | <0.01                                  | -                                 | <0.01                                      | -                                 | <0.01                        | -                                 | <0.01                                            | -                                 |
| Y       | 89      | <0.01                                  | -                                 | 0.18                                                  | 1.2                               | <0.01                                  | -                                 | <0.01                                      | -                                 | <0.01                        | -                                 | <0.01                                            | -                                 |
| Zr      | 90      | 0.01                                   | 0.8                               | <0.01                                                 | -                                 | <0.01                                  | -                                 | 1.8                                        | 0.8                               | 1.4                          | 1.4                               | 1.4                                              | 1.1                               |
| Nb      | 93      | 0.39                                   | 0.5                               | <0.01                                                 | -                                 | <0.01                                  | -                                 | 2.0                                        | 0.9                               | 2.7                          | 1.3                               | 2.1                                              | 1.1                               |
| Mo      | 98      | 3.8                                    | 0.4                               | <0.01                                                 | -                                 | <0.01                                  | -                                 | <0.01                                      | -                                 | 0.03                         | 0.8                               | <0.01                                            | -                                 |
| Ru      | 101     | 2.1                                    | 0.5                               | <0.01                                                 | -                                 | 1.5                                    | 1.0                               | <0.01                                      | -                                 | <0.01                        | -                                 | <0.01                                            | -                                 |
| Rh      | 103     | <0.01                                  | -                                 | 0.01                                                  | 1.6                               | <0.01                                  | -                                 | <0.01                                      | -                                 | <0.01                        | -                                 | <0.01                                            | -                                 |
| Pd      | 105     | <0.01                                  | -                                 | <0.01                                                 | -                                 | <0.01                                  | -                                 | <0.01                                      | -                                 | <0.01                        | -                                 | <0.01                                            | -                                 |
| Ag      | 107     | <0.01                                  | -                                 | <0.01                                                 | -                                 | <0.01                                  | -                                 | <0.01                                      | -                                 | <0.01                        | -                                 | <0.01                                            | -                                 |

(Table S2 continued)

| Element | Isotope | MN <sup>+</sup> (+14 amu) |                                   | MO <sup>+</sup> (+16 amu) |                                   | MNO <sup>+</sup> (+30 amu) |                                   | MO <sub>2</sub> <sup>+</sup> (+32 amu) |                                   | MN <sub>2</sub> O <sup>+</sup> (+44 amu) |                                   | MNO <sub>2</sub> <sup>+</sup> (+46 amu) |                                   |
|---------|---------|---------------------------|-----------------------------------|---------------------------|-----------------------------------|----------------------------|-----------------------------------|----------------------------------------|-----------------------------------|------------------------------------------|-----------------------------------|-----------------------------------------|-----------------------------------|
|         |         | Formation (%)             | Flow Rate (mL min <sup>-1</sup> ) | Formation (%)             | Flow Rate (mL min <sup>-1</sup> ) | Formation (%)              | Flow Rate (mL min <sup>-1</sup> ) | Formation (%)                          | Flow Rate (mL min <sup>-1</sup> ) | Formation (%)                            | Flow Rate (mL min <sup>-1</sup> ) | Formation (%)                           | Flow Rate (mL min <sup>-1</sup> ) |
| Cd      | 114     | <0.01                     | -                                 | 0.31                      | 0.8                               | <0.01                      | -                                 | <0.01                                  | -                                 | 0.04                                     | 1.9                               | <0.01                                   | -                                 |
| In      | 115     | <0.01                     | -                                 | <0.01                     | -                                 | <0.01                      | -                                 | <0.01                                  | -                                 | <0.01                                    | -                                 | <0.01                                   | -                                 |
| Sn      | 118     | <0.01                     | -                                 | 9.8                       | 0.6                               | <0.01                      | -                                 | <0.01                                  | -                                 | 0.01                                     | 0.9                               | <0.01                                   | -                                 |
| Sb      | 121     | 0.03                      | 0.5                               | 7.8                       | 0.7                               | <0.01                      | -                                 | <0.01                                  | -                                 | 0.03                                     | 0.9                               | <0.01                                   | -                                 |
| Te      | 128     | 0.19                      | 0.9                               | 3.5                       | 0.9                               | <0.01                      | -                                 | <0.01                                  | -                                 | <0.01                                    | -                                 | <0.01                                   | -                                 |
| I       | 127     | 0.07                      | 0.8                               | 1.8                       | 0.9                               | <0.01                      | -                                 | <0.01                                  | -                                 | 0.01                                     | 1.0                               | <0.01                                   | -                                 |
| Cs      | 133     | <0.01                     | -                                 | <0.01                     | -                                 | <0.01                      | -                                 | <0.01                                  | -                                 | <0.01                                    | -                                 | <0.01                                   | -                                 |
| Ba      | 138     | 0.01                      | 0.8                               | 70                        | 0.6                               | 0.33                       | 0.6                               | 0.08                                   | 0.8                               | <0.01                                    | -                                 | <0.01                                   | -                                 |
| La      | 139     | 11                        | 0.5                               | 51                        | 0.5                               | 0.06                       | 0.5                               | 0.06                                   | 1.0                               | <0.01                                    | -                                 | <0.01                                   | -                                 |
| Ce      | 140     | 16                        | 0.4                               | 44                        | 0.6                               | 0.01                       | 0.5                               | 0.40                                   | 0.7                               | <0.01                                    | -                                 | <0.01                                   | -                                 |
| Pr      | 141     | 4.8                       | 0.6                               | 53                        | 0.6                               | 0.03                       | 0.5                               | 0.04                                   | 0.9                               | <0.01                                    | -                                 | <0.01                                   | -                                 |
| Nd      | 143     | 1.5                       | 0.5                               | 59                        | 0.6                               | 0.04                       | 0.5                               | 0.02                                   | 0.9                               | <0.01                                    | -                                 | <0.01                                   | -                                 |
| Sm      | 147     | 0.05                      | 0.7                               | 63                        | 0.6                               | 0.04                       | 0.5                               | 0.02                                   | 1.0                               | <0.01                                    | -                                 | <0.01                                   | -                                 |
| Eu      | 153     | <0.01                     | -                                 | 68                        | 0.7                               | 0.09                       | 0.7                               | 0.03                                   | 0.9                               | <0.01                                    | -                                 | <0.01                                   | -                                 |
| Gd      | 155     | 2.5                       | 0.5                               | 66                        | 0.6                               | 0.04                       | 0.5                               | 0.13                                   | 0.9                               | <0.01                                    | -                                 | <0.01                                   | -                                 |
| Tb      | 159     | 2.1                       | 0.6                               | 68                        | 0.7                               | 0.02                       | 0.4                               | 0.62                                   | 0.8                               | <0.01                                    | -                                 | <0.01                                   | -                                 |
| Dy      | 163     | 0.22                      | 0.8                               | 66                        | 0.8                               | <0.01                      | -                                 | 0.06                                   | 0.7                               | <0.01                                    | -                                 | <0.01                                   | -                                 |
| Ho      | 165     | 0.24                      | 0.7                               | 61                        | 0.8                               | <0.01                      | -                                 | 0.17                                   | 0.7                               | <0.01                                    | -                                 | <0.01                                   | -                                 |
| Er      | 166     | 0.24                      | 0.6                               | 62                        | 0.7                               | <0.01                      | -                                 | 0.56                                   | 0.9                               | <0.01                                    | -                                 | <0.01                                   | -                                 |
| Tm      | 169     | 0.02                      | 0.7                               | 53                        | 0.7                               | <0.01                      | -                                 | 0.15                                   | 0.7                               | <0.01                                    | -                                 | <0.01                                   | -                                 |
| Yb      | 174     | <0.01                     | -                                 | 48                        | 0.8                               | <0.01                      | -                                 | 0.01                                   | 0.9                               | <0.01                                    | -                                 | <0.01                                   | -                                 |
| Lu      | 175     | 0.13                      | 0.2                               | 76                        | 0.7                               | <0.01                      | -                                 | 2.8                                    | 0.6                               | <0.01                                    | -                                 | <0.01                                   | -                                 |
| Hf      | 180     | 10                        | 0.1                               | 23                        | 0.1                               | 1.7                        | 0.2                               | 81                                     | 0.5                               | <0.01                                    | -                                 | 0.02                                    | 0.4                               |
| Ta      | 181     | 7.7                       | 0.1                               | 17                        | 0.1                               | 4.3                        | 0.2                               | 54                                     | 0.5                               | <0.01                                    | -                                 | <0.01                                   | -                                 |
| W       | 184     | 8.4                       | 0.1                               | 19                        | 0.2                               | 5.0                        | 0.2                               | 7.8                                    | 0.3                               | <0.01                                    | -                                 | 0.27                                    | 0.3                               |
| Re      | 187     | 3.2                       | 0.3                               | 3.2                       | 0.2                               | 0.73                       | 0.4                               | 1.0                                    | 0.4                               | <0.01                                    | -                                 | 0.39                                    | 0.4                               |
| Os      | 189     | 7.5                       | 0.3                               | 8.5                       | 0.2                               | 2.6                        | 0.4                               | 4.1                                    | 0.4                               | <0.01                                    | -                                 | 2.4                                     | 0.4                               |
| Ir      | 193     | 2.5                       | 0.2                               | 14                        | 0.2                               | 0.58                       | 0.3                               | 9.3                                    | 0.3                               | 0.02                                     | 0.2                               | 2.5                                     | 0.6                               |
| Pt      | 195     | 0.44                      | 0.7                               | 12                        | 0.2                               | 0.05                       | 0.4                               | 96                                     | 0.7                               | 0.07                                     | 0.2                               | 0.05                                    | 0.7                               |
| Au      | 197     | <0.01                     | -                                 | 1.5                       | 0.7                               | <0.01                      | -                                 | <0.01                                  | -                                 | 1.0                                      | 0.7                               | <0.01                                   | -                                 |
| Hg      | 202     | <0.01                     | -                                 | 0.05                      | 0.8                               | <0.01                      | -                                 | <0.01                                  | -                                 | 0.13                                     | 1.8                               | <0.01                                   | -                                 |
| Tl      | 205     | <0.01                     | -                                 | <0.01                     | -                                 | <0.01                      | -                                 | <0.01                                  | -                                 | <0.01                                    | -                                 | <0.01                                   | -                                 |
| Pb      | 208     | <0.01                     | -                                 | 3.4                       | 1.0                               | <0.01                      | -                                 | <0.01                                  | -                                 | <0.01                                    | -                                 | <0.01                                   | -                                 |
| Bi      | 209     | <0.01                     | -                                 | 1.2                       | 1.3                               | <0.01                      | -                                 | <0.01                                  | -                                 | <0.01                                    | -                                 | <0.01                                   | -                                 |
| Th      | 232     | 22                        | 0.2                               | 23                        | 0.1                               | 10                         | 0.8                               | 63                                     | 0.7                               | <0.01                                    | -                                 | 0.03                                    | 0.6                               |
| U       | 238     | 15                        | 0.2                               | 27                        | 0.2                               | 9.8                        | 0.9                               | 51                                     | 0.9                               | <0.01                                    | -                                 | <0.01                                   | -                                 |

(Table S2 continued)

| Element | Isotope | MO <sub>3</sub> <sup>+</sup> (+48 amu) |                                   | MN <sub>2</sub> O <sub>2</sub> <sup>+</sup> (+60 amu) |                                   | MO <sub>4</sub> <sup>+</sup> (+64 amu) |                                   | MN <sub>2</sub> O.O <sub>2</sub> (+76 amu) |                                   | MNO.O <sub>4</sub> (+94 amu) |                                   | M(N <sub>2</sub> O) <sub>2</sub> .O <sub>2</sub> |                                   |
|---------|---------|----------------------------------------|-----------------------------------|-------------------------------------------------------|-----------------------------------|----------------------------------------|-----------------------------------|--------------------------------------------|-----------------------------------|------------------------------|-----------------------------------|--------------------------------------------------|-----------------------------------|
|         |         | Formation (%)                          | Flow Rate (mL min <sup>-1</sup> ) | Formation (%)                                         | Flow Rate (mL min <sup>-1</sup> ) | Formation (%)                          | Flow Rate (mL min <sup>-1</sup> ) | Formation (%)                              | Flow Rate (mL min <sup>-1</sup> ) | Formation (%)                | Flow Rate (mL min <sup>-1</sup> ) | Formation (%)                                    | Flow Rate (mL min <sup>-1</sup> ) |
| Cd      | 114     | <0.01                                  | -                                 | <0.01                                                 | -                                 | <0.01                                  | -                                 | <0.01                                      | -                                 | <0.01                        | -                                 | <0.01                                            | -                                 |
| In      | 115     | <0.01                                  | -                                 | <0.01                                                 | -                                 | <0.01                                  | -                                 | <0.01                                      | -                                 | <0.01                        | -                                 | <0.01                                            | -                                 |
| Sn      | 118     | <0.01                                  | -                                 | 0.01                                                  | 1.0                               | <0.01                                  | -                                 | <0.01                                      | -                                 | <0.01                        | -                                 | <0.01                                            | -                                 |
| Sb      | 121     | <0.01                                  | -                                 | <0.01                                                 | -                                 | <0.01                                  | -                                 | <0.01                                      | -                                 | <0.01                        | -                                 | <0.01                                            | -                                 |
| Te      | 128     | <0.01                                  | -                                 | <0.01                                                 | -                                 | <0.01                                  | -                                 | <0.01                                      | -                                 | <0.01                        | -                                 | <0.01                                            | -                                 |
| I       | 127     | <0.01                                  | -                                 | <0.01                                                 | -                                 | <0.01                                  | -                                 | <0.01                                      | -                                 | <0.01                        | -                                 | <0.01                                            | -                                 |
| Cs      | 133     | <0.01                                  | -                                 | <0.01                                                 | -                                 | <0.01                                  | -                                 | <0.01                                      | -                                 | <0.01                        | -                                 | <0.01                                            | -                                 |
| Ba      | 138     | <0.01                                  | -                                 | 0.06                                                  | 1.7                               | <0.01                                  | -                                 | <0.01                                      | -                                 | <0.01                        | -                                 | <0.01                                            | -                                 |
| La      | 139     | <0.01                                  | -                                 | 0.06                                                  | 1.7                               | <0.01                                  | -                                 | <0.01                                      | -                                 | <0.01                        | -                                 | <0.01                                            | -                                 |
| Ce      | 140     | <0.01                                  | -                                 | 0.08                                                  | 1.7                               | <0.01                                  | -                                 | <0.01                                      | -                                 | <0.01                        | -                                 | <0.01                                            | -                                 |
| Pr      | 141     | <0.01                                  | -                                 | 0.09                                                  | 1.7                               | <0.01                                  | -                                 | <0.01                                      | -                                 | <0.01                        | -                                 | <0.01                                            | -                                 |
| Nd      | 143     | <0.01                                  | -                                 | 0.17                                                  | 1.7                               | <0.01                                  | -                                 | <0.01                                      | -                                 | <0.01                        | -                                 | <0.01                                            | -                                 |
| Sm      | 147     | <0.01                                  | -                                 | 0.31                                                  | 1.7                               | <0.01                                  | -                                 | <0.01                                      | -                                 | <0.01                        | -                                 | <0.01                                            | -                                 |
| Eu      | 153     | <0.01                                  | -                                 | 0.33                                                  | 1.6                               | <0.01                                  | -                                 | <0.01                                      | -                                 | <0.01                        | -                                 | <0.01                                            | -                                 |
| Gd      | 155     | <0.01                                  | -                                 | 0.28                                                  | 1.2                               | <0.01                                  | -                                 | <0.01                                      | -                                 | <0.01                        | -                                 | <0.01                                            | -                                 |
| Tb      | 159     | <0.01                                  | -                                 | 0.56                                                  | 1.3                               | <0.01                                  | -                                 | 0.03                                       | 1.2                               | <0.01                        | -                                 | <0.01                                            | -                                 |
| Dy      | 163     | <0.01                                  | -                                 | 0.53                                                  | 1.4                               | <0.01                                  | -                                 | <0.01                                      | -                                 | <0.01                        | -                                 | <0.01                                            | -                                 |
| Ho      | 165     | <0.01                                  | -                                 | 0.81                                                  | 1.4                               | <0.01                                  | -                                 | <0.01                                      | -                                 | <0.01                        | -                                 | <0.01                                            | -                                 |
| Er      | 166     | <0.01                                  | -                                 | 0.49                                                  | 1.4                               | <0.01                                  | -                                 | 0.02                                       | 1.0                               | <0.01                        | -                                 | -                                                | -                                 |
| Tm      | 169     | <0.01                                  | -                                 | 0.58                                                  | 1.5                               | <0.01                                  | -                                 | <0.01                                      | -                                 | <0.01                        | -                                 | -                                                | -                                 |
| Yb      | 174     | <0.01                                  | -                                 | 0.39                                                  | 1.4                               | <0.01                                  | -                                 | <0.01                                      | -                                 | <0.01                        | -                                 | -                                                | -                                 |
| Lu      | 175     | <0.01                                  | -                                 | 0.65                                                  | 1.2                               | <0.01                                  | -                                 | 0.09                                       | 0.9                               | 0.05                         | 1.4                               | -                                                | -                                 |
| Hf      | 180     | 0.02                                   | 0.4                               | <0.01                                                 | -                                 | <0.01                                  | -                                 | 7.7                                        | 0.7                               | 5.7                          | 1.3                               | -                                                | -                                 |
| Ta      | 181     | 4.9                                    | 0.4                               | <0.01                                                 | -                                 | <0.01                                  | -                                 | 6.5                                        | 0.7                               | 12                           | 1.1                               | -                                                | -                                 |
| W       | 184     | 29                                     | 0.4                               | 0.03                                                  | 0.3                               | <0.01                                  | -                                 | <0.01                                      | -                                 | 0.33                         | 0.7                               | -                                                | -                                 |
| Re      | 187     | 3.9                                    | 0.5                               | <0.01                                                 | -                                 | 0.48                                   | 0.5                               | <0.01                                      | -                                 | 0.06                         | 0.9                               | -                                                | -                                 |
| Os      | 189     | 10                                     | 0.5                               | 0.02                                                  | 0.4                               | 50                                     | 0.9                               | 0.06                                       | 1.0                               | <0.01                        | -                                 | -                                                | -                                 |
| Ir      | 193     | 87                                     | 0.8                               | 0.18                                                  | 0.6                               | 0.06                                   | 1.8                               | 0.29                                       | 1.0                               | -                            | -                                 | -                                                | -                                 |
| Pt      | 195     | 0.20                                   | 0.7                               | 0.23                                                  | 0.7                               | <0.01                                  | -                                 | 2.6                                        | 1.7                               | -                            | -                                 | -                                                | -                                 |
| Au      | 197     | <0.01                                  | -                                 | 0.08                                                  | 1.6                               | <0.01                                  | -                                 | <0.01                                      | -                                 | -                            | -                                 | -                                                | -                                 |
| Hg      | 202     | <0.01                                  | -                                 | <0.01                                                 | -                                 | <0.01                                  | -                                 | <0.01                                      | -                                 | -                            | -                                 | -                                                | -                                 |
| Tl      | 205     | <0.01                                  | -                                 | <0.01                                                 | -                                 | <0.01                                  | -                                 | <0.01                                      | -                                 | -                            | -                                 | -                                                | -                                 |
| Pb      | 208     | <0.01                                  | -                                 | <0.01                                                 | -                                 | <0.01                                  | -                                 | <0.01                                      | -                                 | -                            | -                                 | -                                                | -                                 |
| Bi      | 209     | <0.01                                  | -                                 | <0.01                                                 | -                                 | <0.01                                  | -                                 | <0.01                                      | -                                 | -                            | -                                 | -                                                | -                                 |
| Th      | 232     | 0.03                                   | 1.0                               | -                                                     | -                                 | -                                      | -                                 | -                                          | -                                 | -                            | -                                 | -                                                | -                                 |
| U       | 238     | -                                      | -                                 | -                                                     | -                                 | -                                      | -                                 | -                                          | -                                 | -                            | -                                 | -                                                | -                                 |

Table S3: Maximum obtained formation of selected product ions for 73 analytes using O<sub>2</sub> reaction gas. Flow rates of O<sub>2</sub> provided are at the optimum formation using a Perkin Elmer NexION 5000.

| Element | Isotope | MO <sup>+</sup> (+16 amu) |                                   | MO <sub>2</sub> <sup>+</sup> (+32 amu) |                                   | MO <sub>3</sub> <sup>+</sup> (+48 amu) |                                   | Element | Isotope | MO <sup>+</sup> (+16 amu) |                                   | MO <sub>2</sub> <sup>+</sup> (+32 amu) |                                   | MO <sub>3</sub> <sup>+</sup> (+48 amu) |                                   |
|---------|---------|---------------------------|-----------------------------------|----------------------------------------|-----------------------------------|----------------------------------------|-----------------------------------|---------|---------|---------------------------|-----------------------------------|----------------------------------------|-----------------------------------|----------------------------------------|-----------------------------------|
|         |         | Formation (%)             | Flow Rate (mL min <sup>-1</sup> ) | Formation (%)                          | Flow Rate (mL min <sup>-1</sup> ) | Formation (%)                          | Flow Rate (mL min <sup>-1</sup> ) |         |         | Formation (%)             | Flow Rate (mL min <sup>-1</sup> ) | Formation (%)                          | Flow Rate (mL min <sup>-1</sup> ) | Formation (%)                          | Flow Rate (mL min <sup>-1</sup> ) |
| Li      | 7       | <0.01                     | -                                 | <0.01                                  | -                                 | <0.01                                  | -                                 | Cd      | 114     | 0.02                      | 0.3                               | <0.01                                  | -                                 | <0.01                                  | -                                 |
| Be      | 9       | 0.21                      | 0.3                               | <0.01                                  | -                                 | <0.01                                  | -                                 | In      | 115     | <0.01                     | -                                 | <0.01                                  | -                                 | <0.01                                  | -                                 |
| B       | 11      | 2.1                       | 0.2                               | 0.07                                   | 0.2                               | <0.01                                  | -                                 | Sn      | 118     | 0.46                      | 0.3                               | 0.01                                   | 0.8                               | <0.01                                  | -                                 |
| Na      | 23      | <0.01                     | -                                 | <0.01                                  | -                                 | <0.01                                  | -                                 | Sb      | 121     | 4.8                       | 0.5                               | <0.01                                  | -                                 | <0.01                                  | -                                 |
| Mg      | 24      | 0.41                      | 0.3                               | <0.01                                  | -                                 | <0.01                                  | -                                 | Te      | 128     | 1.9                       | 0.4                               | <0.01                                  | -                                 | <0.01                                  | -                                 |
| Al      | 27      | 0.43                      | 0.2                               | <0.01                                  | -                                 | <0.01                                  | -                                 | I       | 127     | 0.51                      | 0.5                               | <0.01                                  | -                                 | <0.01                                  | -                                 |
| Si      | 29      | 3.2                       | 0.3                               | 0.06                                   | 0.4                               | <0.01                                  | -                                 | Cs      | 133     | <0.01                     | -                                 | <0.01                                  | -                                 | <0.01                                  | -                                 |
| P       | 31      | 10                        | 0.4                               | 0.02                                   | 0.4                               | <0.01                                  | -                                 | Ba      | 138     | 1.8                       | 0.4                               | 0.07                                   | 0.6                               | <0.01                                  | -                                 |
| S       | 34      | 7.6                       | 0.3                               | 0.02                                   | 0.4                               | <0.01                                  | -                                 | La      | 139     | 20                        | 0.3                               | 0.27                                   | 0.4                               | <0.01                                  | -                                 |
| Cl      | 35      | 0.73                      | 0.2                               | <0.01                                  | -                                 | <0.01                                  | -                                 | Ce      | 140     | 24                        | 0.3                               | 0.22                                   | 0.4                               | <0.01                                  | -                                 |
| K       | 39      | <0.01                     | -                                 | <0.01                                  | -                                 | <0.01                                  | -                                 | Pr      | 141     | 25                        | 0.3                               | 0.11                                   | 0.4                               | <0.01                                  | -                                 |
| Ca      | 44      | 1.1                       | 0.3                               | 0.04                                   | 0.4                               | <0.01                                  | -                                 | Nd      | 143     | 26                        | 0.3                               | 0.10                                   | 0.4                               | <0.01                                  | -                                 |
| Sc      | 45      | 8.9                       | 0.4                               | 0.10                                   | 0.5                               | <0.01                                  | -                                 | Sm      | 147     | 18                        | 0.4                               | 0.07                                   | 0.6                               | <0.01                                  | -                                 |
| Ti      | 47      | 10                        | 0.4                               | 0.12                                   | 0.5                               | <0.01                                  | -                                 | Eu      | 153     | 5.0                       | 0.4                               | 0.08                                   | 0.7                               | <0.01                                  | -                                 |
| V       | 51      | 5.5                       | 0.4                               | 0.07                                   | 0.5                               | <0.01                                  | -                                 | Gd      | 155     | 21                        | 0.3                               | 0.23                                   | 0.4                               | <0.01                                  | -                                 |
| Cr      | 52      | 1.5                       | 0.3                               | <0.01                                  | -                                 | <0.01                                  | -                                 | Tb      | 159     | 27                        | 0.3                               | 0.20                                   | 0.5                               | <0.01                                  | -                                 |
| Mn      | 55      | 0.99                      | 0.3                               | <0.01                                  | -                                 | <0.01                                  | -                                 | Dy      | 163     | 28                        | 0.3                               | 0.09                                   | 0.5                               | <0.01                                  | -                                 |
| Fe      | 57      | 1.9                       | 0.3                               | <0.01                                  | -                                 | <0.01                                  | -                                 | Ho      | 165     | 27                        | 0.3                               | 0.12                                   | 0.5                               | <0.01                                  | -                                 |
| Co      | 59      | 1.5                       | 0.3                               | <0.01                                  | -                                 | <0.01                                  | -                                 | Er      | 166     | 29                        | 0.3                               | 0.16                                   | 0.4                               | <0.01                                  | -                                 |
| Ni      | 60      | 0.52                      | 0.3                               | <0.01                                  | -                                 | <0.01                                  | -                                 | Tm      | 169     | 21                        | 0.4                               | 0.08                                   | 0.5                               | <0.01                                  | -                                 |
| Cu      | 63      | 0.06                      | 0.3                               | <0.01                                  | -                                 | <0.01                                  | -                                 | Yb      | 174     | 4.3                       | 0.5                               | 0.05                                   | 0.7                               | <0.01                                  | -                                 |
| Zn      | 66      | 0.11                      | 0.3                               | <0.01                                  | -                                 | <0.01                                  | -                                 | Lu      | 175     | 33                        | 0.4                               | 0.28                                   | 0.5                               | <0.01                                  | -                                 |
| Ga      | 69      | <0.01                     | -                                 | <0.01                                  | -                                 | <0.01                                  | -                                 | Hf      | 180     | 37                        | 0.3                               | 7.1                                    | 0.5                               | 0.03                                   | 0.6                               |
| Ge      | 74      | 2.3                       | 0.3                               | 0.04                                   | 0.5                               | <0.01                                  | -                                 | Ta      | 181     | 25                        | 0.2                               | 13                                     | 0.5                               | <0.01                                  | -                                 |
| As      | 75      | 8.3                       | 0.4                               | <0.01                                  | -                                 | <0.01                                  | -                                 | W       | 184     | 26                        | 0.2                               | 15                                     | 0.5                               | 0.10                                   | 0.7                               |
| Se      | 82      | 3.6                       | 0.4                               | <0.01                                  | -                                 | <0.01                                  | -                                 | Re      | 187     | 12                        | 0.4                               | 6.9                                    | 0.7                               | 1.5                                    | 0.9                               |
| Br      | 81      | 1.2                       | 0.3                               | <0.01                                  | -                                 | <0.01                                  | -                                 | Os      | 189     | 13                        | 0.4                               | 3.9                                    | 0.8                               | 0.07                                   | 0.9                               |
| Rb      | 85      | <0.01                     | -                                 | <0.01                                  | -                                 | <0.01                                  | -                                 | Ir      | 193     | 3.6                       | 0.5                               | 0.07                                   | 1.0                               | <0.01                                  | -                                 |
| Sr      | 88      | 1.0                       | 0.3                               | 0.04                                   | 0.5                               | <0.01                                  | -                                 | Pt      | 195     | 0.46                      | 0.6                               | <0.01                                  | -                                 | <0.01                                  | -                                 |
| Y       | 89      | 13                        | 0.3                               | 0.20                                   | 0.4                               | <0.01                                  | -                                 | Au      | 197     | 0.04                      | 0.4                               | <0.01                                  | -                                 | <0.01                                  | -                                 |
| Zr      | 90      | 17                        | 0.3                               | 1.7                                    | 0.5                               | 0.01                                   | 0.9                               | Hg      | 202     | <0.01                     | -                                 | <0.01                                  | -                                 | <0.01                                  | -                                 |
| Nb      | 93      | 12                        | 0.3                               | 5.1                                    | 0.6                               | <0.01                                  | -                                 | Tl      | 205     | <0.01                     | -                                 | <0.01                                  | -                                 | <0.01                                  | -                                 |
| Mo      | 98      | 6.7                       | 0.3                               | 3.6                                    | 0.7                               | <0.01                                  | -                                 | Pb      | 208     | 0.03                      | 0.5                               | <0.01                                  | -                                 | <0.01                                  | -                                 |
| Ru      | 101     | 3.1                       | 0.4                               | 0.03                                   | 0.6                               | <0.01                                  | -                                 | Bi      | 209     | 0.25                      | 0.7                               | <0.01                                  | -                                 | <0.01                                  | -                                 |
| Rh      | 103     | 0.46                      | 0.4                               | <0.01                                  | -                                 | <0.01                                  | -                                 | Th      | 232     | 39                        | 0.2                               | 13                                     | 0.5                               | <0.01                                  | -                                 |
| Pd      | 105     | 0.04                      | 0.4                               | <0.01                                  | -                                 | <0.01                                  | -                                 | U       | 238     | 31                        | 0.1                               | 22                                     | 0.4                               | -                                      | -                                 |
| Ag      | 107     | <0.01                     | -                                 | <0.01                                  | -                                 | <0.01                                  | -                                 |         |         |                           |                                   |                                        |                                   |                                        |                                   |

Table S4: Comparison of determined limit of detection (LOD) and background equivalence concentration (BEC) for standard mode and mass-shift determinations with N<sub>2</sub>O reaction gas using a Perkin Elmer NexION 5000. LODs were calculated based on 3 times the standard deviation of the blank and expressed in ng g<sup>-1</sup>. BECs were calculated by division of the blank signal with the calibration slope and expressed in ng g<sup>-1</sup>. Improvement in LOD and BEC are given as a factor of how much lower these parameters are when compared to standard mode. Values are presented to 2 significant figures.

| Element | Isotope | Standard Mode                |                              | N <sub>2</sub> O Mode   |                  |                                          |                              |                    |                              |                    |
|---------|---------|------------------------------|------------------------------|-------------------------|------------------|------------------------------------------|------------------------------|--------------------|------------------------------|--------------------|
|         |         | LOD<br>(ng g <sup>-1</sup> ) | BEC<br>(ng g <sup>-1</sup> ) | Measured<br>Product Ion | Measured<br>Mass | Gas Flow Rate<br>(mL min <sup>-1</sup> ) | LOD<br>(ng g <sup>-1</sup> ) | LOD<br>Improvement | BEC<br>(ng g <sup>-1</sup> ) | BEC<br>Improvement |
| Be      | 9       | 0.003 9                      | 0.003 4                      | BeO <sub>2</sub>        | 41               | 0.3                                      | 0.011                        | 0.34               | 0.003 8                      | 0.90               |
| B       | 11      | 0.59                         | 5.9                          | BO                      | 27               | 0.1                                      | 0.29                         | 2.0                | 3.7                          | 1.6                |
| Mg      | 24      | 0.001 7                      | 0.016                        | MgO                     | 40               | 0.5                                      | 0.002 2                      | 0.77               | 0.019                        | 0.84               |
| Al      | 27      | 0.001 6                      | 0.019                        | AlO                     | 43               | 0.1                                      | 0.014                        | 0.113              | 0.022                        | 0.87               |
| Si      | 28      | 19                           | 270                          | SiO <sub>2</sub>        | 60               | 0.3                                      | 0.14                         | 130                | 2.1                          | 130                |
| Si      | 29      | 35                           | 610                          | SiO                     | 45               | 0.2                                      | 51                           | 0.68               | 1000                         | 0.59               |
| P       | 31      | 3.4                          | 20                           | PO                      | 47               | 0.4                                      | 0.062                        | 56                 | 0.43                         | 47                 |
| S       | 34      | 47                           | 1000                         | SN                      | 48               | 0.5                                      | 1.3                          | 35                 | 1.9                          | 530                |
| Cl      | 35      | 7.8                          | 210                          | ClO                     | 51               | 0.2                                      | 28                           | 46                 | 170                          | 120                |
| Ca      | 44      | 0.44                         | 18                           | CaO                     | 60               | 0.4                                      | 0.12                         | 0.28               | 2.8                          | 1.2                |
| Sc      | 45      | 0.002 7                      | 0.054                        | ScO                     | 61               | 0.4                                      | 0.000 15                     | 3.64               | 0.000 096                    | 6.4                |
| Ti      | 47      | 0.000 86                     | 0.006 3                      | TiO                     | 63               | 0.3                                      | 0.000 33                     | 18                 | 0.002 9                      | 560                |
| Ti      | 47      | 0.000 86                     | 0.006 3                      | TiO <sub>2</sub>        | 79               | 0.6                                      | 0.000 31                     | 2.6                | 0.000 36                     | 2.2                |
| V       | 51      | 0.000 36                     | 0.002 1                      | VO                      | 67               | 0.4                                      | 0.000 18                     | 2.7                | 0.000 024                    | 18                 |
| Cr      | 52      | 0.15                         | 10                           | CrO                     | 68               | 0.4                                      | 0.005 4                      | 2.0                | 0.002 3                      | 88                 |
| Mn      | 55      | 0.001 3                      | 0.015                        | MnO                     | 71               | 0.4                                      | 0.000 71                     | 27                 | 0.000 83                     | 4500               |
| Fe      | 57      | 3.5                          | 65                           | FeO                     | 73               | 0.7                                      | 0.010                        | 1.8                | 0.007 8                      | 19                 |
| Co      | 59      | 0.000 79                     | 0.004 8                      | CoO                     | 75               | 0.5                                      | 0.000 25                     | 340                | 0.000 092                    | 8300               |
| Ni      | 60      | 0.002 1                      | 0.007 9                      | NiO                     | 76               | 0.4                                      | 0.009 5                      | 3.1                | 0.006 1                      | 52                 |
| Cu      | 63      | 0.000 50                     | 0.005 2                      | CuN <sub>2</sub> O      | 107              | 0.5                                      | 0.007 9                      | 0.22               | 0.003 1                      | 1.3                |
| Zn      | 66      | 0.004 0                      | 0.019                        | ZnO                     | 82               | 0.4                                      | 0.023                        | 0.064              | 0.010                        | 1.7                |
| Ge      | 74      | 0.001 9                      | 0.004 8                      | GeO                     | 90               | 0.4                                      | 0.000 082                    | 0.17               | 0.000 011                    | 1.9                |
| As      | 75      | 0.000 34                     | 0.000 53                     | AsO                     | 91               | 0.4                                      | 0.000 60                     | 23                 | 0.000 13                     | 430                |
| Se      | 82      | 0.036                        | 0.16                         | SeO                     | 98               | 1.3                                      | 0.012                        | 0.57               | 0.001 7                      | 4.1                |
| Br      | 81      | 5.0                          | 130                          | BrO                     | 97               | 0.5                                      | 1.5                          | 2.9                | 77                           | 97                 |
| Sr      | 88      | 0.000 21                     | 0.001 1                      | SrO                     | 104              | 0.5                                      | 0.000 43                     | 3.4                | 0.001 0                      | 1.7                |
| Y       | 89      | 0.000 033                    | 0.000 036                    | YO                      | 105              | 0.4                                      | 0.000 078                    | 0.49               | 0.000 026                    | 1.0                |
| Zr      | 90      | 0.000 59                     | 0.000 29                     | ZrO <sub>2</sub>        | 122              | 0.5                                      | 0.000 038                    | 0.42               | 0.000 026                    | 1.4                |
| Nb      | 93      | 0.000 12                     | 0.000 070                    | NbO <sub>2</sub>        | 125              | 0.5                                      | 0.000 46                     | 16                 | 0.000 13                     | 11                 |
| Mo      | 98      | 0.000 33                     | 0.000 25                     | MoO <sub>3</sub>        | 146              | 0.4                                      | 0.001 3                      | 0.25               | 0.000 17                     | 0.53               |
| Ru      | 101     | 0.001 4                      | 0.006 7                      | RuO <sub>3</sub>        | 149              | 0.5                                      | 0.003 5                      | 0.25               | 0.000 48                     | 1.4                |
| Rh      | 103     | 0.000 12                     | 0.000 17                     | RhO                     | 119              | 0.6                                      | 0.002 5                      | 0.41               | 0.000 54                     | 14                 |
| Pd      | 105     | 0.000 29                     | 0.000 38                     | PdO                     | 121              | 0.6                                      | 0.066                        | 0.049              | 0.014                        | 0.32               |
| Ag      | 107     | 0.000 51                     | 0.001 7                      | AgN <sub>2</sub> O      | 151              | 1.7                                      | 0.062                        | 0.004 4            | 0.008 4                      | 0.027              |



(Table S4 continued)

| Element | Isotope | Standard Mode                |                              | N <sub>2</sub> O DRC Mode |                  |                                          |                              |                    |                              |                    |
|---------|---------|------------------------------|------------------------------|---------------------------|------------------|------------------------------------------|------------------------------|--------------------|------------------------------|--------------------|
|         |         | LOD<br>(ng g <sup>-1</sup> ) | BEC<br>(ng g <sup>-1</sup> ) | Measured<br>Product Ion   | Measured<br>Mass | Gas Flow Rate<br>(mL min <sup>-1</sup> ) | LOD<br>(ng g <sup>-1</sup> ) | LOD<br>Improvement | BEC<br>(ng g <sup>-1</sup> ) | BEC<br>Improvement |
| Cd      | 114     | 0.000 26                     | 0.000 23                     | CdO                       | 130              | 0.8                                      | 0.024                        | 0.011              | 0.003 2                      | 0.071              |
| Sn      | 118     | 0.000 34                     | 0.000 50                     | SnO                       | 134              | 0.6                                      | 0.001 7                      | 0.19               | 0.000 53                     | 0.95               |
| Sb      | 121     | 0.000 72                     | 0.000 96                     | SbO                       | 137              | 0.7                                      | 0.003 8                      | 0.19               | 0.001 6                      | 0.59               |
| Te      | 128     | 0.004 8                      | 0.014                        | TeO                       | 144              | 0.9                                      | 0.007                        | 0.69               | 0.001 5                      | 9.4                |
| I       | 127     | 0.016                        | 0.71                         | IO                        | 143              | 0.9                                      | 0.14                         | 0.11               | 0.79                         | 0.90               |
| Ba      | 138     | 0.000 22                     | 0.000 19                     | BaO                       | 154              | 0.6                                      | 0.000 33                     | 0.65               | 0.000 53                     | 0.36               |
| La      | 139     | 0.000 055                    | 0.000 034                    | LaO                       | 155              | 0.5                                      | 0.000 13                     | 0.44               | 0.000 067                    | 0.51               |
| Ce      | 140     | 0.000 083                    | 0.000 040                    | CeO                       | 156              | 0.6                                      | 0.000 29                     | 0.284              | 0.000 12                     | 0.34               |
| Pr      | 141     | 0.000 015                    | 0.000 027                    | PrO                       | 157              | 0.6                                      | 0.000 059                    | 0.26               | 0.000 035                    | 0.77               |
| Nd      | 143     | 0.000 47                     | 0.000 14                     | NdO                       | 159              | 0.6                                      | 0.000 29                     | 1.6                | 0.000 087                    | 1.6                |
| Sm      | 147     | 0.000 13                     | 0.000 029                    | SmO                       | 163              | 0.6                                      | 0.000 17                     | 0.79               | 0.000 023                    | 1.3                |
| Eu      | 153     | 0.000 032                    | 0.000 004                    | EuO                       | 169              | 0.7                                      | 0.000 047                    | 0.68               | 0.000 006                    | 0.68               |
| Gd      | 155     | 0.000 77                     | 0.001 4                      | GdO                       | 171              | 0.6                                      | 0.001 6                      | 0.48               | 0.001 2                      | 1.2                |
| Tb      | 159     | 0.000 13                     | 0.000 29                     | TbO                       | 175              | 0.7                                      | 0.000 16                     | 0.83               | 0.000 25                     | 1.1                |
| Dy      | 163     | 0.001 5                      | 0.001 4                      | DyO                       | 179              | 0.8                                      | 0.001 3                      | 1.2                | 0.000 85                     | 1.6                |
| Ho      | 165     | 0.000 17                     | 0.000 27                     | HoO                       | 181              | 0.8                                      | 0.000 22                     | 0.80               | 0.000 25                     | 1.1                |
| Er      | 166     | 0.000 81                     | 0.000 60                     | ErO                       | 182              | 0.7                                      | 0.000 47                     | 1.7                | 0.000 83                     | 0.72               |
| Tm      | 169     | 0.000 11                     | 0.000 078                    | TmO                       | 185              | 0.7                                      | 0.000 12                     | 0.94               | 0.000 061                    | 1.3                |
| Yb      | 174     | 0.000 16                     | 0.000 067                    | YbO                       | 190              | 0.8                                      | 0.000 23                     | 0.73               | 0.000 031                    | 2.2                |
| Lu      | 175     | 0.000 11                     | 0.000 062                    | LuO                       | 191              | 0.7                                      | 0.000 051                    | 2.3                | 0.000 007                    | 9.1                |
| Hf      | 180     | 0.000 10                     | 0.000 014                    | HfO <sub>2</sub>          | 212              | 0.5                                      | 0.000 16                     | 0.64               | 0.000 035                    | 0.40               |
| Ta      | 181     | 0.000 094                    | 0.000 019                    | TaO <sub>2</sub>          | 213              | 0.5                                      | 0.000 21                     | 0.46               | 0.000 035                    | 0.54               |
| W       | 184     | 0.000 26                     | 0.000 087                    | WO <sub>3</sub>           | 232              | 0.4                                      | 0.000 26                     | 1.0                | 0.000 035                    | 2.4                |
| Re      | 187     | 0.000 11                     | 0.000 044                    | ReO <sub>3</sub>          | 235              | 0.5                                      | 0.001 2                      | 0.093              | 0.000 26                     | 0.17               |
| Os      | 189     | 0.000 26                     | 0.000 051                    | OsO <sub>4</sub>          | 253              | 0.9                                      | 0.000 25                     | 1.0                | 0.000 034                    | 1.5                |
| Ir      | 193     | 0.000 42                     | 0.000 46                     | IrO <sub>3</sub>          | 241              | 0.8                                      | 0.000 074                    | 5.6                | 0.000 023                    | 20                 |
| Pt      | 195     | 0.001 4                      | 0.000 85                     | PtO <sub>2</sub>          | 227              | 0.7                                      | 0.001 1                      | 1.3                | 0.001 0                      | 0.83               |
| Au      | 197     | 0.002 0                      | 0.004 4                      | AuO                       | 213              | 0.7                                      | 0.016                        | 0.12               | 0.004 5                      | 0.99               |
| Hg      | 202     | 0.006 0                      | 0.006 1                      | HgN <sub>2</sub> O        | 246              | 1.8                                      | 0.88                         | 0.006 8            | 0.12                         | 0.051              |
| Pb      | 208     | 0.000 15                     | 0.000 020                    | PbO                       | 224              | 1.0                                      | 0.002 2                      | 0.067              | 0.000 30                     | 0.067              |
| Bi      | 209     | 0.000 049                    | 0.000 067                    | BiO                       | 225              | 1.3                                      | 0.004 1                      | 0.012              | 0.000 56                     | 0.012              |
| Th      | 232     | 0.000 084                    | 0.000 026                    | ThO <sub>2</sub>          | 264              | 0.7                                      | 0.000 10                     | 0.842              | 0.000 014                    | 1.9                |
| U       | 238     | 0.000 063                    | 0.000 014                    | UO <sub>2</sub>           | 270              | 0.9                                      | 0.000 19                     | 0.33               | 0.000 053                    | 0.26               |

Table S5: Comparison of determined limit of detection (LOD) and background equivalence concentration (BEC) for standard mode and mass-shift determinations with O<sub>2</sub> reaction gas using a Perkin Elmer NexION 5000. LODs were calculated based on 3 times the standard deviation of the blank and expressed in ng g<sup>-1</sup>. BECs were calculated by division of the blank signal with the calibration slope and expressed in ng g<sup>-1</sup>. Improvement in LOD and BEC are given as a factor of how much lower these parameters are when compared to standard mode. Values are presented to 2 significant figures.

| Element | Isotope | Standard Mode                |                              | O <sub>2</sub> Mode     |                  |                                          |                              |                    |                              |                    |
|---------|---------|------------------------------|------------------------------|-------------------------|------------------|------------------------------------------|------------------------------|--------------------|------------------------------|--------------------|
|         |         | LOD<br>(ng g <sup>-1</sup> ) | BEC<br>(ng g <sup>-1</sup> ) | Measured<br>Product Ion | Measured<br>Mass | Gas Flow Rate<br>(mL min <sup>-1</sup> ) | LOD<br>(ng g <sup>-1</sup> ) | LOD<br>Improvement | BEC<br>(ng g <sup>-1</sup> ) | BEC<br>Improvement |
| Be      | 9       | 0.003 9                      | 0.003 4                      | BeO                     | 25               | 0.3                                      | 0.11                         | 0.035              | 0.015                        | 0.22               |
| B       | 11      | 0.59                         | 5.9                          | BO                      | 27               | 0.2                                      | 0.58                         | 1.0                | 2.4                          | 2.5                |
| Mg      | 24      | 0.001 7                      | 0.016                        | MgO                     | 40               | 0.3                                      | 0.073                        | 0.023              | 0.069                        | 0.22               |
| Al      | 27      | 0.001 6                      | 0.019                        | AlO                     | 43               | 0.2                                      | 0.036                        | 0.044              | 0.019                        | 0.98               |
| Si      | 28      | 19                           | 270                          | SiO                     | 44               | 0.3                                      | 0.39                         | 18                 | 5.9                          | 63                 |
| Si      | 29      | 35                           | 610                          | SiO                     | 45               | 0.3                                      | 2.0                          | 48                 | 9.7                          | 46                 |
| P       | 31      | 3.4                          | 20                           | PO                      | 47               | 0.4                                      | 0.11                         | 31                 | 0.4                          | 51                 |
| S       | 34      | 47                           | 1000                         | SO                      | 50               | 0.3                                      | 0.51                         | 92                 | 3.0                          | 330                |
| Cl      | 35      | 7.8                          | 210                          | ClO                     | 51               | 0.2                                      | 27                           | 0.30               | 73                           | 2.8                |
| Ca      | 44      | 0.44                         | 18                           | CaO                     | 60               | 0.3                                      | 0.97                         | 0.46               | 2.0                          | 8.7                |
| Sc      | 45      | 0.002 7                      | 0.054                        | ScO                     | 61               | 0.4                                      | 0.000 75                     | 3.6                | 0.000 39                     | 140                |
| Ti      | 47      | 0.000 86                     | 0.006 3                      | TiO                     | 63               | 0.4                                      | 0.000 92                     | 0.93               | 0.000 81                     | 7.9                |
| V       | 51      | 0.000 36                     | 0.002 1                      | VO                      | 67               | 0.4                                      | 0.000 53                     | 0.67               | 0.000 072                    | 29                 |
| Cr      | 52      | 0.15                         | 10                           | CrO                     | 68               | 0.3                                      | 0.004 4                      | 34                 | 0.001 8                      | 5700               |
| Mn      | 55      | 0.001 3                      | 0.015                        | MnO                     | 71               | 0.3                                      | 0.002 4                      | 0.56               | 0.000 93                     | 17                 |
| Fe      | 57      | 3.5                          | 65                           | FeO                     | 73               | 0.3                                      | 0.036                        | 98                 | 0.015                        | 4200               |
| Co      | 59      | 0.000 79                     | 0.004 8                      | CoO                     | 75               | 0.3                                      | 0.001 1                      | 0.74               | 0.000 23                     | 21                 |
| Ni      | 60      | 0.002 1                      | 0.007 9                      | NiO                     | 76               | 0.3                                      | 0.032                        | 0.067              | 0.011                        | 0.75               |
| Cu      | 63      | 0.000 50                     | 0.005 2                      | CuO                     | 79               | 0.3                                      | 0.045                        | 0.011              | 0.006 1                      | 0.85               |
| Zn      | 66      | 0.004 0                      | 0.019                        | ZnO                     | 82               | 0.3                                      | 0.11                         | 0.036              | 0.015                        | 1.3                |
| Ge      | 74      | 0.001 9                      | 0.004 8                      | GeO                     | 90               | 0.3                                      | 0.002 4                      | 0.78               | 0.000 33                     | 15                 |
| As      | 75      | 0.000 34                     | 0.000 53                     | AsO                     | 91               | 0.4                                      | 0.002 1                      | 0.16               | 0.000 28                     | 1.9                |
| Se      | 82      | 0.036                        | 0.16                         | SeO                     | 98               | 0.4                                      | 0.036                        | 0.98               | 0.005                        | 33                 |
| Br      | 81      | 5.0                          | 130                          | BrO                     | 97               | 0.3                                      | 4.0                          | 1.2                | 21                           | 6.3                |
| Sr      | 88      | 0.000 21                     | 0.001 1                      | SrO                     | 104              | 0.3                                      | 0.003 4                      | 0.062              | 0.001 7                      | 0.63               |
| Y       | 89      | 0.000 033                    | 0.000 036                    | YO                      | 105              | 0.3                                      | 0.000 094                    | 0.35               | 0.000 037                    | 0.96               |
| Zr      | 90      | 0.000 59                     | 0.000 29                     | ZrO                     | 106              | 0.3                                      | 0.000 44                     | 1.4                | 0.000 13                     | 2.3                |
| Nb      | 93      | 0.000 12                     | 0.000 070                    | NbO                     | 109              | 0.3                                      | 0.000 23                     | 0.51               | 0.000 16                     | 0.45               |
| Mo      | 98      | 0.000 33                     | 0.000 25                     | MoO                     | 114              | 0.3                                      | 0.000 73                     | 0.45               | 0.000 099                    | 2.5                |
| Ru      | 101     | 0.001 4                      | 0.006 7                      | RuO                     | 117              | 0.4                                      | 0.010                        | 0.14               | 0.006 2                      | 1.1                |
| Rh      | 103     | 0.000 12                     | 0.000 17                     | RhO                     | 119              | 0.4                                      | 0.002 9                      | 0.042              | 0.000 40                     | 0.43               |
| Pd      | 105     | 0.000 29                     | 0.000 38                     | PdO                     | 121              | 0.4                                      | 0.19                         | 0.001 5            | 0.042                        | 0.009 2            |

(Table S5 continued)

| Element | Isotope | Standard Mode                |                              | O <sub>2</sub> DRC Mode |                  |                                          |                              |                    |                              |                    |
|---------|---------|------------------------------|------------------------------|-------------------------|------------------|------------------------------------------|------------------------------|--------------------|------------------------------|--------------------|
|         |         | LOD<br>(ng g <sup>-1</sup> ) | BEC<br>(ng g <sup>-1</sup> ) | Measured<br>Product Ion | Measured<br>Mass | Gas Flow Rate<br>(mL min <sup>-1</sup> ) | LOD<br>(ng g <sup>-1</sup> ) | LOD<br>Improvement | BEC<br>(ng g <sup>-1</sup> ) | BEC<br>Improvement |
| Cd      | 114     | 0.000 26                     | 0.000 23                     | CdO                     | 130              | 0.3                                      | 0.38                         | 0.000 70           | 0.051                        | 0.004 5            |
| Sn      | 118     | 0.000 34                     | 0.000 50                     | SnO                     | 134              | 0.3                                      | 0.017                        | 0.019              | 0.003 7                      | 0.13               |
| Sb      | 121     | 0.000 72                     | 0.000 96                     | SbO                     | 137              | 0.5                                      | 0.006 6                      | 0.11               | 0.001 3                      | 0.72               |
| Te      | 128     | 0.004 8                      | 0.014                        | TeO                     | 144              | 0.4                                      | 0.010                        | 0.47               | 0.001 4                      | 10                 |
| I       | 127     | 0.016                        | 0.71                         | IO                      | 143              | 0.5                                      | 0.21                         | 0.076              | 0.28                         | 2.6                |
| Ba      | 138     | 0.000 22                     | 0.000 19                     | BaO                     | 154              | 0.4                                      | 0.001 6                      | 0.14               | 0.000 33                     | 0.57               |
| La      | 139     | 0.000 055                    | 0.000 034                    | LaO                     | 155              | 0.3                                      | 0.000 19                     | 0.30               | 0.000 069                    | 0.49               |
| Ce      | 140     | 0.000 083                    | 0.000 040                    | CeO                     | 156              | 0.3                                      | 0.000 22                     | 0.38               | 0.000 094                    | 0.42               |
| Pr      | 141     | 0.000 015                    | 0.000 027                    | PrO                     | 157              | 0.3                                      | 0.000 094                    | 0.16               | 0.000 050                    | 0.54               |
| Nd      | 143     | 0.000 47                     | 0.000 14                     | NdO                     | 159              | 0.3                                      | 0.001 4                      | 0.34               | 0.000 33                     | 0.42               |
| Sm      | 147     | 0.000 13                     | 0.000 029                    | SmO                     | 163              | 0.4                                      | 0.000 79                     | 0.17               | 0.000 24                     | 0.12               |
| Eu      | 153     | 0.000 032                    | 0.000 004                    | EuO                     | 169              | 0.4                                      | 0.000 64                     | 0.050              | 0.000 087                    | 0.050              |
| Gd      | 155     | 0.000 77                     | 0.001 4                      | GdO                     | 171              | 0.3                                      | 0.002 9                      | 0.27               | 0.001 5                      | 0.95               |
| Tb      | 159     | 0.000 13                     | 0.000 29                     | TbO                     | 175              | 0.3                                      | 0.000 47                     | 0.28               | 0.000 30                     | 0.98               |
| Dy      | 163     | 0.001 5                      | 0.001 4                      | DyO                     | 179              | 0.3                                      | 0.002 5                      | 0.59               | 0.001 5                      | 0.90               |
| Ho      | 165     | 0.000 17                     | 0.000 27                     | HoO                     | 181              | 0.3                                      | 0.000 50                     | 0.35               | 0.000 24                     | 1.1                |
| Er      | 166     | 0.000 81                     | 0.000 60                     | ErO                     | 182              | 0.3                                      | 0.000 86                     | 0.94               | 0.000 65                     | 0.92               |
| Tm      | 169     | 0.000 11                     | 0.000 078                    | TmO                     | 185              | 0.4                                      | 0.000 21                     | 0.53               | 0.000 045                    | 1.7                |
| Yb      | 174     | 0.000 16                     | 0.000 067                    | YbO                     | 190              | 0.5                                      | 0.002 5                      | 0.065              | 0.000 34                     | 0.20               |
| Lu      | 175     | 0.000 11                     | 0.000 062                    | LuO                     | 191              | 0.4                                      | 0.000 13                     | 0.91               | 0.000 047                    | 1.3                |
| Hf      | 180     | 0.000 10                     | 0.000 014                    | HfO                     | 196              | 0.3                                      | 0.000 35                     | 0.29               | 0.000 076                    | 0.18               |
| Ta      | 181     | 0.000 094                    | 0.000 019                    | TaO                     | 197              | 0.2                                      | 0.000 18                     | 0.51               | 0.000 025                    | 0.75               |
| W       | 184     | 0.000 26                     | 0.000 087                    | WO                      | 200              | 0.2                                      | 0.000 69                     | 0.38               | 0.000 094                    | 0.92               |
| Re      | 187     | 0.000 11                     | 0.000 044                    | ReO                     | 203              | 0.4                                      | 0.000 39                     | 0.28               | 0.000 054                    | 0.82               |
| Os      | 189     | 0.000 26                     | 0.000 051                    | OsO                     | 205              | 0.4                                      | 0.001 3                      | 0.20               | 0.000 40                     | 0.13               |
| Ir      | 193     | 0.000 42                     | 0.000 46                     | IrO                     | 209              | 0.5                                      | 0.002 5                      | 0.17               | 0.001 3                      | 0.36               |
| Pt      | 195     | 0.001 4                      | 0.000 85                     | PtO                     | 211              | 0.6                                      | 0.031                        | 0.045              | 0.004 3                      | 0.20               |
| Au      | 197     | 0.002 0                      | 0.004 4                      | AuO                     | 213              | 0.4                                      | 0.30                         | 0.006 5            | 0.041                        | 0.11               |
| Pb      | 208     | 0.000 15                     | 0.000 020                    | PbO                     | 224              | 0.5                                      | 0.50                         | 0.000 30           | 0.067                        | 0.000 30           |
| Bi      | 209     | 0.000 049                    | 0.000 067                    | BiO                     | 225              | 0.7                                      | 0.020                        | 0.002 5            | 0.002 7                      | 0.002 5            |
| Th      | 232     | 0.000 084                    | 0.000 026                    | ThO                     | 248              | 0.2                                      | 0.000 16                     | 0.52               | 0.000 022                    | 1.2                |
| U       | 238     | 0.000 063                    | 0.000 014                    | UO                      | 254              | 0.1                                      | 0.000 33                     | 0.19               | 0.000 065                    | 0.21               |

Table S6: Comparison of determined limit of detection (LOD) and background equivalence concentration (BEC) for standard mode and on-mass determinations with N<sub>2</sub>O using a Perkin Elmer NexION 5000. LODs were calculated based on 3 times the standard deviation of the blank and expressed in ng g<sup>-1</sup>. BECs were calculated by division of the blank signal with the calibration slope and expressed in ng g<sup>-1</sup>. Improvement in LOD and BEC are given as a factor of how much lower these parameters are when compared to standard mode. Values are presented to 2 significant figures.

| Element | Isotope | Standard Mode             |                           | Gas Flow Rate (mL min <sup>-1</sup> ) | N <sub>2</sub> O DRC Mode |                 |                           |                 |
|---------|---------|---------------------------|---------------------------|---------------------------------------|---------------------------|-----------------|---------------------------|-----------------|
|         |         | LOD (ng g <sup>-1</sup> ) | BEC (ng g <sup>-1</sup> ) |                                       | LOD (ng g <sup>-1</sup> ) | LOD Improvement | BEC (ng g <sup>-1</sup> ) | BEC Improvement |
| Na      | 23      | 0.12                      | 4.4                       | 0.4                                   | 0.23                      | 0.53            | 3.9                       | 1.1             |
| Al      | 27      | 0.001 6                   | 0.019                     | 0.3                                   | 0.003 9                   | 0.41            | 0.017                     | 1.1             |
| K       | 39      | 0.88                      | 32                        | 0.5                                   | 0.037                     | 23              | 3.6                       | 9.1             |
| Cr      | 52      | 0.15                      | 10                        | 0.3                                   | 0.000 80                  | 180             | 0.001 8                   | 5600            |
| Mn      | 55      | 0.001 3                   | 0.015                     | 0.4                                   | 0.000 31                  | 4.2             | 0.000 94                  | 16              |
| Fe      | 57      | 3.5                       | 65                        | 0.2                                   | 0.058                     | 60              | 0.53                      | 120             |
| Co      | 59      | 0.000 79                  | 0.004 8                   | 0.3                                   | 0.000 52                  | 1.5             | 0.001 2                   | 4.0             |
| Ni      | 60      | 0.002 1                   | 0.007 9                   | 0.3                                   | 0.002 3                   | 0.92            | 0.006 3                   | 1.3             |
| Cu      | 63      | 0.000 50                  | 0.005 2                   | 0.3                                   | 0.000 62                  | 0.81            | 0.003 4                   | 1.5             |
| Zn      | 66      | 0.004                     | 0.019                     | 0.4                                   | 0.004 2                   | 0.96            | 0.023                     | 0.85            |
| Ga      | 69      | 0.000 63                  | 0.001 3                   | 0.5                                   | 0.000 92                  | 0.69            | 0.000 90                  | 1.5             |
| Se      | 82      | 0.036                     | 0.16                      | 0.5                                   | 0.010                     | 3.6             | 0.006 4                   | 25              |
| Rb      | 85      | 0.000 43                  | 0.001 5                   | 0.5                                   | 0.000 36                  | 1.2             | 0.001 6                   | 0.96            |
| Mo      | 98      | 0.000 33                  | 0.000 25                  | 0.4                                   | 0.000 40                  | 0.81            | 0.000 28                  | 0.90            |
| Ru      | 101     | 0.001 4                   | 0.006 7                   | 0.4                                   | 0.000 38                  | 3.8             | 0.000 28                  | 24              |
| Rh      | 103     | 0.000 12                  | 0.000 17                  | 0.4                                   | 0.000 078                 | 1.6             | 0.000 087                 | 2.0             |
| Pd      | 105     | 0.000 29                  | 0.000 38                  | 0.4                                   | 0.000 23                  | 1.2             | 0.000 15                  | 2.6             |
| Ag      | 107     | 0.000 51                  | 0.001 7                   | 0.5                                   | 0.000 97                  | 0.53            | 0.001 4                   | 1.2             |
| Cd      | 114     | 0.000 26                  | 0.000 23                  | 0.6                                   | 0.000 43                  | 0.61            | 0.000 22                  | 1.0             |
| In      | 115     | 0.000 037                 | 0.000 009                 | 0.6                                   | 0.000 052                 | 0.71            | 0.000 011                 | 0.81            |
| Sn      | 118     | 0.000 34                  | 0.000 50                  | 0.5                                   | 0.000 70                  | 0.48            | 0.000 42                  | 1.2             |
| Sb      | 121     | 0.000 72                  | 0.000 96                  | 0.5                                   | 0.000 41                  | 1.8             | 0.000 20                  | 4.7             |
| Te      | 128     | 0.004 8                   | 0.014                     | 0.7                                   | 0.004 9                   | 1.0             | 0.013                     | 1.1             |
| I       | 127     | 0.016                     | 0.71                      | 0.6                                   | 0.025                     | 0.63            | 0.93                      | 0.77            |
| Cs      | 133     | 0.000 098                 | 0.000 088                 | 0.6                                   | 0.000 22                  | 0.46            | 0.000 052                 | 1.7             |
| Tm      | 169     | 0.000 11                  | 0.000 078                 | 0.5                                   | 0.000 30                  | 0.37            | 0.000 11                  | 0.72            |
| Yb      | 174     | 0.000 16                  | 0.000 067                 | 0.6                                   | 0.000 18                  | 0.90            | 0.000 039                 | 1.7             |
| Re      | 187     | 0.000 11                  | 0.000 044                 | 0.8                                   | 0.000 10                  | 1.1             | 0.000 020                 | 2.2             |
| Au      | 197     | 0.002 0                   | 0.004 4                   | 0.6                                   | 0.000 77                  | 2.6             | 0.000 39                  | 11              |
| Hg      | 202     | 0.006 0                   | 0.006 1                   | 0.8                                   | 0.004 5                   | 1.3             | 0.001 1                   | 5.7             |
| Tl      | 205     | 0.000 46                  | 0.000 31                  | 0.8                                   | 0.000 83                  | 0.56            | 0.000 79                  | 0.40            |
| Pb      | 208     | 0.000 15                  | 0.000 020                 | 0.8                                   | 0.000 078                 | 1.9             | 0.000 27                  | 0.076           |
| Bi      | 209     | 0.000 049                 | 0.000 007                 | 0.9                                   | 0.000 092                 | 0.53            | 0.000 047                 | 0.14            |

Table S7: Maximum obtained formation of product ions resulting from charge transfer reactions for selected elements. Flow rates of N<sub>2</sub>O provided are at the optimum formation using a Perkin Elmer NexION 5000.

| Element | Isotope | NO <sup>+</sup> ( <i>m/z</i> = 30) |                                   | O <sub>2</sub> <sup>+</sup> ( <i>m/z</i> = 32) |                                   | N <sub>2</sub> O <sup>+</sup> ( <i>m/z</i> = 44) |                                   |
|---------|---------|------------------------------------|-----------------------------------|------------------------------------------------|-----------------------------------|--------------------------------------------------|-----------------------------------|
|         |         | Formation (%)                      | Flow Rate (mL min <sup>-1</sup> ) | Formation (%)                                  | Flow Rate (mL min <sup>-1</sup> ) | Formation (%)                                    | Flow Rate (mL min <sup>-1</sup> ) |
| Be      | 9       | 0.28                               | 0.4                               | 0.01                                           | 0.7                               | 0.12                                             | 0.9                               |
| B       | 11      | 5.5                                | 0.4                               | 3.2                                            | 1.2                               | 19                                               | 0.3                               |
| Al      | 27      | 0.01                               | 1.1                               | <0.01                                          | -                                 | 0.01                                             | 0.2                               |
| Si      | 29      | 7.3                                | 0.3                               | 28                                             | 0.7                               | 23                                               | 0.4                               |
| P       | 31      | 16                                 | 0.4                               | 1.9                                            | 0.9                               | 12                                               | 0.3                               |
| S       | 34      | 12                                 | 0.5                               | 6.2                                            | 1.3                               | 5.5                                              | 0.4                               |
| Cl      | 35      | 0.88                               | 0.1                               | 0.76                                           | 0.5                               | 50                                               | 0.1                               |
| Ge      | 74      | <0.01                              | -                                 | <0.01                                          | -                                 | 0.19                                             | 0.2                               |
| As      | 75      | 0.04                               | 0.2                               | <0.01                                          | -                                 | 0.57                                             | 0.2                               |
| Se      | 82      | 0.02                               | 0.2                               | <0.01                                          | -                                 | 0.12                                             | 0.1                               |
| Br      | 81      | 0.07                               | 0.1                               | <0.01                                          | -                                 | 0.60                                             | 0.1                               |
