# Supplementary material for: Characterisation of gas cell reactions for 70+ elements using N2O for ICP tandem mass spectrometry measurements
Source: Royal Society of Chemistry journal article supplement (doi:10.1039/d3ja00025g), 2023-01-01
Supplement: d3ja00025g2.pdf [file d3ja00025g2.pdf]

Electronic Supplementary Material (ESI) for JAAS.  
Supplemental Information to Characterization of gas cell reactions for 70+ elements using N<sub>2</sub>O for ICP tandem mass spectrometry measurements

Shaun T. Lancaster<sup>a\*</sup>, Thomas Prohaska<sup>ab</sup> and Johanna Irrgeher<sup>ab</sup>

<sup>a</sup>Department of General, Analytical and Physical Chemistry, Chair of General and Analytical Chemistry, Montanuniversität Leoben, Leoben, Austria.

<sup>b</sup>Department of Physics and Astronomy, University of Calgary, Calgary, Canada.

|           |           |           |           |           |           |           |           |           |           |           |           |           |           |           |           |           |           |
|-----------|-----------|-----------|-----------|-----------|-----------|-----------|-----------|-----------|-----------|-----------|-----------|-----------|-----------|-----------|-----------|-----------|-----------|
| <b>H</b>  |           |           |           |           |           |           |           |           |           |           |           |           |           |           |           |           | <b>He</b> |
| <u>Li</u> | <u>Be</u> |           |           |           |           |           |           |           |           |           |           | <u>B</u>  | <b>C</b>  | <b>N</b>  | <b>O</b>  | <b>F</b>  | <b>Ne</b> |
| <u>Na</u> | <u>Mg</u> |           |           |           |           |           |           |           |           |           |           | <u>Al</u> | <u>Si</u> | <u>P</u>  | <u>S</u>  | <u>Cl</u> | <b>Ar</b> |
| <u>K</u>  | <u>Ca</u> | <u>Sc</u> | <u>Ti</u> | <u>V</u>  | <u>Cr</u> | <u>Mn</u> | <u>Fe</u> | <u>Co</u> | <u>Ni</u> | <u>Cu</u> | <u>Zn</u> | <u>Ga</u> | <u>Ge</u> | <u>As</u> | <u>Se</u> | <u>Br</u> | <b>Kr</b> |
| <u>Rb</u> | <u>Sr</u> | <u>Y</u>  | <u>Zr</u> | <u>Nb</u> | <u>Mo</u> | <b>Tc</b> | <u>Ru</u> | <u>Rh</u> | <u>Pd</u> | <u>Ag</u> | <u>Cd</u> | <u>In</u> | <u>Sn</u> | <u>Sb</u> | <u>Te</u> | <u>I</u>  | <b>Xe</b> |
| <u>Cs</u> | <u>Ba</u> | Ln-Lu     | <u>Hf</u> | <u>Ta</u> | <u>W</u>  | <u>Re</u> | <u>Os</u> | <u>Ir</u> | <u>Pt</u> | <u>Au</u> | <u>Hg</u> | <u>Tl</u> | <u>Pb</u> | <u>Bi</u> | <b>Po</b> | <b>At</b> | <b>Rn</b> |
| <b>Fr</b> | <b>Ra</b> | Ac-Lr     | <b>Rf</b> | <b>Db</b> | <b>Sg</b> | <b>Bh</b> | <b>Hs</b> | <b>Mt</b> | <b>Ds</b> | <b>Rg</b> | <b>Cn</b> | <b>Nh</b> | <b>Fl</b> | <b>Mc</b> | <b>Lv</b> | <b>Ts</b> | <b>Og</b> |
|           |           |           | <u>La</u> | <u>Ce</u> | <u>Pr</u> | <u>Nd</u> | <b>Pm</b> | <u>Sm</u> | <u>Eu</u> | <u>Gd</u> | <u>Tb</u> | <u>Dy</u> | <u>Ho</u> | <u>Er</u> | <u>Tm</u> | <u>Yb</u> | <u>Lu</u> |
|           |           |           | <b>Ac</b> | <u>Th</u> | <b>Pa</b> | <u>U</u>  | <b>Np</b> | <b>Pu</b> | <b>Am</b> | <b>Cm</b> | <b>Bk</b> | <b>Cf</b> | <b>Es</b> | <b>Fm</b> | <b>Md</b> | <b>No</b> | <b>Lr</b> |

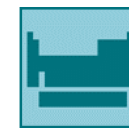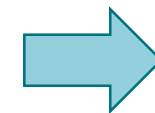

## Mass-Shift with N<sub>2</sub>O and O<sub>2</sub>

Major Product Ions of <sup>7</sup>Li<sup>+</sup> with N<sub>2</sub>O Reaction Gas

[NO ATOM TRANSFER  
REACTION OBSERVED]

Major Product Ions of <sup>7</sup>Li<sup>+</sup> with O<sub>2</sub> Reaction Gas

[NO ATOM TRANSFER  
REACTION OBSERVED]

## On-Mass with N<sub>2</sub>O and O<sub>2</sub>

On-Mass Profile of <sup>7</sup>Li<sup>+</sup> with N<sub>2</sub>O and O<sub>2</sub>

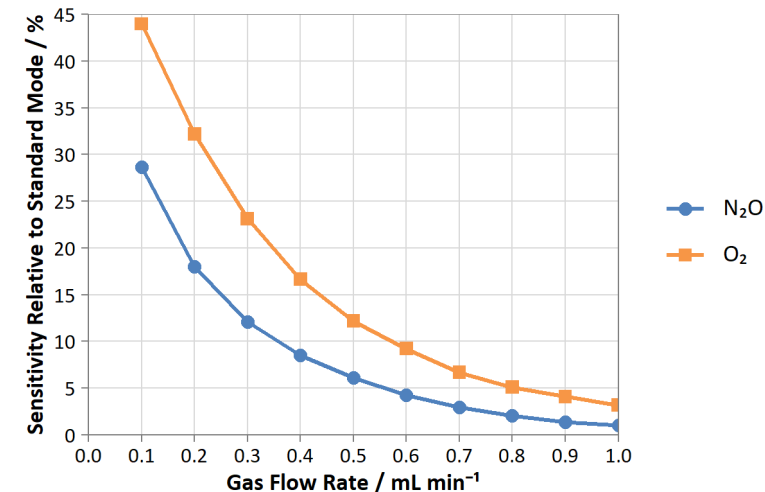

## On-Mass Removal (as Interference) with N<sub>2</sub>O

Variation of <sup>7</sup>Li<sup>16</sup>O<sup>+</sup> Interference with  
N<sub>2</sub>O Flow Rate  
(On-Mass: Q1 = 23, Q3 = 23)

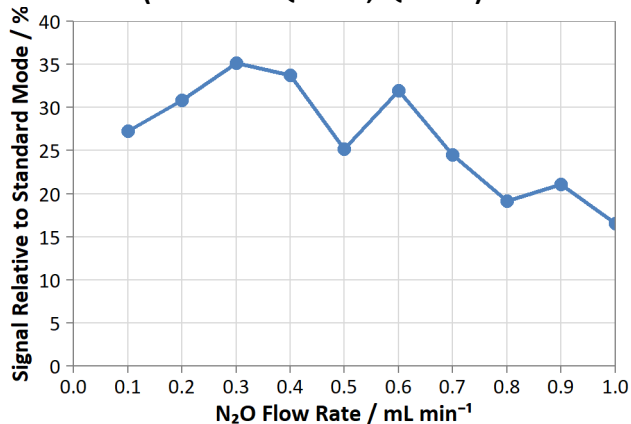

Variation of <sup>7</sup>Li<sup>2+</sup> Interference with  
N<sub>2</sub>O Flow Rate  
(On-Mass: Q1 = 3.5, Q3 = 3.5)

[INSUFFICIENT DOUBLY-CHARGED  
ION FORMATION OBSERVED]

## Asymmetric Charge Transfer (with N<sub>2</sub>O)

[NO CHARGE TRANSFER  
REACTION OBSERVED]

# Beryllium

Supplementary Information B to: Characterisation of gas cell reactions for 70+ elements using N<sub>2</sub>O for ICP tandem mass spectrometry measurements

Shaun T. Lancaster<sup>a\*</sup>, Thomas Prohaska<sup>ab</sup> and Johanna Irrgeher<sup>ab</sup>

<sup>a</sup>Department of General, Analytical and Physical Chemistry, Chair of General and Analytical Chemistry, Montanuniversität Leoben, Leoben, Austria.

<sup>b</sup>Department of Physics and Astronomy, University of Calgary, Calgary, Canada.

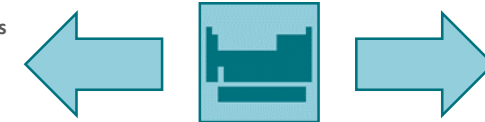

## Mass-Shift with N<sub>2</sub>O and O<sub>2</sub>

Major Product Ions of <sup>9</sup>Be<sup>+</sup> with N<sub>2</sub>O Reaction Gas

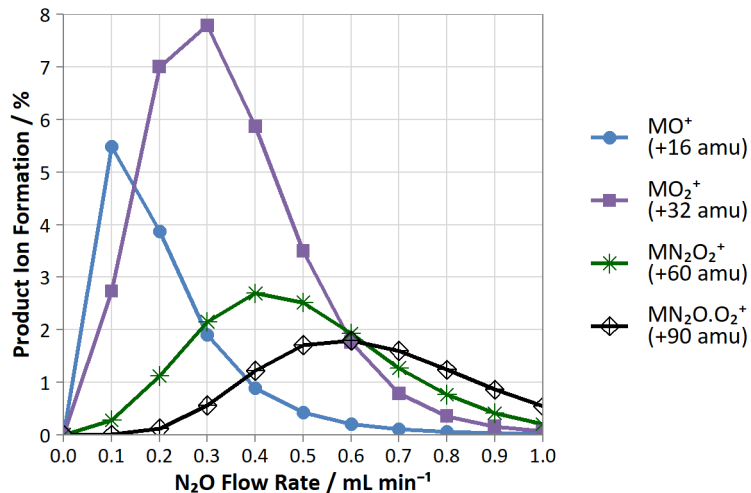

Major Product Ions of <sup>9</sup>Be<sup>+</sup> with O<sub>2</sub> Reaction Gas

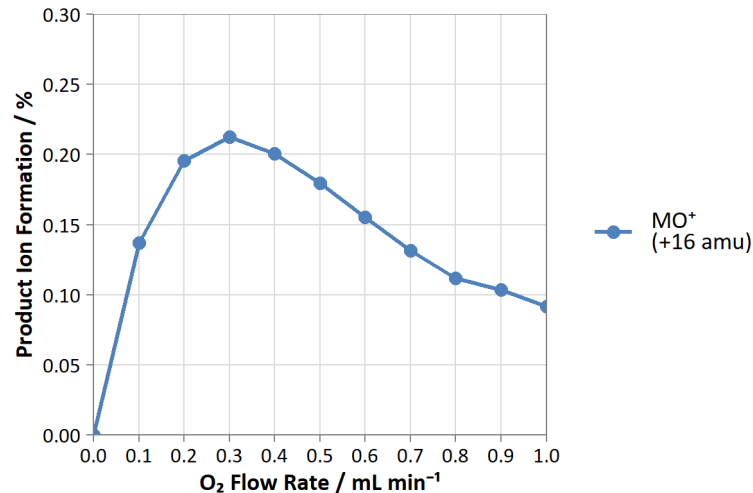

## On-Mass with N<sub>2</sub>O and O<sub>2</sub>

On-Mass Profile of <sup>9</sup>Be<sup>+</sup> with N<sub>2</sub>O and O<sub>2</sub>

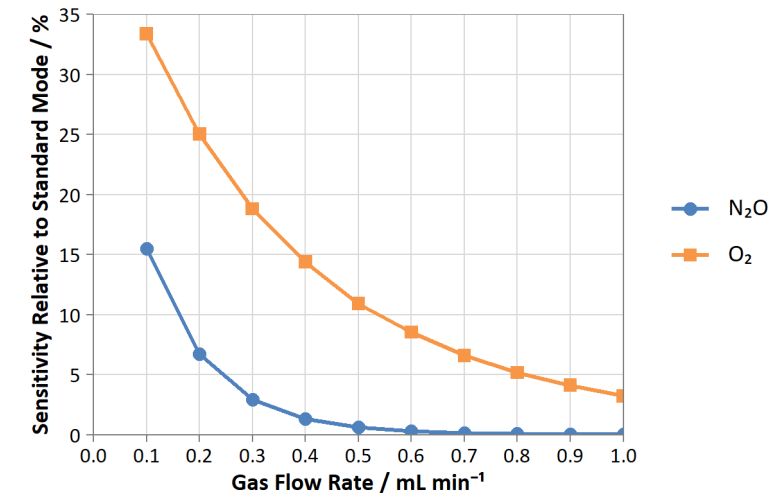

## On-Mass Removal (as Interference) with N<sub>2</sub>O

Variation of <sup>9</sup>Be<sup>16</sup>O<sup>+</sup> Interference with N<sub>2</sub>O Flow Rate (On-Mass: Q1 = 25, Q3 = 25)

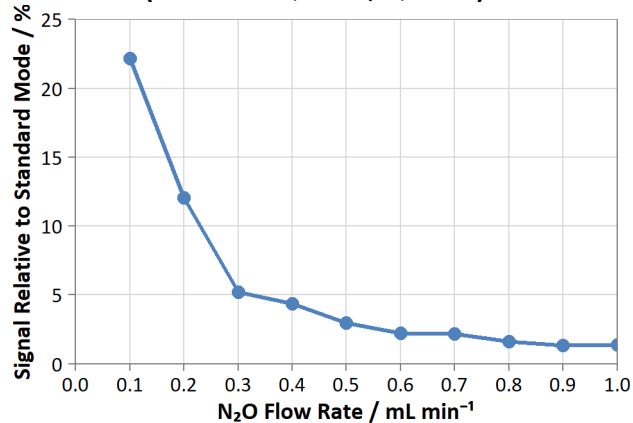

Variation of <sup>9</sup>Be<sup>2+</sup> Interference with N<sub>2</sub>O Flow Rate (On-Mass: Q1 = 4.5, Q3 = 4.5)

[INSUFFICIENT DOUBLY-CHARGED ION FORMATION OBSERVED]

## Asymmetric Charge Transfer (with N<sub>2</sub>O)

Profile of Charge Transfer Reaction Between <sup>9</sup>Be<sub>(m)</sub><sup>+</sup> and N<sub>2</sub>O

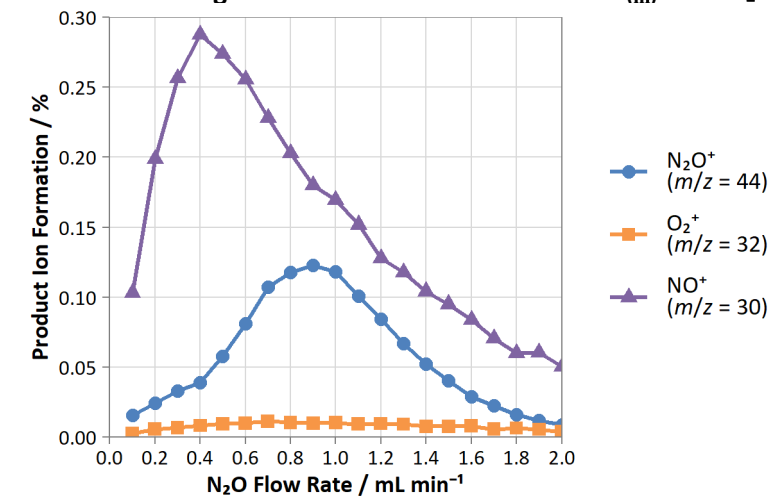

# Boron

Supplementary Information B to: Characterisation of gas cell reactions for 70+ elements using N<sub>2</sub>O for ICP tandem mass spectrometry measurements

Shaun T. Lancaster<sup>a\*</sup>, Thomas Prohaska<sup>ab</sup> and Johanna Irrgeher<sup>ab</sup>

<sup>a</sup>Department of General, Analytical and Physical Chemistry, Chair of General and Analytical Chemistry, Montanuniversität Leoben, Leoben, Austria.

<sup>b</sup>Department of Physics and Astronomy, University of Calgary, Calgary, Canada.



## Mass-Shift with N<sub>2</sub>O and O<sub>2</sub>

Major Product Ions of <sup>11</sup>B<sup>+</sup> with N<sub>2</sub>O Reaction Gas

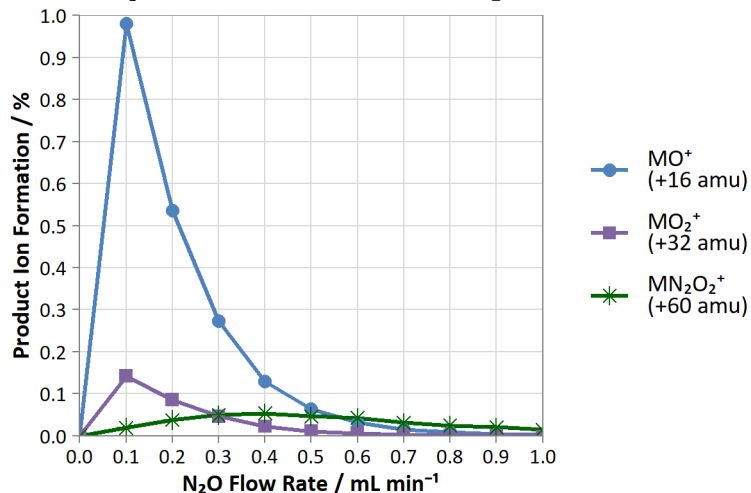

Major Product Ions of <sup>11</sup>B<sup>+</sup> with O<sub>2</sub> Reaction Gas

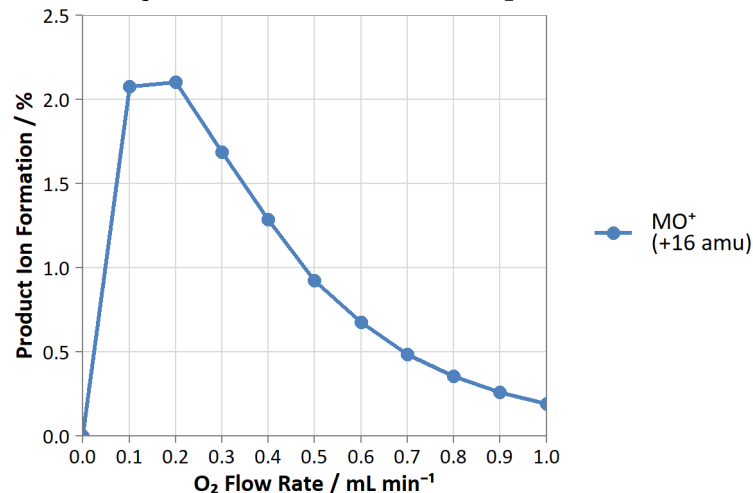

## On-Mass with N<sub>2</sub>O and O<sub>2</sub>

On-Mass Profile of <sup>11</sup>B<sup>+</sup> with N<sub>2</sub>O and O<sub>2</sub>

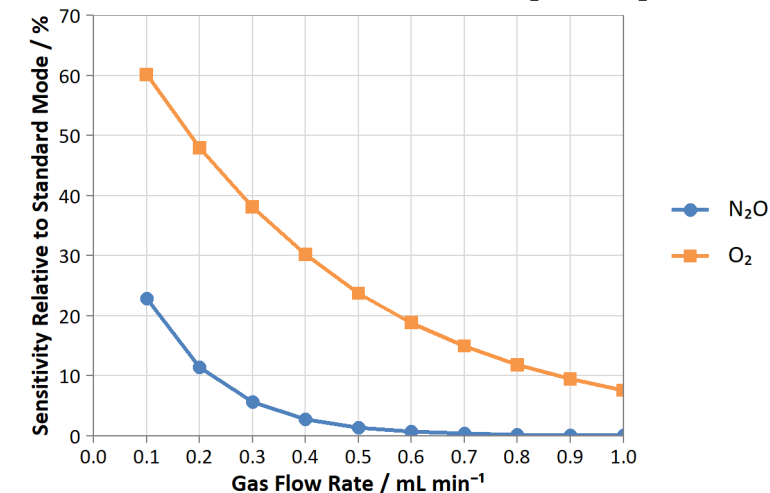

## On-Mass Removal (as Interference) with N<sub>2</sub>O

Variation of <sup>11</sup>B<sup>16</sup>O<sup>+</sup> Interference with N<sub>2</sub>O Flow Rate (On-Mass: Q1 = 27, Q3 = 27)

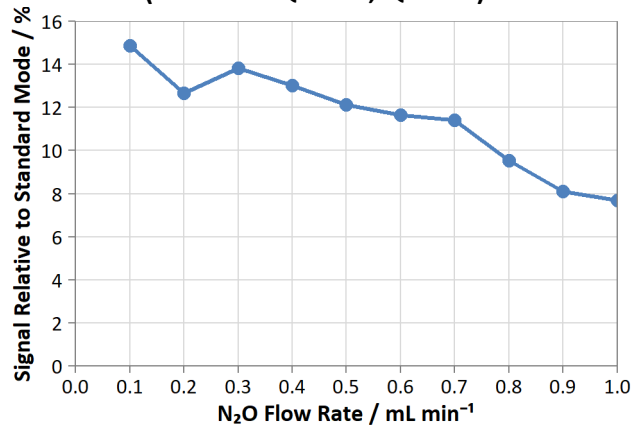

Variation of <sup>11</sup>B<sup>2+</sup> Interference with N<sub>2</sub>O Flow Rate (On-Mass: Q1 = 5.5, Q3 = 5.5)

[INSUFFICIENT DOUBLY-CHARGED ION FORMATION OBSERVED]

## Asymmetric Charge Transfer (with N<sub>2</sub>O)

Profile of Charge Transfer Reaction Between <sup>11</sup>B<sub>(m)</sub><sup>+</sup> and N<sub>2</sub>O

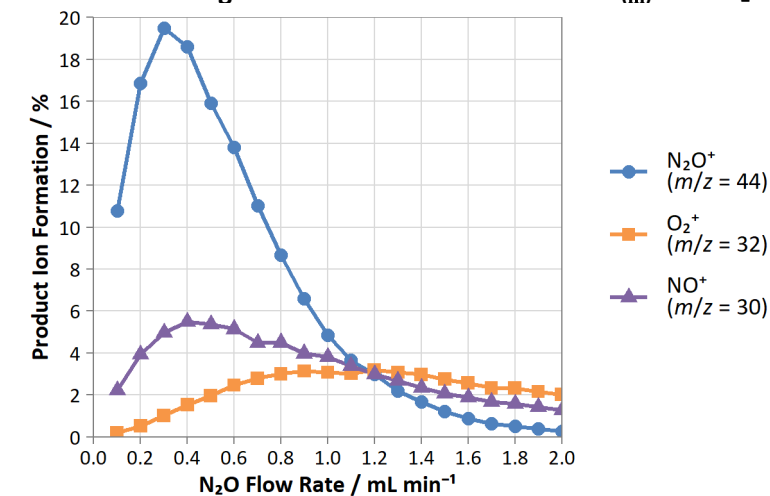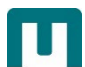

# Sodium

Supplementary Information B to: Characterisation of gas cell reactions for 70+ elements using N<sub>2</sub>O for ICP tandem mass spectrometry measurements

Shaun T. Lancaster<sup>a\*</sup>, Thomas Prohaska<sup>ab</sup> and Johanna Irrgeher<sup>ab</sup>

<sup>a</sup>Department of General, Analytical and Physical Chemistry, Chair of General and Analytical Chemistry, Montanuniversität Leoben, Leoben, Austria.

<sup>b</sup>Department of Physics and Astronomy, University of Calgary, Calgary, Canada.

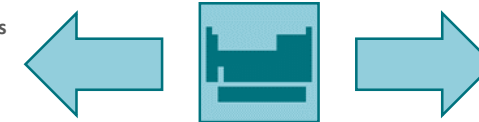

## Mass-Shift with N<sub>2</sub>O and O<sub>2</sub>

Major Product Ions of <sup>23</sup>Na<sup>+</sup> with N<sub>2</sub>O Reaction Gas

[NO ATOM TRANSFER  
REACTION OBSERVED]

Major Product Ions of <sup>23</sup>Na<sup>+</sup> with O<sub>2</sub> Reaction Gas

[NO ATOM TRANSFER  
REACTION OBSERVED]

## On-Mass with N<sub>2</sub>O and O<sub>2</sub>

On-Mass Profile of <sup>23</sup>Na<sup>+</sup> with N<sub>2</sub>O and O<sub>2</sub>

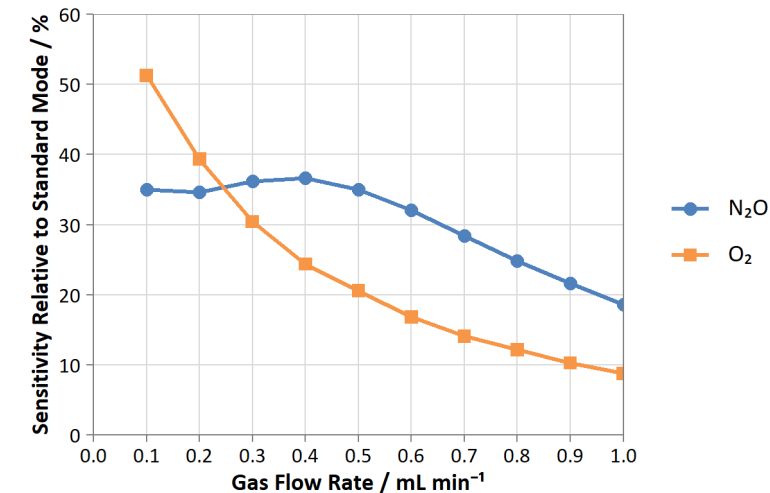

## On-Mass Removal (as Interference) with N<sub>2</sub>O

Variation of <sup>23</sup>Na<sup>16</sup>O<sup>+</sup> Interference with  
N<sub>2</sub>O Flow Rate  
(On-Mass: Q1 = 39, Q3 = 39)

[INSUFFICIENT OXIDE  
FORMATION OBSERVED]

Variation of <sup>23</sup>Na<sup>2+</sup> Interference with  
N<sub>2</sub>O Flow Rate  
(On-Mass: Q1 = 11.5, Q3 = 11.5)

[INSUFFICIENT DOUBLY-CHARGED  
ION FORMATION OBSERVED]

## Asymmetric Charge Transfer (with N<sub>2</sub>O)

[NO CHARGE TRANSFER  
REACTION OBSERVED]

# Magnesium

Supplementary Information B to: Characterisation of gas cell reactions for 70+ elements using N<sub>2</sub>O for ICP tandem mass spectrometry measurements

Shaun T. Lancaster<sup>a\*</sup>, Thomas Prohaska<sup>ab</sup> and Johanna Irrgeher<sup>ab</sup>

<sup>a</sup>Department of General, Analytical and Physical Chemistry, Chair of General and Analytical Chemistry, Montanuniversität Leoben, Leoben, Austria.

<sup>b</sup>Department of Physics and Astronomy, University of Calgary, Calgary, Canada.

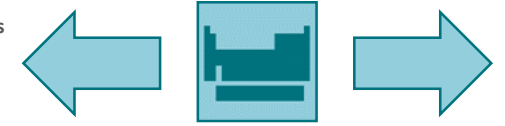

## Mass-Shift with N<sub>2</sub>O and O<sub>2</sub>

Major Product Ions of <sup>24</sup>Mg<sup>+</sup> with N<sub>2</sub>O Reaction Gas

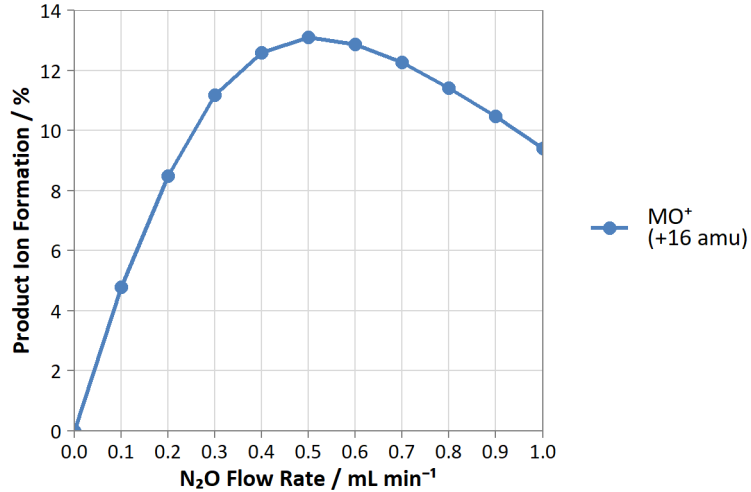

Major Product Ions of <sup>24</sup>Mg<sup>+</sup> with O<sub>2</sub> Reaction Gas

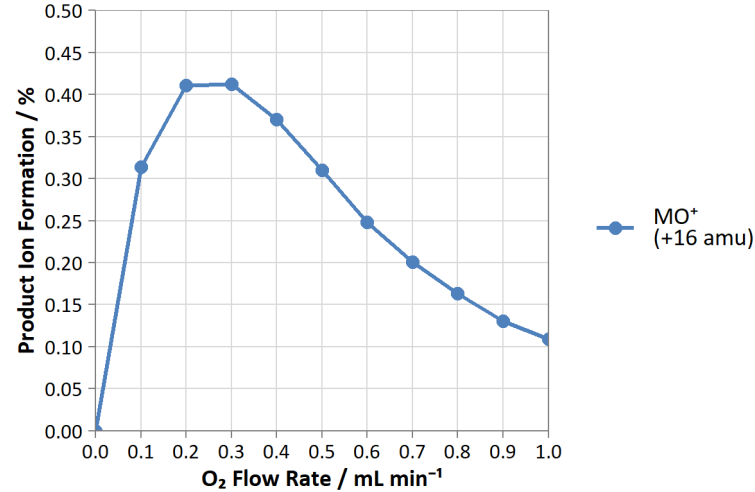

## On-Mass with N<sub>2</sub>O and O<sub>2</sub>

On-Mass Profile of <sup>24</sup>Mg<sup>+</sup> with N<sub>2</sub>O and O<sub>2</sub>

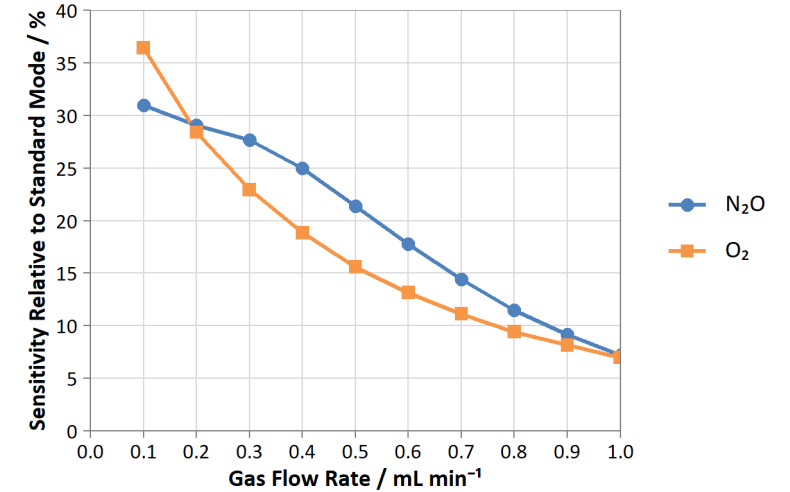

## On-Mass Removal (as Interference) with N<sub>2</sub>O

Variation of <sup>24</sup>Mg<sup>16</sup>O<sup>+</sup> Interference with N<sub>2</sub>O Flow Rate  
(On-Mass: Q1 = 40, Q3 = 40)

[NOT MEASURED]

Variation of <sup>24</sup>Mg<sup>2+</sup> Interference with N<sub>2</sub>O Flow Rate  
(On-Mass: Q1 = 12, Q3 = 12)

[INSUFFICIENT DOUBLY-CHARGED ION FORMATION OBSERVED]

## Asymmetric Charge Transfer (with N<sub>2</sub>O)

[NO CHARGE TRANSFER REACTION OBSERVED]

# Aluminium

Supplementary Information B to: Characterisation of gas cell reactions for 70+ elements using N<sub>2</sub>O for ICP tandem mass spectrometry measurements

Shaun T. Lancaster<sup>a\*</sup>, Thomas Prohaska<sup>ab</sup> and Johanna Irrgeher<sup>ab</sup>

<sup>a</sup>Department of General, Analytical and Physical Chemistry, Chair of General and Analytical Chemistry, Montanuniversität Leoben, Leoben, Austria.

<sup>b</sup>Department of Physics and Astronomy, University of Calgary, Calgary, Canada.



## Mass-Shift with N<sub>2</sub>O and O<sub>2</sub>

Major Product Ions of <sup>27</sup>Al<sup>+</sup> with N<sub>2</sub>O Reaction Gas

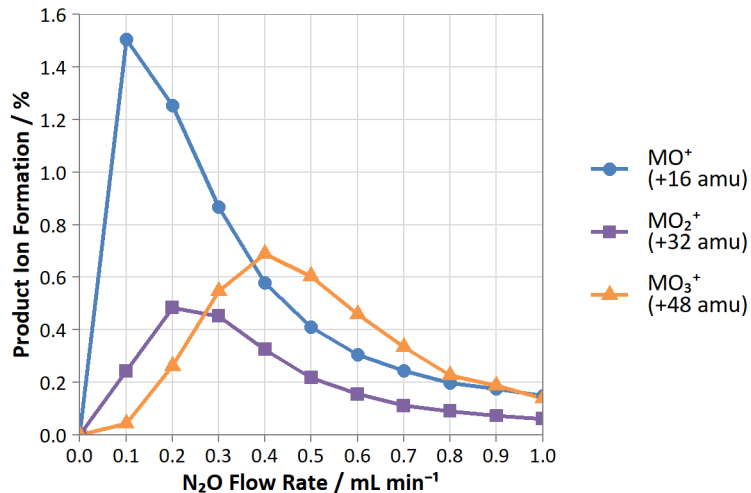

Major Product Ions of <sup>27</sup>Al<sup>+</sup> with O<sub>2</sub> Reaction Gas

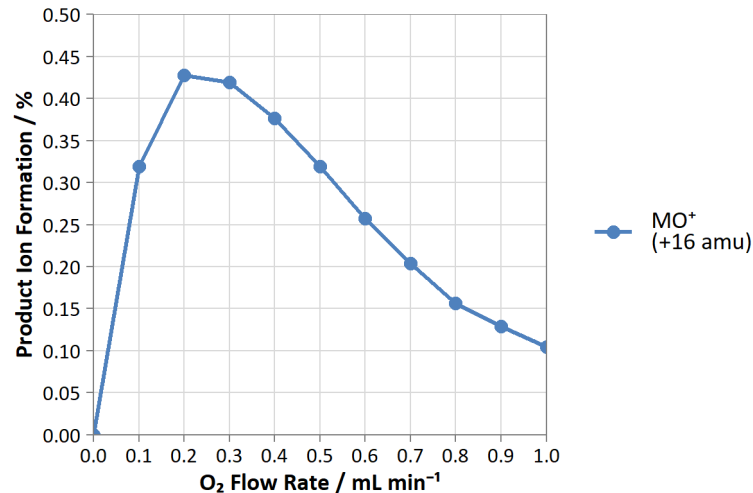

## On-Mass with N<sub>2</sub>O and O<sub>2</sub>

On-Mass Profile of <sup>27</sup>Al<sup>+</sup> with N<sub>2</sub>O and O<sub>2</sub>

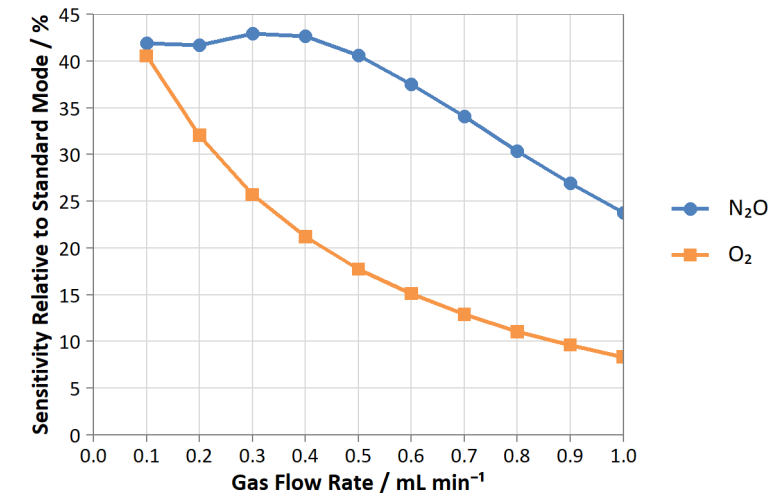

## On-Mass Removal (as Interference) with N<sub>2</sub>O

Variation of <sup>27</sup>Al<sup>16</sup>O<sup>+</sup> Interference with N<sub>2</sub>O Flow Rate (On-Mass: Q1 = 43, Q3 = 43)

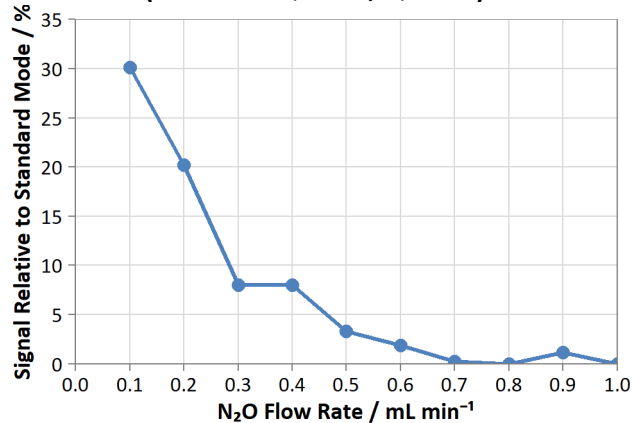

Variation of <sup>27</sup>Al<sup>2+</sup> Interference with N<sub>2</sub>O Flow Rate (On-Mass: Q1 = 13.5, Q3 = 13.5)

[INSUFFICIENT DOUBLY-CHARGED ION FORMATION OBSERVED]

## Asymmetric Charge Transfer (with N<sub>2</sub>O)

Profile of Charge Transfer Reaction Between <sup>27</sup>Al<sub>(m)</sub><sup>+</sup> and N<sub>2</sub>O

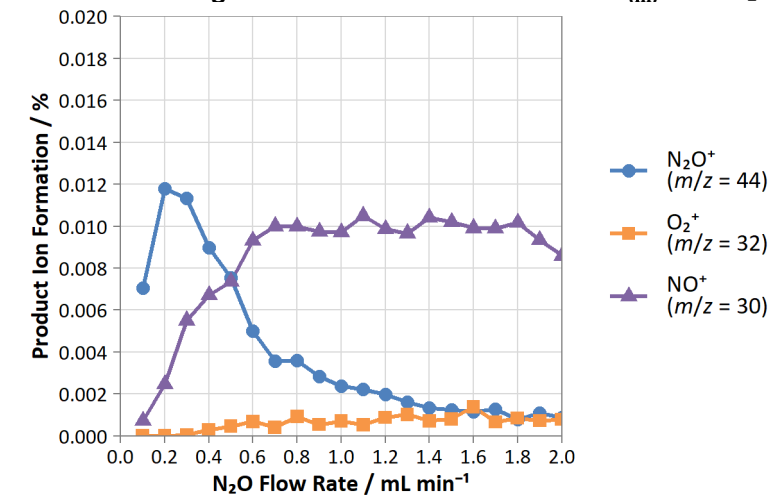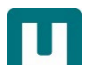



## Mass-Shift with N<sub>2</sub>O and O<sub>2</sub>

Major Product Ions of <sup>29</sup>Si<sup>+</sup> with N<sub>2</sub>O Reaction Gas

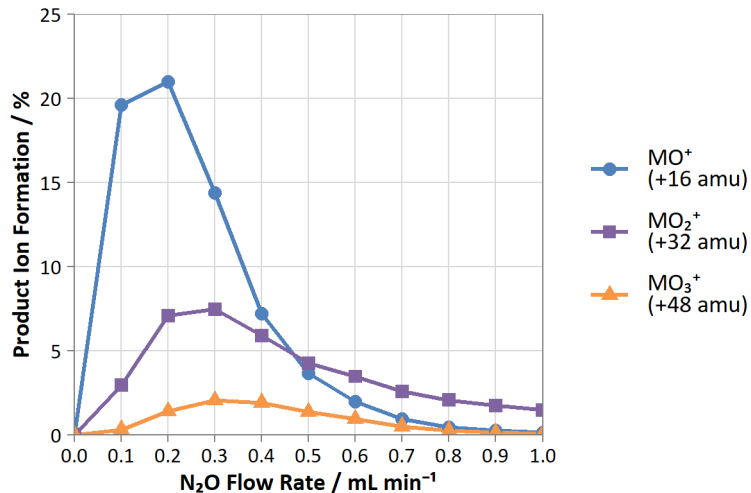

Major Product Ions of <sup>29</sup>Si<sup>+</sup> with O<sub>2</sub> Reaction Gas

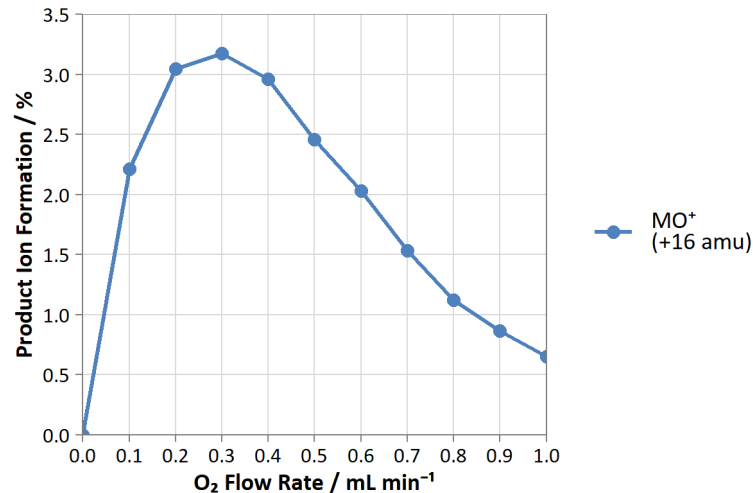

## On-Mass with N<sub>2</sub>O and O<sub>2</sub>

On-Mass Profile of <sup>29</sup>Si<sup>+</sup> with N<sub>2</sub>O and O<sub>2</sub>

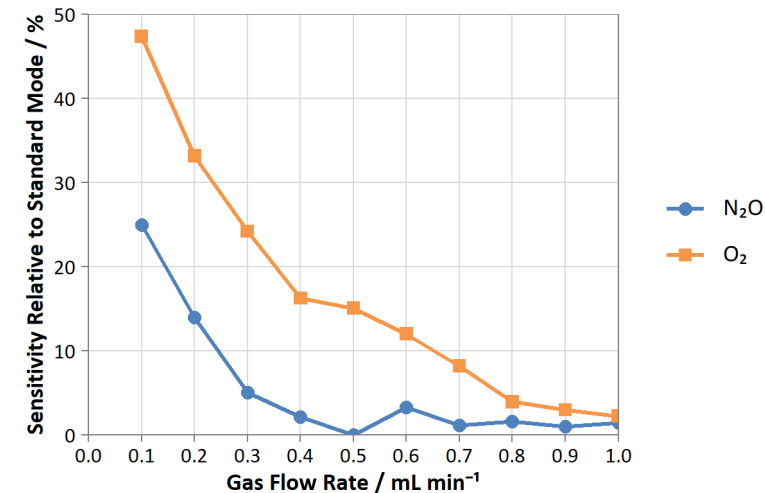

## On-Mass Removal (as Interference) with N<sub>2</sub>O

Variation of <sup>29</sup>Si<sup>16</sup>O<sup>+</sup> Interference with N<sub>2</sub>O Flow Rate (On-Mass: Q1 = 45, Q3 = 45)

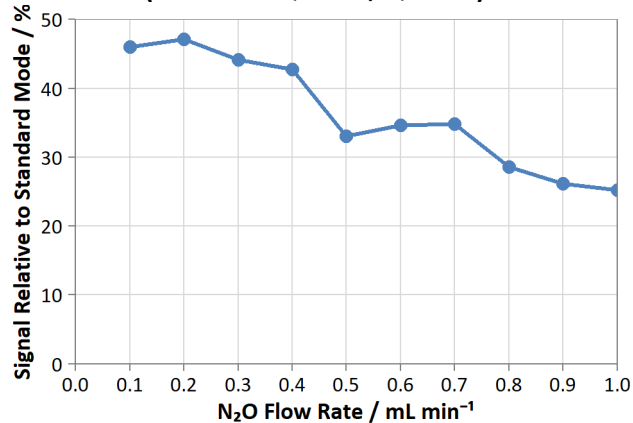

Variation of <sup>29</sup>Si<sup>2+</sup> Interference with N<sub>2</sub>O Flow Rate (On-Mass: Q1 = 14.5, Q3 = 14.5)

[INSUFFICIENT DOUBLY-CHARGED ION FORMATION OBSERVED]

## Asymmetric Charge Transfer (with N<sub>2</sub>O)

Profile of Charge Transfer Reaction Between <sup>29</sup>Si<sub>(m)</sub><sup>+</sup> and N<sub>2</sub>O

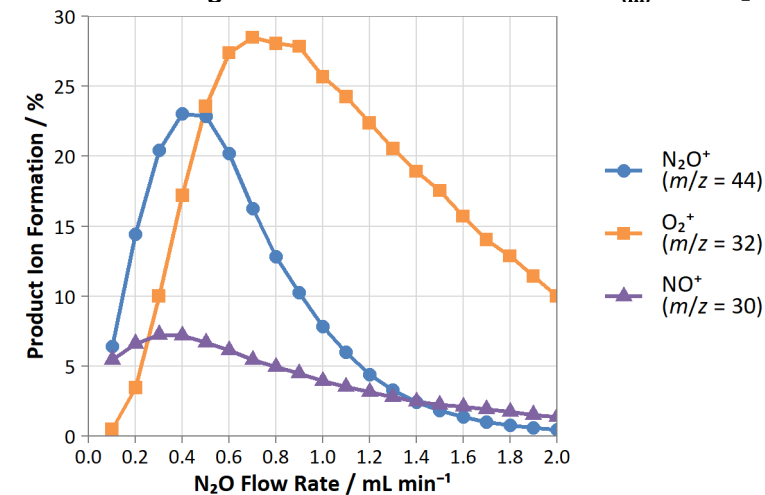



# Phosphorus

Supplementary Information B to: Characterisation of gas cell reactions for 70+ elements using N<sub>2</sub>O for ICP tandem mass spectrometry measurements

Shaun T. Lancaster<sup>a\*</sup>, Thomas Prohaska<sup>ab</sup> and Johanna Irrgeher<sup>ab</sup>

<sup>a</sup>Department of General, Analytical and Physical Chemistry, Chair of General and Analytical Chemistry, Montanuniversität Leoben, Leoben, Austria.

<sup>b</sup>Department of Physics and Astronomy, University of Calgary, Calgary, Canada.

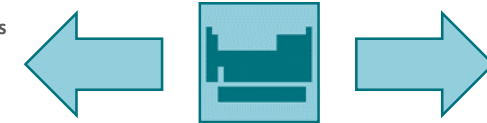

## Mass-Shift with N<sub>2</sub>O and O<sub>2</sub>

Major Product Ions of <sup>31</sup>P<sup>+</sup> with N<sub>2</sub>O Reaction Gas

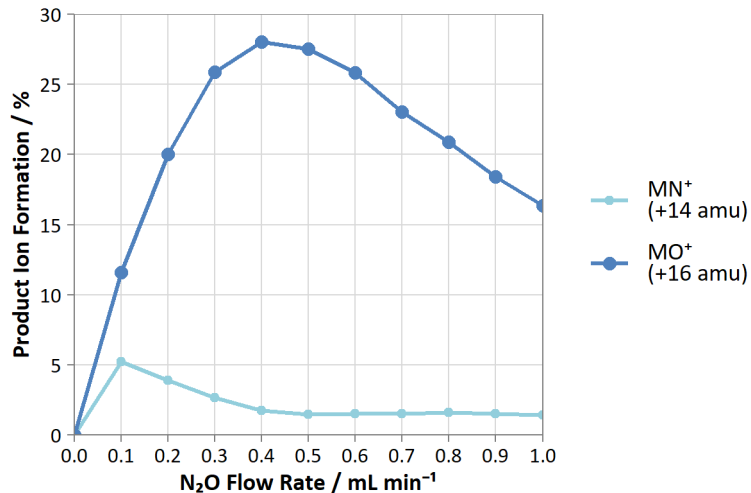

Major Product Ions of <sup>31</sup>P<sup>+</sup> with O<sub>2</sub> Reaction Gas

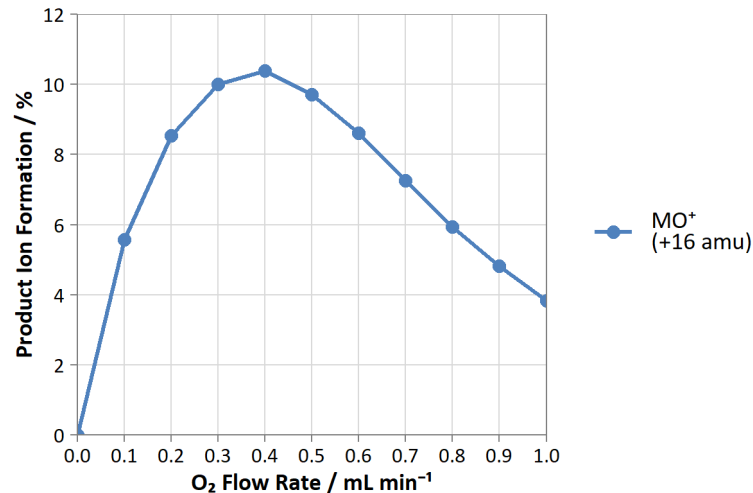

## On-Mass with N<sub>2</sub>O and O<sub>2</sub>

On-Mass Profile of <sup>31</sup>P<sup>+</sup> with N<sub>2</sub>O and O<sub>2</sub>

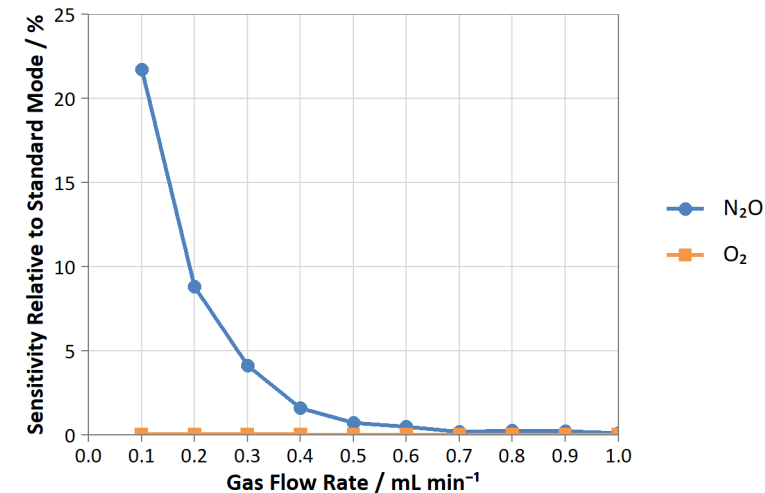

## On-Mass Removal (as Interference) with N<sub>2</sub>O

Variation of <sup>31</sup>P<sup>16</sup>O<sup>+</sup> Interference with N<sub>2</sub>O Flow Rate (On-Mass: Q1 = 47, Q3 = 47)

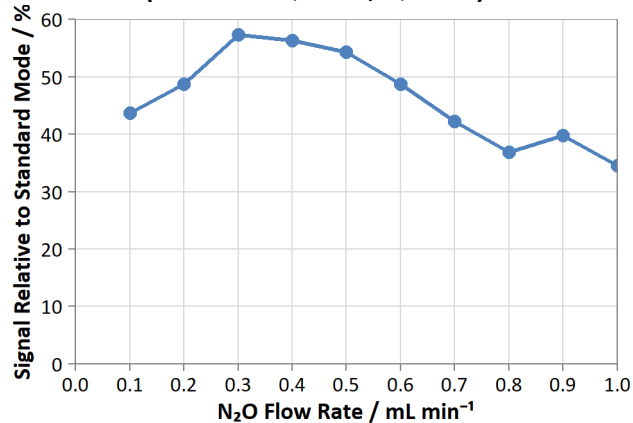

Variation of <sup>31</sup>P<sup>2+</sup> Interference with N<sub>2</sub>O Flow Rate (On-Mass: Q1 = 15.5, Q3 = 15.5)

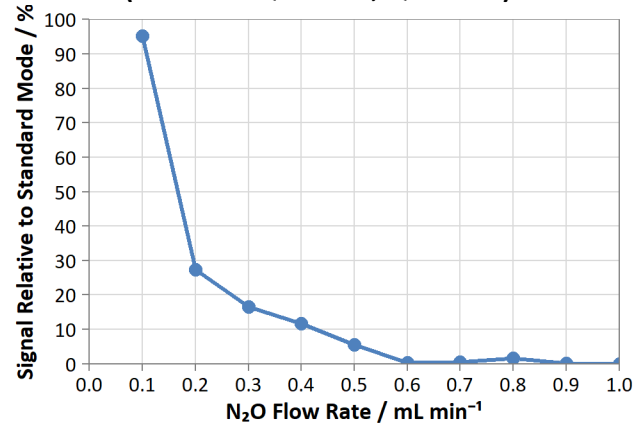

## Asymmetric Charge Transfer (with N<sub>2</sub>O)

Profile of Charge Transfer Reaction Between <sup>31</sup>P<sub>(m)</sub><sup>+</sup> and N<sub>2</sub>O

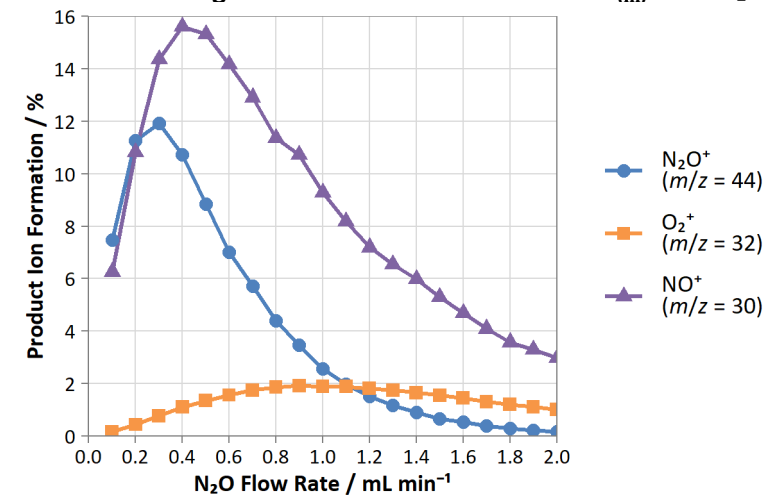

# Sulphur

Supplementary Information B to: Characterisation of gas cell reactions for 70+ elements using N<sub>2</sub>O for ICP tandem mass spectrometry measurements

Shaun T. Lancaster<sup>a\*</sup>, Thomas Prohaska<sup>ab</sup> and Johanna Irrgeher<sup>ab</sup>

<sup>a</sup>Department of General, Analytical and Physical Chemistry, Chair of General and Analytical Chemistry, Montanuniversität Leoben, Leoben, Austria.

<sup>b</sup>Department of Physics and Astronomy, University of Calgary, Calgary, Canada.



## Mass-Shift with N<sub>2</sub>O and O<sub>2</sub>

Major Product Ions of <sup>34</sup>S<sup>+</sup> with N<sub>2</sub>O Reaction Gas

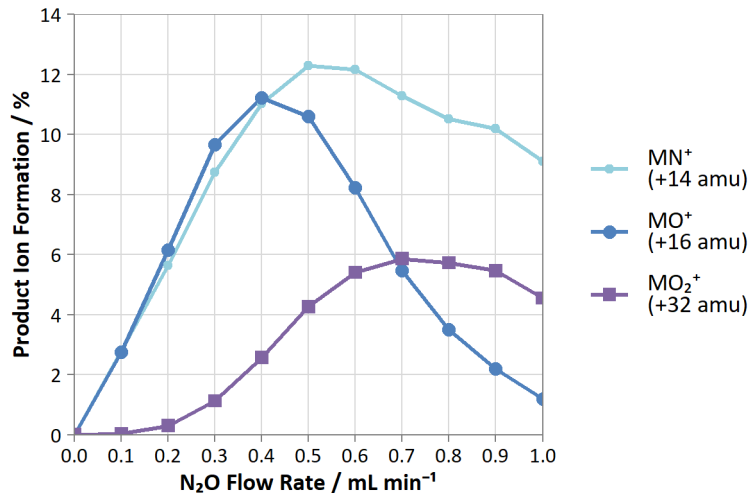

Major Product Ions of <sup>34</sup>S<sup>+</sup> with O<sub>2</sub> Reaction Gas

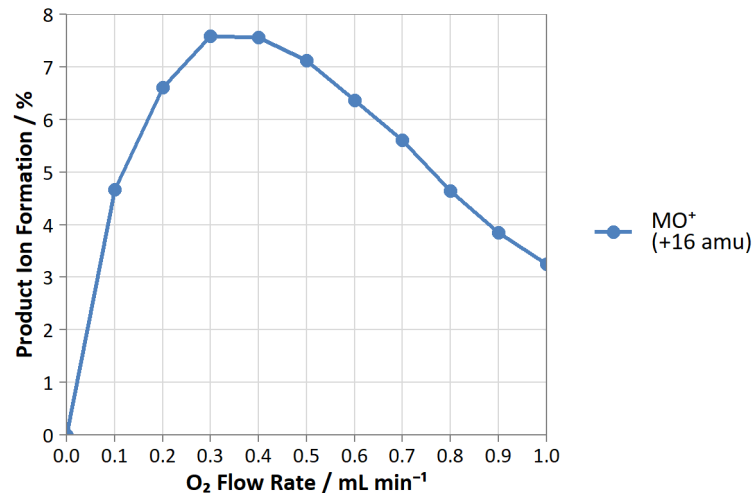

## On-Mass with N<sub>2</sub>O and O<sub>2</sub>

On-Mass Profile of <sup>34</sup>S<sup>+</sup> with N<sub>2</sub>O and O<sub>2</sub>

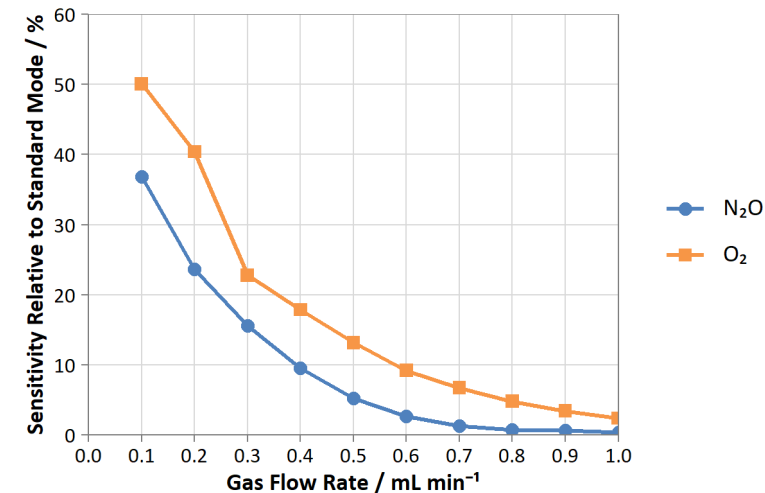

## On-Mass Removal (as Interference) with N<sub>2</sub>O

Variation of <sup>34</sup>S<sup>16</sup>O<sup>+</sup> Interference with N<sub>2</sub>O Flow Rate (On-Mass: Q1 = 50, Q3 = 50)

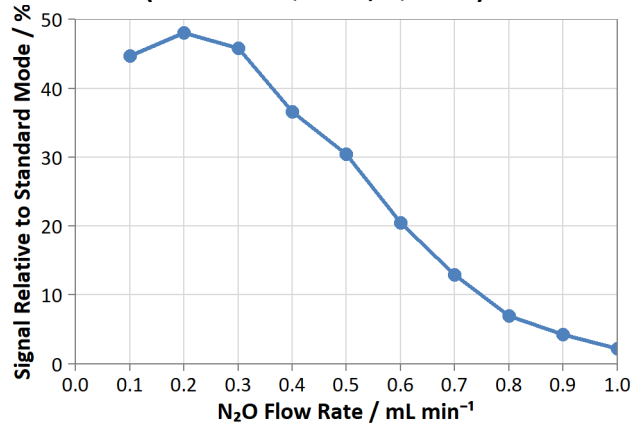

Variation of <sup>34</sup>S<sup>2+</sup> Interference with N<sub>2</sub>O Flow Rate (On-Mass: Q1 = 17, Q3 = 17)

[NOT MEASURED]

## Asymmetric Charge Transfer (with N<sub>2</sub>O)

Profile of Charge Transfer Reaction Between <sup>34</sup>S<sub>(m)</sub><sup>+</sup> and N<sub>2</sub>O

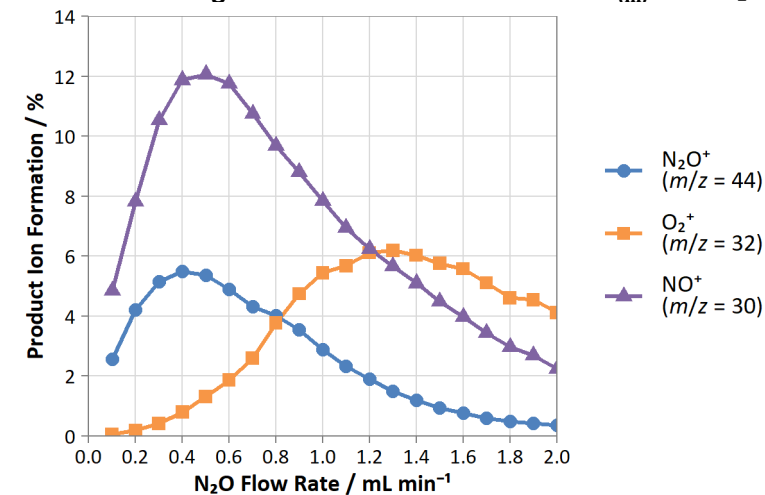

# Chlorine

Supplementary Information B to: Characterisation of gas cell reactions for 70+ elements using N<sub>2</sub>O for ICP tandem mass spectrometry measurements

Shaun T. Lancaster<sup>a\*</sup>, Thomas Prohaska<sup>ab</sup> and Johanna Irrgeher<sup>ab</sup>

<sup>a</sup>Department of General, Analytical and Physical Chemistry, Chair of General and Analytical Chemistry, Montanuniversität Leoben, Leoben, Austria.

<sup>b</sup>Department of Physics and Astronomy, University of Calgary, Calgary, Canada.



## Mass-Shift with N<sub>2</sub>O and O<sub>2</sub>

Major Product Ions of <sup>35</sup>Cl<sup>+</sup> with N<sub>2</sub>O Reaction Gas

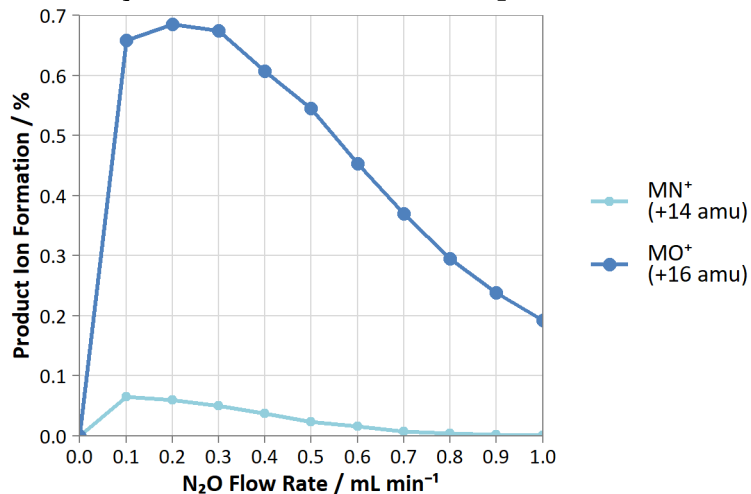

Major Product Ions of <sup>35</sup>Cl<sup>+</sup> with O<sub>2</sub> Reaction Gas

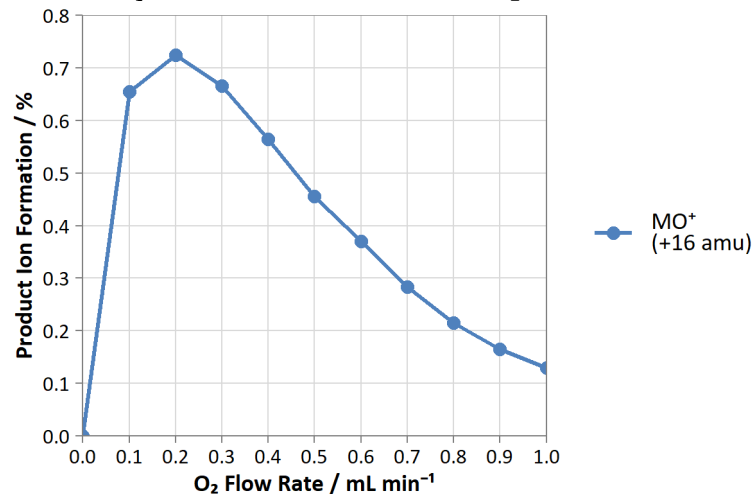

## On-Mass with N<sub>2</sub>O and O<sub>2</sub>

On-Mass Profile of <sup>35</sup>Cl<sup>+</sup> with N<sub>2</sub>O and O<sub>2</sub>

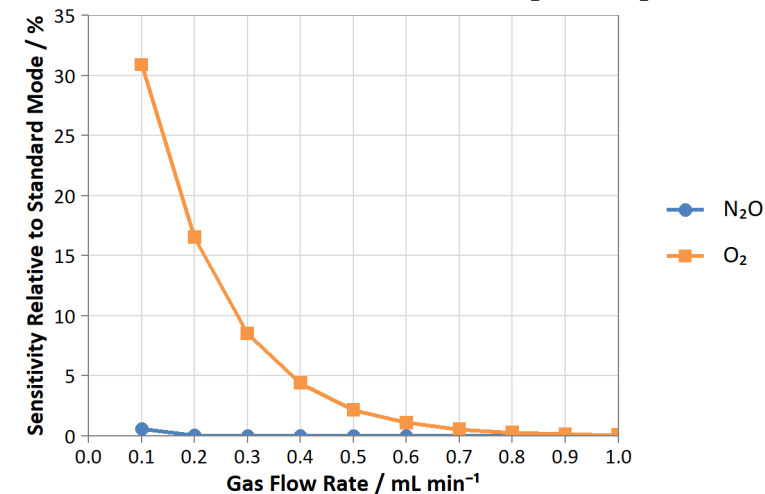

## On-Mass Removal (as Interference) with N<sub>2</sub>O

Variation of <sup>35</sup>Cl<sup>16</sup>O<sup>+</sup> Interference with N<sub>2</sub>O Flow Rate (On-Mass: Q1 = 51, Q3 = 51)

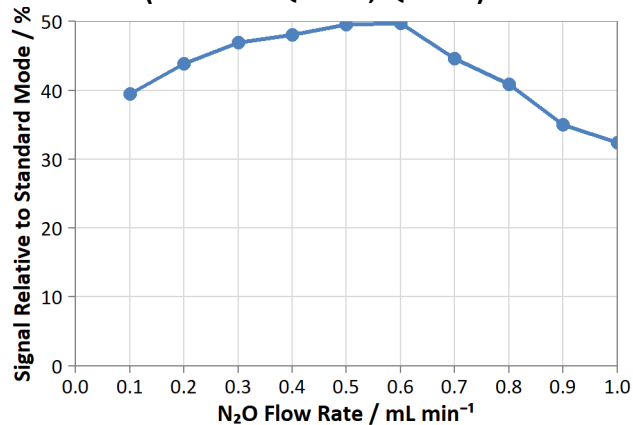

Variation of <sup>35</sup>Cl<sup>2+</sup> Interference with N<sub>2</sub>O Flow Rate (On-Mass: Q1 = 17.5, Q3 = 17.5)

[INSUFFICIENT DOUBLY-CHARGED ION FORMATION OBSERVED]

## Asymmetric Charge Transfer (with N<sub>2</sub>O)

Profile of Charge Transfer Reaction Between <sup>35</sup>Cl<sup>+</sup> and N<sub>2</sub>O

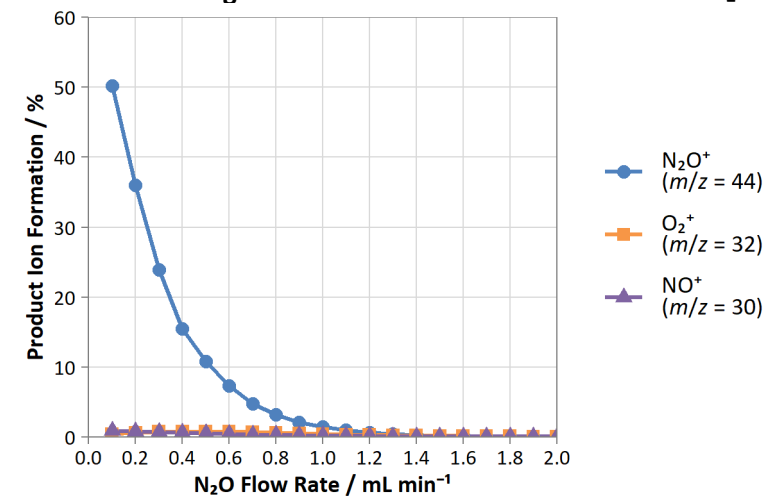

# Potassium

Supplementary Information B to: Characterisation of gas cell reactions for 70+ elements using N<sub>2</sub>O for ICP tandem mass spectrometry measurements  
Shaun T. Lancaster<sup>a\*</sup>, Thomas Prohaska<sup>ab</sup> and Johanna Irrgeher<sup>ab</sup>  
<sup>a</sup>Department of General, Analytical and Physical Chemistry, Chair of General and Analytical Chemistry, Montanuniversität Leoben, Leoben, Austria.  
<sup>b</sup>Department of Physics and Astronomy, University of Calgary, Calgary, Canada.



## Mass-Shift with N<sub>2</sub>O and O<sub>2</sub>

Major Product Ions of <sup>39</sup>K<sup>+</sup> with N<sub>2</sub>O Reaction Gas

[NO ATOM TRANSFER  
REACTION OBSERVED]

Major Product Ions of <sup>39</sup>K<sup>+</sup> with O<sub>2</sub> Reaction Gas

[NO ATOM TRANSFER  
REACTION OBSERVED]

## On-Mass with N<sub>2</sub>O and O<sub>2</sub>

On-Mass Profile of <sup>39</sup>K<sup>+</sup> with N<sub>2</sub>O and O<sub>2</sub>

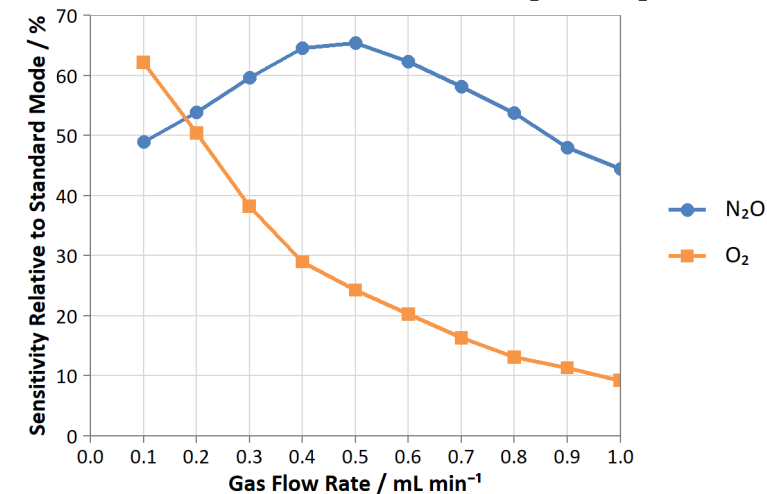

## On-Mass Removal (as Interference) with N<sub>2</sub>O

Variation of <sup>39</sup>K<sup>16</sup>O<sup>+</sup> Interference with  
N<sub>2</sub>O Flow Rate  
(On-Mass: Q1 = 55, Q3 = 55)

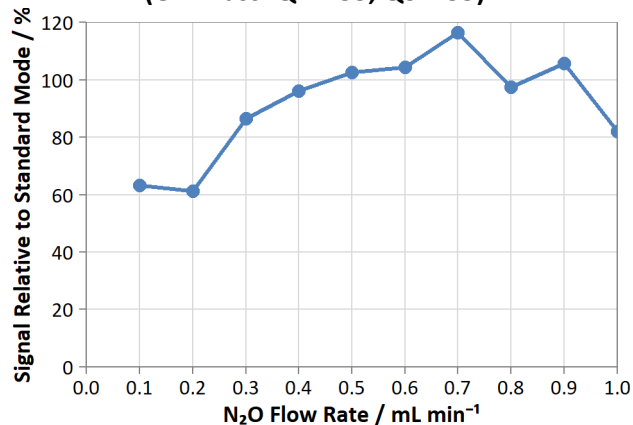

Variation of <sup>39</sup>K<sup>2+</sup> Interference with  
N<sub>2</sub>O Flow Rate  
(On-Mass: Q1 = 19.5, Q3 = 19.5)

[INSUFFICIENT DOUBLY-CHARGED  
ION FORMATION OBSERVED]

## Asymmetric Charge Transfer (with N<sub>2</sub>O)

[NO CHARGE TRANSFER  
REACTION OBSERVED]

# Calcium

Supplementary Information B to: Characterisation of gas cell reactions for 70+ elements using N<sub>2</sub>O for ICP tandem mass spectrometry measurements

Shaun T. Lancaster<sup>a\*</sup>, Thomas Prohaska<sup>ab</sup> and Johanna Irrgeher<sup>ab</sup>

<sup>a</sup>Department of General, Analytical and Physical Chemistry, Chair of General and Analytical Chemistry, Montanuniversität Leoben, Leoben, Austria.

<sup>b</sup>Department of Physics and Astronomy, University of Calgary, Calgary, Canada.



## Mass-Shift with N<sub>2</sub>O and O<sub>2</sub>

Major Product Ions of <sup>44</sup>Ca<sup>+</sup> with N<sub>2</sub>O Reaction Gas

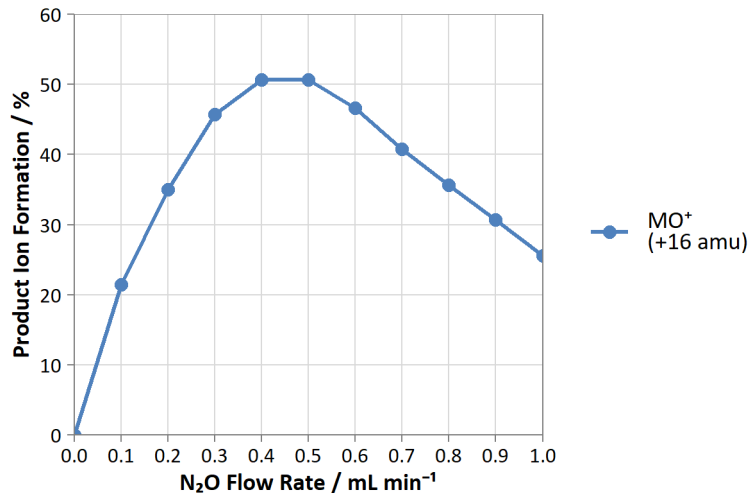

Major Product Ions of <sup>44</sup>Ca<sup>+</sup> with O<sub>2</sub> Reaction Gas

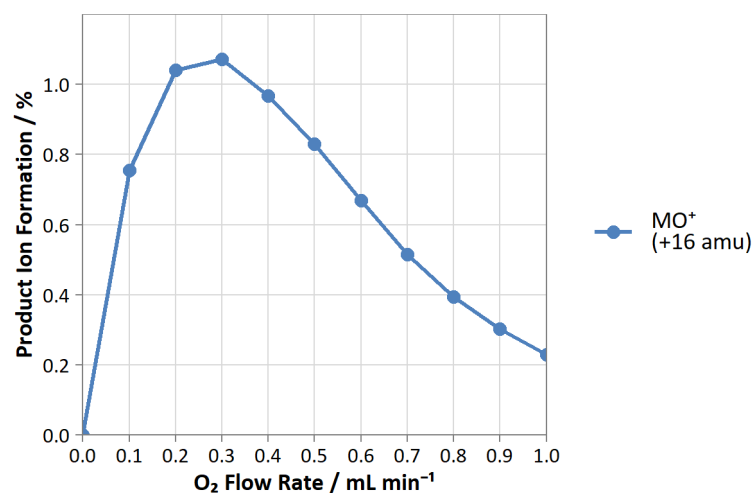

## On-Mass with N<sub>2</sub>O and O<sub>2</sub>

On-Mass Profile of <sup>44</sup>Ca<sup>+</sup> with N<sub>2</sub>O and O<sub>2</sub>

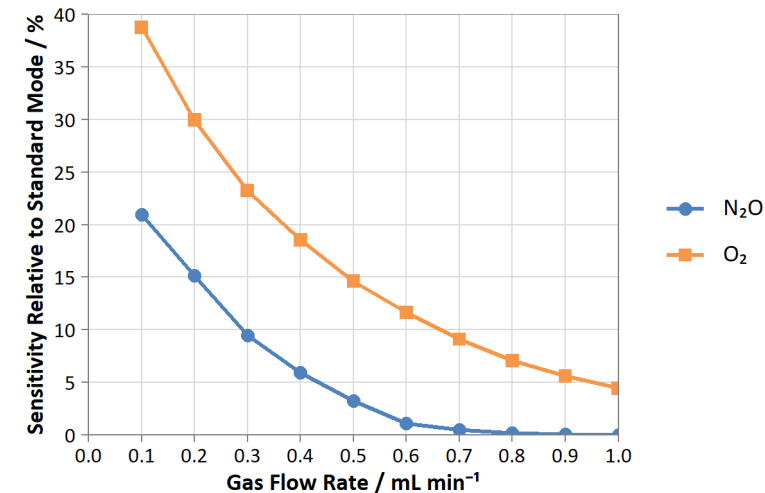

## On-Mass Removal (as Interference) with N<sub>2</sub>O

Variation of <sup>44</sup>Ca<sup>16</sup>O<sup>+</sup> Interference with N<sub>2</sub>O Flow Rate (On-Mass: Q1 = 60, Q3 = 60)

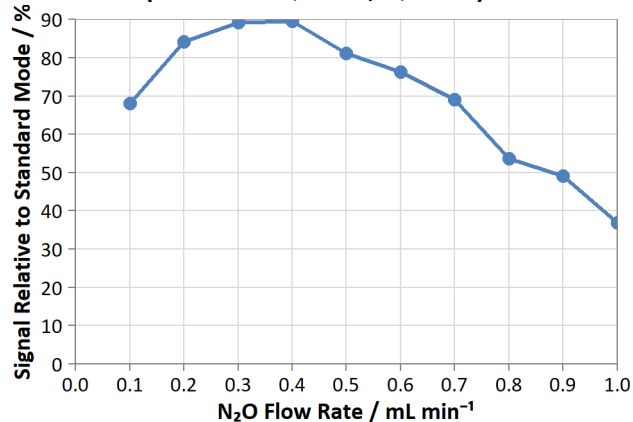

Variation of <sup>44</sup>Ca<sup>2+</sup> Interference with N<sub>2</sub>O Flow Rate (On-Mass: Q1 = 22, Q3 = 22)

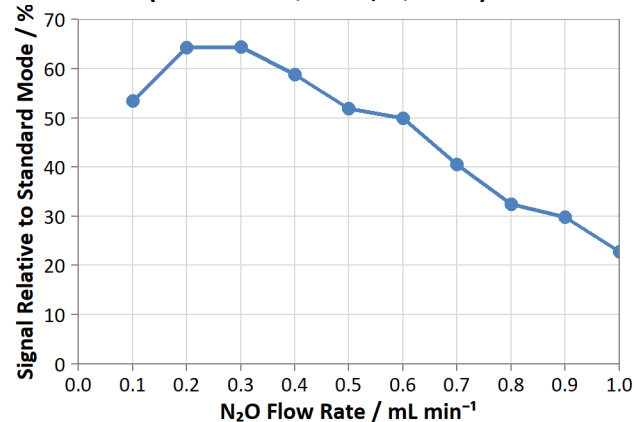

## Asymmetric Charge Transfer (with N<sub>2</sub>O)

[NO CHARGE TRANSFER REACTION OBSERVED]



# Scandium

Supplementary Information B to: Characterisation of gas cell reactions for 70+ elements using N<sub>2</sub>O for ICP tandem mass spectrometry measurements

Shaun T. Lancaster<sup>a\*</sup>, Thomas Prohaska<sup>ab</sup> and Johanna Irrgeher<sup>ab</sup>

<sup>a</sup>Department of General, Analytical and Physical Chemistry, Chair of General and Analytical Chemistry, Montanuniversität Leoben, Leoben, Austria.

<sup>b</sup>Department of Physics and Astronomy, University of Calgary, Calgary, Canada.



## Mass-Shift with N<sub>2</sub>O and O<sub>2</sub>

Major Product Ions of <sup>45</sup>Sc<sup>+</sup> with N<sub>2</sub>O Reaction Gas

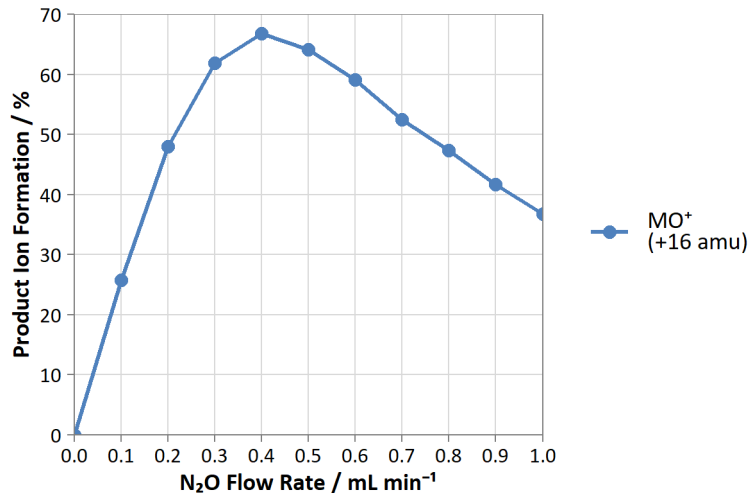

Major Product Ions of <sup>45</sup>Sc<sup>+</sup> with O<sub>2</sub> Reaction Gas

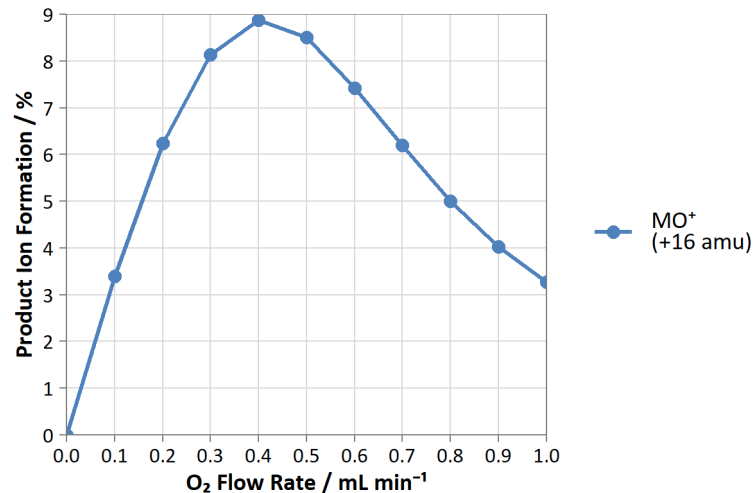

## On-Mass with N<sub>2</sub>O and O<sub>2</sub>

On-Mass Profile of <sup>45</sup>Sc<sup>+</sup> with N<sub>2</sub>O and O<sub>2</sub>

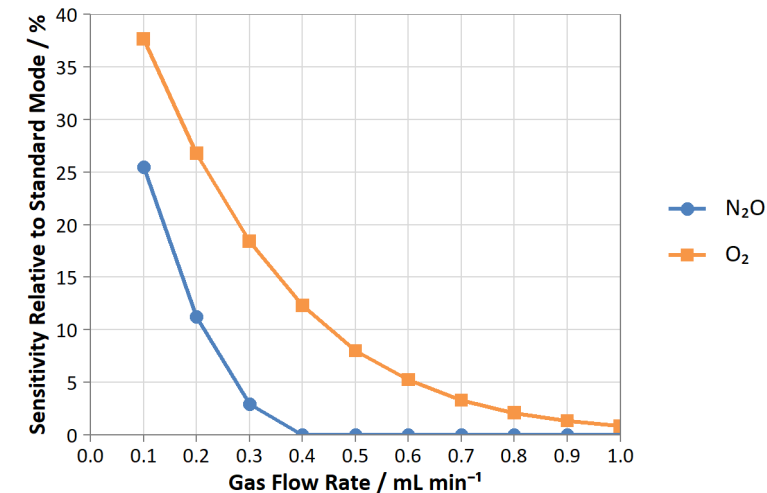

## On-Mass Removal (as Interference) with N<sub>2</sub>O

Variation of <sup>45</sup>Sc<sup>16</sup>O<sup>+</sup> Interference with N<sub>2</sub>O Flow Rate  
(On-Mass: Q1 = 61, Q3 = 61)

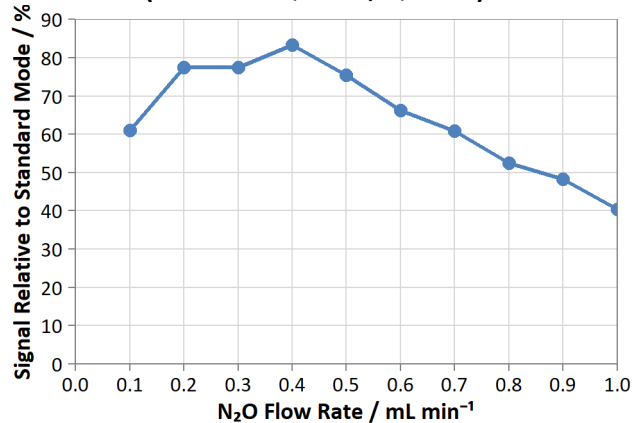

Variation of <sup>45</sup>Sc<sup>2+</sup> Interference with N<sub>2</sub>O Flow Rate  
(On-Mass: Q1 = 22.5, Q3 = 22.5)

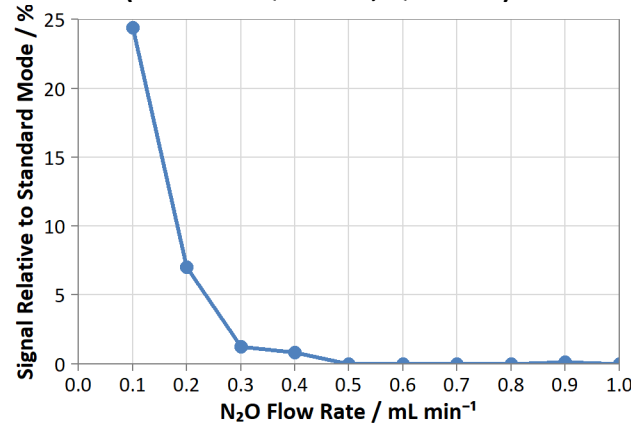

## Asymmetric Charge Transfer (with N<sub>2</sub>O)

[NO CHARGE TRANSFER REACTION OBSERVED]

# Titanium

Supplementary Information B to: Characterisation of gas cell reactions for 70+ elements using N<sub>2</sub>O for ICP tandem mass spectrometry measurements

Shaun T. Lancaster<sup>a\*</sup>, Thomas Prohaska<sup>ab</sup> and Johanna Irrgeher<sup>ab</sup>

<sup>a</sup>Department of General, Analytical and Physical Chemistry, Chair of General and Analytical Chemistry, Montanuniversität Leoben, Leoben, Austria.

<sup>b</sup>Department of Physics and Astronomy, University of Calgary, Calgary, Canada.



## Mass-Shift with N<sub>2</sub>O and O<sub>2</sub>

Major Product Ions of <sup>47</sup>Ti<sup>+</sup> with N<sub>2</sub>O Reaction Gas

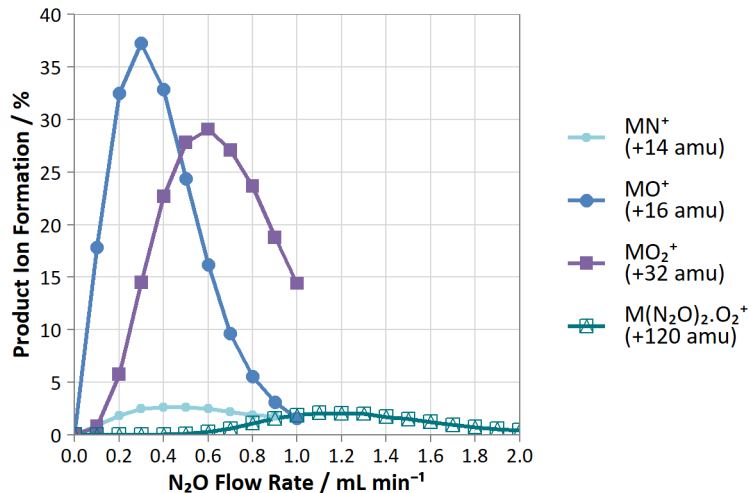

Major Product Ions of <sup>47</sup>Ti<sup>+</sup> with O<sub>2</sub> Reaction Gas

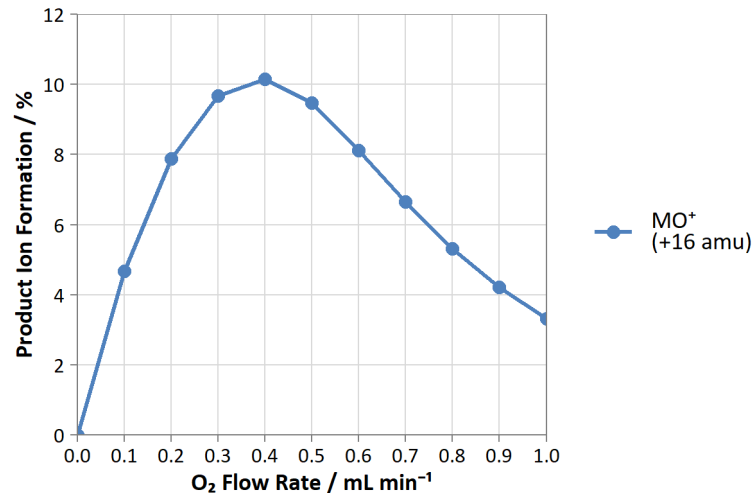

## On-Mass with N<sub>2</sub>O and O<sub>2</sub>

On-Mass Profile of <sup>47</sup>Ti<sup>+</sup> with N<sub>2</sub>O and O<sub>2</sub>

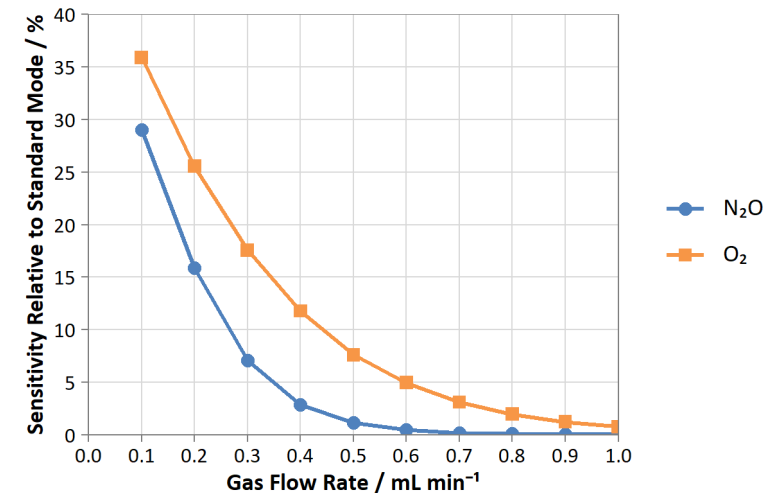

## On-Mass Removal (as Interference) with N<sub>2</sub>O

Variation of <sup>47</sup>Ti<sup>16</sup>O<sup>+</sup> Interference with N<sub>2</sub>O Flow Rate (On-Mass: Q1 = 63, Q3 = 63)

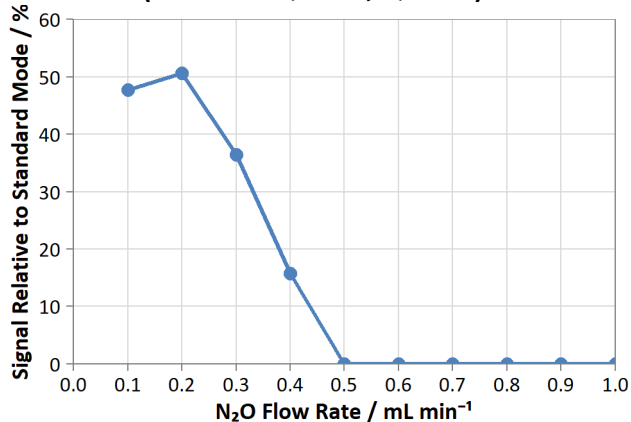

Variation of <sup>47</sup>Ti<sup>2+</sup> Interference with N<sub>2</sub>O Flow Rate (On-Mass: Q1 = 23.5, Q3 = 23.5)

[INSUFFICIENT DOUBLY-CHARGED ION FORMATION OBSERVED]

## Asymmetric Charge Transfer (with N<sub>2</sub>O)

[NO CHARGE TRANSFER REACTION OBSERVED]



# Vanadium

Supplementary Information B to: Characterisation of gas cell reactions for 70+ elements using N<sub>2</sub>O for ICP tandem mass spectrometry measurements

Shaun T. Lancaster<sup>a\*</sup>, Thomas Prohaska<sup>ab</sup> and Johanna Irrgeher<sup>ab</sup>

<sup>a</sup>Department of General, Analytical and Physical Chemistry, Chair of General and Analytical Chemistry, Montanuniversität Leoben, Leoben, Austria.

<sup>b</sup>Department of Physics and Astronomy, University of Calgary, Calgary, Canada.



## Mass-Shift with N<sub>2</sub>O and O<sub>2</sub>

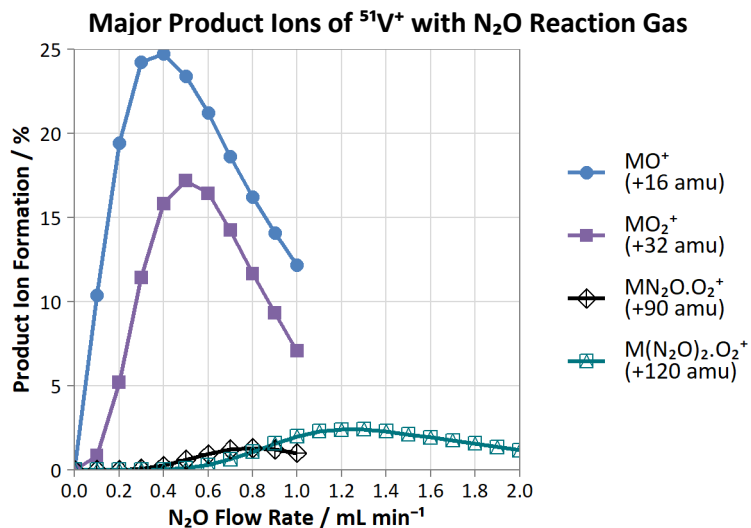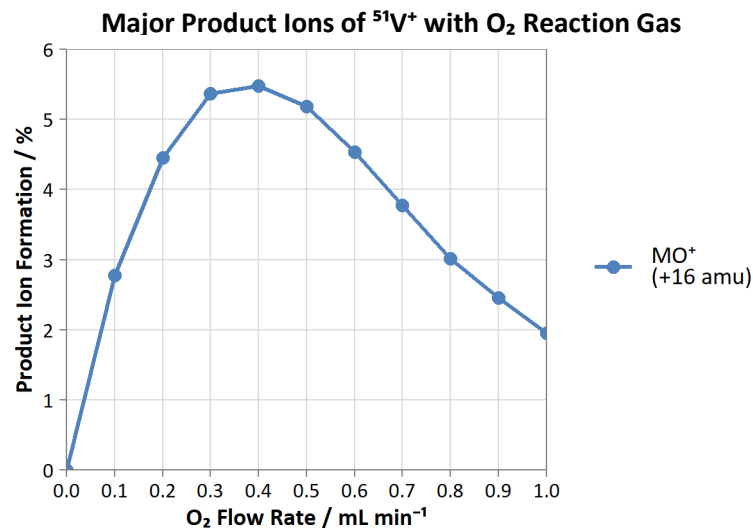

## On-Mass with N<sub>2</sub>O and O<sub>2</sub>

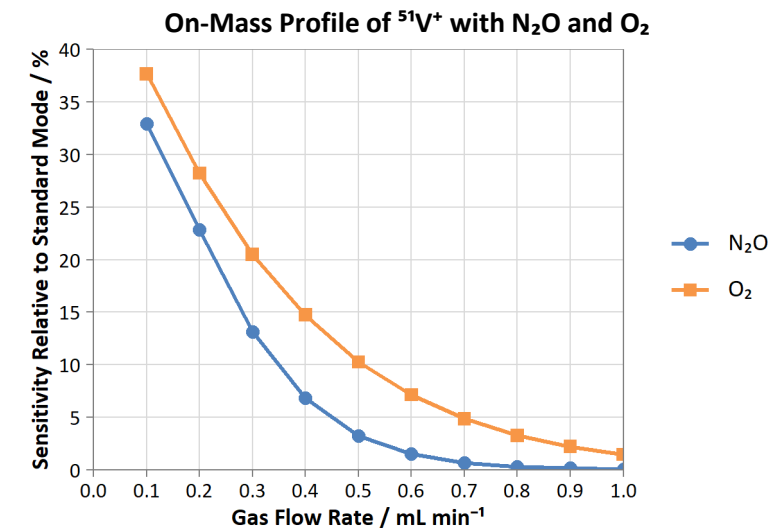

## On-Mass Removal (as Interference) with N<sub>2</sub>O

Variation of <sup>51</sup>V<sup>16</sup>O<sup>+</sup> Interference with N<sub>2</sub>O Flow Rate (On-Mass: Q1 = 67, Q3 = 67)

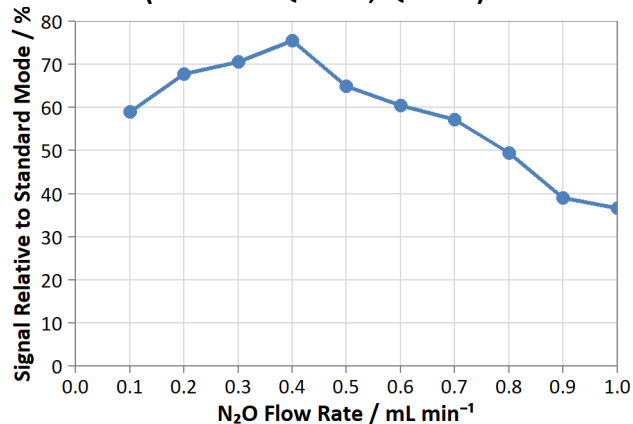

Variation of <sup>51</sup>V<sup>2+</sup> Interference with N<sub>2</sub>O Flow Rate (On-Mass: Q1 = 25.5, Q3 = 25.5)

[INSUFFICIENT DOUBLY-CHARGED ION FORMATION OBSERVED]

## Asymmetric Charge Transfer (with N<sub>2</sub>O)

[NO CHARGE TRANSFER REACTION OBSERVED]



# Chromium

Supplementary Information B to: Characterisation of gas cell reactions for 70+ elements using N<sub>2</sub>O for ICP tandem mass spectrometry measurements

Shaun T. Lancaster<sup>a\*</sup>, Thomas Prohaska<sup>ab</sup> and Johanna Irrgeher<sup>ab</sup>

<sup>a</sup>Department of General, Analytical and Physical Chemistry, Chair of General and Analytical Chemistry, Montanuniversität Leoben, Leoben, Austria.

<sup>b</sup>Department of Physics and Astronomy, University of Calgary, Calgary, Canada.



## Mass-Shift with N<sub>2</sub>O and O<sub>2</sub>

Major Product Ions of <sup>52</sup>Cr<sup>+</sup> with N<sub>2</sub>O Reaction Gas

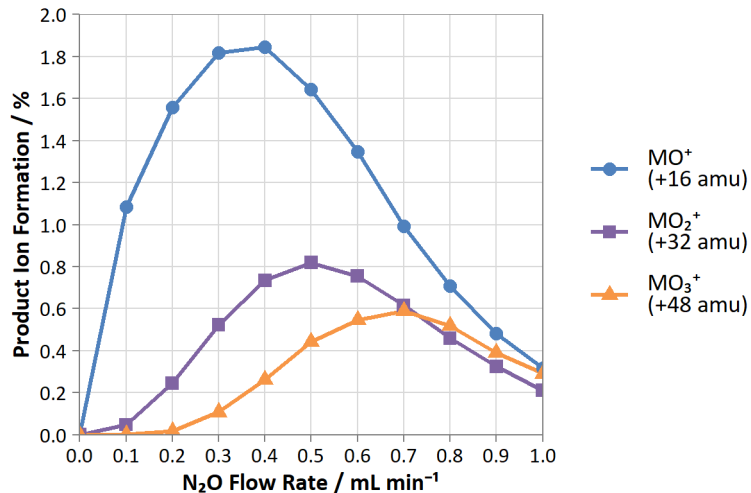

Major Product Ions of <sup>52</sup>Cr<sup>+</sup> with O<sub>2</sub> Reaction Gas

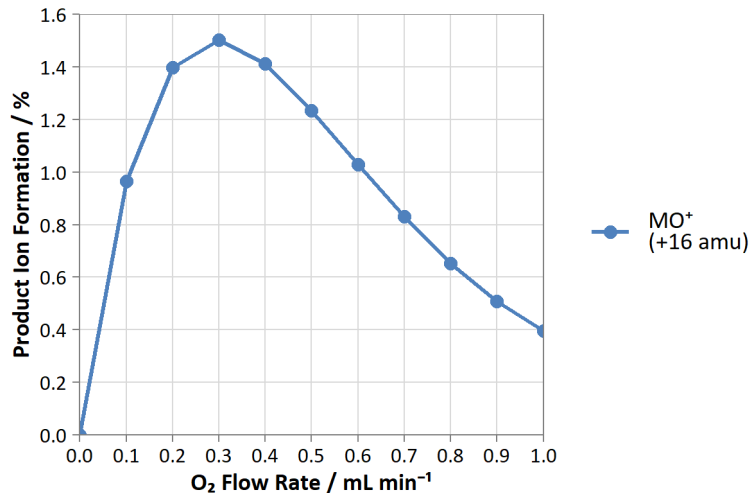

## On-Mass with N<sub>2</sub>O and O<sub>2</sub>

On-Mass Profile of <sup>52</sup>Cr<sup>+</sup> with N<sub>2</sub>O and O<sub>2</sub>

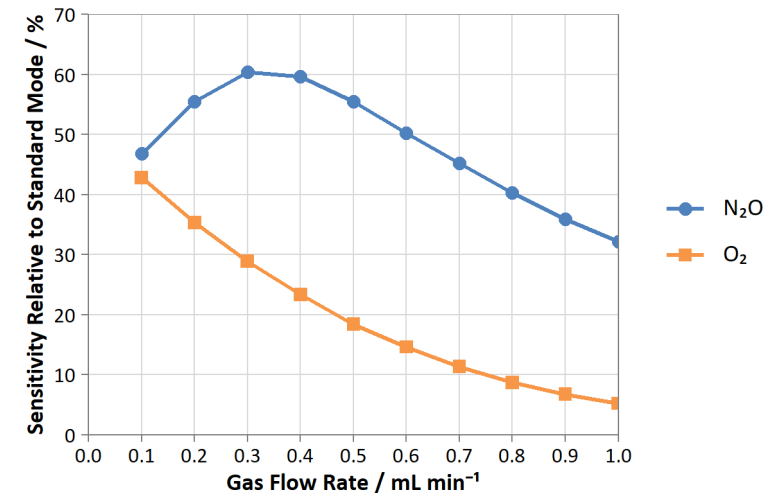

## On-Mass Removal (as Interference) with N<sub>2</sub>O

Variation of <sup>52</sup>Cr<sup>16</sup>O<sup>+</sup> Interference with N<sub>2</sub>O Flow Rate (On-Mass: Q1 = 68, Q3 = 68)

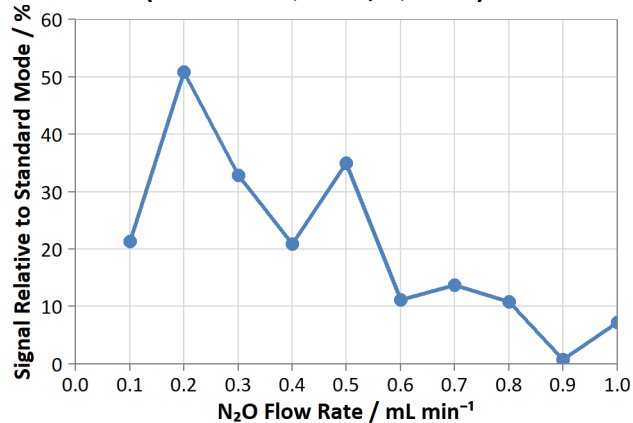

Variation of <sup>52</sup>Cr<sup>2+</sup> Interference with N<sub>2</sub>O Flow Rate (On-Mass: Q1 = 26, Q3 = 26)

[INSUFFICIENT DOUBLY-CHARGED ION FORMATION OBSERVED]

## Asymmetric Charge Transfer (with N<sub>2</sub>O)

[NO CHARGE TRANSFER REACTION OBSERVED]



# Manganese

Supplementary Information B to: Characterisation of gas cell reactions for 70+ elements using N<sub>2</sub>O for ICP tandem mass spectrometry measurements

Shaun T. Lancaster<sup>a\*</sup>, Thomas Prohaska<sup>ab</sup> and Johanna Irrgeher<sup>ab</sup>

<sup>a</sup>Department of General, Analytical and Physical Chemistry, Chair of General and Analytical Chemistry, Montanuniversität Leoben, Leoben, Austria.

<sup>b</sup>Department of Physics and Astronomy, University of Calgary, Calgary, Canada.



## Mass-Shift with N<sub>2</sub>O and O<sub>2</sub>

Major Product Ions of <sup>55</sup>Mn<sup>+</sup> with N<sub>2</sub>O Reaction Gas

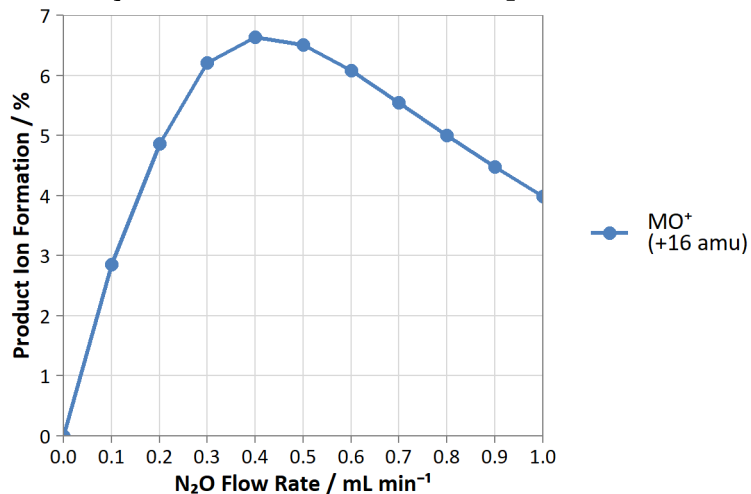

Major Product Ions of <sup>55</sup>Mn<sup>+</sup> with O<sub>2</sub> Reaction Gas

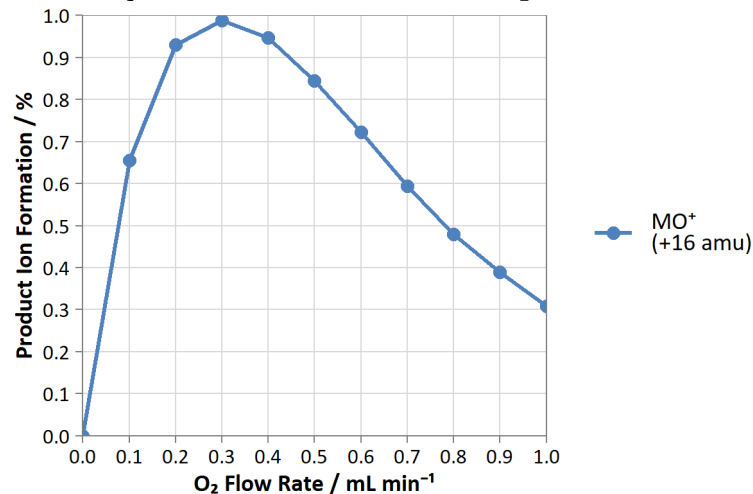

## On-Mass with N<sub>2</sub>O and O<sub>2</sub>

On-Mass Profile of <sup>55</sup>Mn<sup>+</sup> with N<sub>2</sub>O and O<sub>2</sub>

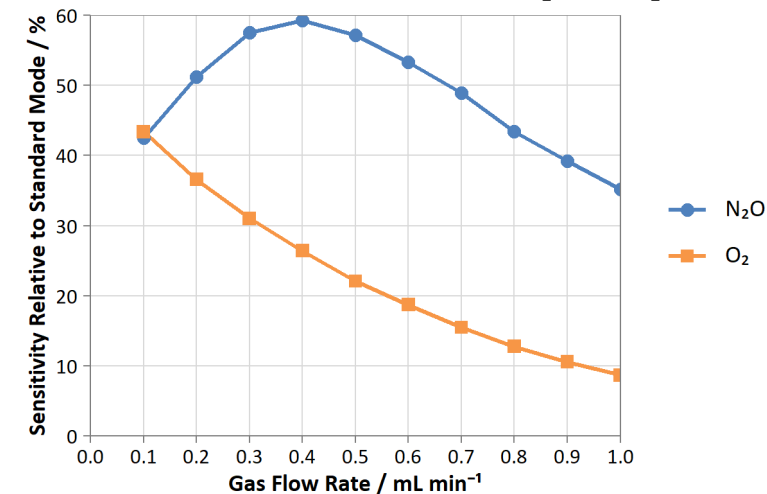

## On-Mass Removal (as Interference) with N<sub>2</sub>O

Variation of <sup>55</sup>Mn<sup>16</sup>O<sup>+</sup> Interference with N<sub>2</sub>O Flow Rate  
(On-Mass: Q1 = 71, Q3 = 71)

[INSUFFICIENT OXIDE FORMATION OBSERVED]

Variation of <sup>55</sup>Mn<sup>2+</sup> Interference with N<sub>2</sub>O Flow Rate  
(On-Mass: Q1 = 27.5, Q3 = 27.5)

[INSUFFICIENT DOUBLY-CHARGED ION FORMATION OBSERVED]

## Asymmetric Charge Transfer (with N<sub>2</sub>O)

[NO CHARGE TRANSFER REACTION OBSERVED]



## Mass-Shift with N<sub>2</sub>O and O<sub>2</sub>

Major Product Ions of <sup>57</sup>Fe<sup>+</sup> with N<sub>2</sub>O Reaction Gas

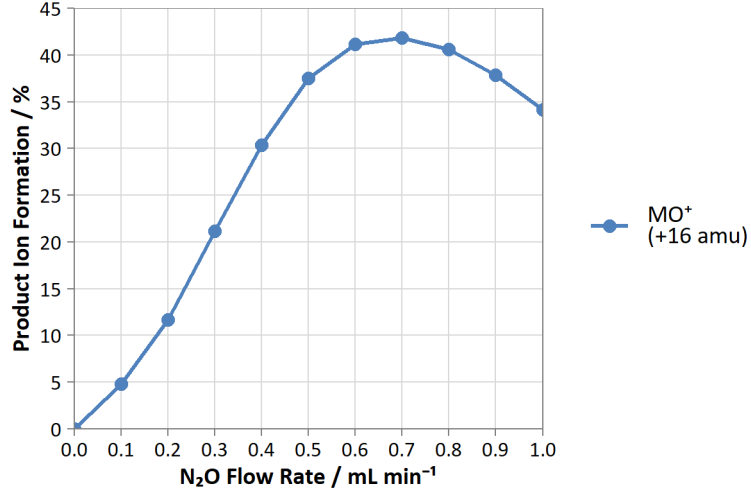

Major Product Ions of <sup>57</sup>Fe<sup>+</sup> with O<sub>2</sub> Reaction Gas

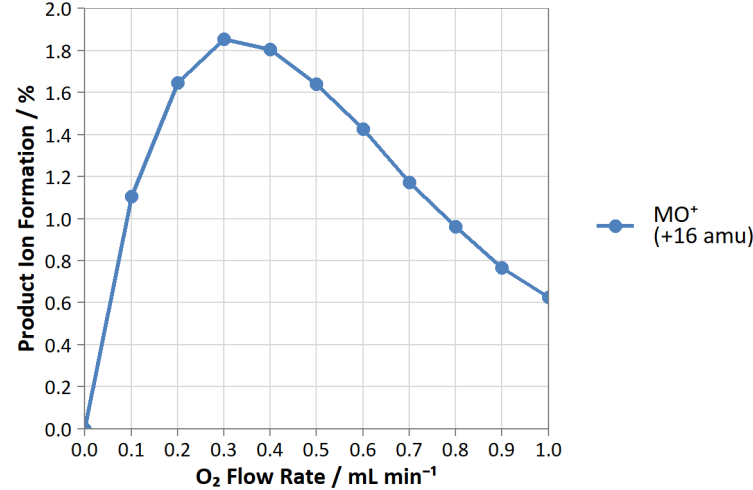

## On-Mass with N<sub>2</sub>O and O<sub>2</sub>

On-Mass Profile of <sup>57</sup>Fe<sup>+</sup> with N<sub>2</sub>O and O<sub>2</sub>

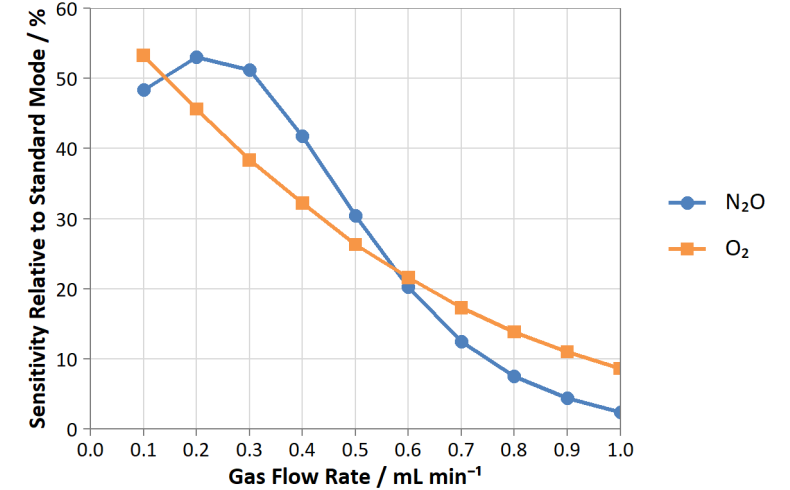

## On-Mass Removal (as Interference) with N<sub>2</sub>O

Variation of <sup>57</sup>Fe<sup>16</sup>O<sup>+</sup> Interference with N<sub>2</sub>O Flow Rate  
(On-Mass: Q1 = 73, Q3 = 73)

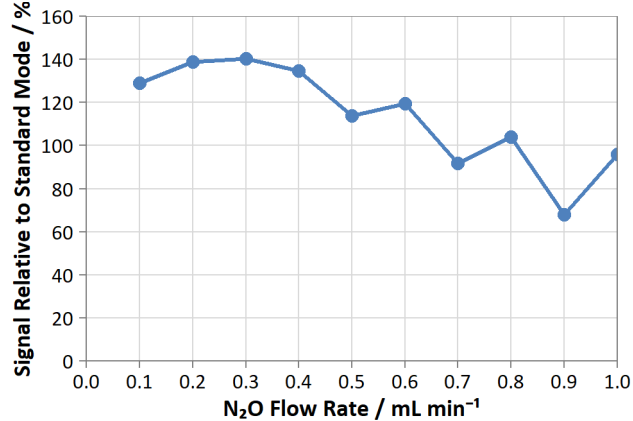

Variation of <sup>57</sup>Fe<sup>2+</sup> Interference with N<sub>2</sub>O Flow Rate  
(On-Mass: Q1 = 28.5, Q3 = 28.5)

[INSUFFICIENT DOUBLY-CHARGED ION FORMATION OBSERVED]

## Asymmetric Charge Transfer (with N<sub>2</sub>O)

[NO CHARGE TRANSFER REACTION OBSERVED]



## Mass-Shift with N<sub>2</sub>O and O<sub>2</sub>

Major Product Ions of <sup>59</sup>Co<sup>+</sup> with N<sub>2</sub>O Reaction Gas

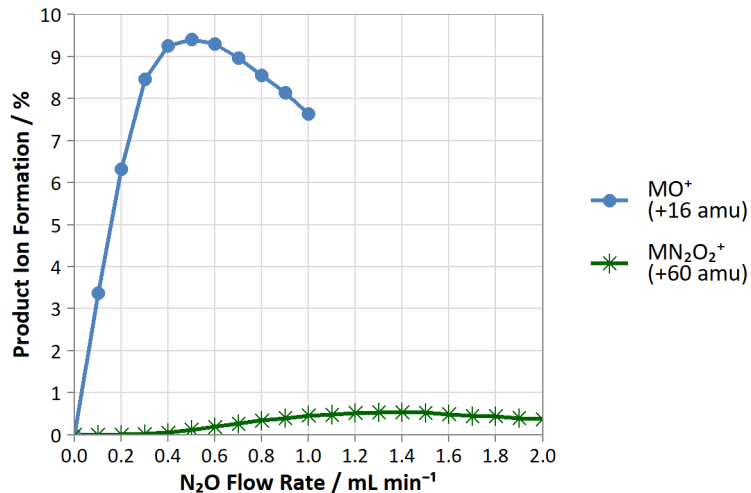

Major Product Ions of <sup>59</sup>Co<sup>+</sup> with O<sub>2</sub> Reaction Gas

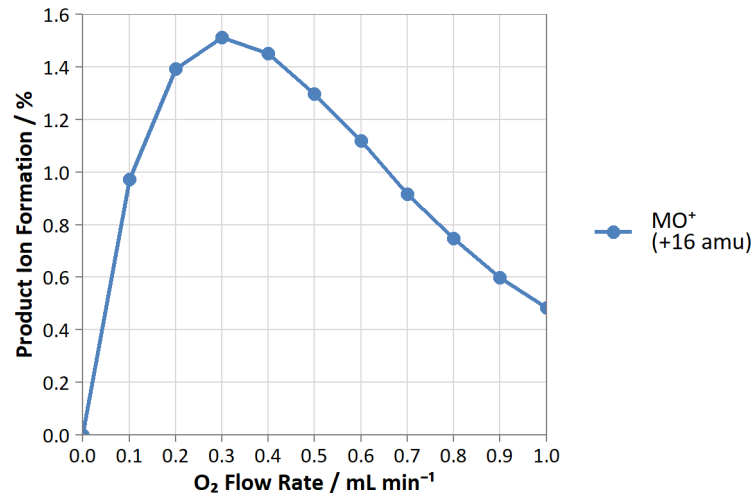

## On-Mass with N<sub>2</sub>O and O<sub>2</sub>

On-Mass Profile of <sup>59</sup>Co<sup>+</sup> with N<sub>2</sub>O and O<sub>2</sub>

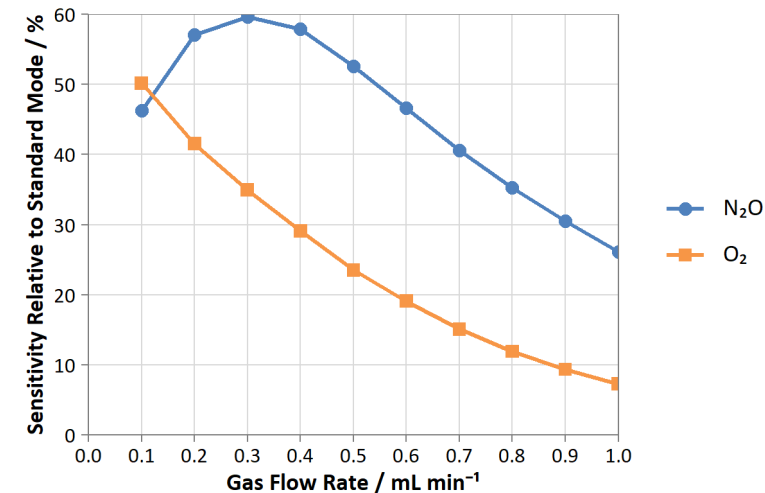

## On-Mass Removal (as Interference) with N<sub>2</sub>O

Variation of <sup>59</sup>Co<sup>16</sup>O<sup>+</sup> Interference with N<sub>2</sub>O Flow Rate  
(On-Mass: Q1 = 75, Q3 = 75)

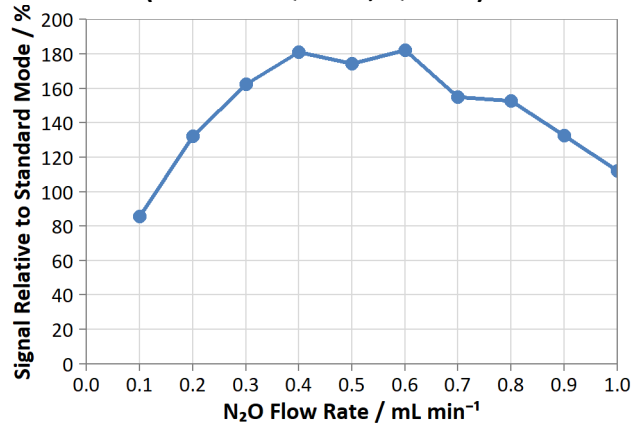

Variation of <sup>59</sup>Co<sup>2+</sup> Interference with N<sub>2</sub>O Flow Rate  
(On-Mass: Q1 = 29.5, Q3 = 29.5)

[INSUFFICIENT DOUBLY-CHARGED ION FORMATION OBSERVED]

## Asymmetric Charge Transfer (with N<sub>2</sub>O)

[NO CHARGE TRANSFER REACTION OBSERVED]



## Mass-Shift with N<sub>2</sub>O and O<sub>2</sub>

Major Product Ions of <sup>60</sup>Ni<sup>+</sup> with N<sub>2</sub>O Reaction Gas

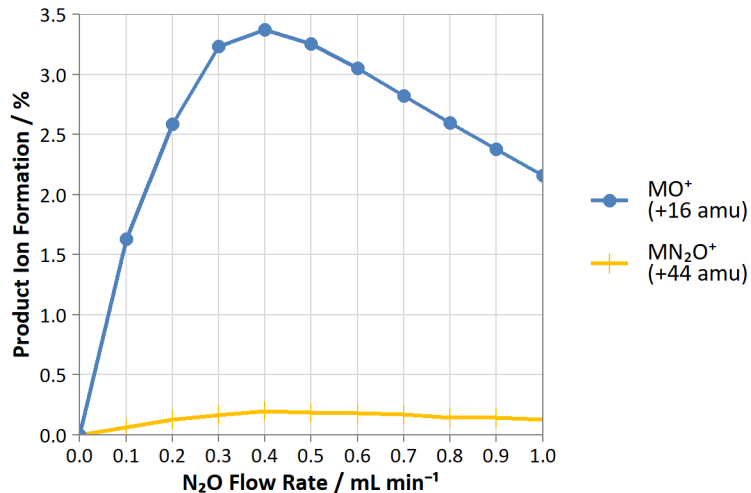

Major Product Ions of <sup>60</sup>Ni<sup>+</sup> with O<sub>2</sub> Reaction Gas

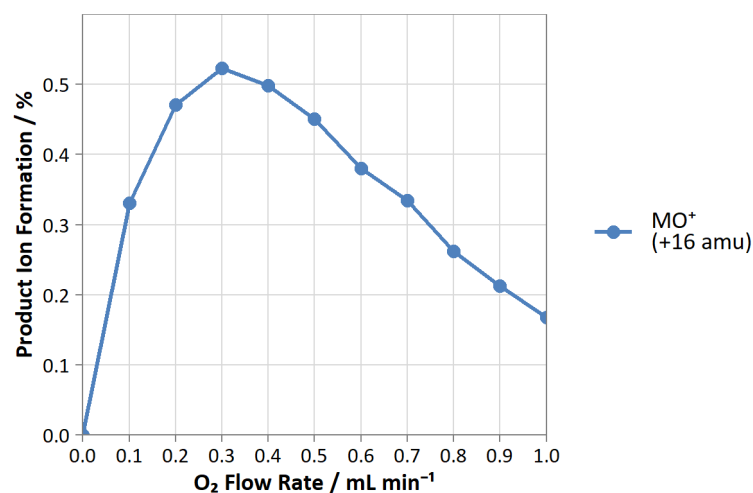

## On-Mass with N<sub>2</sub>O and O<sub>2</sub>

On-Mass Profile of <sup>60</sup>Ni<sup>+</sup> with N<sub>2</sub>O and O<sub>2</sub>

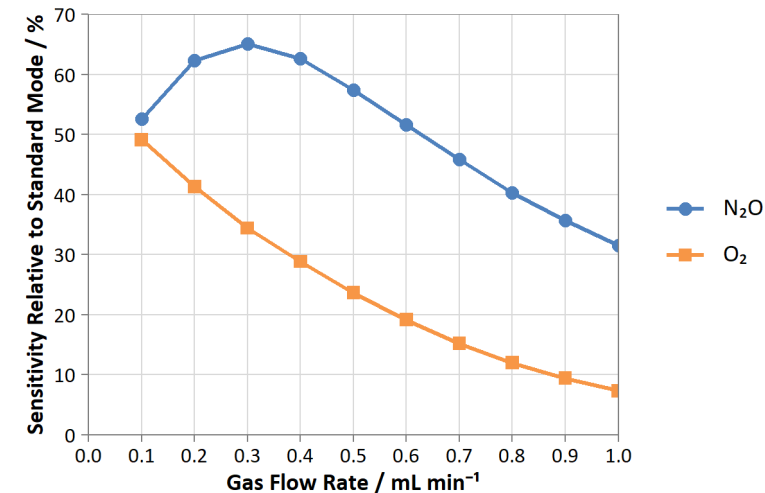

## On-Mass Removal (as Interference) with N<sub>2</sub>O

Variation of <sup>60</sup>Ni<sup>16</sup>O<sup>+</sup> Interference with N<sub>2</sub>O Flow Rate (On-Mass: Q1 = 76, Q3 = 76)

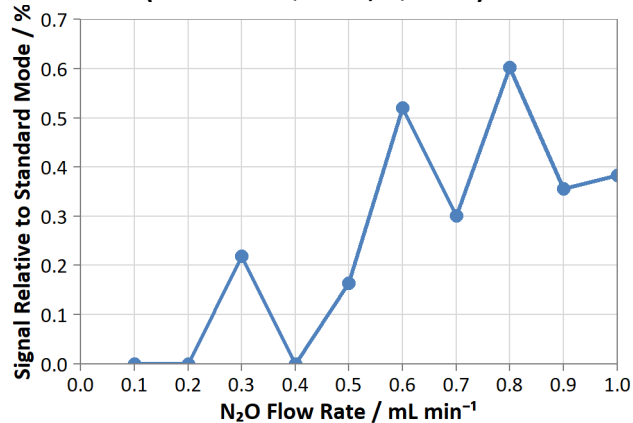

Variation of <sup>60</sup>Ni<sup>2+</sup> Interference with N<sub>2</sub>O Flow Rate (On-Mass: Q1 = 30, Q3 = 30)

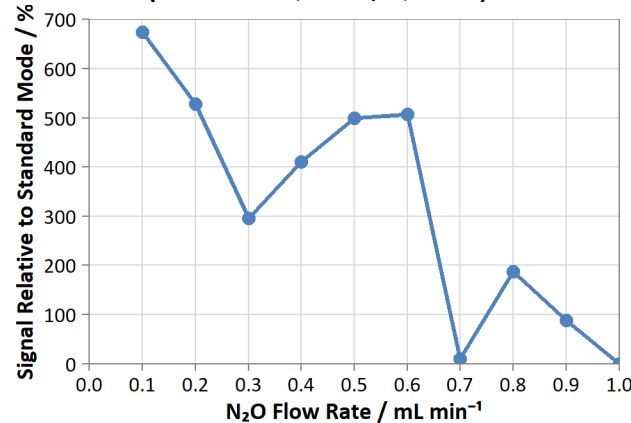

## Asymmetric Charge Transfer (with N<sub>2</sub>O)

[NO CHARGE TRANSFER REACTION OBSERVED]



## Mass-Shift with N<sub>2</sub>O and O<sub>2</sub>

Major Product Ions of <sup>63</sup>Cu<sup>+</sup> with N<sub>2</sub>O Reaction Gas

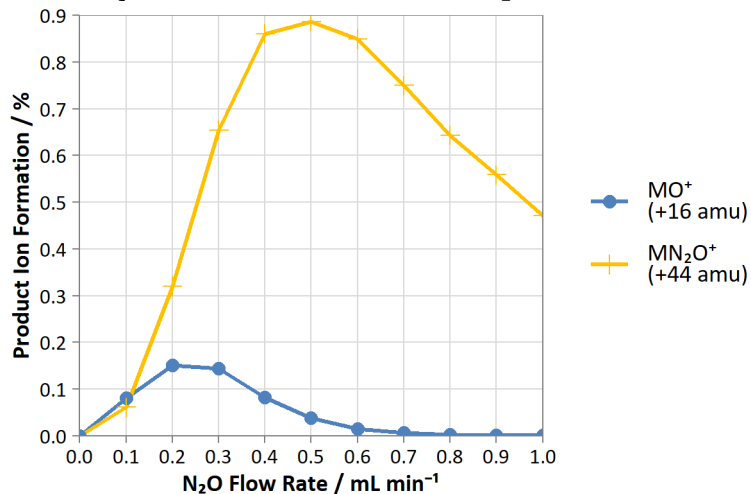

Major Product Ions of <sup>63</sup>Cu<sup>+</sup> with O<sub>2</sub> Reaction Gas

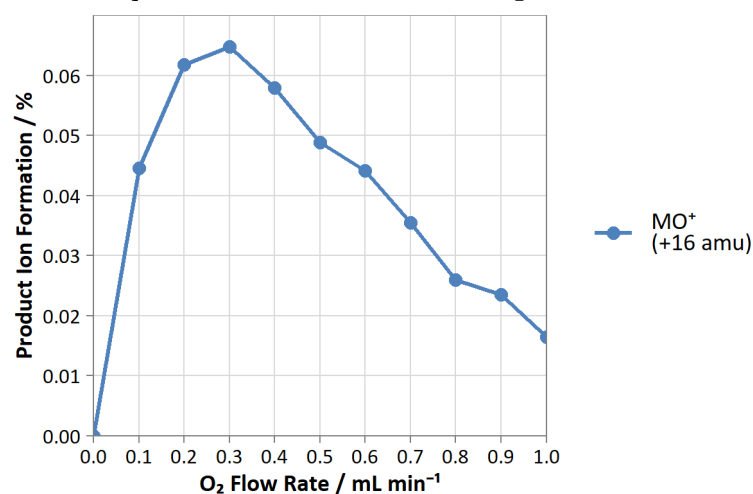

## On-Mass with N<sub>2</sub>O and O<sub>2</sub>

On-Mass Profile of <sup>63</sup>Cu<sup>+</sup> with N<sub>2</sub>O and O<sub>2</sub>

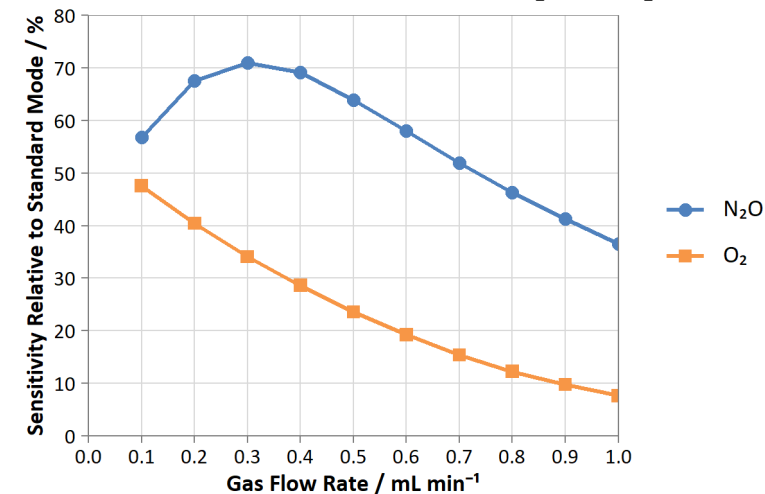

## On-Mass Removal (as Interference) with N<sub>2</sub>O

Variation of <sup>63</sup>Cu<sup>16</sup>O<sup>+</sup> Interference with N<sub>2</sub>O Flow Rate  
 (On-Mass: Q1 = 79, Q3 = 79)

[INSUFFICIENT OXIDE FORMATION OBSERVED]

Variation of <sup>63</sup>Cu<sup>2+</sup> Interference with N<sub>2</sub>O Flow Rate  
 (On-Mass: Q1 = 31.5, Q3 = 31.5)

[INSUFFICIENT DOUBLY-CHARGED ION FORMATION OBSERVED]

## Asymmetric Charge Transfer (with N<sub>2</sub>O)

[NO CHARGE TRANSFER REACTION OBSERVED]

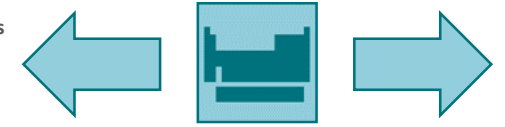

## Mass-Shift with N<sub>2</sub>O and O<sub>2</sub>

Major Product Ions of <sup>66</sup>Zn<sup>+</sup> with N<sub>2</sub>O Reaction Gas

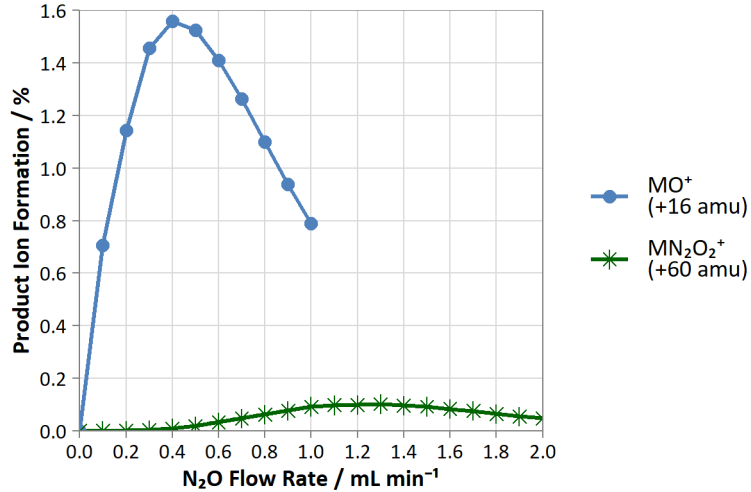

Major Product Ions of <sup>66</sup>Zn<sup>+</sup> with O<sub>2</sub> Reaction Gas

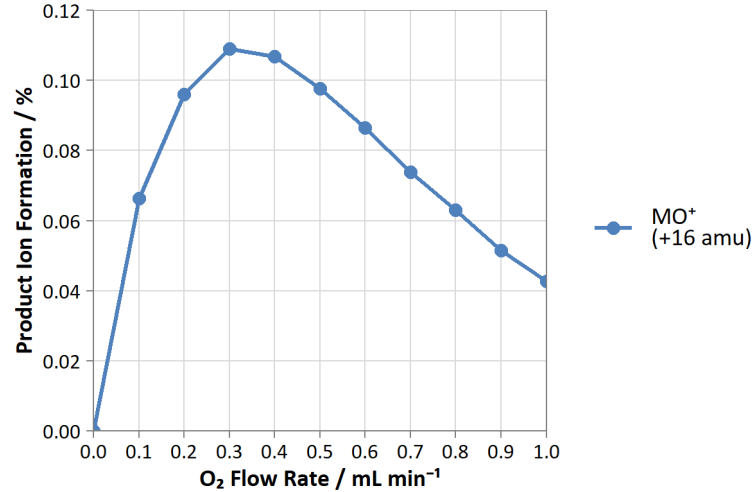

## On-Mass with N<sub>2</sub>O and O<sub>2</sub>

On-Mass Profile of <sup>66</sup>Zn<sup>+</sup> with N<sub>2</sub>O and O<sub>2</sub>

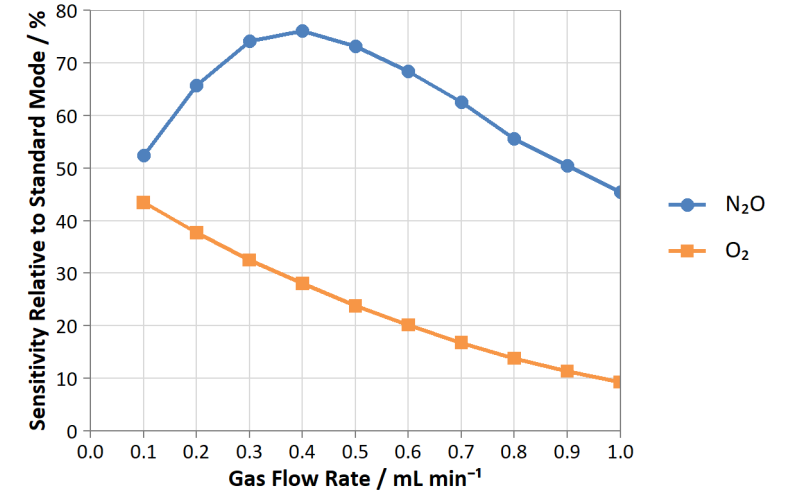

## On-Mass Removal (as Interference) with N<sub>2</sub>O

Variation of <sup>66</sup>Zn<sup>16</sup>O<sup>+</sup> Interference with N<sub>2</sub>O Flow Rate (On-Mass: Q1 = 82, Q3 = 82)

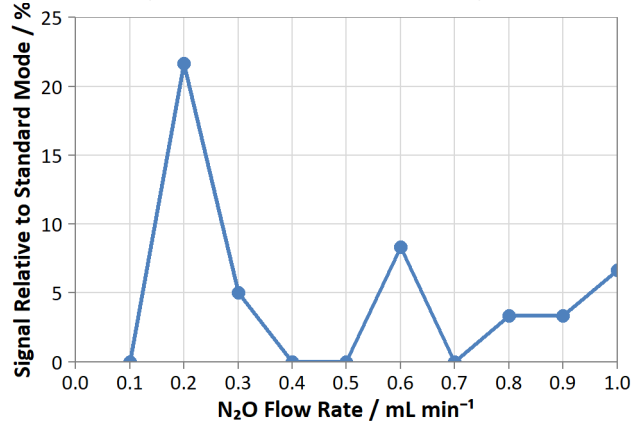

Variation of <sup>66</sup>Zn<sup>2+</sup> Interference with N<sub>2</sub>O Flow Rate (On-Mass: Q1 = 33, Q3 = 33)

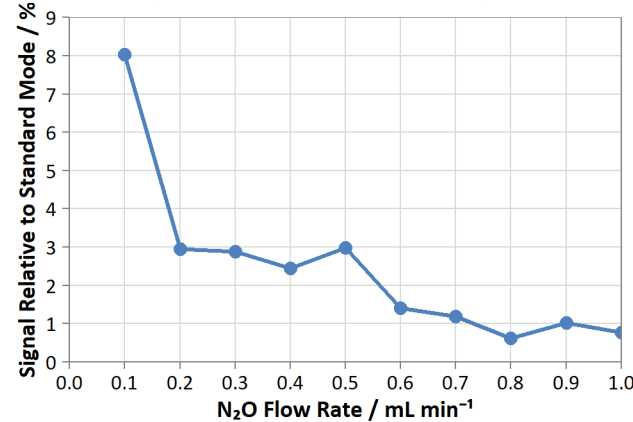

## Asymmetric Charge Transfer (with N<sub>2</sub>O)

[NO CHARGE TRANSFER REACTION OBSERVED]



## Mass-Shift with N<sub>2</sub>O and O<sub>2</sub>

Major Product Ions of <sup>69</sup>Ga<sup>+</sup> with N<sub>2</sub>O Reaction Gas

[NO ATOM TRANSFER  
REACTION OBSERVED]

Major Product Ions of <sup>69</sup>Ga<sup>+</sup> with O<sub>2</sub> Reaction Gas

[NO ATOM TRANSFER  
REACTION OBSERVED]

## On-Mass with N<sub>2</sub>O and O<sub>2</sub>

On-Mass Profile of <sup>69</sup>Ga<sup>+</sup> with N<sub>2</sub>O and O<sub>2</sub>

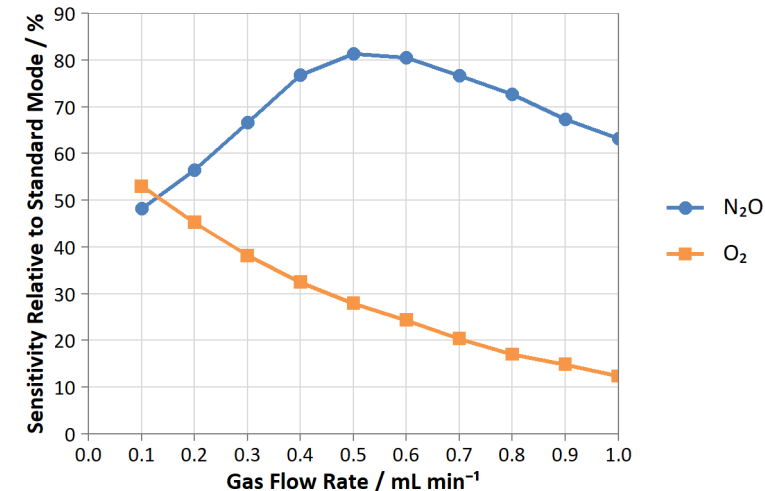

## On-Mass Removal (as Interference) with N<sub>2</sub>O

Variation of <sup>69</sup>Ga<sup>16</sup>O<sup>+</sup> Interference with  
N<sub>2</sub>O Flow Rate  
(On-Mass: Q1 = 85, Q3 = 85)

[INSUFFICIENT OXIDE  
FORMATION OBSERVED]

Variation of <sup>69</sup>Ga<sup>2+</sup> Interference with  
N<sub>2</sub>O Flow Rate  
(On-Mass: Q1 = 34.5, Q3 = 34.5)

[INSUFFICIENT DOUBLY-CHARGED  
ION FORMATION OBSERVED]

## Asymmetric Charge Transfer (with N<sub>2</sub>O)

[NO CHARGE TRANSFER  
REACTION OBSERVED]



# Germanium

Supplementary Information B to: Characterisation of gas cell reactions for 70+ elements using N<sub>2</sub>O for ICP tandem mass spectrometry measurements

Shaun T. Lancaster<sup>a\*</sup>, Thomas Prohaska<sup>ab</sup> and Johanna Irrgeher<sup>ab</sup>

<sup>a</sup>Department of General, Analytical and Physical Chemistry, Chair of General and Analytical Chemistry, Montanuniversität Leoben, Leoben, Austria.

<sup>b</sup>Department of Physics and Astronomy, University of Calgary, Calgary, Canada.



## Mass-Shift with N<sub>2</sub>O and O<sub>2</sub>

Major Product Ions of <sup>74</sup>Ge<sup>+</sup> with N<sub>2</sub>O Reaction Gas

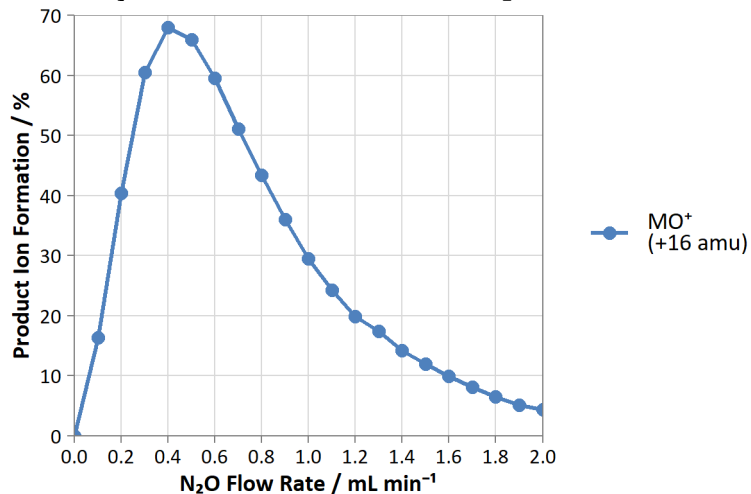

Major Product Ions of <sup>74</sup>Ge<sup>+</sup> with O<sub>2</sub> Reaction Gas

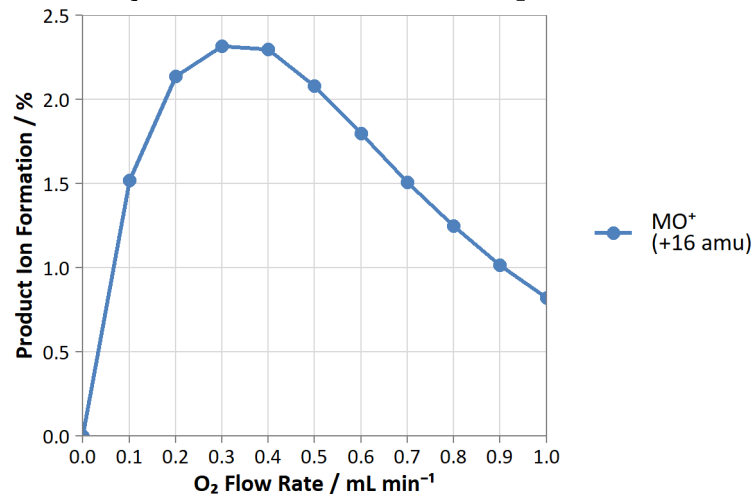

## On-Mass with N<sub>2</sub>O and O<sub>2</sub>

On-Mass Profile of <sup>74</sup>Ge<sup>+</sup> with N<sub>2</sub>O and O<sub>2</sub>

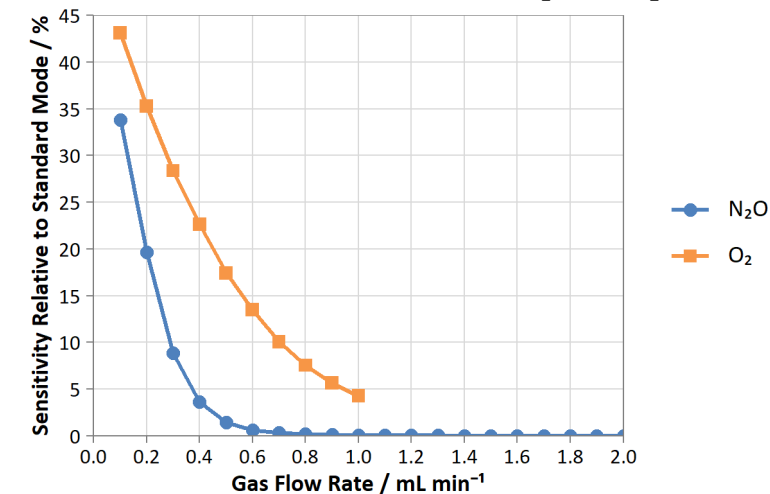

## On-Mass Removal (as Interference) with N<sub>2</sub>O

Variation of <sup>74</sup>Ge<sup>16</sup>O<sup>+</sup> Interference with N<sub>2</sub>O Flow Rate (On-Mass: Q1 = 90, Q3 = 90)

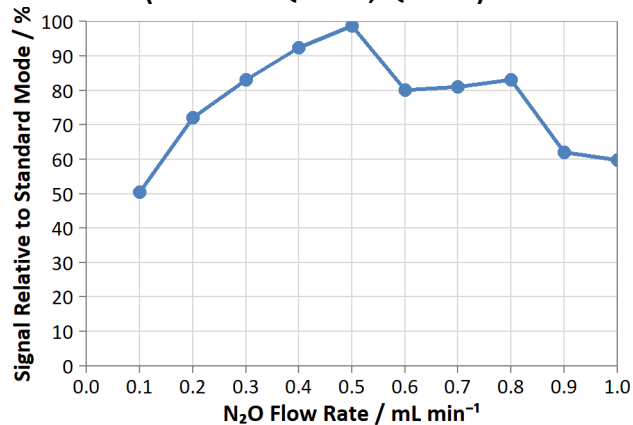

Variation of <sup>74</sup>Ge<sup>2+</sup> Interference with N<sub>2</sub>O Flow Rate (On-Mass: Q1 = 37, Q3 = 37)

[NOT MEASURED]

## Asymmetric Charge Transfer (with N<sub>2</sub>O)

Profile of Charge Transfer Reaction Between <sup>74</sup>Ge<sub>(m)</sub><sup>+</sup> and N<sub>2</sub>O

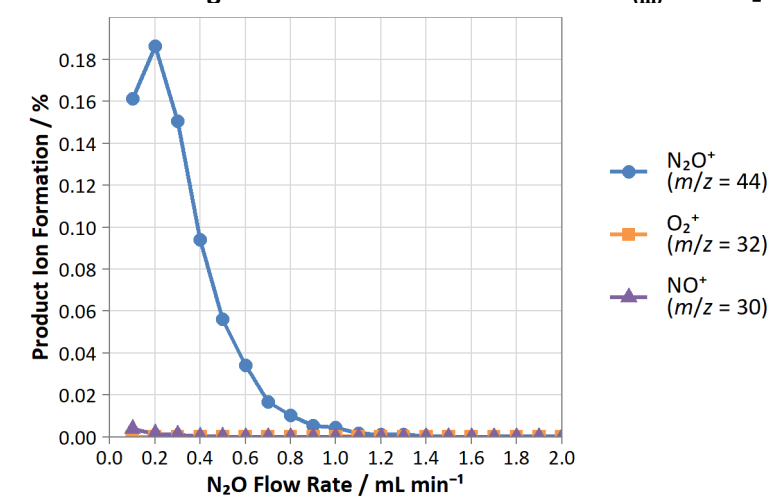

# Arsenic

Supplementary Information B to: Characterisation of gas cell reactions for 70+ elements using N<sub>2</sub>O for ICP tandem mass spectrometry measurements

Shaun T. Lancaster<sup>a\*</sup>, Thomas Prohaska<sup>ab</sup> and Johanna Irrgeher<sup>ab</sup>

<sup>a</sup>Department of General, Analytical and Physical Chemistry, Chair of General and Analytical Chemistry, Montanuniversität Leoben, Leoben, Austria.

<sup>b</sup>Department of Physics and Astronomy, University of Calgary, Calgary, Canada.

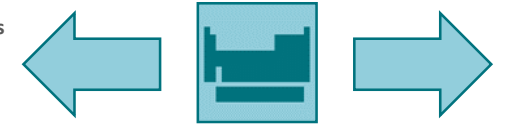

## Mass-Shift with N<sub>2</sub>O and O<sub>2</sub>

Major Product Ions of <sup>75</sup>As<sup>+</sup> with N<sub>2</sub>O Reaction Gas

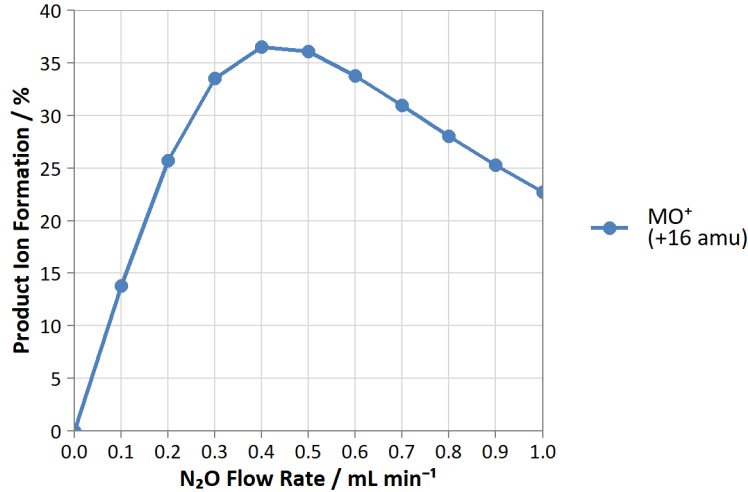

Major Product Ions of <sup>75</sup>As<sup>+</sup> with O<sub>2</sub> Reaction Gas

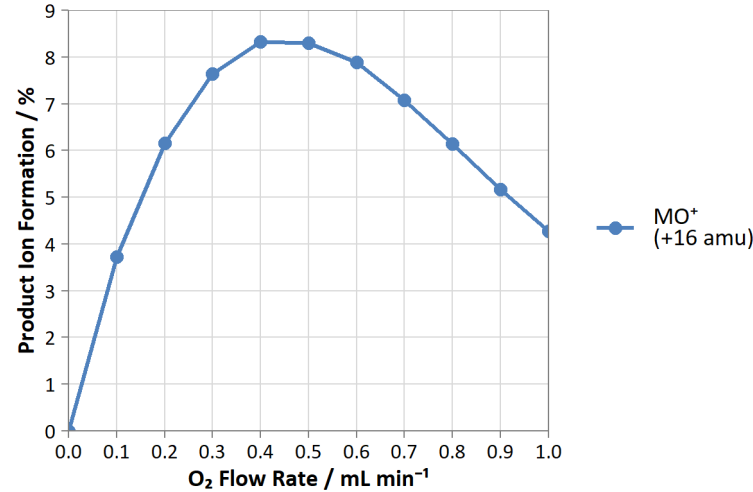

## On-Mass with N<sub>2</sub>O and O<sub>2</sub>

On-Mass Profile of <sup>75</sup>As<sup>+</sup> with N<sub>2</sub>O and O<sub>2</sub>

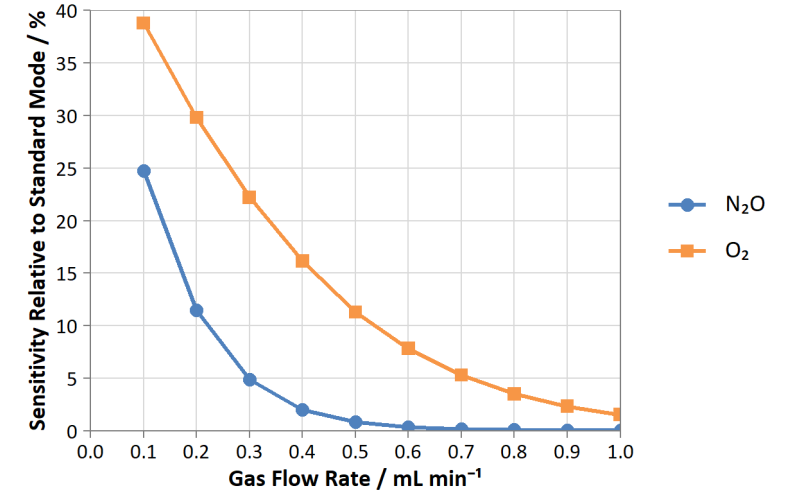

## On-Mass Removal (as Interference) with N<sub>2</sub>O

Variation of <sup>75</sup>As<sup>16</sup>O<sup>+</sup> Interference with N<sub>2</sub>O Flow Rate (On-Mass: Q1 = 91, Q3 = 91)

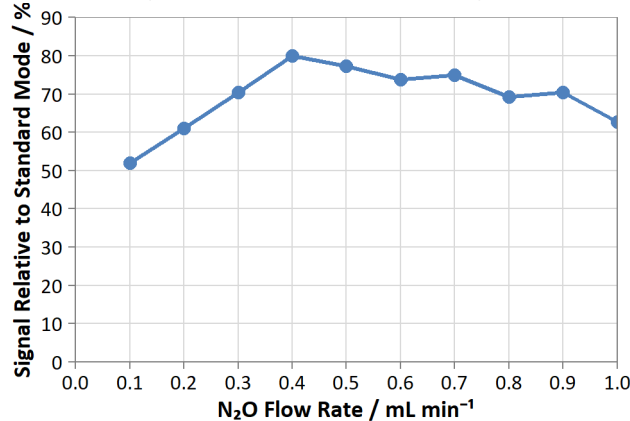

Variation of <sup>75</sup>As<sup>2+</sup> Interference with N<sub>2</sub>O Flow Rate (On-Mass: Q1 = 37.5, Q3 = 37.5)

[INSUFFICIENT DOUBLY-CHARGED ION FORMATION OBSERVED]

## Asymmetric Charge Transfer (with N<sub>2</sub>O)

Profile of Charge Transfer Reaction Between <sup>75</sup>As<sub>(m)</sub><sup>+</sup> and N<sub>2</sub>O

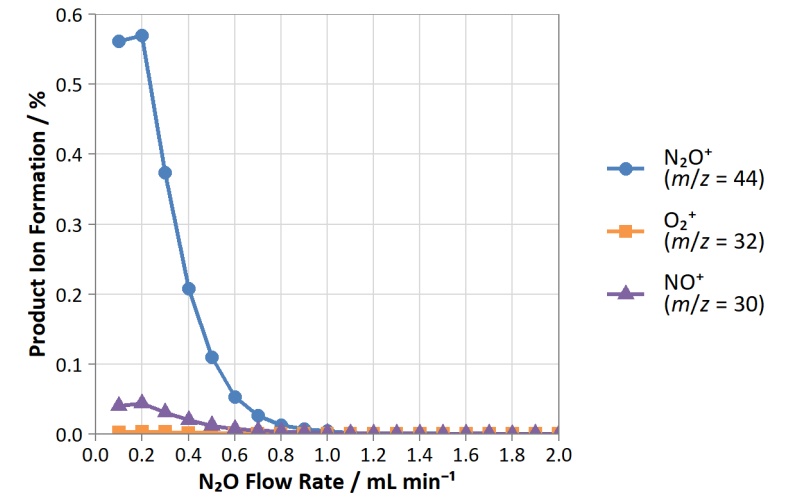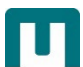

# Selenium

Supplementary Information B to: Characterisation of gas cell reactions for 70+ elements using N<sub>2</sub>O for ICP tandem mass spectrometry measurements

Shaun T. Lancaster<sup>a\*</sup>, Thomas Prohaska<sup>ab</sup> and Johanna Irrgeher<sup>ab</sup>

<sup>a</sup>Department of General, Analytical and Physical Chemistry, Chair of General and Analytical Chemistry, Montanuniversität Leoben, Leoben, Austria.

<sup>b</sup>Department of Physics and Astronomy, University of Calgary, Calgary, Canada.



## Mass-Shift with N<sub>2</sub>O and O<sub>2</sub>

Major Product Ions of <sup>82</sup>Se<sup>+</sup> with N<sub>2</sub>O Reaction Gas

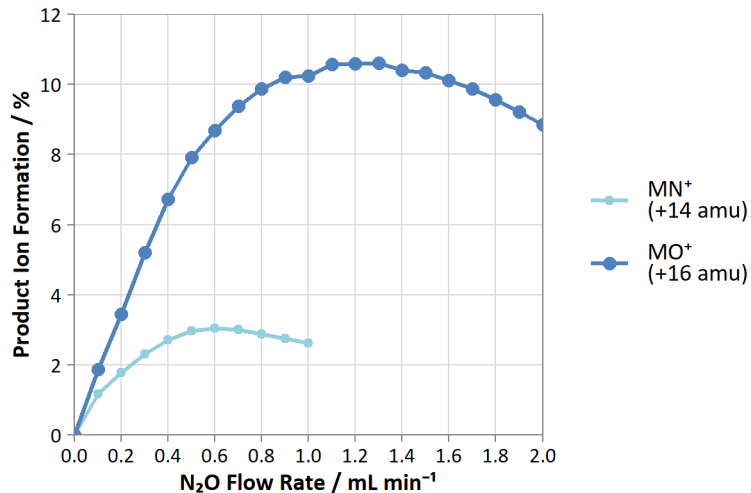

Major Product Ions of <sup>82</sup>Se<sup>+</sup> with O<sub>2</sub> Reaction Gas

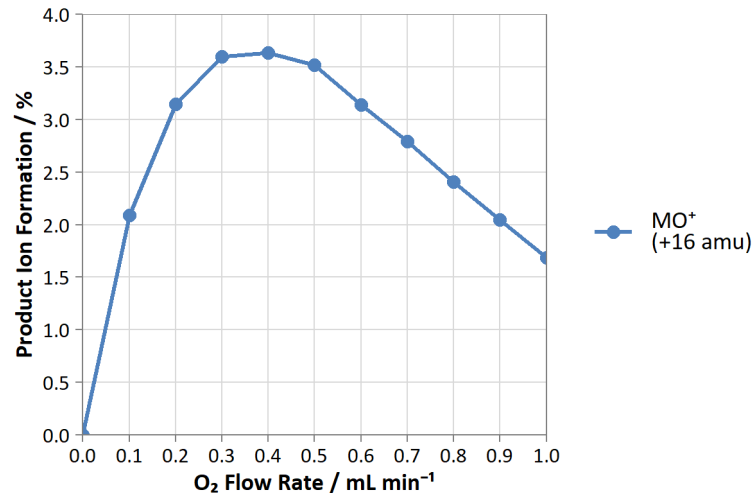

## On-Mass with N<sub>2</sub>O and O<sub>2</sub>

On-Mass Profile of <sup>82</sup>Se<sup>+</sup> with N<sub>2</sub>O and O<sub>2</sub>

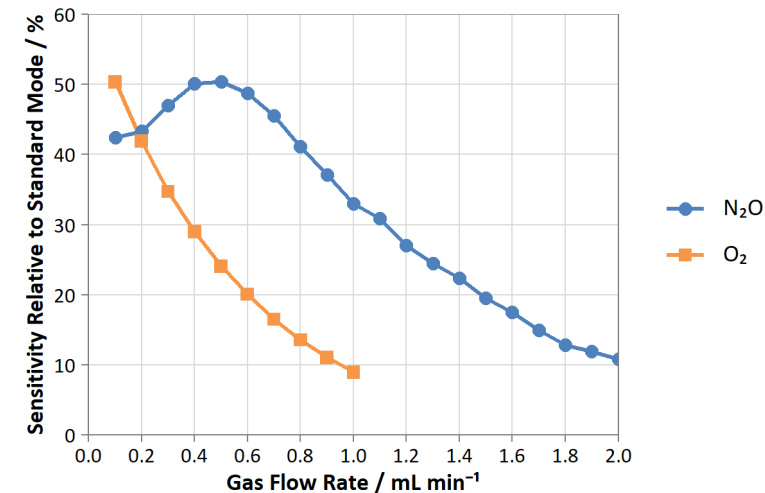

## On-Mass Removal (as Interference) with N<sub>2</sub>O

Variation of <sup>78</sup>Se<sup>16</sup>O<sup>+</sup> Interference with N<sub>2</sub>O Flow Rate (On-Mass: Q1 = 94, Q3 = 94)

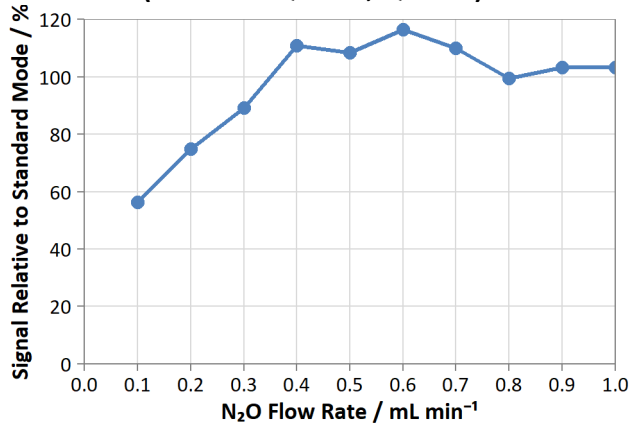

Variation of <sup>78</sup>Se<sup>2+</sup> Interference with N<sub>2</sub>O Flow Rate (On-Mass: Q1 = 39, Q3 = 39)

[NOT MEASURED]

## Asymmetric Charge Transfer (with N<sub>2</sub>O)

Profile of Charge Transfer Reaction Between <sup>78</sup>Se<sub>(m)</sub><sup>+</sup> and N<sub>2</sub>O

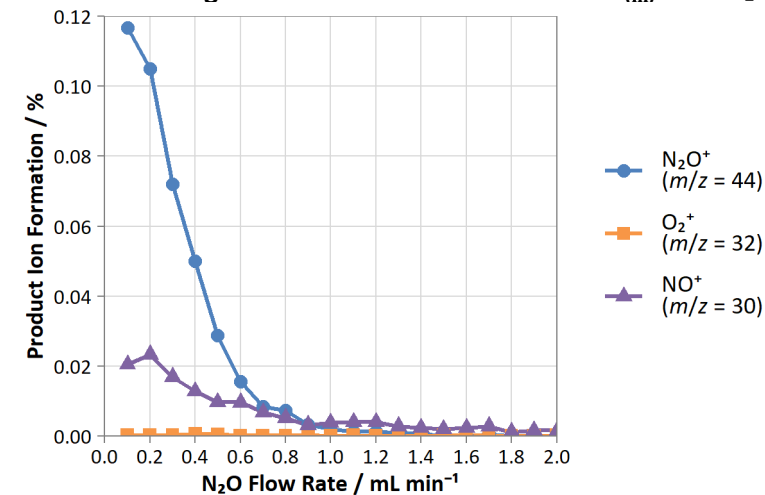

# Bromine

Supplementary Information B to: Characterisation of gas cell reactions for 70+ elements using N<sub>2</sub>O for ICP tandem mass spectrometry measurements

Shaun T. Lancaster<sup>a\*</sup>, Thomas Prohaska<sup>ab</sup> and Johanna Irrgeher<sup>ab</sup>

<sup>a</sup>Department of General, Analytical and Physical Chemistry, Chair of General and Analytical Chemistry, Montanuniversität Leoben, Leoben, Austria.

<sup>b</sup>Department of Physics and Astronomy, University of Calgary, Calgary, Canada.



## Mass-Shift with N<sub>2</sub>O and O<sub>2</sub>

Major Product Ions of <sup>81</sup>Br<sup>+</sup> with N<sub>2</sub>O Reaction Gas

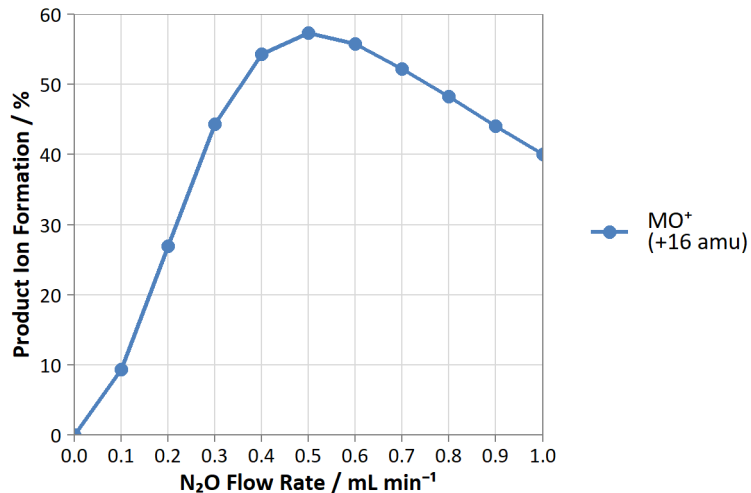

Major Product Ions of <sup>81</sup>Br<sup>+</sup> with O<sub>2</sub> Reaction Gas

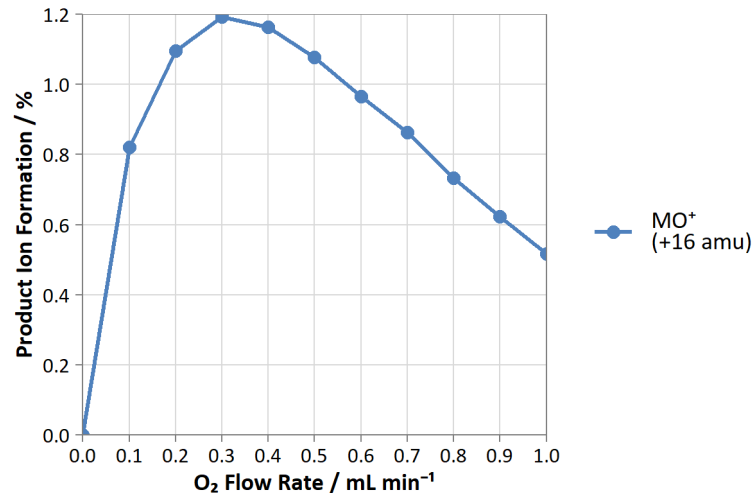

## On-Mass with N<sub>2</sub>O and O<sub>2</sub>

On-Mass Profile of <sup>81</sup>Br<sup>+</sup> with N<sub>2</sub>O and O<sub>2</sub>

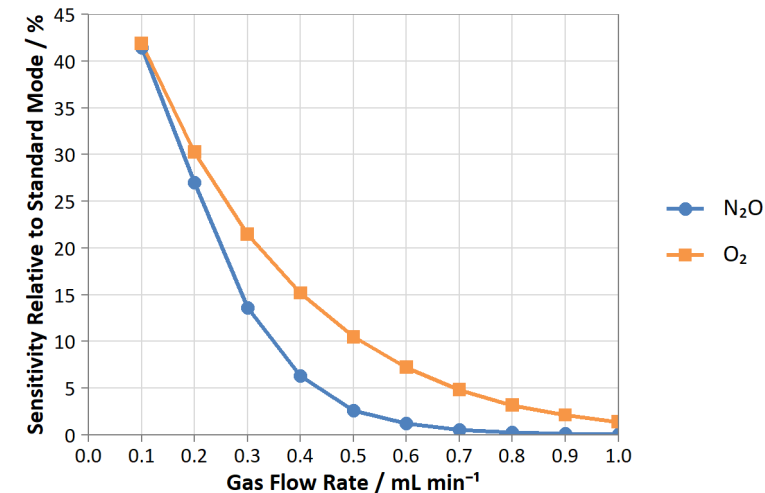

## On-Mass Removal (as Interference) with N<sub>2</sub>O

Variation of <sup>81</sup>Br<sup>16</sup>O<sup>+</sup> Interference with N<sub>2</sub>O Flow Rate (On-Mass: Q1 = 97, Q3 = 97)

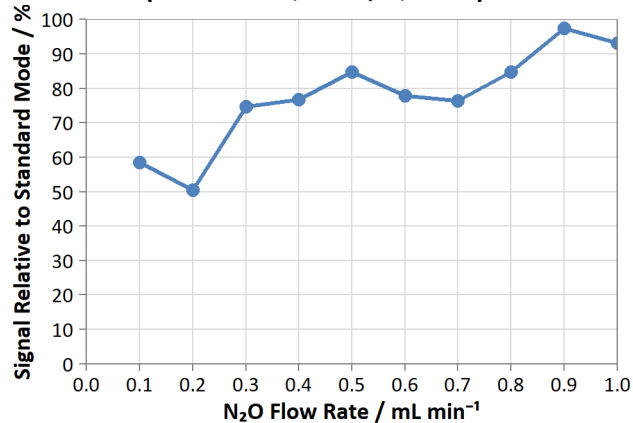

Variation of <sup>81</sup>Br<sup>2+</sup> Interference with N<sub>2</sub>O Flow Rate (On-Mass: Q1 = 40.5, Q3 = 40.5)

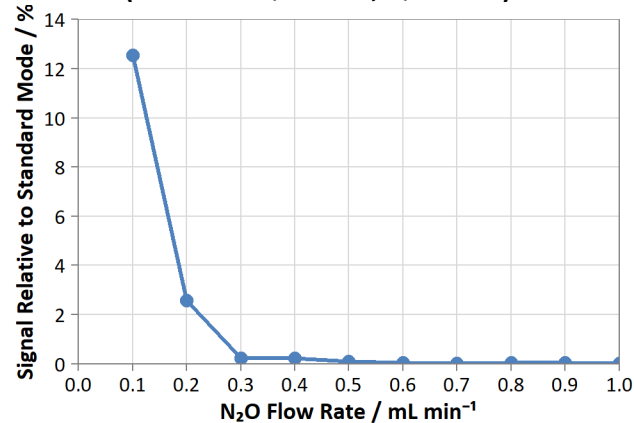

## Asymmetric Charge Transfer (with N<sub>2</sub>O)

Profile of Charge Transfer Reaction Between <sup>81</sup>Br<sub>(m)</sub><sup>+</sup> and N<sub>2</sub>O

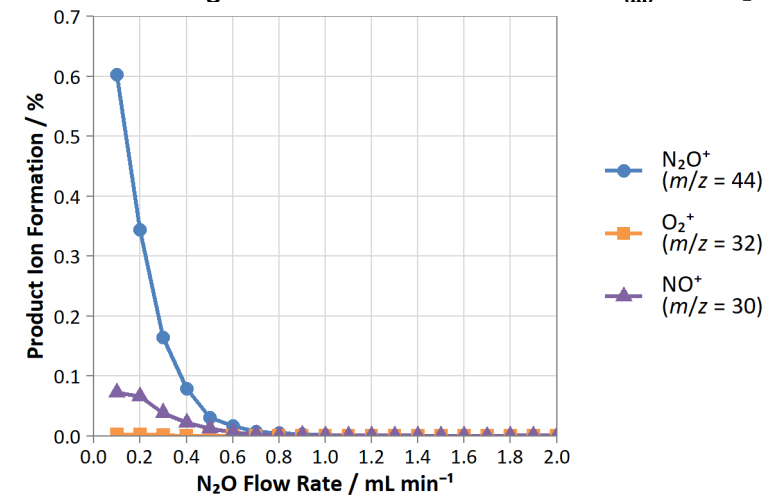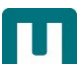

# Rubidium

Supplementary Information B to: Characterisation of gas cell reactions for 70+ elements using N<sub>2</sub>O for ICP tandem mass spectrometry measurements  
Shaun T. Lancaster<sup>a\*</sup>, Thomas Prohaska<sup>ab</sup> and Johanna Irrgeher<sup>ab</sup>  
<sup>a</sup>Department of General, Analytical and Physical Chemistry, Chair of General and Analytical Chemistry, Montanuniversität Leoben, Leoben, Austria.  
<sup>b</sup>Department of Physics and Astronomy, University of Calgary, Calgary, Canada.



## Mass-Shift with N<sub>2</sub>O and O<sub>2</sub>

Major Product Ions of <sup>85</sup>Rb<sup>+</sup> with N<sub>2</sub>O Reaction Gas

[NO ATOM TRANSFER  
REACTION OBSERVED]

Major Product Ions of <sup>85</sup>Rb<sup>+</sup> with O<sub>2</sub> Reaction Gas

[NO ATOM TRANSFER  
REACTION OBSERVED]

## On-Mass with N<sub>2</sub>O and O<sub>2</sub>

On-Mass Profile of <sup>85</sup>Rb<sup>+</sup> with N<sub>2</sub>O and O<sub>2</sub>

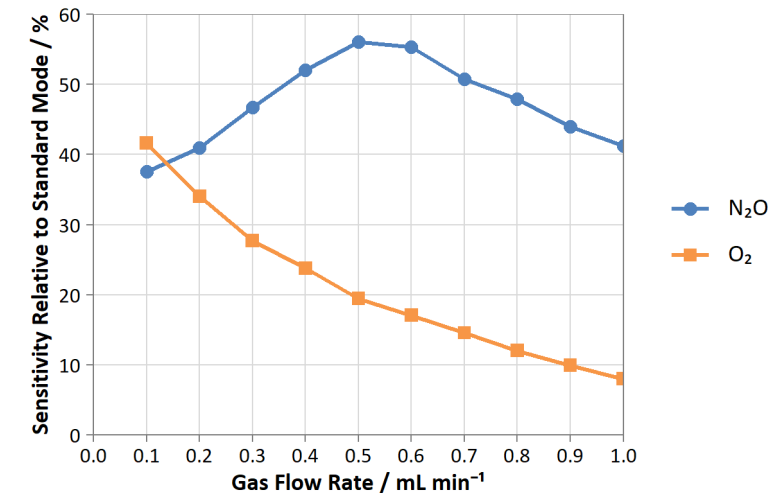

## On-Mass Removal (as Interference) with N<sub>2</sub>O

Variation of <sup>85</sup>Rb<sup>16</sup>O<sup>+</sup> Interference with  
N<sub>2</sub>O Flow Rate  
(On-Mass: Q1 = 101, Q3 = 101)

[INSUFFICIENT OXIDE  
FORMATION OBSERVED]

Variation of <sup>85</sup>Rb<sup>2+</sup> Interference with  
N<sub>2</sub>O Flow Rate  
(On-Mass: Q1 = 42.5, Q3 = 42.5)

[INSUFFICIENT DOUBLY-CHARGED  
ION FORMATION OBSERVED]

## Asymmetric Charge Transfer (with N<sub>2</sub>O)

[NO CHARGE TRANSFER  
REACTION OBSERVED]

# Strontium

Supplementary Information B to: Characterisation of gas cell reactions for 70+ elements using N<sub>2</sub>O for ICP tandem mass spectrometry measurements

Shaun T. Lancaster<sup>a\*</sup>, Thomas Prohaska<sup>ab</sup> and Johanna Irrgeher<sup>ab</sup>

<sup>a</sup>Department of General, Analytical and Physical Chemistry, Chair of General and Analytical Chemistry, Montanuniversität Leoben, Leoben, Austria.

<sup>b</sup>Department of Physics and Astronomy, University of Calgary, Calgary, Canada.



## Mass-Shift with N<sub>2</sub>O and O<sub>2</sub>

Major Product Ions of <sup>88</sup>Sr<sup>+</sup> with N<sub>2</sub>O Reaction Gas

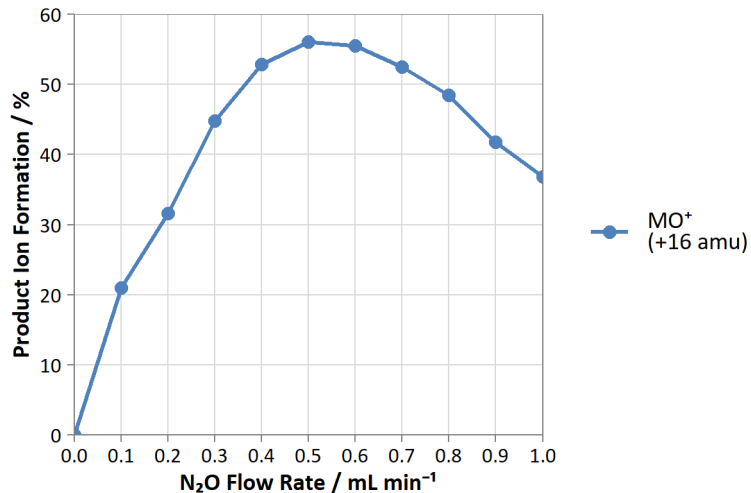

Major Product Ions of <sup>88</sup>Sr<sup>+</sup> with O<sub>2</sub> Reaction Gas

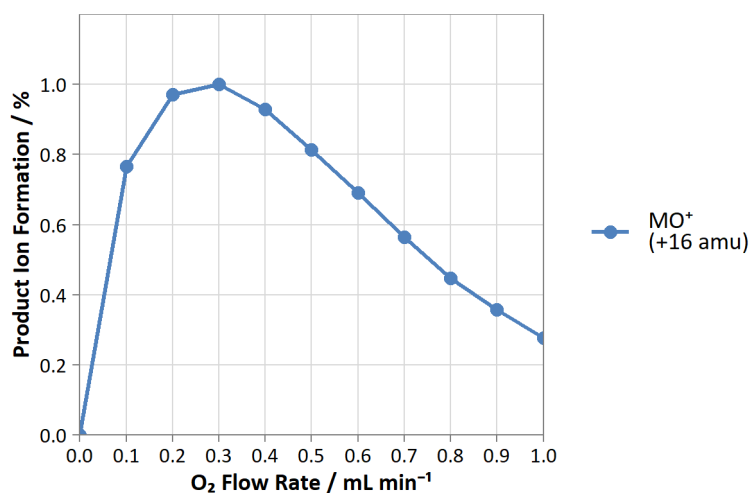

## On-Mass with N<sub>2</sub>O and O<sub>2</sub>

On-Mass Profile of <sup>88</sup>Sr<sup>+</sup> with N<sub>2</sub>O and O<sub>2</sub>

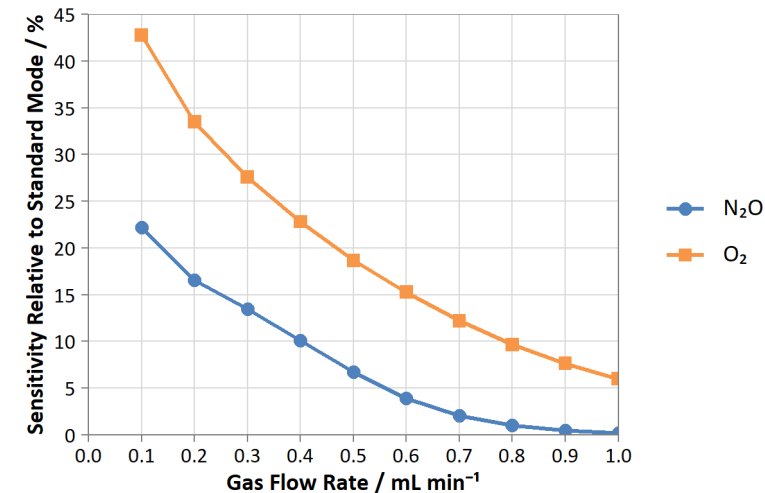

## On-Mass Removal (as Interference) with N<sub>2</sub>O

Variation of <sup>88</sup>Sr<sup>16</sup>O<sup>+</sup> Interference with N<sub>2</sub>O Flow Rate (On-Mass: Q1 = 104, Q3 = 104)

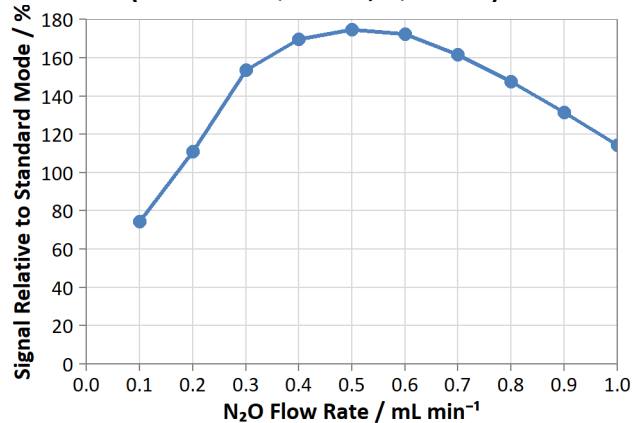

Variation of <sup>88</sup>Sr<sup>2+</sup> Interference with N<sub>2</sub>O Flow Rate (On-Mass: Q1 = 44, Q3 = 44)

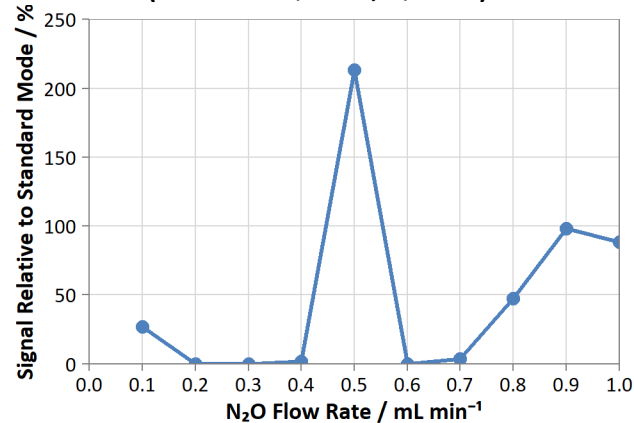

## Asymmetric Charge Transfer (with N<sub>2</sub>O)

[NO CHARGE TRANSFER REACTION OBSERVED]





## Mass-Shift with N<sub>2</sub>O and O<sub>2</sub>

Major Product Ions of <sup>89</sup>Y<sup>+</sup> with N<sub>2</sub>O Reaction Gas

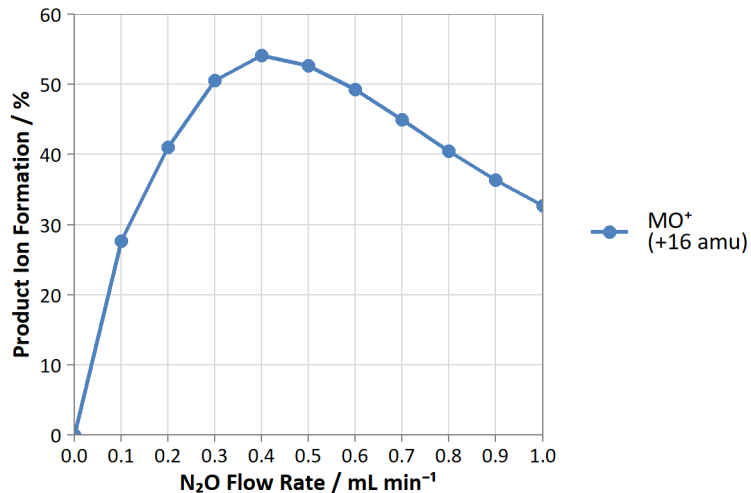

Major Product Ions of <sup>89</sup>Y<sup>+</sup> with O<sub>2</sub> Reaction Gas

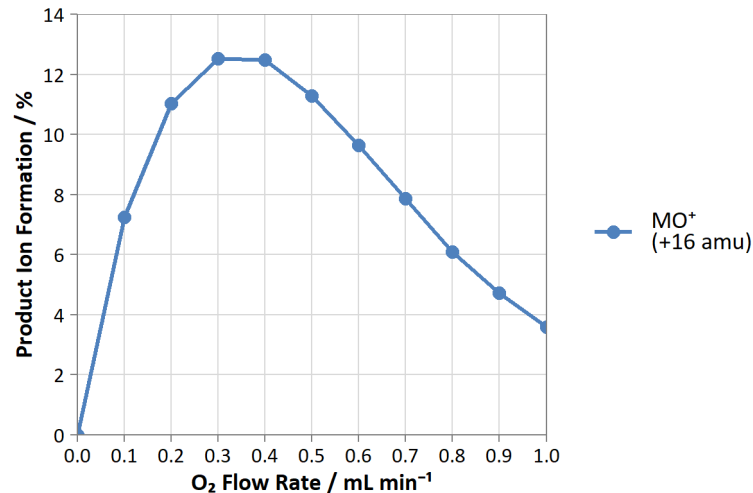

## On-Mass with N<sub>2</sub>O and O<sub>2</sub>

On-Mass Profile of <sup>89</sup>Y<sup>+</sup> with N<sub>2</sub>O and O<sub>2</sub>

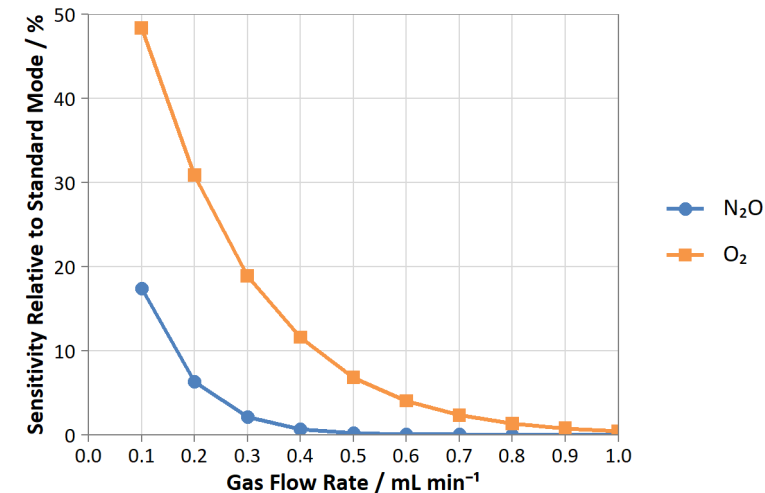

## On-Mass Removal (as Interference) with N<sub>2</sub>O

Variation of <sup>89</sup>Y<sup>16</sup>O<sup>+</sup> Interference with N<sub>2</sub>O Flow Rate (On-Mass: Q1 = 105, Q3 = 105)

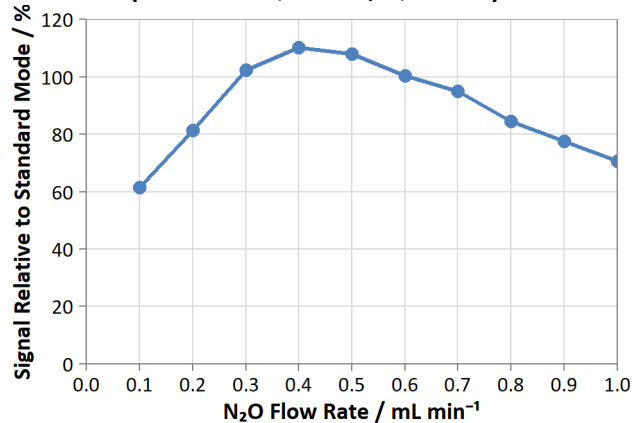

Variation of <sup>89</sup>Y<sup>2+</sup> Interference with N<sub>2</sub>O Flow Rate (On-Mass: Q1 = 44.5, Q3 = 44.5)

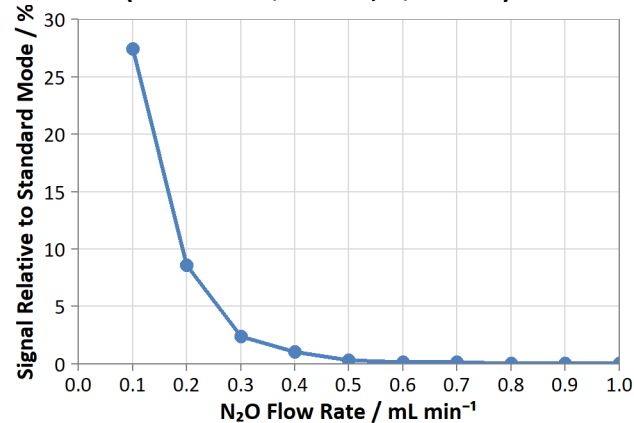

## Asymmetric Charge Transfer (with N<sub>2</sub>O)

[NO CHARGE TRANSFER REACTION OBSERVED]

# Zirconium

Supplementary Information B to: Characterisation of gas cell reactions for 70+ elements using N<sub>2</sub>O for ICP tandem mass spectrometry measurements

Shaun T. Lancaster<sup>a\*</sup>, Thomas Prohaska<sup>ab</sup> and Johanna Irrgeher<sup>ab</sup>

<sup>a</sup>Department of General, Analytical and Physical Chemistry, Chair of General and Analytical Chemistry, Montanuniversität Leoben, Leoben, Austria.

<sup>b</sup>Department of Physics and Astronomy, University of Calgary, Calgary, Canada.



## Mass-Shift with N<sub>2</sub>O and O<sub>2</sub>

Major Product Ions of <sup>90</sup>Zr<sup>+</sup> with N<sub>2</sub>O Reaction Gas

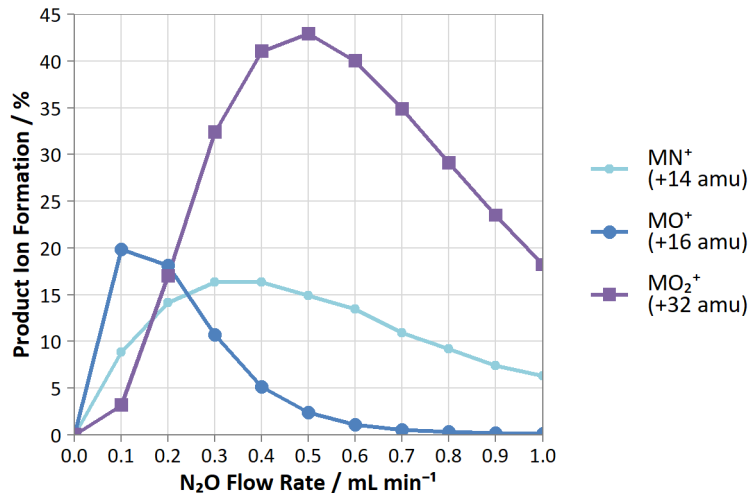

Major Product Ions of <sup>90</sup>Zr<sup>+</sup> with O<sub>2</sub> Reaction Gas

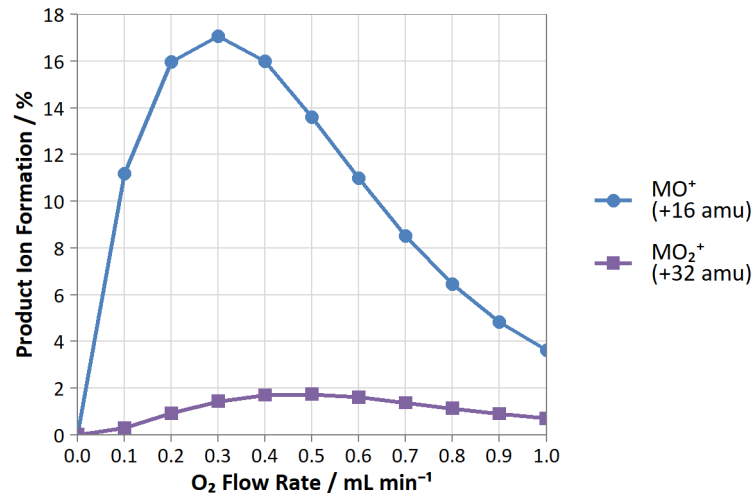

## On-Mass with N<sub>2</sub>O and O<sub>2</sub>

On-Mass Profile of <sup>90</sup>Zr<sup>+</sup> with N<sub>2</sub>O and O<sub>2</sub>

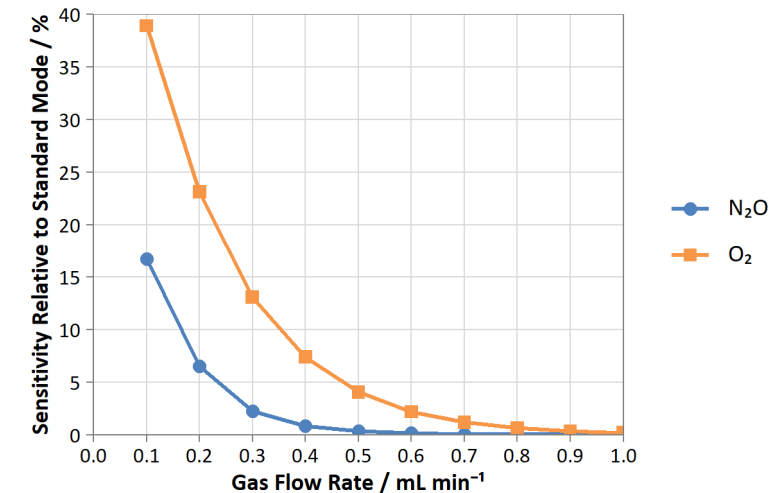

## On-Mass Removal (as Interference) with N<sub>2</sub>O

Variation of <sup>90</sup>Zr<sup>16</sup>O<sup>+</sup> Interference with N<sub>2</sub>O Flow Rate (On-Mass: Q1 = 106, Q3 = 106)

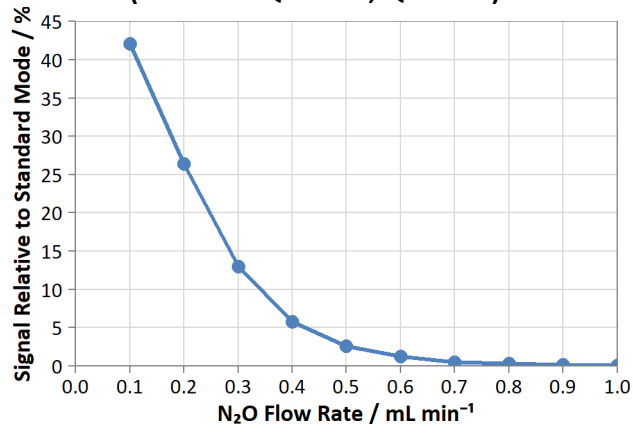

Variation of <sup>90</sup>Zr<sup>2+</sup> Interference with N<sub>2</sub>O Flow Rate (On-Mass: Q1 = 45, Q3 = 45)

[INSUFFICIENT DOUBLY-CHARGED ION FORMATION OBSERVED]

## Asymmetric Charge Transfer (with N<sub>2</sub>O)

[NO CHARGE TRANSFER REACTION OBSERVED]

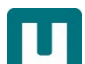



# Niobium

Supplementary Information B to: Characterisation of gas cell reactions for 70+ elements using N<sub>2</sub>O for ICP tandem mass spectrometry measurements

Shaun T. Lancaster<sup>a\*</sup>, Thomas Prohaska<sup>ab</sup> and Johanna Irrgeher<sup>ab</sup>

<sup>a</sup>Department of General, Analytical and Physical Chemistry, Chair of General and Analytical Chemistry, Montanuniversität Leoben, Leoben, Austria.

<sup>b</sup>Department of Physics and Astronomy, University of Calgary, Calgary, Canada.



## Mass-Shift with N<sub>2</sub>O and O<sub>2</sub>

Major Product Ions of <sup>93</sup>Nb<sup>+</sup> with N<sub>2</sub>O Reaction Gas

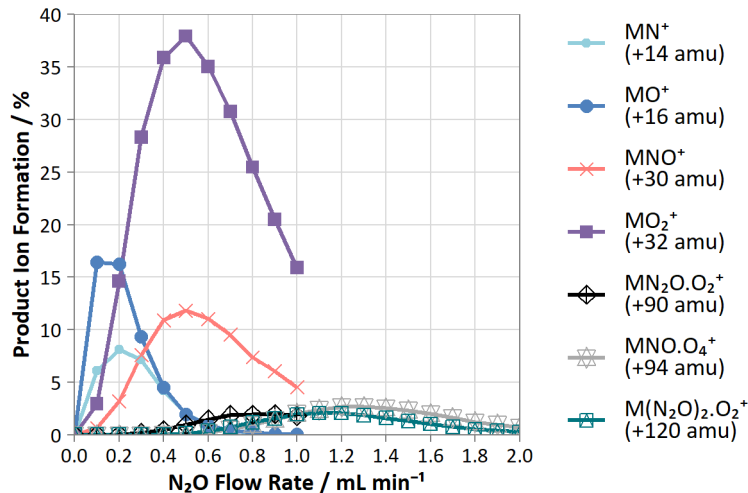

Major Product Ions of <sup>93</sup>Nb<sup>+</sup> with O<sub>2</sub> Reaction Gas

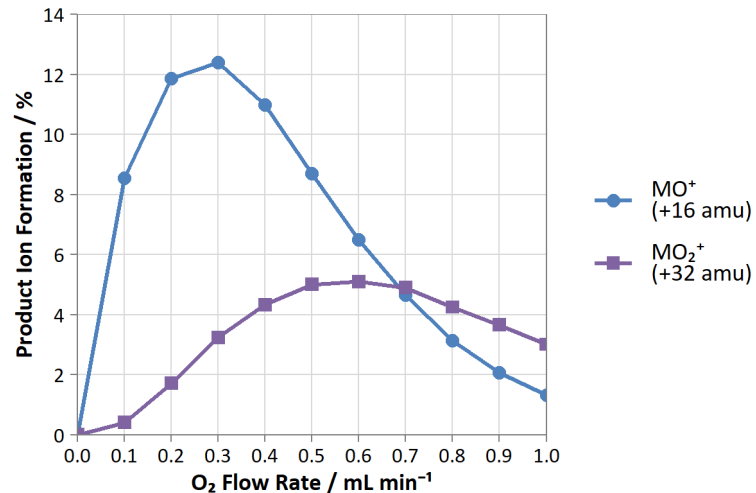

## On-Mass with N<sub>2</sub>O and O<sub>2</sub>

On-Mass Profile of <sup>93</sup>Nb<sup>+</sup> with N<sub>2</sub>O and O<sub>2</sub>

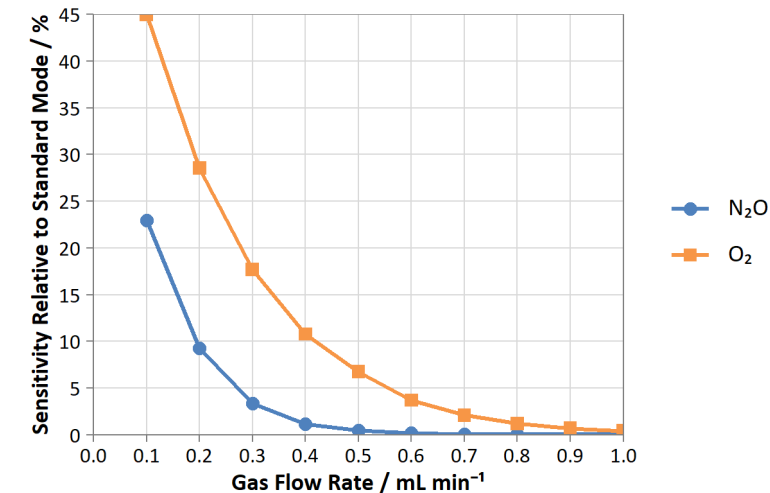

## On-Mass Removal (as Interference) with N<sub>2</sub>O

Variation of <sup>93</sup>Nb<sup>16</sup>O<sup>+</sup> Interference with N<sub>2</sub>O Flow Rate (On-Mass: Q1 = 109, Q3 = 109)

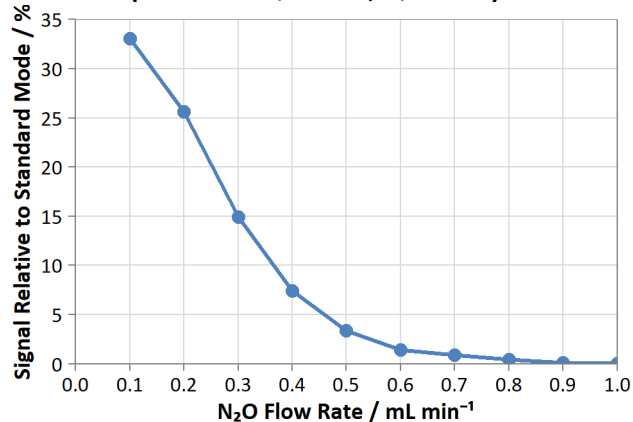

Variation of <sup>93</sup>Nb<sup>2+</sup> Interference with N<sub>2</sub>O Flow Rate (On-Mass: Q1 = 46.5, Q3 = 46.5)

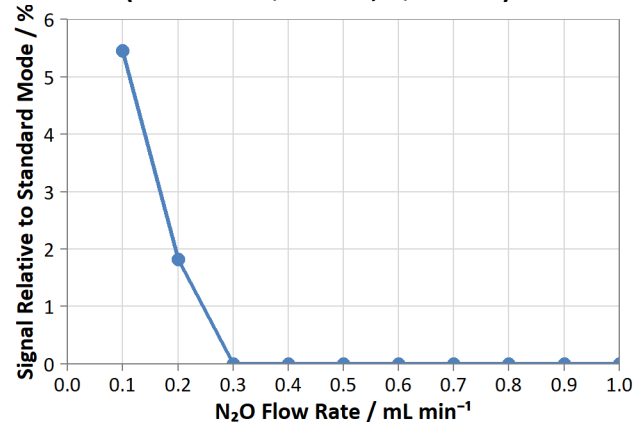

## Asymmetric Charge Transfer (with N<sub>2</sub>O)

[NO CHARGE TRANSFER REACTION OBSERVED]

# Molybdenum

Supplementary Information B to: Characterisation of gas cell reactions for 70+ elements using N<sub>2</sub>O for ICP tandem mass spectrometry measurements

Shaun T. Lancaster<sup>a\*</sup>, Thomas Prohaska<sup>ab</sup> and Johanna Irrgeher<sup>ab</sup>

<sup>a</sup>Department of General, Analytical and Physical Chemistry, Chair of General and Analytical Chemistry, Montanuniversität Leoben, Leoben, Austria.

<sup>b</sup>Department of Physics and Astronomy, University of Calgary, Calgary, Canada.



## Mass-Shift with N<sub>2</sub>O and O<sub>2</sub>

Major Product Ions of <sup>98</sup>Mo<sup>+</sup> with N<sub>2</sub>O Reaction Gas

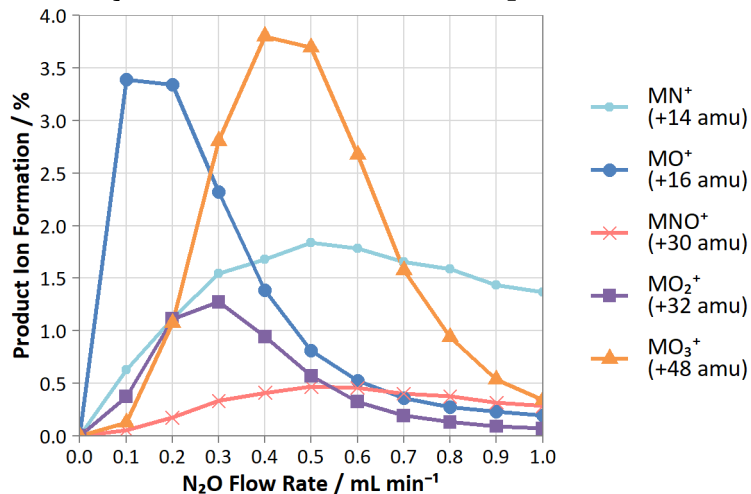

Major Product Ions of <sup>98</sup>Mo<sup>+</sup> with O<sub>2</sub> Reaction Gas

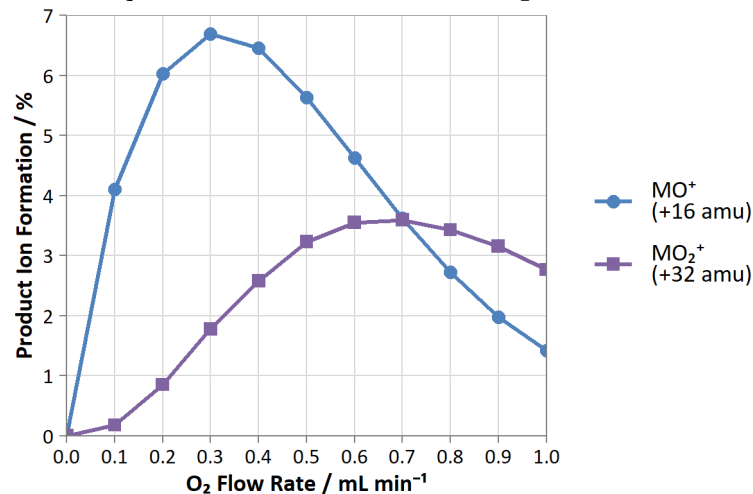

## On-Mass with N<sub>2</sub>O and O<sub>2</sub>

On-Mass Profile of <sup>98</sup>Mo<sup>+</sup> with N<sub>2</sub>O and O<sub>2</sub>

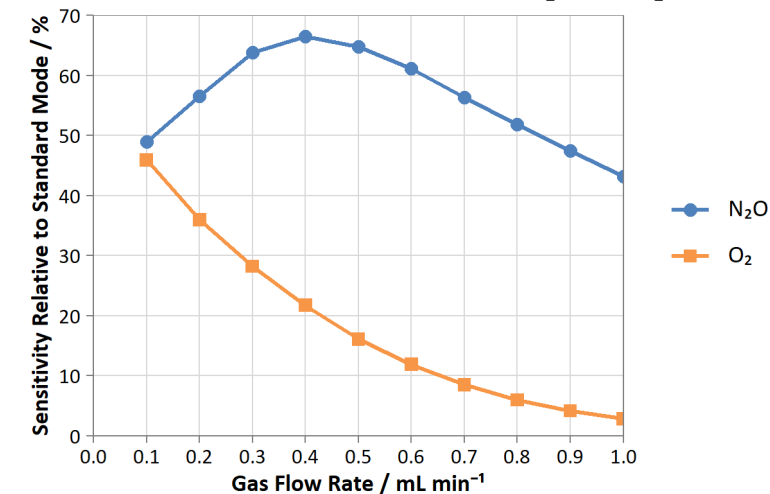

## On-Mass Removal (as Interference) with N<sub>2</sub>O

Variation of <sup>98</sup>Mo<sup>16</sup>O<sup>+</sup> Interference with N<sub>2</sub>O Flow Rate (On-Mass: Q1 = 114, Q3 = 114)

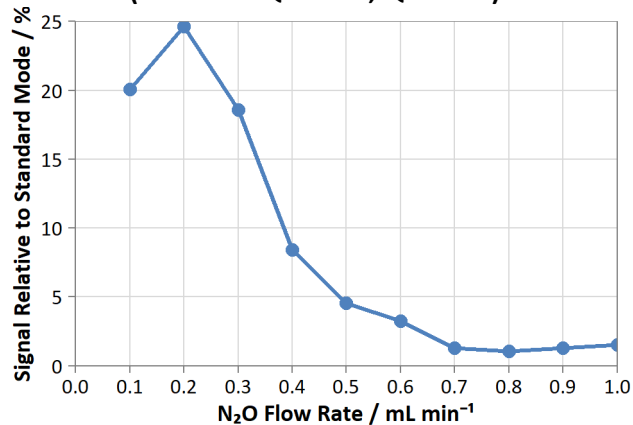

Variation of <sup>98</sup>Mo<sup>2+</sup> Interference with N<sub>2</sub>O Flow Rate (On-Mass: Q1 = 49, Q3 = 49)

[INSUFFICIENT DOUBLY-CHARGED ION FORMATION OBSERVED]

## Asymmetric Charge Transfer (with N<sub>2</sub>O)

[NO CHARGE TRANSFER REACTION OBSERVED]

# Ruthenium

Supplementary Information B to: Characterisation of gas cell reactions for 70+ elements using N<sub>2</sub>O for ICP tandem mass spectrometry measurements

Shaun T. Lancaster<sup>a\*</sup>, Thomas Prohaska<sup>ab</sup> and Johanna Irrgeher<sup>ab</sup>

<sup>a</sup>Department of General, Analytical and Physical Chemistry, Chair of General and Analytical Chemistry, Montanuniversität Leoben, Leoben, Austria.

<sup>b</sup>Department of Physics and Astronomy, University of Calgary, Calgary, Canada.



## Mass-Shift with N<sub>2</sub>O and O<sub>2</sub>

Major Product Ions of <sup>101</sup>Ru<sup>+</sup> with N<sub>2</sub>O Reaction Gas

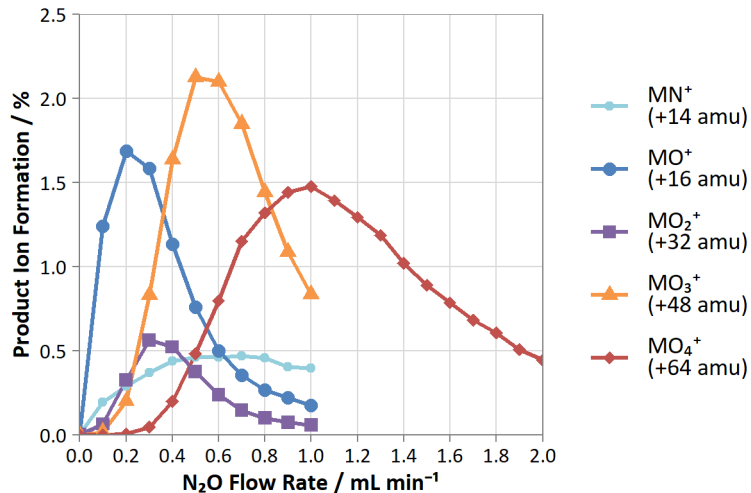

Major Product Ions of <sup>101</sup>Ru<sup>+</sup> with O<sub>2</sub> Reaction Gas

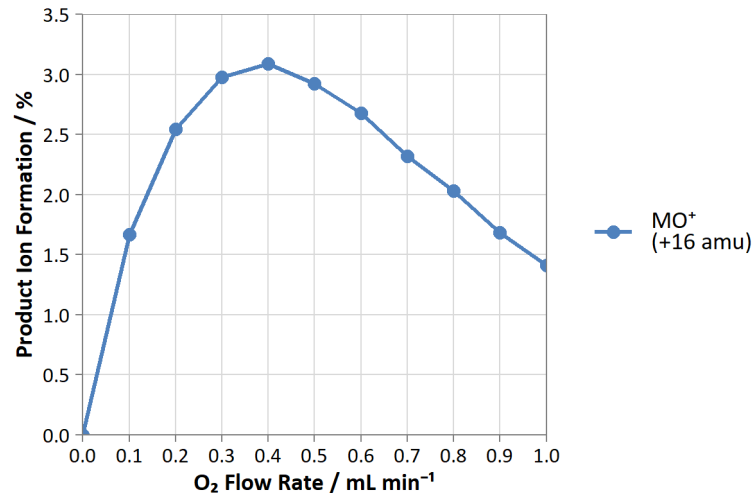

## On-Mass with N<sub>2</sub>O and O<sub>2</sub>

On-Mass Profile of <sup>101</sup>Ru<sup>+</sup> with N<sub>2</sub>O and O<sub>2</sub>

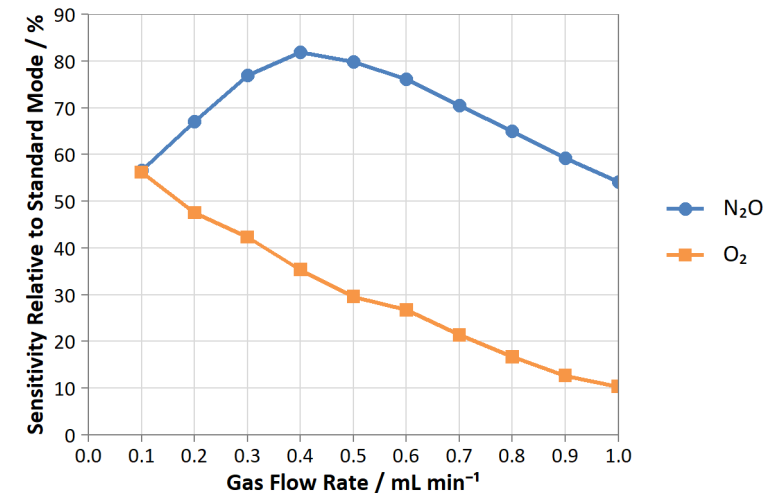

## On-Mass Removal (as Interference) with N<sub>2</sub>O

Variation of <sup>101</sup>Ru<sup>16</sup>O<sup>+</sup> Interference with N<sub>2</sub>O Flow Rate (On-Mass: Q1 = 117, Q3 = 117)

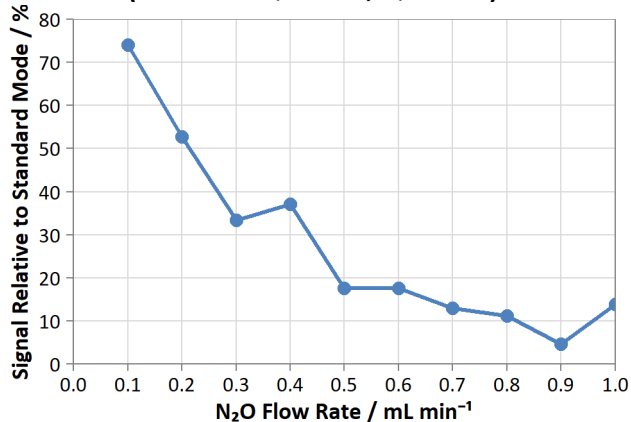

Variation of <sup>101</sup>Ru<sup>2+</sup> Interference with N<sub>2</sub>O Flow Rate (On-Mass: Q1 = 50.5, Q3 = 50.5)

[INSUFFICIENT DOUBLY-CHARGED ION FORMATION OBSERVED]

## Asymmetric Charge Transfer (with N<sub>2</sub>O)

[NO CHARGE TRANSFER REACTION OBSERVED]



# Rhodium

Supplementary Information B to: Characterisation of gas cell reactions for 70+ elements using N<sub>2</sub>O for ICP tandem mass spectrometry measurements

Shaun T. Lancaster<sup>a\*</sup>, Thomas Prohaska<sup>ab</sup> and Johanna Irrgeher<sup>ab</sup>

<sup>a</sup>Department of General, Analytical and Physical Chemistry, Chair of General and Analytical Chemistry, Montanuniversität Leoben, Leoben, Austria.

<sup>b</sup>Department of Physics and Astronomy, University of Calgary, Calgary, Canada.



## Mass-Shift with N<sub>2</sub>O and O<sub>2</sub>

Major Product Ions of <sup>103</sup>Rh<sup>+</sup> with N<sub>2</sub>O Reaction Gas

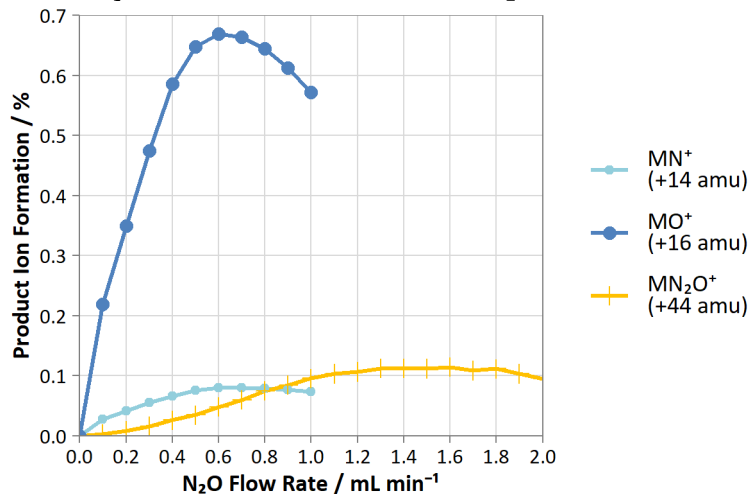

Major Product Ions of <sup>103</sup>Rh<sup>+</sup> with O<sub>2</sub> Reaction Gas

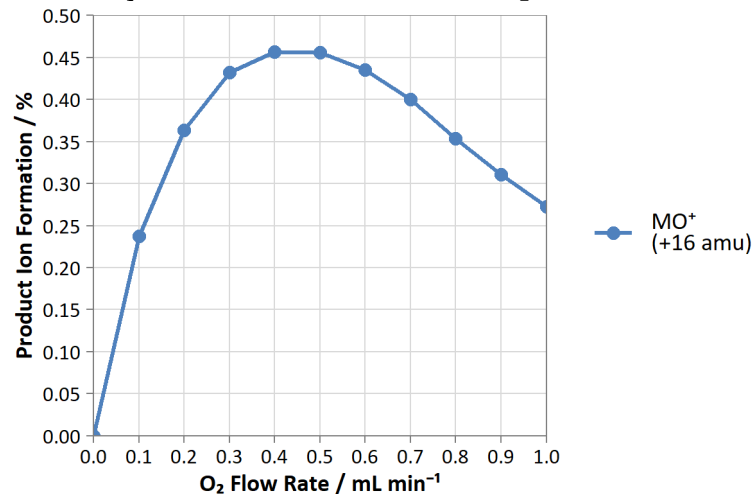

## On-Mass with N<sub>2</sub>O and O<sub>2</sub>

On-Mass Profile of <sup>103</sup>Rh<sup>+</sup> with N<sub>2</sub>O and O<sub>2</sub>

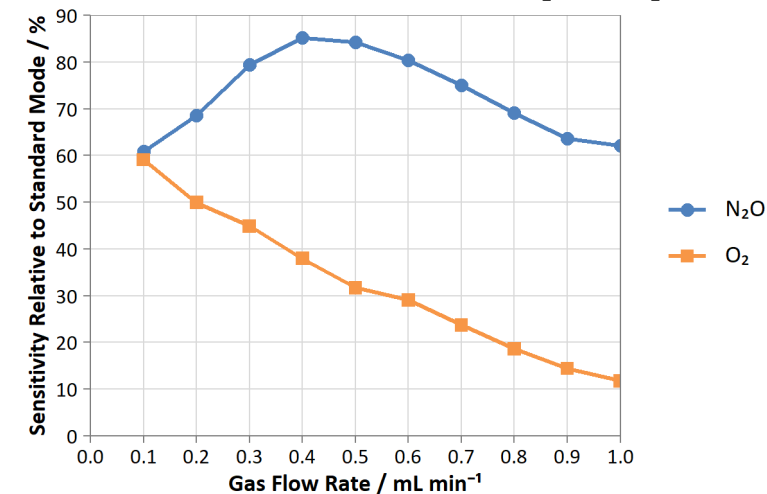

## On-Mass Removal (as Interference) with N<sub>2</sub>O

Variation of <sup>103</sup>Rh<sup>16</sup>O<sup>+</sup> Interference with N<sub>2</sub>O Flow Rate  
(On-Mass: Q1 = 119, Q3 = 119)

[INSUFFICIENT OXIDE FORMATION OBSERVED]

Variation of <sup>103</sup>Rh<sup>2+</sup> Interference with N<sub>2</sub>O Flow Rate  
(On-Mass: Q1 = 51.5, Q3 = 51.5)

[INSUFFICIENT DOUBLY-CHARGED ION FORMATION OBSERVED]

## Asymmetric Charge Transfer (with N<sub>2</sub>O)

[NO CHARGE TRANSFER REACTION OBSERVED]

# Palladium

Supplementary Information B to: Characterisation of gas cell reactions for 70+ elements using N<sub>2</sub>O for ICP tandem mass spectrometry measurements

Shaun T. Lancaster<sup>a\*</sup>, Thomas Prohaska<sup>ab</sup> and Johanna Irrgeher<sup>ab</sup>

<sup>a</sup>Department of General, Analytical and Physical Chemistry, Chair of General and Analytical Chemistry, Montanuniversität Leoben, Leoben, Austria.

<sup>b</sup>Department of Physics and Astronomy, University of Calgary, Calgary, Canada.



## Mass-Shift with N<sub>2</sub>O and O<sub>2</sub>

Major Product Ions of <sup>105</sup>Pd<sup>+</sup> with N<sub>2</sub>O Reaction Gas

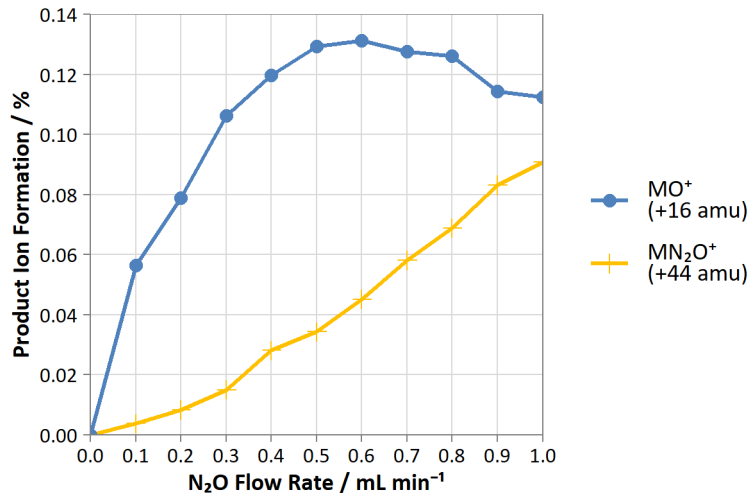

Major Product Ions of <sup>105</sup>Pd<sup>+</sup> with O<sub>2</sub> Reaction Gas

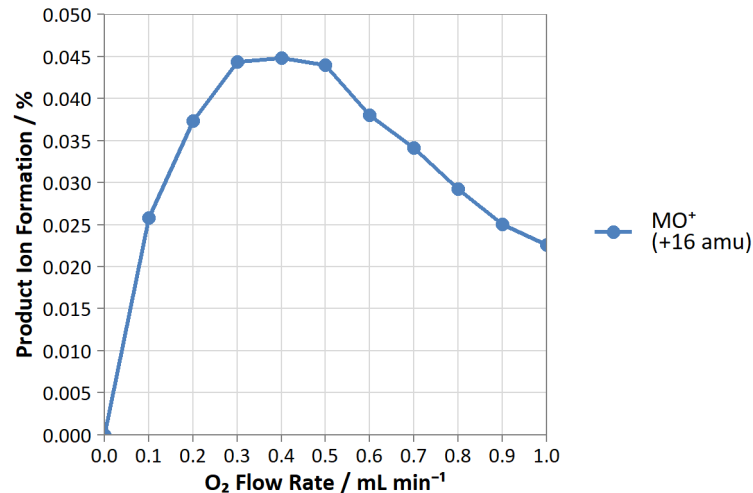

## On-Mass with N<sub>2</sub>O and O<sub>2</sub>

On-Mass Profile of <sup>105</sup>Pd<sup>+</sup> with N<sub>2</sub>O and O<sub>2</sub>

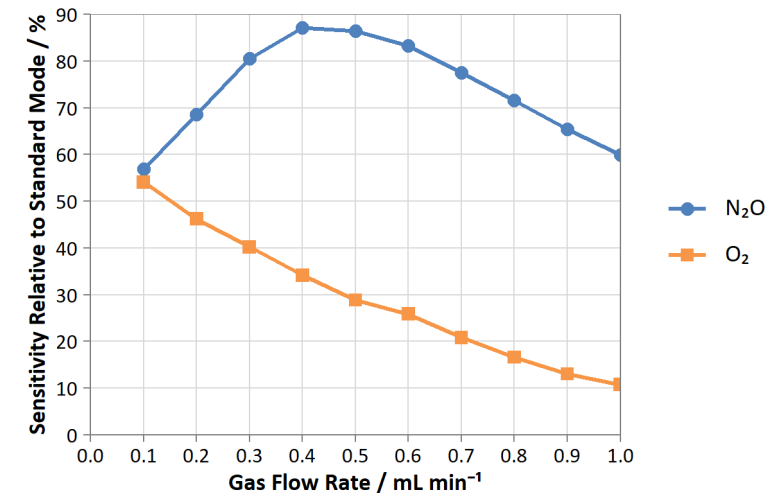

## On-Mass Removal (as Interference) with N<sub>2</sub>O

Variation of <sup>105</sup>Pd<sup>16</sup>O<sup>+</sup> Interference with N<sub>2</sub>O Flow Rate  
(On-Mass: Q1 = 121, Q3 = 121)

[INSUFFICIENT OXIDE FORMATION OBSERVED]

Variation of <sup>105</sup>Pd<sup>2+</sup> Interference with N<sub>2</sub>O Flow Rate  
(On-Mass: Q1 = 52.5, Q3 = 52.5)

[INSUFFICIENT DOUBLY-CHARGED ION FORMATION OBSERVED]

## Asymmetric Charge Transfer (with N<sub>2</sub>O)

[NO CHARGE TRANSFER REACTION OBSERVED]



## Mass-Shift with N<sub>2</sub>O and O<sub>2</sub>

Major Product Ions of <sup>107</sup>Ag<sup>+</sup> with N<sub>2</sub>O Reaction Gas

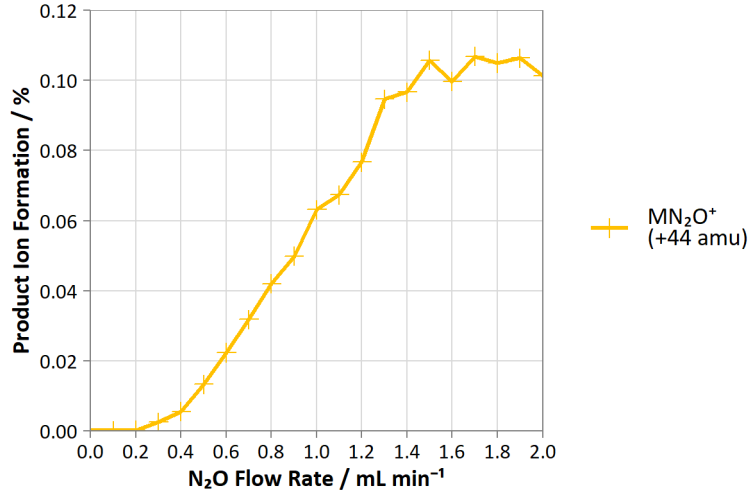

—+— MN<sub>2</sub>O<sup>+</sup>  
(+44 amu)

Major Product Ions of <sup>107</sup>Ag<sup>+</sup> with O<sub>2</sub> Reaction Gas

[NO ATOM TRANSFER  
REACTION OBSERVED]

## On-Mass with N<sub>2</sub>O and O<sub>2</sub>

On-Mass Profile of <sup>107</sup>Ag<sup>+</sup> with N<sub>2</sub>O and O<sub>2</sub>

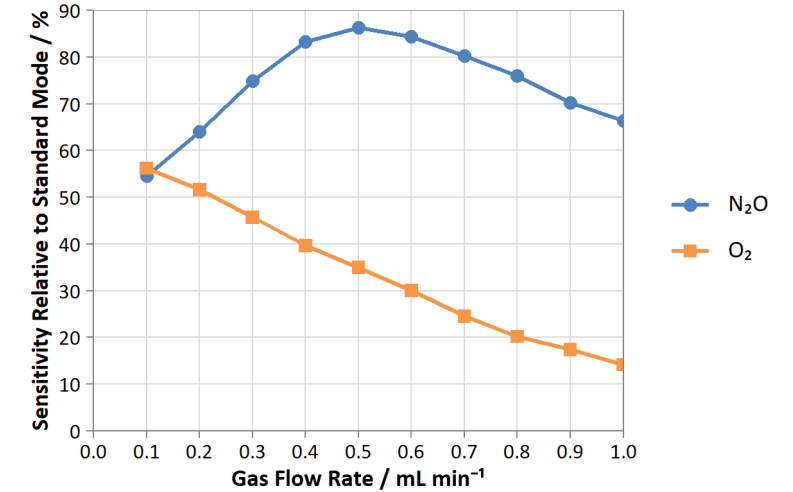

## On-Mass Removal (as Interference) with N<sub>2</sub>O

Variation of <sup>107</sup>Ag<sup>16</sup>O<sup>+</sup> Interference with  
N<sub>2</sub>O Flow Rate  
(On-Mass: Q1 = 123, Q3 = 123)

[INSUFFICIENT OXIDE  
FORMATION OBSERVED]

Variation of <sup>107</sup>Ag<sup>2+</sup> Interference with  
N<sub>2</sub>O Flow Rate  
(On-Mass: Q1 = 53.5, Q3 = 53.5)

[INSUFFICIENT DOUBLY-CHARGED  
ION FORMATION OBSERVED]

## Asymmetric Charge Transfer (with N<sub>2</sub>O)

[NO CHARGE TRANSFER  
REACTION OBSERVED]

# Cadmium

Supplementary Information B to: Characterisation of gas cell reactions for 70+ elements using N<sub>2</sub>O for ICP tandem mass spectrometry measurements

Shaun T. Lancaster<sup>a\*</sup>, Thomas Prohaska<sup>ab</sup> and Johanna Irrgeher<sup>ab</sup>

<sup>a</sup>Department of General, Analytical and Physical Chemistry, Chair of General and Analytical Chemistry, Montanuniversität Leoben, Leoben, Austria.

<sup>b</sup>Department of Physics and Astronomy, University of Calgary, Calgary, Canada.



## Mass-Shift with N<sub>2</sub>O and O<sub>2</sub>

Major Product Ions of <sup>114</sup>Cd<sup>+</sup> with N<sub>2</sub>O Reaction Gas

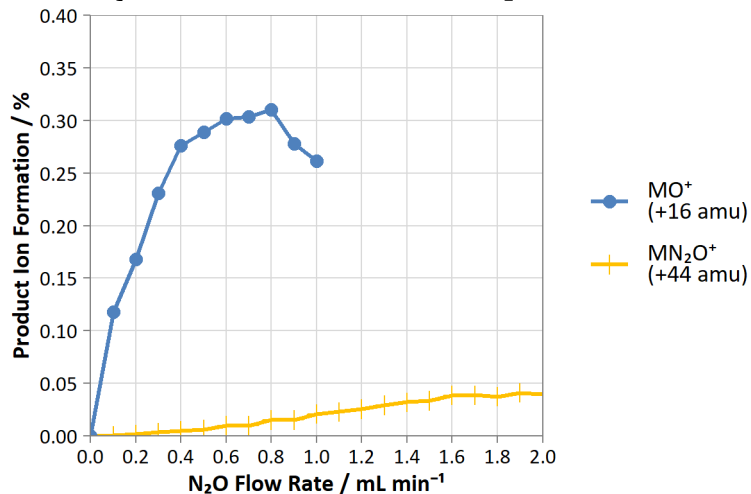

Major Product Ions of <sup>114</sup>Cd<sup>+</sup> with O<sub>2</sub> Reaction Gas

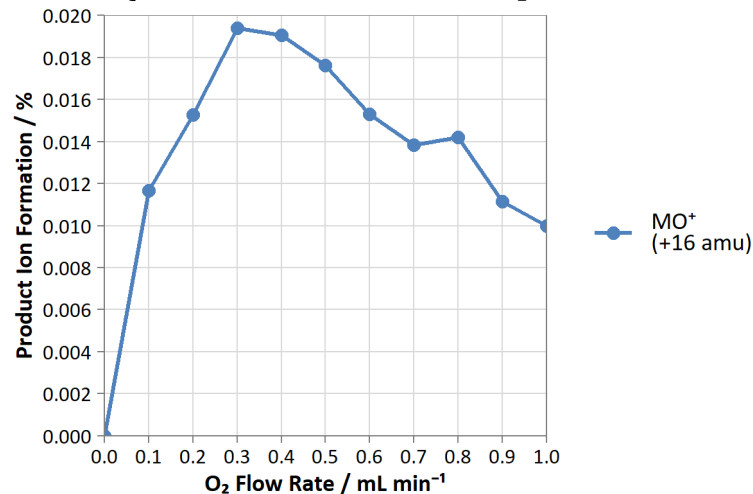

## On-Mass with N<sub>2</sub>O and O<sub>2</sub>

On-Mass Profile of <sup>114</sup>Cd<sup>+</sup> with N<sub>2</sub>O and O<sub>2</sub>

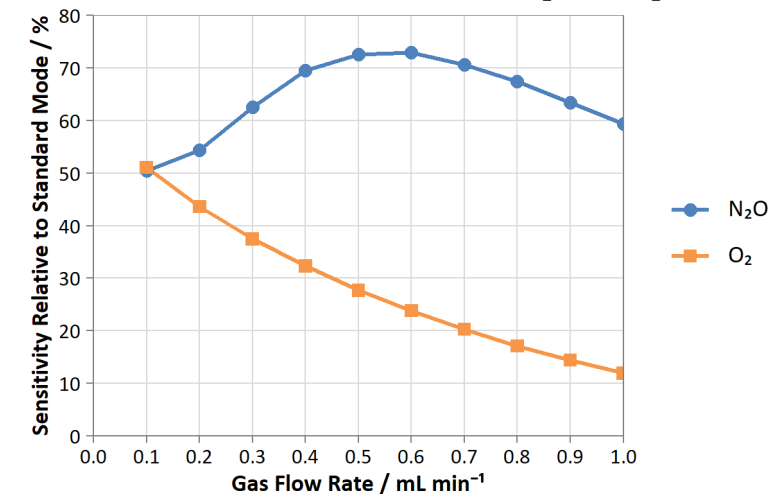

## On-Mass Removal (as Interference) with N<sub>2</sub>O

Variation of <sup>114</sup>Cd<sup>16</sup>O<sup>+</sup> Interference with N<sub>2</sub>O Flow Rate (On-Mass: Q1 = 130, Q3 = 130)

[INSUFFICIENT OXIDE FORMATION OBSERVED]

Variation of <sup>114</sup>Cd<sup>2+</sup> Interference with N<sub>2</sub>O Flow Rate (On-Mass: Q1 = 57, Q3 = 57)

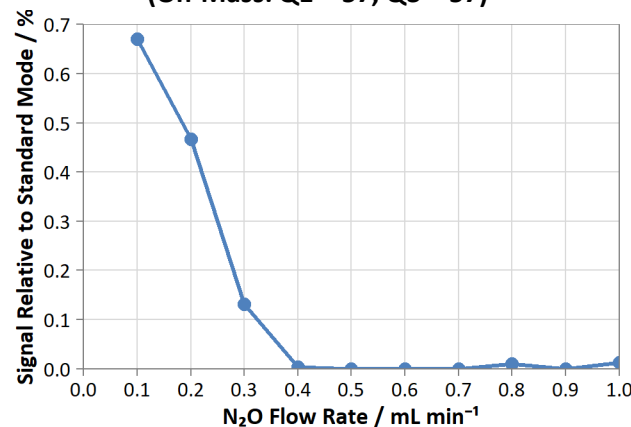

## Asymmetric Charge Transfer (with N<sub>2</sub>O)

[NO CHARGE TRANSFER REACTION OBSERVED]



## Mass-Shift with N<sub>2</sub>O and O<sub>2</sub>

Major Product Ions of <sup>115</sup>In<sup>+</sup> with N<sub>2</sub>O Reaction Gas

[NO ATOM TRANSFER  
REACTION OBSERVED]

Major Product Ions of <sup>115</sup>In<sup>+</sup> with O<sub>2</sub> Reaction Gas

[NO ATOM TRANSFER  
REACTION OBSERVED]

## On-Mass with N<sub>2</sub>O and O<sub>2</sub>

On-Mass Profile of <sup>115</sup>In<sup>+</sup> with N<sub>2</sub>O and O<sub>2</sub>

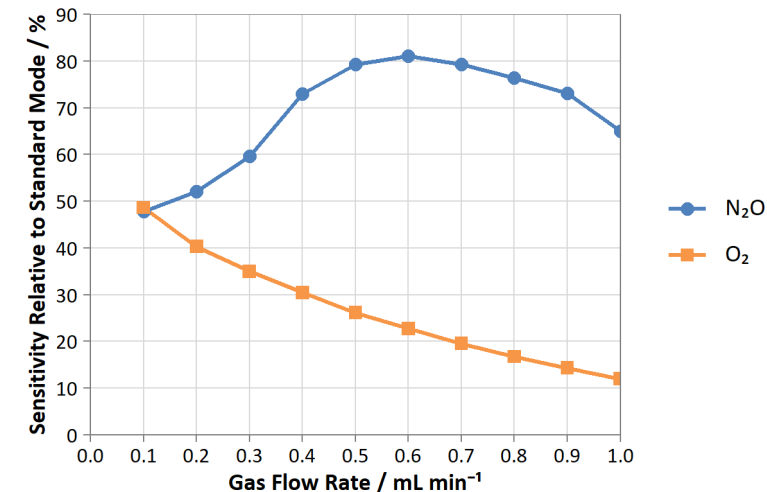

## On-Mass Removal (as Interference) with N<sub>2</sub>O

Variation of <sup>115</sup>In<sup>16</sup>O<sup>+</sup> Interference with  
N<sub>2</sub>O Flow Rate  
(On-Mass: Q1 = 131, Q3 = 131)

[INSUFFICIENT OXIDE  
FORMATION OBSERVED]

Variation of <sup>115</sup>In<sup>2+</sup> Interference with  
N<sub>2</sub>O Flow Rate  
(On-Mass: Q1 = 57.5, Q3 = 57.5)

[INSUFFICIENT DOUBLY-CHARGED  
ION FORMATION OBSERVED]

## Asymmetric Charge Transfer (with N<sub>2</sub>O)

[NO CHARGE TRANSFER  
REACTION OBSERVED]





## Mass-Shift with N<sub>2</sub>O and O<sub>2</sub>

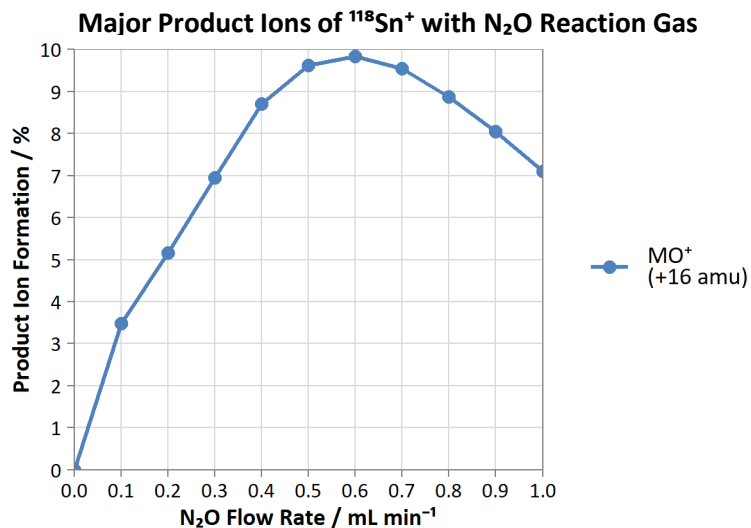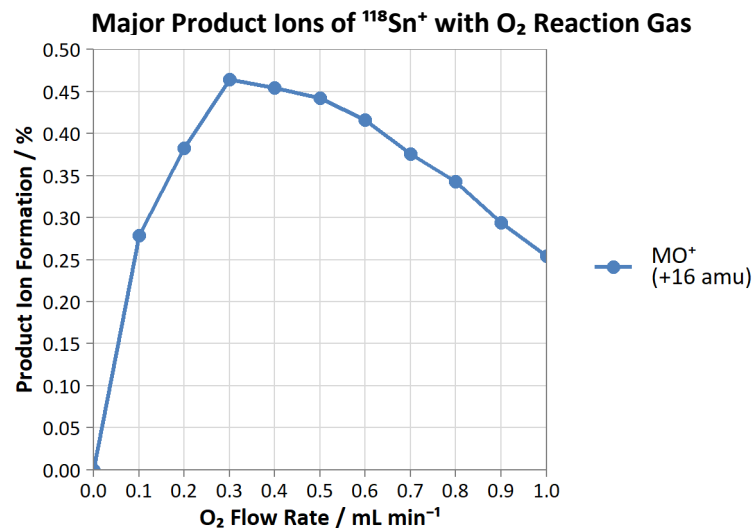

## On-Mass with N<sub>2</sub>O and O<sub>2</sub>

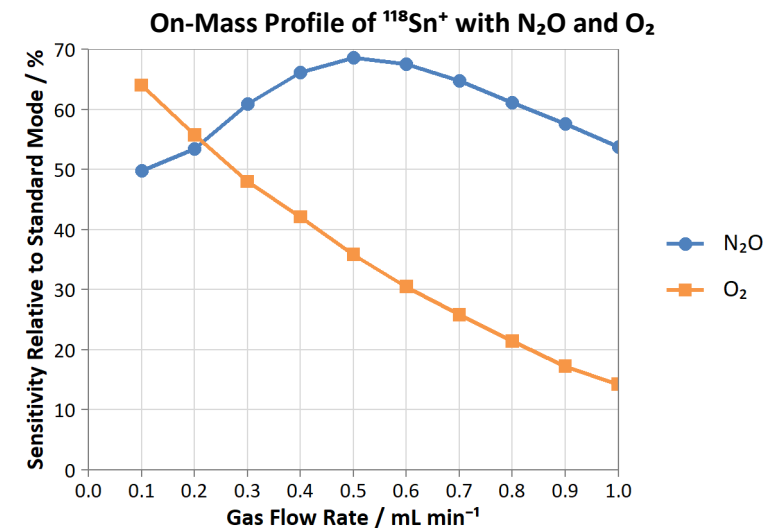

## On-Mass Removal (as Interference) with N<sub>2</sub>O

Variation of <sup>118</sup>Sn<sup>16</sup>O<sup>+</sup> Interference with N<sub>2</sub>O Flow Rate  
 (On-Mass: Q1 = 134, Q3 = 134)

[INSUFFICIENT OXIDE FORMATION OBSERVED]

Variation of <sup>118</sup>Sn<sup>2+</sup> Interference with N<sub>2</sub>O Flow Rate  
 (On-Mass: Q1 = 59, Q3 = 59)

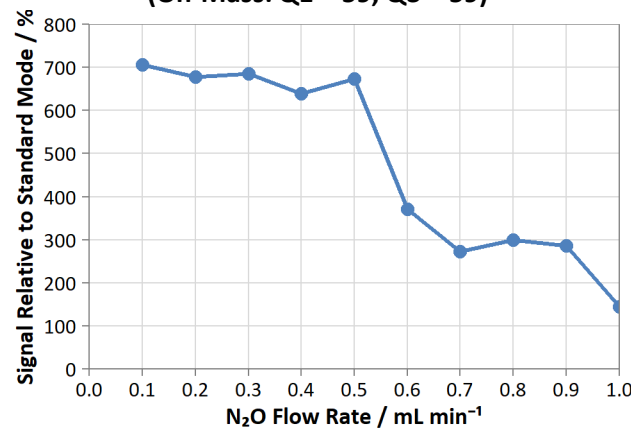

## Asymmetric Charge Transfer (with N<sub>2</sub>O)

[NO CHARGE TRANSFER REACTION OBSERVED]

# Antimony

Supplementary Information B to: Characterisation of gas cell reactions for 70+ elements using N<sub>2</sub>O for ICP tandem mass spectrometry measurements

Shaun T. Lancaster<sup>a\*</sup>, Thomas Prohaska<sup>ab</sup> and Johanna Irrgeher<sup>ab</sup>

<sup>a</sup>Department of General, Analytical and Physical Chemistry, Chair of General and Analytical Chemistry, Montanuniversität Leoben, Leoben, Austria.

<sup>b</sup>Department of Physics and Astronomy, University of Calgary, Calgary, Canada.



## Mass-Shift with N<sub>2</sub>O and O<sub>2</sub>

Major Product Ions of <sup>121</sup>Sb<sup>+</sup> with N<sub>2</sub>O Reaction Gas

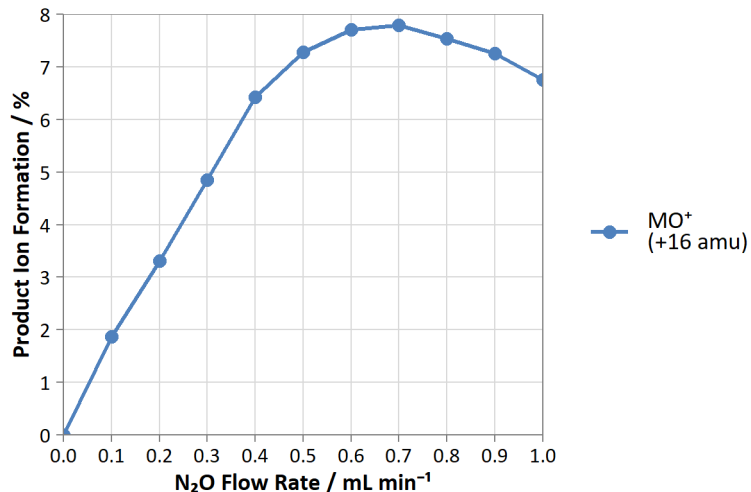

Major Product Ions of <sup>121</sup>Sb<sup>+</sup> with O<sub>2</sub> Reaction Gas

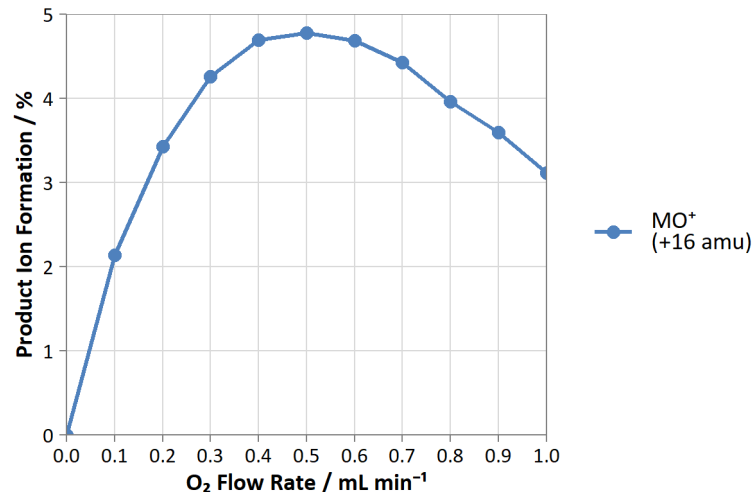

## On-Mass with N<sub>2</sub>O and O<sub>2</sub>

On-Mass Profile of <sup>121</sup>Sb<sup>+</sup> with N<sub>2</sub>O and O<sub>2</sub>

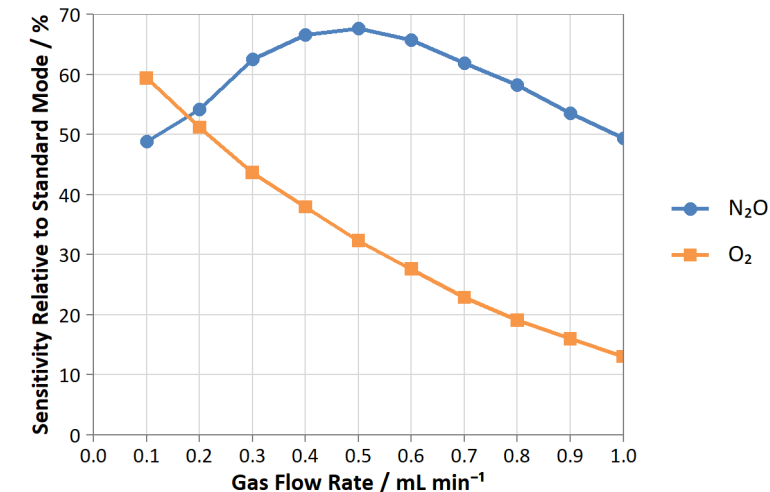

## On-Mass Removal (as Interference) with N<sub>2</sub>O

Variation of <sup>121</sup>Sb<sup>16</sup>O<sup>+</sup> Interference with N<sub>2</sub>O Flow Rate  
(On-Mass: Q1 = 137, Q3 = 137)

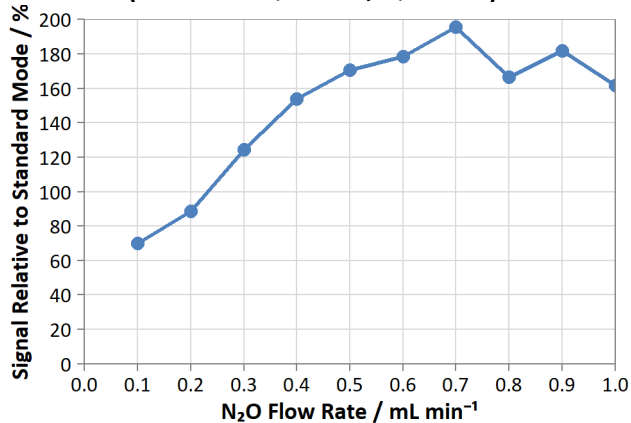

Variation of <sup>121</sup>Sb<sup>2+</sup> Interference with N<sub>2</sub>O Flow Rate  
(On-Mass: Q1 = 60.5, Q3 = 60.5)

[INSUFFICIENT DOUBLY-CHARGED ION FORMATION OBSERVED]

## Asymmetric Charge Transfer (with N<sub>2</sub>O)

[NO CHARGE TRANSFER REACTION OBSERVED]

# Tellurium

Supplementary Information B to: Characterisation of gas cell reactions for 70+ elements using N<sub>2</sub>O for ICP tandem mass spectrometry measurements

Shaun T. Lancaster<sup>a\*</sup>, Thomas Prohaska<sup>ab</sup> and Johanna Irrgeher<sup>ab</sup>

<sup>a</sup>Department of General, Analytical and Physical Chemistry, Chair of General and Analytical Chemistry, Montanuniversität Leoben, Leoben, Austria.

<sup>b</sup>Department of Physics and Astronomy, University of Calgary, Calgary, Canada.



## Mass-Shift with N<sub>2</sub>O and O<sub>2</sub>

Major Product Ions of <sup>128</sup>Te<sup>+</sup> with N<sub>2</sub>O Reaction Gas

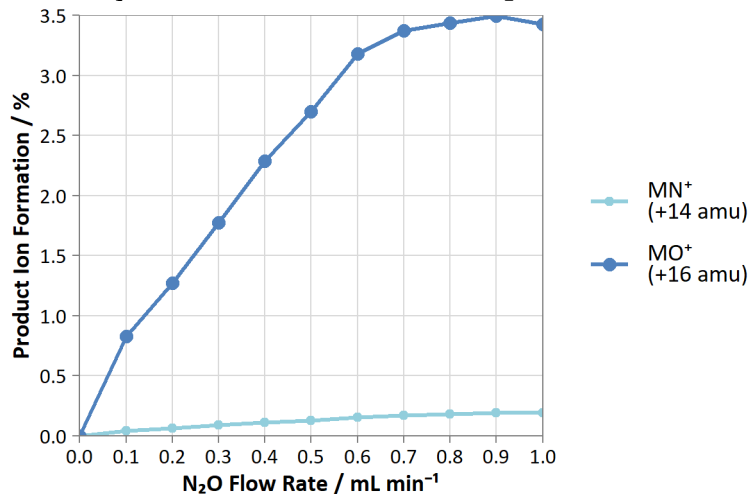

Major Product Ions of <sup>128</sup>Te<sup>+</sup> with O<sub>2</sub> Reaction Gas

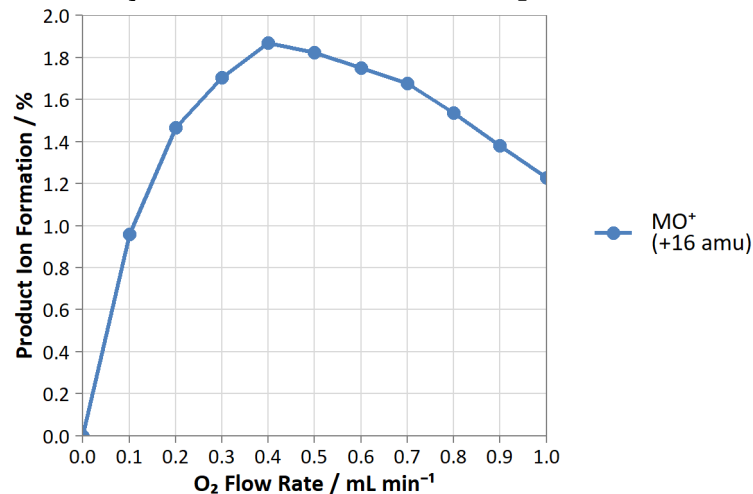

## On-Mass with N<sub>2</sub>O and O<sub>2</sub>

On-Mass Profile of <sup>128</sup>Te<sup>+</sup> with N<sub>2</sub>O and O<sub>2</sub>

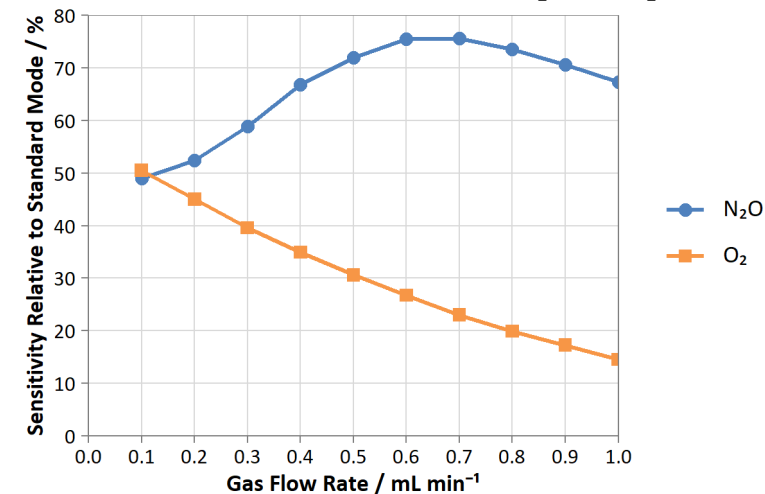

## On-Mass Removal (as Interference) with N<sub>2</sub>O

Variation of <sup>128</sup>Te<sup>16</sup>O<sup>+</sup> Interference with N<sub>2</sub>O Flow Rate  
(On-Mass: Q1 = 144, Q3 = 144)

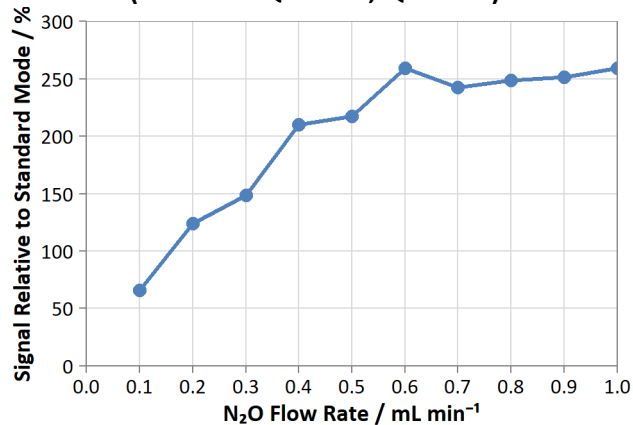

Variation of <sup>128</sup>Te<sup>2+</sup> Interference with N<sub>2</sub>O Flow Rate  
(On-Mass: Q1 = 64, Q3 = 64)

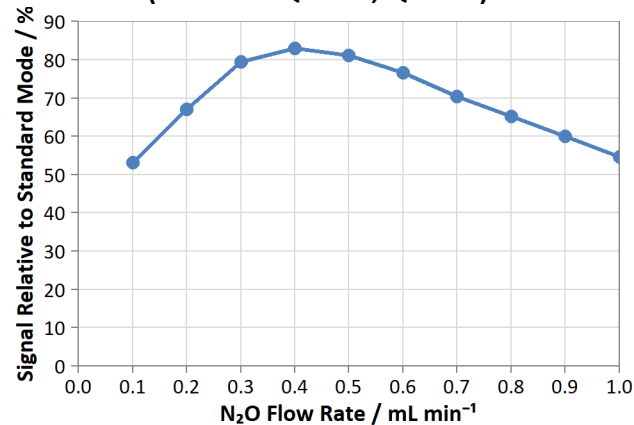

## Asymmetric Charge Transfer (with N<sub>2</sub>O)

[NO CHARGE TRANSFER REACTION OBSERVED]

# Iodine

Supplementary Information B to: Characterisation of gas cell reactions for 70+ elements using N<sub>2</sub>O for ICP tandem mass spectrometry measurements

Shaun T. Lancaster<sup>a\*</sup>, Thomas Prohaska<sup>ab</sup> and Johanna Irrgeher<sup>ab</sup>

<sup>a</sup>Department of General, Analytical and Physical Chemistry, Chair of General and Analytical Chemistry, Montanuniversität Leoben, Leoben, Austria.

<sup>b</sup>Department of Physics and Astronomy, University of Calgary, Calgary, Canada.



## Mass-Shift with N<sub>2</sub>O and O<sub>2</sub>

Major Product Ions of <sup>127</sup>I<sup>+</sup> with N<sub>2</sub>O Reaction Gas

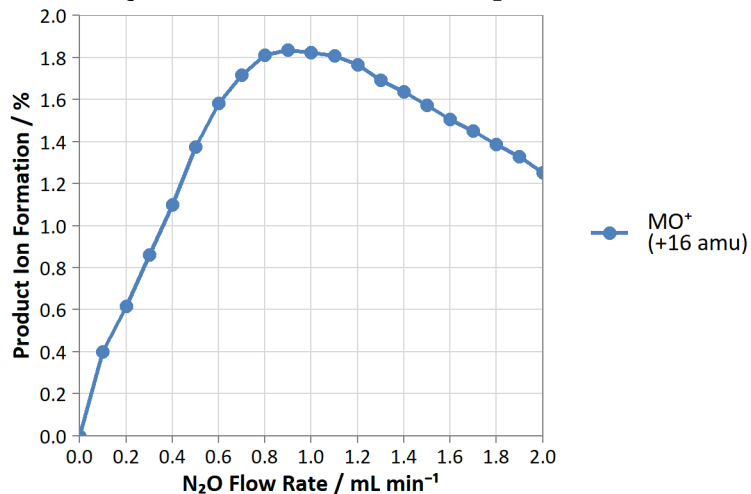

Major Product Ions of <sup>127</sup>I<sup>+</sup> with O<sub>2</sub> Reaction Gas

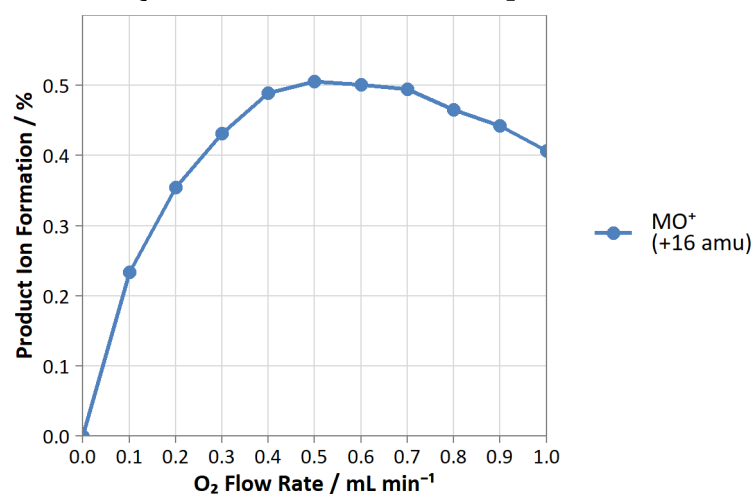

## On-Mass with N<sub>2</sub>O and O<sub>2</sub>

On-Mass Profile of <sup>127</sup>I<sup>+</sup> with N<sub>2</sub>O and O<sub>2</sub>

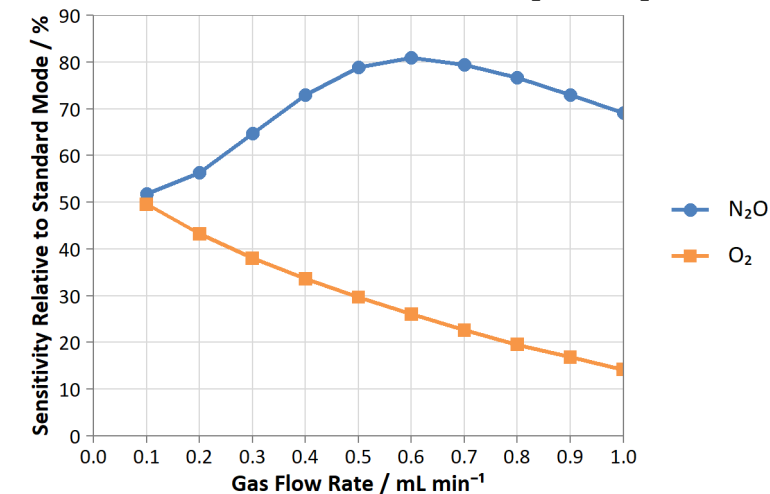

## On-Mass Removal (as Interference) with N<sub>2</sub>O

Variation of <sup>127</sup>I<sup>16</sup>O<sup>+</sup> Interference with N<sub>2</sub>O Flow Rate  
(On-Mass: Q1 = 143, Q3 = 143)

[INSUFFICIENT OXIDE FORMATION OBSERVED]

Variation of <sup>127</sup>I<sup>2+</sup> Interference with N<sub>2</sub>O Flow Rate  
(On-Mass: Q1 = 63.5, Q3 = 63.5)

[INSUFFICIENT DOUBLY-CHARGED ION FORMATION OBSERVED]

## Asymmetric Charge Transfer (with N<sub>2</sub>O)

[NO CHARGE TRANSFER REACTION OBSERVED]



## Mass-Shift with N<sub>2</sub>O and O<sub>2</sub>

Major Product Ions of <sup>133</sup>Cs<sup>+</sup> with N<sub>2</sub>O Reaction Gas

[NO ATOM TRANSFER  
REACTION OBSERVED]

Major Product Ions of <sup>133</sup>Cs<sup>+</sup> with O<sub>2</sub> Reaction Gas

[NO ATOM TRANSFER  
REACTION OBSERVED]

## On-Mass with N<sub>2</sub>O and O<sub>2</sub>

On-Mass Profile of <sup>133</sup>Cs<sup>+</sup> with N<sub>2</sub>O and O<sub>2</sub>

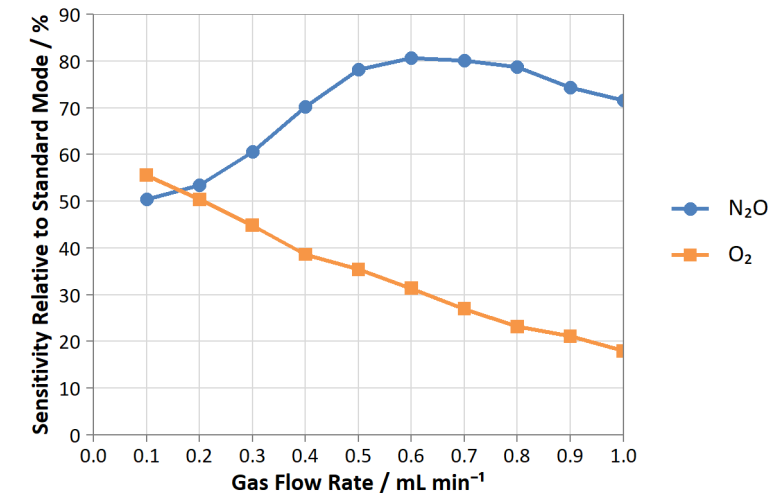

## On-Mass Removal (as Interference) with N<sub>2</sub>O

Variation of <sup>133</sup>Cs<sup>16</sup>O<sup>+</sup> Interference with  
N<sub>2</sub>O Flow Rate  
(On-Mass: Q1 = 149, Q3 = 149)

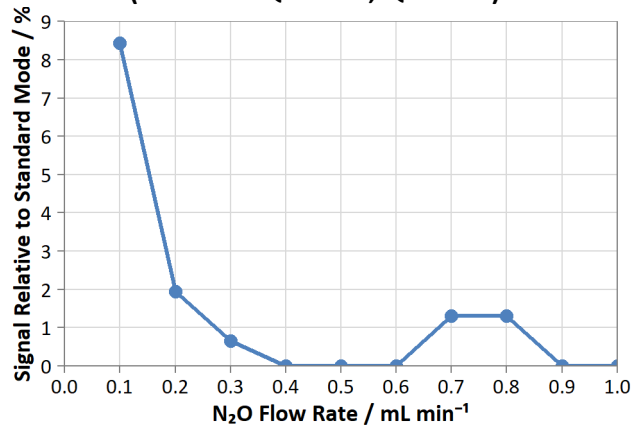

Variation of <sup>133</sup>Cs<sup>2+</sup> Interference with  
N<sub>2</sub>O Flow Rate  
(On-Mass: Q1 = 66.5, Q3 = 66.5)

[INSUFFICIENT DOUBLY-CHARGED  
ION FORMATION OBSERVED]

## Asymmetric Charge Transfer (with N<sub>2</sub>O)

[NO CHARGE TRANSFER  
REACTION OBSERVED]

# Barium

Supplementary Information B to: Characterisation of gas cell reactions for 70+ elements using N<sub>2</sub>O for ICP tandem mass spectrometry measurements

Shaun T. Lancaster<sup>a\*</sup>, Thomas Prohaska<sup>ab</sup> and Johanna Irrgeher<sup>ab</sup>

<sup>a</sup>Department of General, Analytical and Physical Chemistry, Chair of General and Analytical Chemistry, Montanuniversität Leoben, Leoben, Austria.

<sup>b</sup>Department of Physics and Astronomy, University of Calgary, Calgary, Canada.



## Mass-Shift with N<sub>2</sub>O and O<sub>2</sub>

Major Product Ions of <sup>138</sup>Ba<sup>+</sup> with N<sub>2</sub>O Reaction Gas

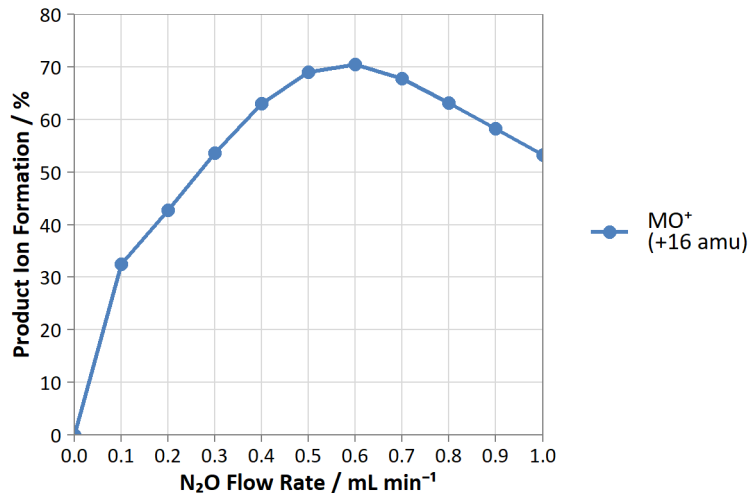

Major Product Ions of <sup>138</sup>Ba<sup>+</sup> with O<sub>2</sub> Reaction Gas

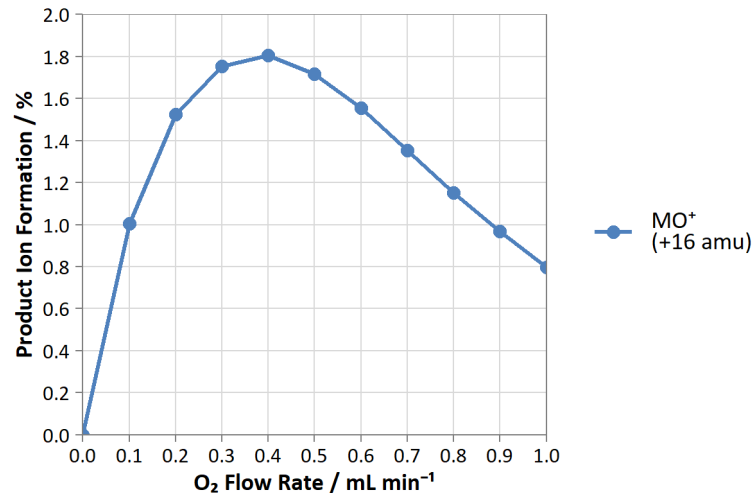

## On-Mass with N<sub>2</sub>O and O<sub>2</sub>

On-Mass Profile of <sup>138</sup>Ba<sup>+</sup> with N<sub>2</sub>O and O<sub>2</sub>

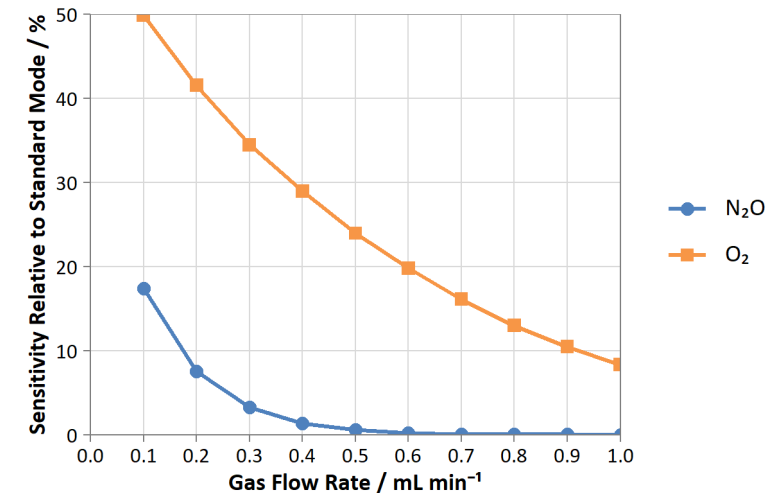

## On-Mass Removal (as Interference) with N<sub>2</sub>O

Variation of <sup>138</sup>Ba<sup>16</sup>O<sup>+</sup> Interference with N<sub>2</sub>O Flow Rate (On-Mass: Q1 = 154, Q3 = 154)

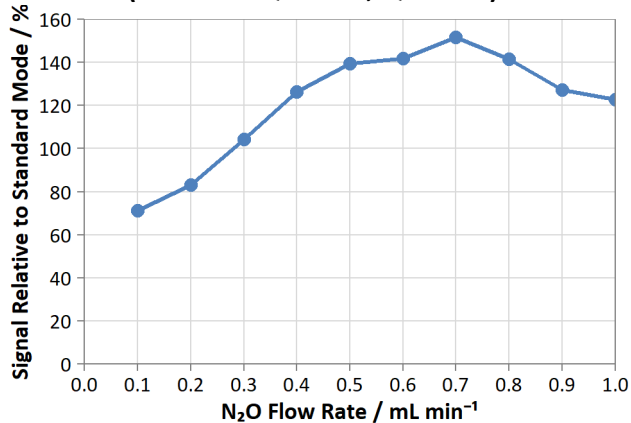

Variation of <sup>138</sup>Ba<sup>2+</sup> Interference with N<sub>2</sub>O Flow Rate (On-Mass: Q1 = 69, Q3 = 69)

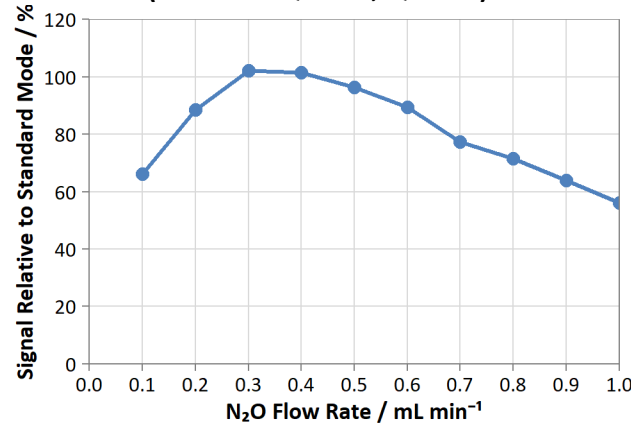

## Asymmetric Charge Transfer (with N<sub>2</sub>O)

[NO CHARGE TRANSFER REACTION OBSERVED]



# Lanthanum

Supplementary Information B to: Characterisation of gas cell reactions for 70+ elements using N<sub>2</sub>O for ICP tandem mass spectrometry measurements

Shaun T. Lancaster<sup>a\*</sup>, Thomas Prohaska<sup>ab</sup> and Johanna Irrgeher<sup>ab</sup>

<sup>a</sup>Department of General, Analytical and Physical Chemistry, Chair of General and Analytical Chemistry, Montanuniversität Leoben, Leoben, Austria.

<sup>b</sup>Department of Physics and Astronomy, University of Calgary, Calgary, Canada.



## Mass-Shift with N<sub>2</sub>O and O<sub>2</sub>

Major Product Ions of <sup>139</sup>La<sup>+</sup> with N<sub>2</sub>O Reaction Gas

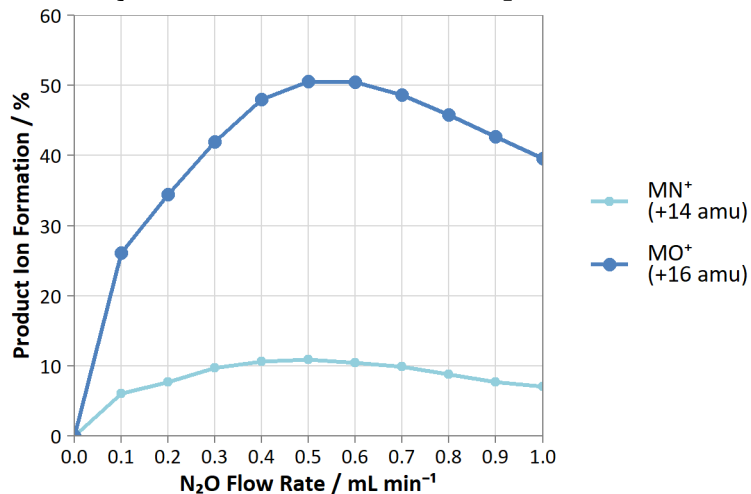

Major Product Ions of <sup>139</sup>La<sup>+</sup> with O<sub>2</sub> Reaction Gas

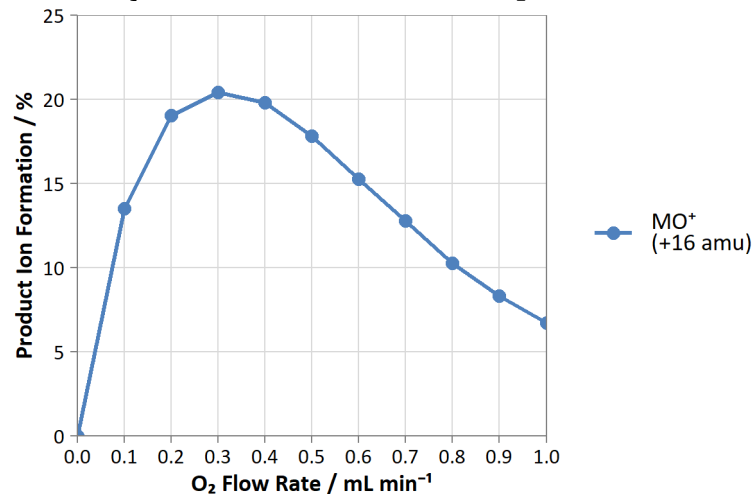

## On-Mass with N<sub>2</sub>O and O<sub>2</sub>

On-Mass Profile of <sup>139</sup>La<sup>+</sup> with N<sub>2</sub>O and O<sub>2</sub>

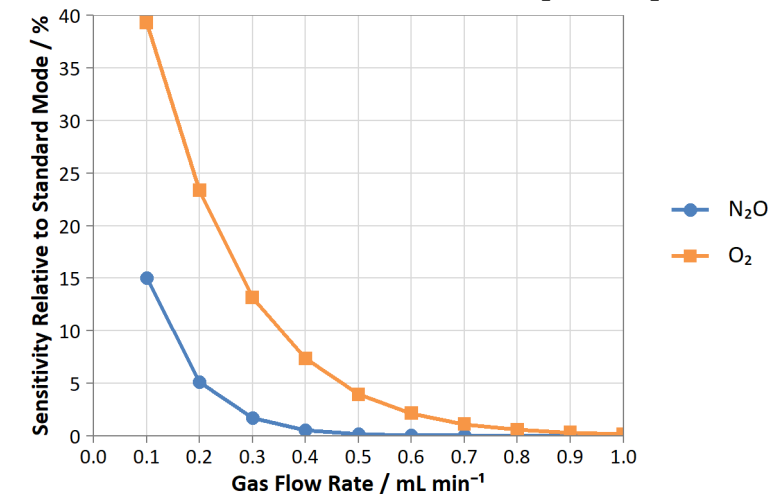

## On-Mass Removal (as Interference) with N<sub>2</sub>O

Variation of <sup>139</sup>La<sup>16</sup>O<sup>+</sup> Interference with N<sub>2</sub>O Flow Rate (On-Mass: Q1 = 155, Q3 = 155)

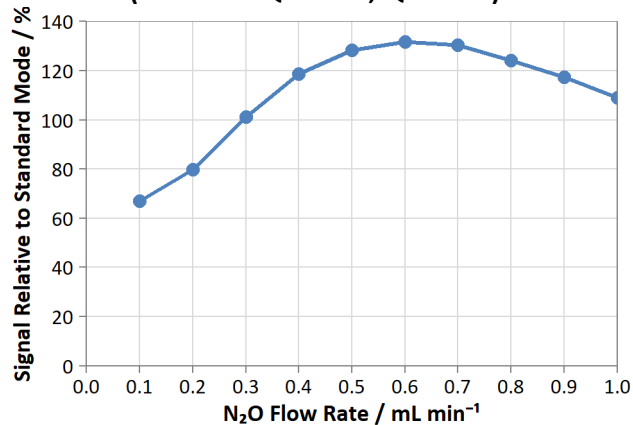

Variation of <sup>139</sup>La<sup>2+</sup> Interference with N<sub>2</sub>O Flow Rate (On-Mass: Q1 = 69.5, Q3 = 69.5)

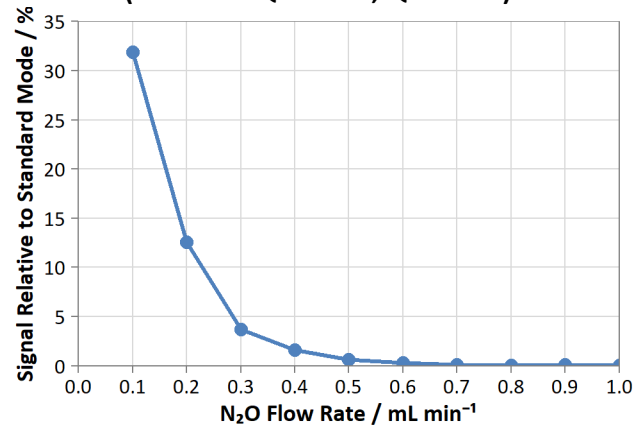

## Asymmetric Charge Transfer (with N<sub>2</sub>O)

[NO CHARGE TRANSFER REACTION OBSERVED]

# Cerium

Supplementary Information B to: Characterisation of gas cell reactions for 70+ elements using N<sub>2</sub>O for ICP tandem mass spectrometry measurements

Shaun T. Lancaster<sup>a\*</sup>, Thomas Prohaska<sup>ab</sup> and Johanna Irrgeher<sup>ab</sup>

<sup>a</sup>Department of General, Analytical and Physical Chemistry, Chair of General and Analytical Chemistry, Montanuniversität Leoben, Leoben, Austria.

<sup>b</sup>Department of Physics and Astronomy, University of Calgary, Calgary, Canada.



## Mass-Shift with N<sub>2</sub>O and O<sub>2</sub>

Major Product Ions of <sup>140</sup>Ce<sup>+</sup> with N<sub>2</sub>O Reaction Gas

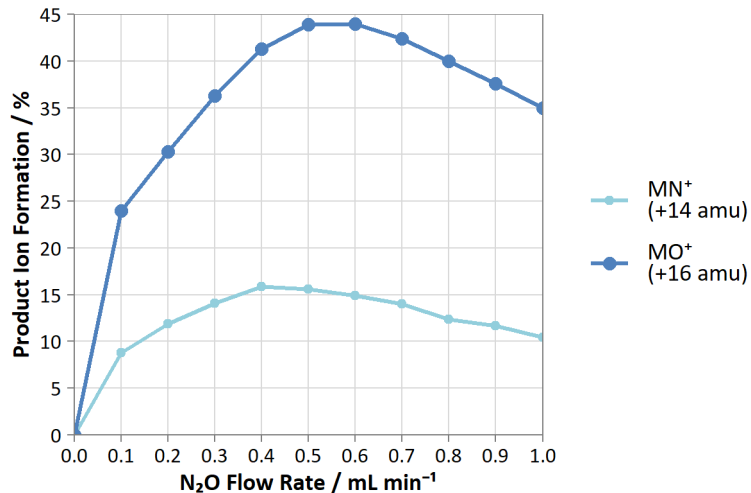

Major Product Ions of <sup>140</sup>Ce<sup>+</sup> with O<sub>2</sub> Reaction Gas

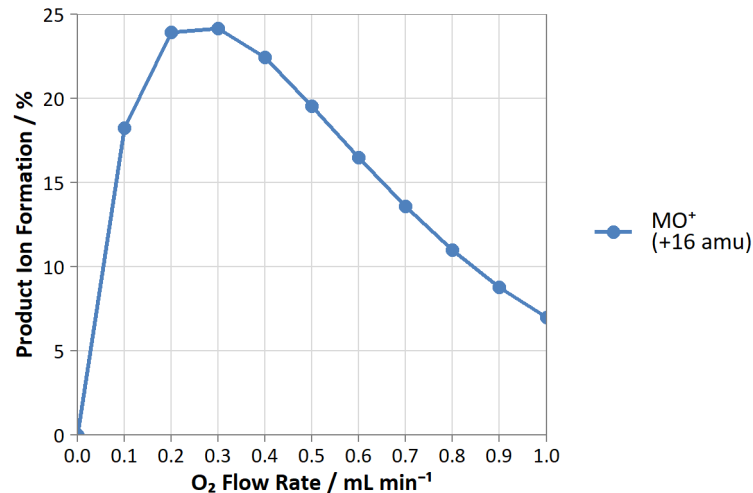

## On-Mass with N<sub>2</sub>O and O<sub>2</sub>

On-Mass Profile of <sup>140</sup>Ce<sup>+</sup> with N<sub>2</sub>O and O<sub>2</sub>

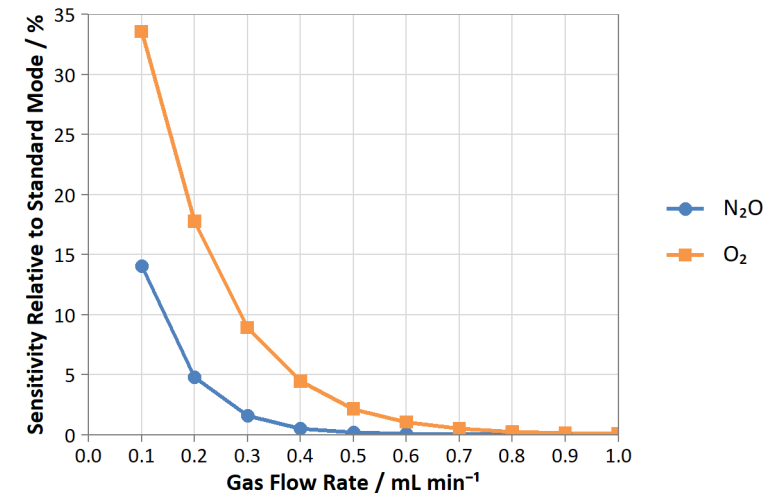

## On-Mass Removal (as Interference) with N<sub>2</sub>O

Variation of <sup>140</sup>Ce<sup>16</sup>O<sup>+</sup> Interference with N<sub>2</sub>O Flow Rate (On-Mass: Q1 = 156, Q3 = 156)

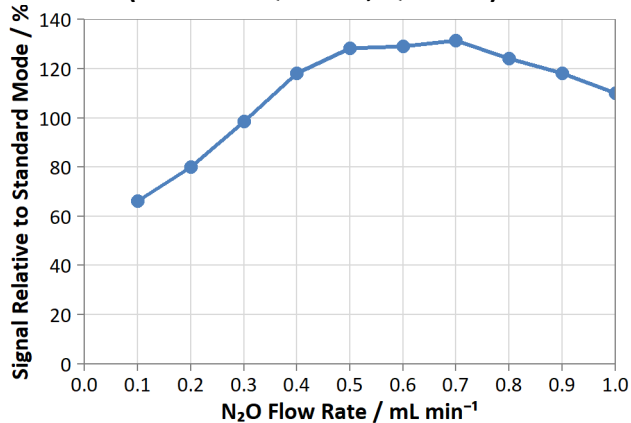

Variation of <sup>140</sup>Ce<sup>2+</sup> Interference with N<sub>2</sub>O Flow Rate (On-Mass: Q1 = 70, Q3 = 70)

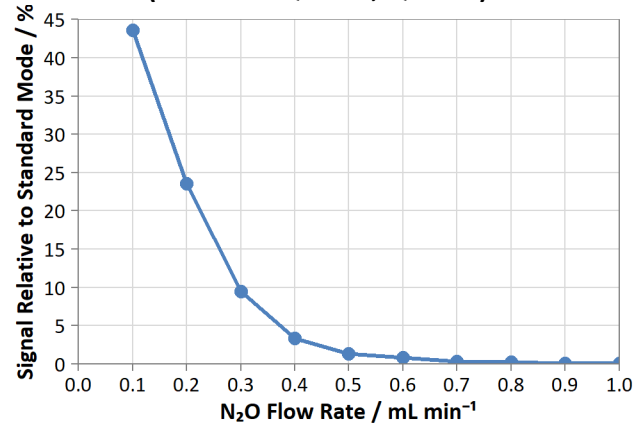

## Asymmetric Charge Transfer (with N<sub>2</sub>O)

[NO CHARGE TRANSFER REACTION OBSERVED]





# Praseodymium

Supplementary Information B to: Characterisation of gas cell reactions for 70+ elements using N<sub>2</sub>O for ICP tandem mass spectrometry measurements

Shaun T. Lancaster<sup>a\*</sup>, Thomas Prohaska<sup>ab</sup> and Johanna Irrgeher<sup>ab</sup>

<sup>a</sup>Department of General, Analytical and Physical Chemistry, Chair of General and Analytical Chemistry, Montanuniversität Leoben, Leoben, Austria.

<sup>b</sup>Department of Physics and Astronomy, University of Calgary, Calgary, Canada.



## Mass-Shift with N<sub>2</sub>O and O<sub>2</sub>

Major Product Ions of <sup>141</sup>Pr<sup>+</sup> with N<sub>2</sub>O Reaction Gas

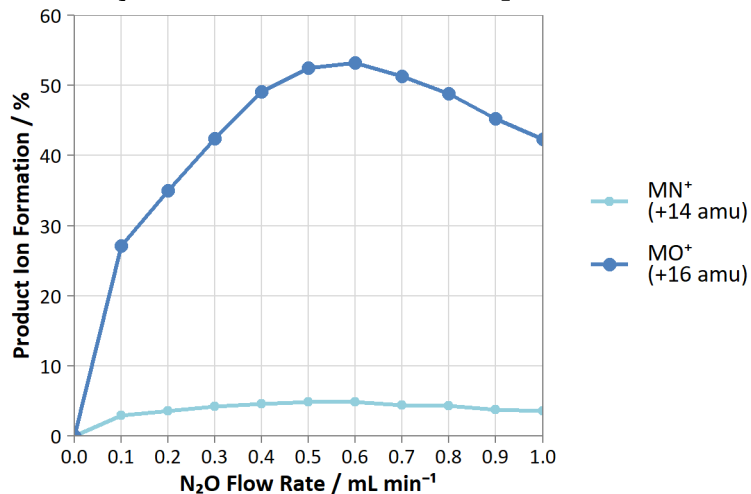

Major Product Ions of <sup>141</sup>Pr<sup>+</sup> with O<sub>2</sub> Reaction Gas

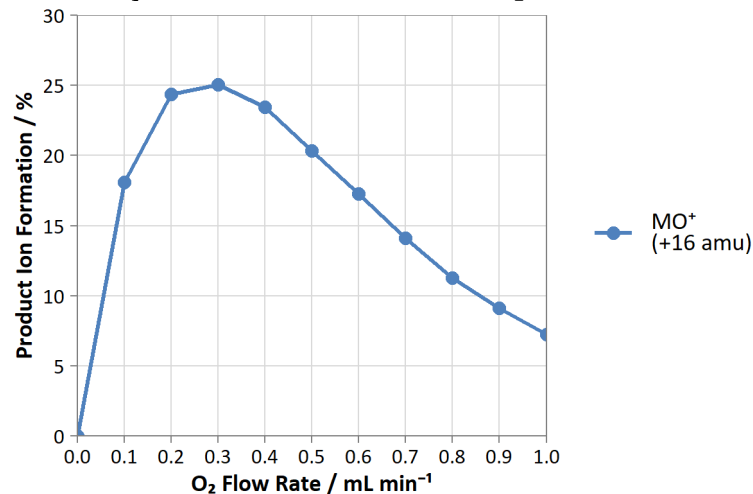

## On-Mass with N<sub>2</sub>O and O<sub>2</sub>

On-Mass Profile of <sup>141</sup>Pr<sup>+</sup> with N<sub>2</sub>O and O<sub>2</sub>

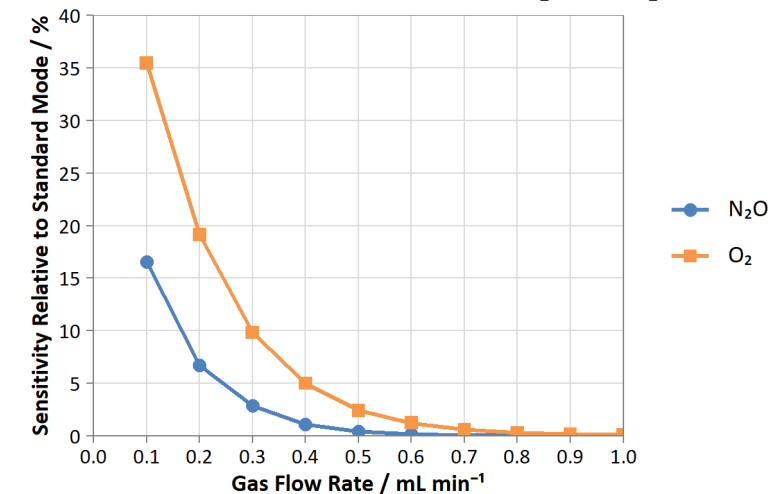

## On-Mass Removal (as Interference) with N<sub>2</sub>O

Variation of <sup>141</sup>Pr<sup>16</sup>O<sup>+</sup> Interference with N<sub>2</sub>O Flow Rate (On-Mass: Q1 = 157, Q3 = 157)

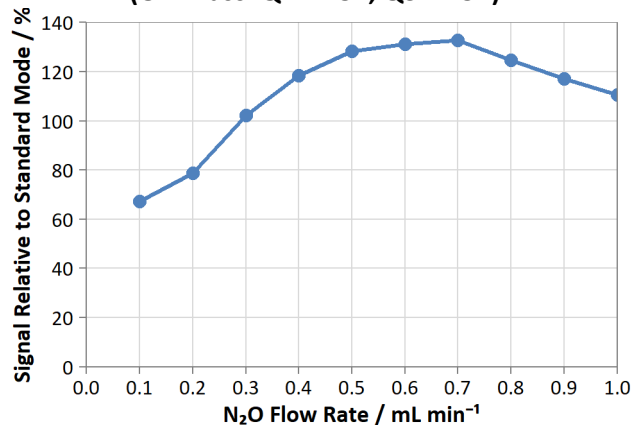

Variation of <sup>141</sup>Pr<sup>2+</sup> Interference with N<sub>2</sub>O Flow Rate (On-Mass: Q1 = 70.5, Q3 = 70.5)

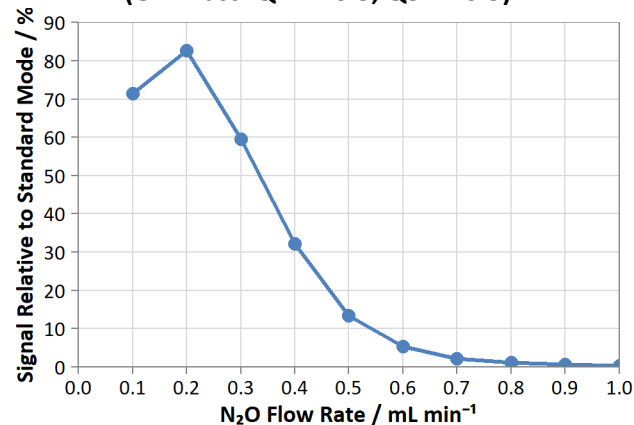

## Asymmetric Charge Transfer (with N<sub>2</sub>O)

[NO CHARGE TRANSFER REACTION OBSERVED]



# Neodymium

Supplementary Information B to: Characterisation of gas cell reactions for 70+ elements using N<sub>2</sub>O for ICP tandem mass spectrometry measurements  
Shaun T. Lancaster<sup>a\*</sup>, Thomas Prohaska<sup>ab</sup> and Johanna Irrgeher<sup>ab</sup>  
<sup>a</sup>Department of General, Analytical and Physical Chemistry, Chair of General and Analytical Chemistry, Montanuniversität Leoben, Leoben, Austria.  
<sup>b</sup>Department of Physics and Astronomy, University of Calgary, Calgary, Canada.



## Mass-Shift with N<sub>2</sub>O and O<sub>2</sub>

Major Product Ions of <sup>143</sup>Nd<sup>+</sup> with N<sub>2</sub>O Reaction Gas

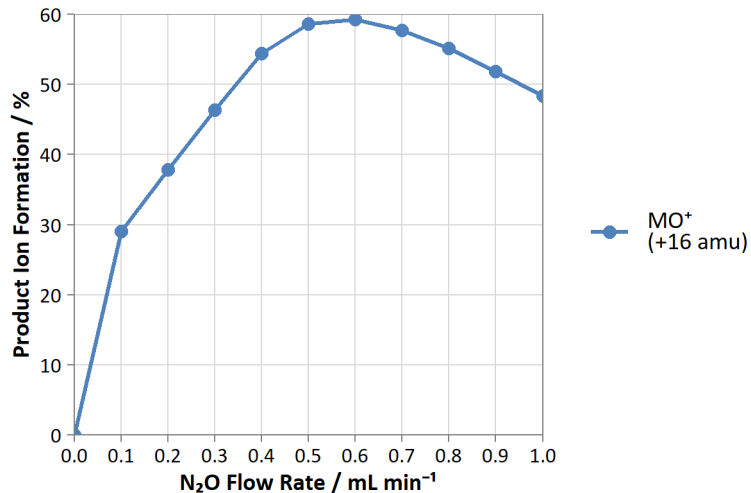

Major Product Ions of <sup>143</sup>Nd<sup>+</sup> with O<sub>2</sub> Reaction Gas

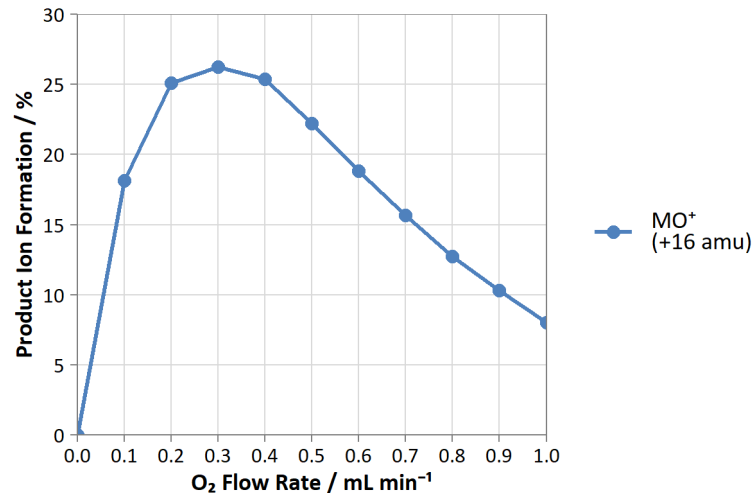

## On-Mass with N<sub>2</sub>O and O<sub>2</sub>

On-Mass Profile of <sup>143</sup>Nd<sup>+</sup> with N<sub>2</sub>O and O<sub>2</sub>

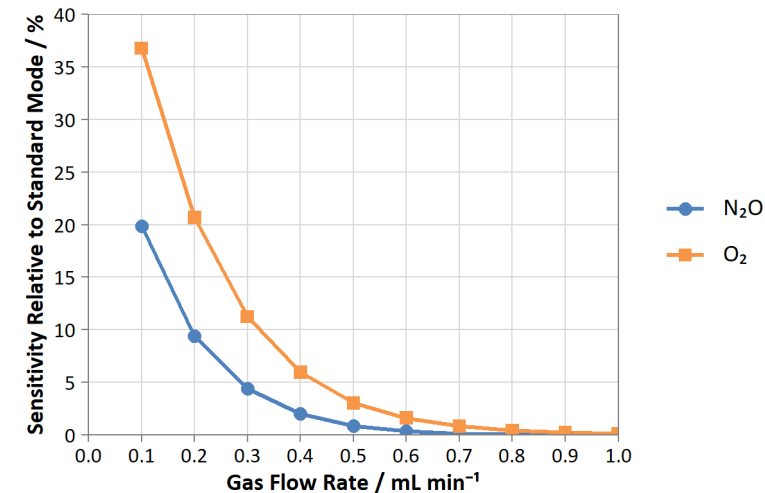

## On-Mass Removal (as Interference) with N<sub>2</sub>O

Variation of <sup>143</sup>Nd<sup>16</sup>O<sup>+</sup> Interference with N<sub>2</sub>O Flow Rate  
(On-Mass: Q1 = 159, Q3 = 159)

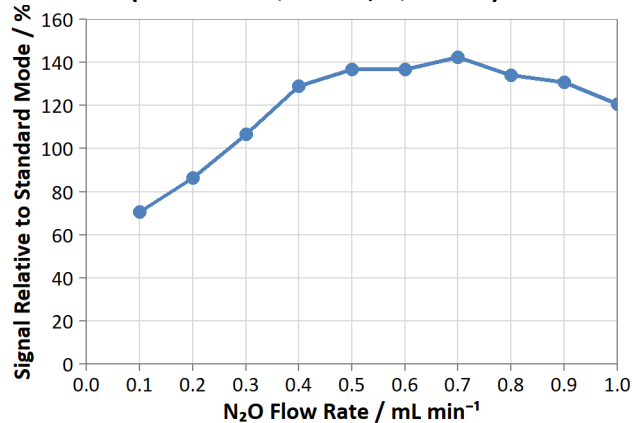

Variation of <sup>143</sup>Nd<sup>2+</sup> Interference with N<sub>2</sub>O Flow Rate  
(On-Mass: Q1 = 71.5, Q3 = 71.5)

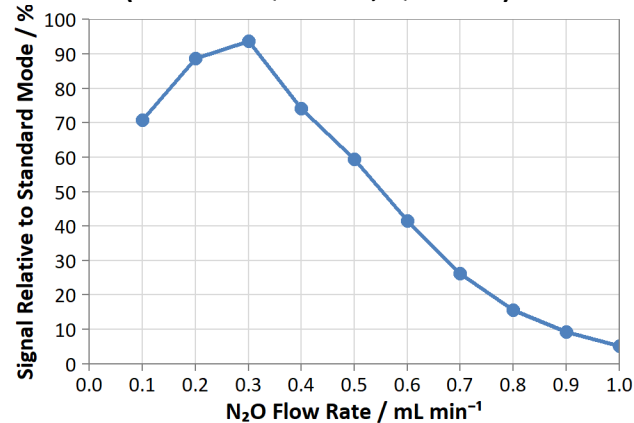

## Asymmetric Charge Transfer (with N<sub>2</sub>O)

[NO CHARGE TRANSFER REACTION OBSERVED]

# Samarium

Supplementary Information B to: Characterisation of gas cell reactions for 70+ elements using N<sub>2</sub>O for ICP tandem mass spectrometry measurements

Shaun T. Lancaster<sup>a\*</sup>, Thomas Prohaska<sup>ab</sup> and Johanna Irrgeher<sup>ab</sup>

<sup>a</sup>Department of General, Analytical and Physical Chemistry, Chair of General and Analytical Chemistry, Montanuniversität Leoben, Leoben, Austria.

<sup>b</sup>Department of Physics and Astronomy, University of Calgary, Calgary, Canada.



## Mass-Shift with N<sub>2</sub>O and O<sub>2</sub>

Major Product Ions of <sup>147</sup>Sm<sup>+</sup> with N<sub>2</sub>O Reaction Gas

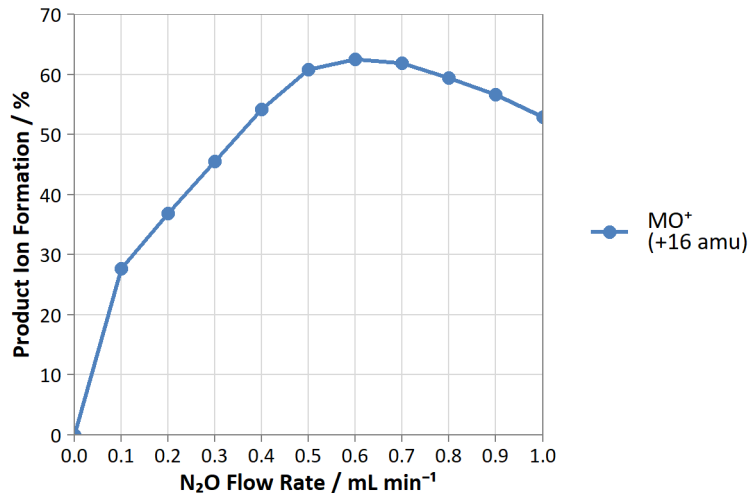

Major Product Ions of <sup>147</sup>Sm<sup>+</sup> with O<sub>2</sub> Reaction Gas

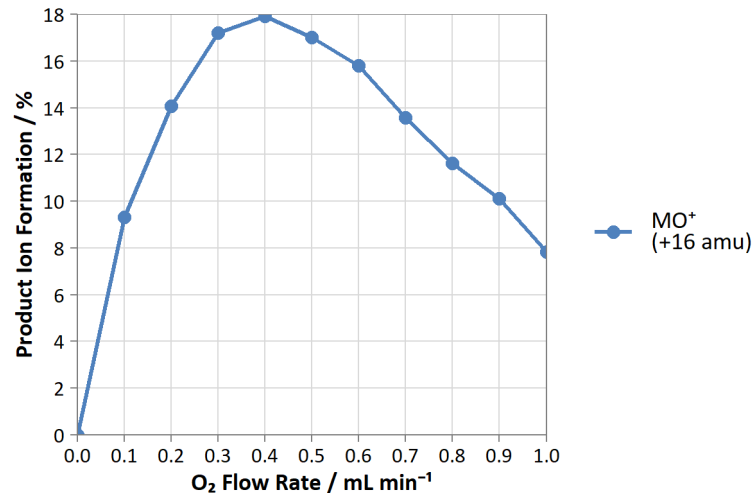

## On-Mass with N<sub>2</sub>O and O<sub>2</sub>

On-Mass Profile of <sup>147</sup>Sm<sup>+</sup> with N<sub>2</sub>O and O<sub>2</sub>

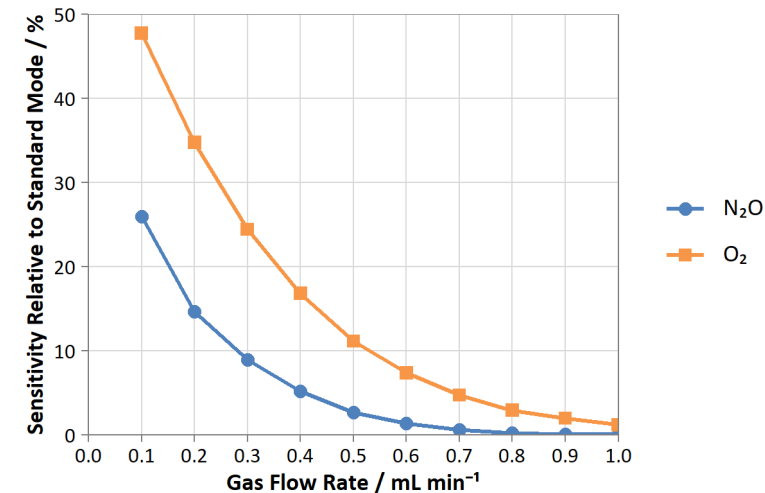

## On-Mass Removal (as Interference) with N<sub>2</sub>O

Variation of <sup>147</sup>Sm<sup>16</sup>O<sup>+</sup> Interference with N<sub>2</sub>O Flow Rate (On-Mass: Q1 = 163, Q3 = 163)

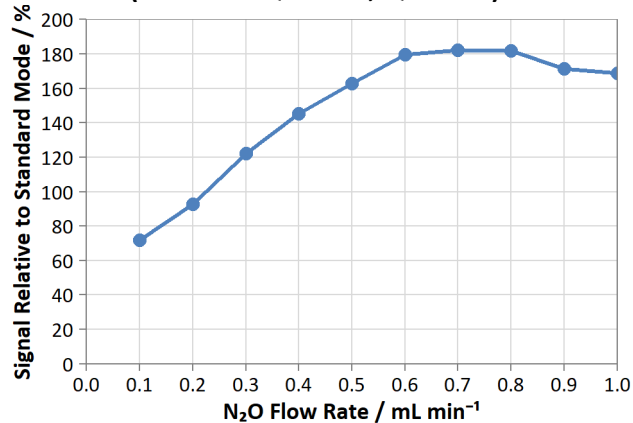

Variation of <sup>147</sup>Sm<sup>2+</sup> Interference with N<sub>2</sub>O Flow Rate (On-Mass: Q1 = 73.5, Q3 = 73.5)

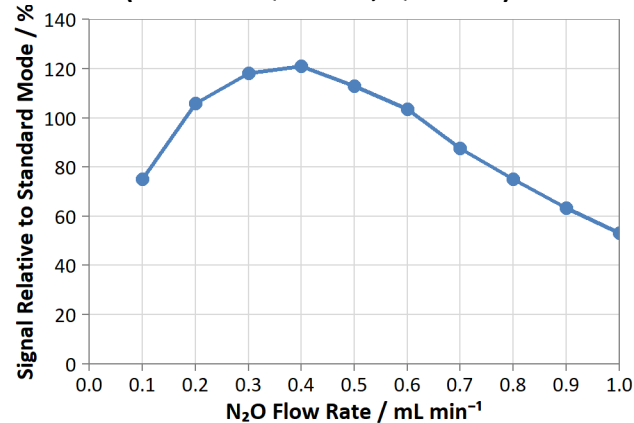

## Asymmetric Charge Transfer (with N<sub>2</sub>O)

[NO CHARGE TRANSFER REACTION OBSERVED]



# Europium

Supplementary Information B to: Characterisation of gas cell reactions for 70+ elements using N<sub>2</sub>O for ICP tandem mass spectrometry measurements

Shaun T. Lancaster<sup>a\*</sup>, Thomas Prohaska<sup>ab</sup> and Johanna Irrgeher<sup>ab</sup>

<sup>a</sup>Department of General, Analytical and Physical Chemistry, Chair of General and Analytical Chemistry, Montanuniversität Leoben, Leoben, Austria.

<sup>b</sup>Department of Physics and Astronomy, University of Calgary, Calgary, Canada.



## Mass-Shift with N<sub>2</sub>O and O<sub>2</sub>

Major Product Ions of <sup>153</sup>Eu<sup>+</sup> with N<sub>2</sub>O Reaction Gas

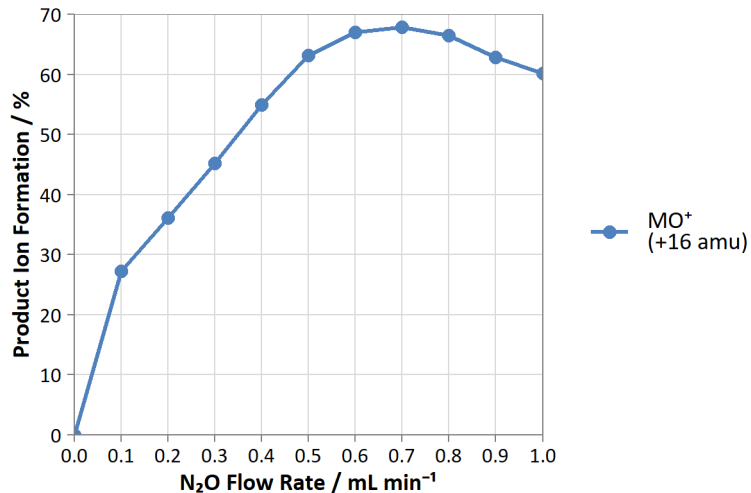

Major Product Ions of <sup>153</sup>Eu<sup>+</sup> with O<sub>2</sub> Reaction Gas

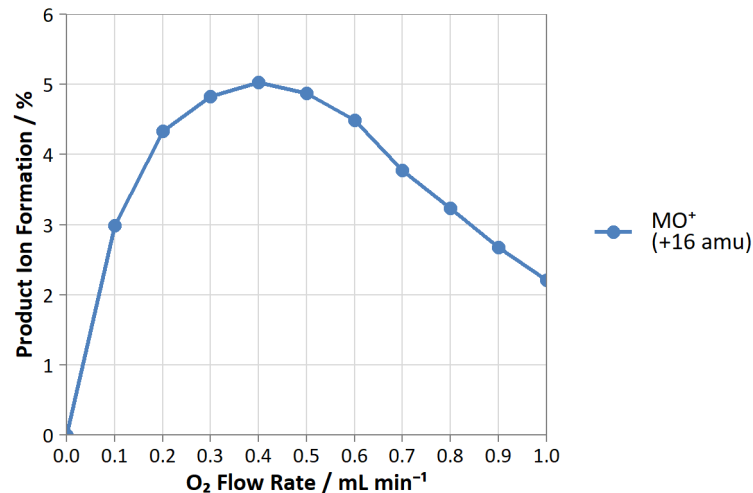

## On-Mass with N<sub>2</sub>O and O<sub>2</sub>

On-Mass Profile of <sup>153</sup>Eu<sup>+</sup> with N<sub>2</sub>O and O<sub>2</sub>

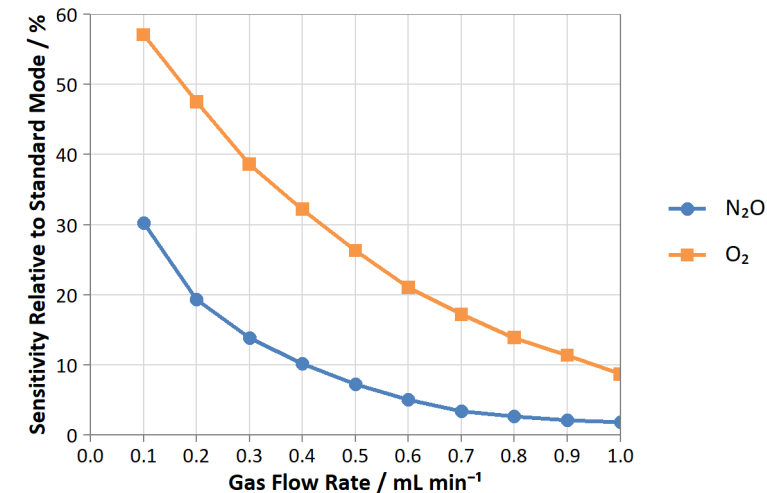

## On-Mass Removal (as Interference) with N<sub>2</sub>O

Variation of <sup>153</sup>Eu<sup>16</sup>O<sup>+</sup> Interference with N<sub>2</sub>O Flow Rate  
(On-Mass: Q1 = 169, Q3 = 169)

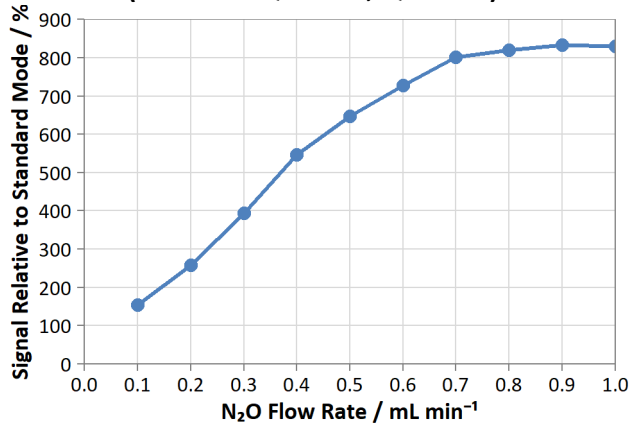

Variation of <sup>153</sup>Eu<sup>2+</sup> Interference with N<sub>2</sub>O Flow Rate  
(On-Mass: Q1 = 76.5, Q3 = 76.5)

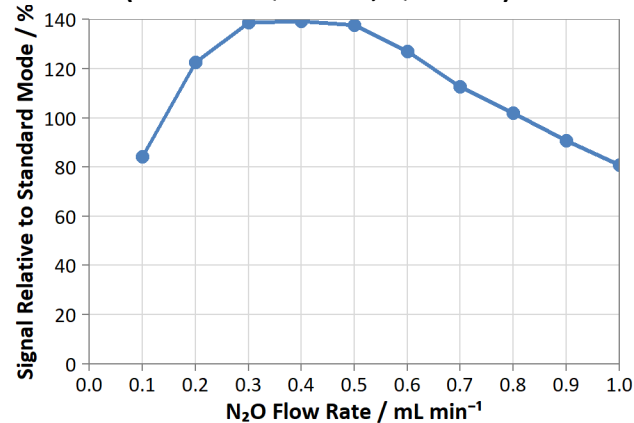

## Asymmetric Charge Transfer (with N<sub>2</sub>O)

[NO CHARGE TRANSFER REACTION OBSERVED]



# Gadolinium

Supplementary Information B to: Characterisation of gas cell reactions for 70+ elements using N<sub>2</sub>O for ICP tandem mass spectrometry measurements

Shaun T. Lancaster<sup>a\*</sup>, Thomas Prohaska<sup>ab</sup> and Johanna Irrgeher<sup>ab</sup>

<sup>a</sup>Department of General, Analytical and Physical Chemistry, Chair of General and Analytical Chemistry, Montanuniversität Leoben, Leoben, Austria.

<sup>b</sup>Department of Physics and Astronomy, University of Calgary, Calgary, Canada.



## Mass-Shift with N<sub>2</sub>O and O<sub>2</sub>

Major Product Ions of <sup>155</sup>Gd<sup>+</sup> with N<sub>2</sub>O Reaction Gas

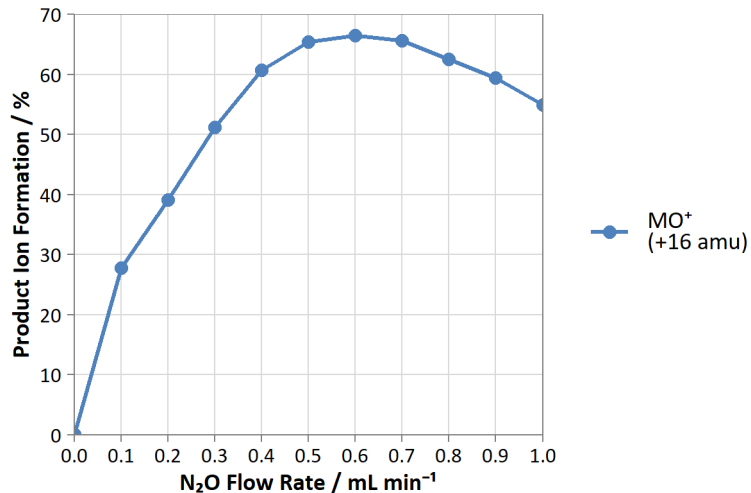

Major Product Ions of <sup>155</sup>Gd<sup>+</sup> with O<sub>2</sub> Reaction Gas

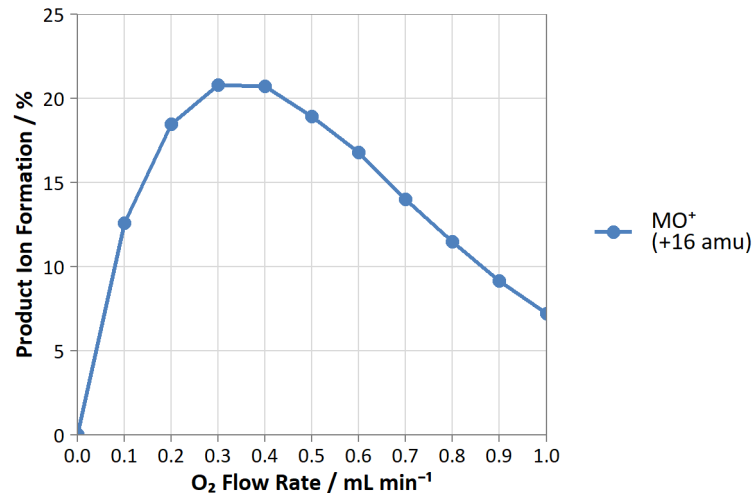

## On-Mass with N<sub>2</sub>O and O<sub>2</sub>

On-Mass Profile of <sup>155</sup>Gd<sup>+</sup> with N<sub>2</sub>O and O<sub>2</sub>

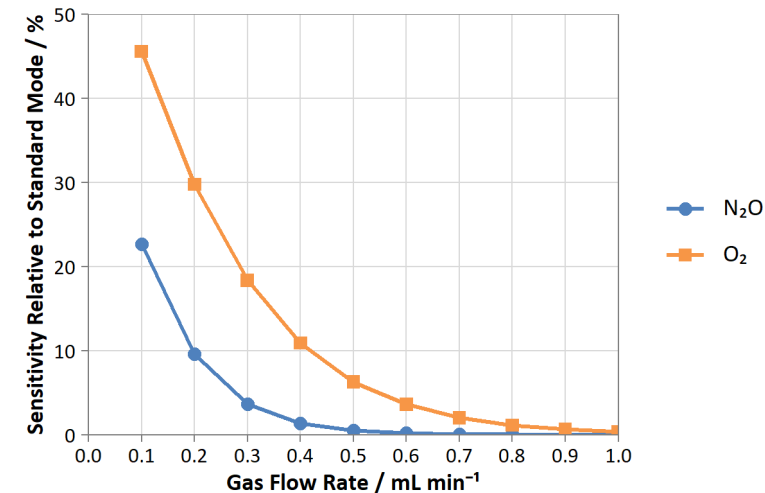

## On-Mass Removal (as Interference) with N<sub>2</sub>O

Variation of <sup>155</sup>Gd<sup>16</sup>O<sup>+</sup> Interference with N<sub>2</sub>O Flow Rate (On-Mass: Q1 = 171, Q3 = 171)

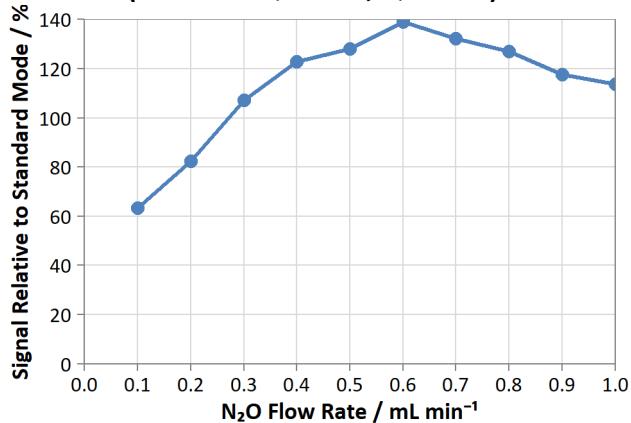

Variation of <sup>155</sup>Gd<sup>2+</sup> Interference with N<sub>2</sub>O Flow Rate (On-Mass: Q1 = 77.5, Q3 = 77.5)

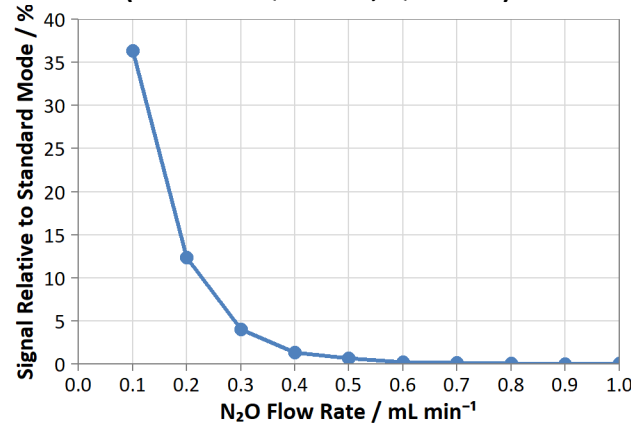

## Asymmetric Charge Transfer (with N<sub>2</sub>O)

[NO CHARGE TRANSFER REACTION OBSERVED]

# Terbium

Supplementary Information B to: Characterisation of gas cell reactions for 70+ elements using N<sub>2</sub>O for ICP tandem mass spectrometry measurements

Shaun T. Lancaster<sup>a\*</sup>, Thomas Prohaska<sup>ab</sup> and Johanna Irrgeher<sup>ab</sup>

<sup>a</sup>Department of General, Analytical and Physical Chemistry, Chair of General and Analytical Chemistry, Montanuniversität Leoben, Leoben, Austria.

<sup>b</sup>Department of Physics and Astronomy, University of Calgary, Calgary, Canada.



## Mass-Shift with N<sub>2</sub>O and O<sub>2</sub>

Major Product Ions of <sup>159</sup>Tb<sup>+</sup> with N<sub>2</sub>O Reaction Gas

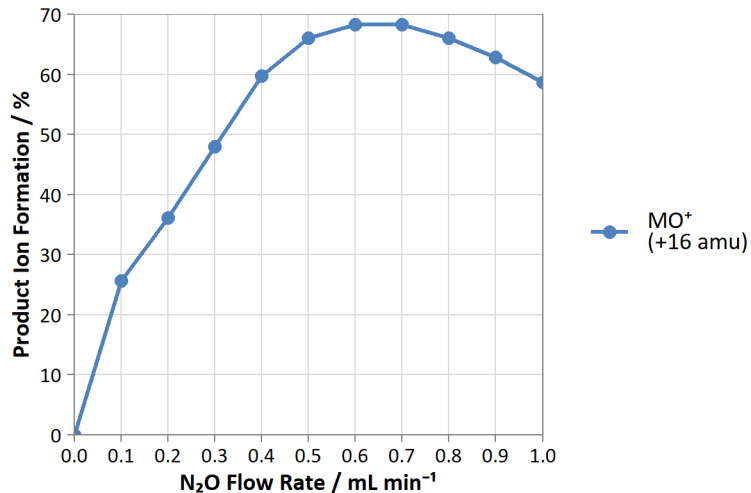

Major Product Ions of <sup>159</sup>Tb<sup>+</sup> with O<sub>2</sub> Reaction Gas

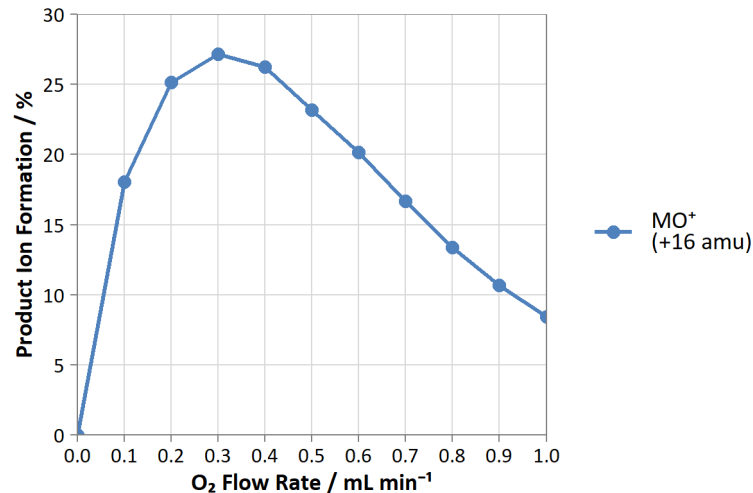

## On-Mass with N<sub>2</sub>O and O<sub>2</sub>

On-Mass Profile of <sup>159</sup>Tb<sup>+</sup> with N<sub>2</sub>O and O<sub>2</sub>

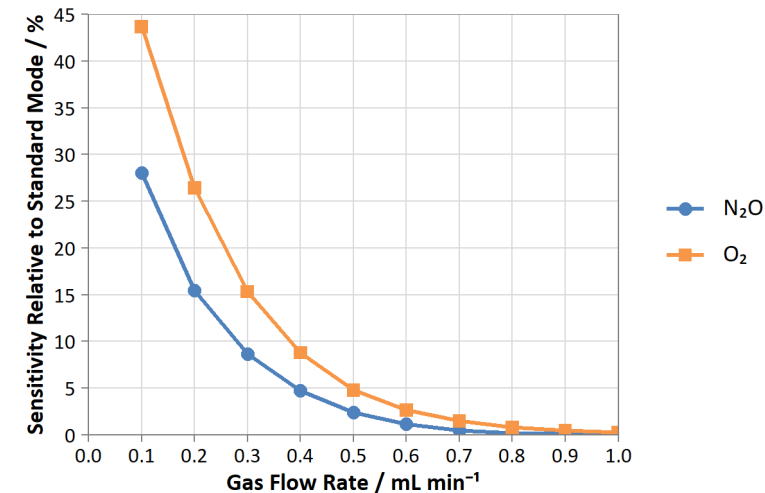

## On-Mass Removal (as Interference) with N<sub>2</sub>O

Variation of <sup>159</sup>Tb<sup>16</sup>O<sup>+</sup> Interference with N<sub>2</sub>O Flow Rate  
(On-Mass: Q1 = 175, Q3 = 175)

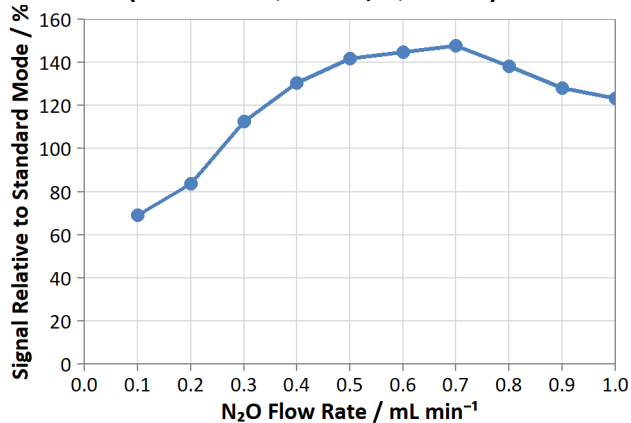

Variation of <sup>159</sup>Tb<sup>2+</sup> Interference with N<sub>2</sub>O Flow Rate  
(On-Mass: Q1 = 79.5, Q3 = 79.5)

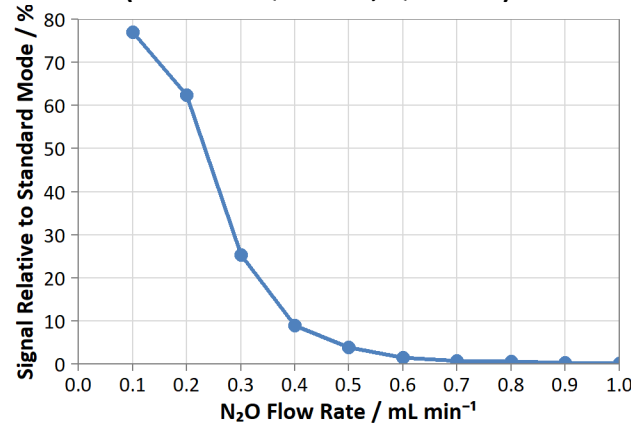

## Asymmetric Charge Transfer (with N<sub>2</sub>O)

[NO CHARGE TRANSFER REACTION OBSERVED]



# Dysprosium

Supplementary Information B to: Characterisation of gas cell reactions for 70+ elements using N<sub>2</sub>O for ICP tandem mass spectrometry measurements

Shaun T. Lancaster<sup>a\*</sup>, Thomas Prohaska<sup>ab</sup> and Johanna Irrgeher<sup>ab</sup>

<sup>a</sup>Department of General, Analytical and Physical Chemistry, Chair of General and Analytical Chemistry, Montanuniversität Leoben, Leoben, Austria.

<sup>b</sup>Department of Physics and Astronomy, University of Calgary, Calgary, Canada.



## Mass-Shift with N<sub>2</sub>O and O<sub>2</sub>

Major Product Ions of <sup>163</sup>Dy<sup>+</sup> with N<sub>2</sub>O Reaction Gas

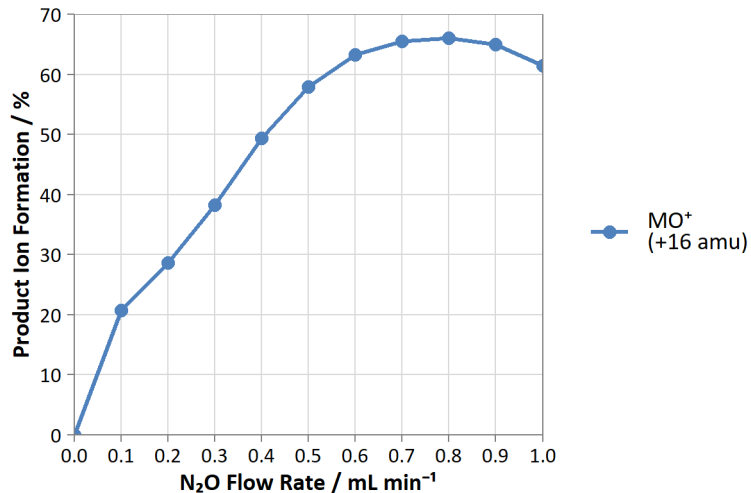

Major Product Ions of <sup>163</sup>Dy<sup>+</sup> with O<sub>2</sub> Reaction Gas

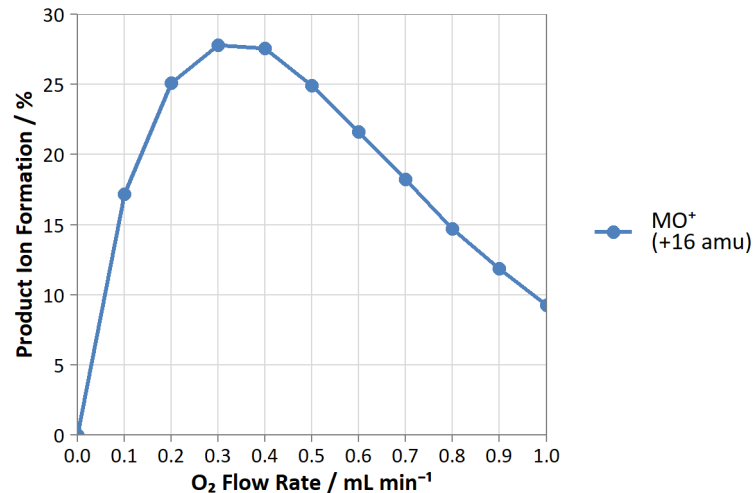

## On-Mass with N<sub>2</sub>O and O<sub>2</sub>

On-Mass Profile of <sup>163</sup>Dy<sup>+</sup> with N<sub>2</sub>O and O<sub>2</sub>

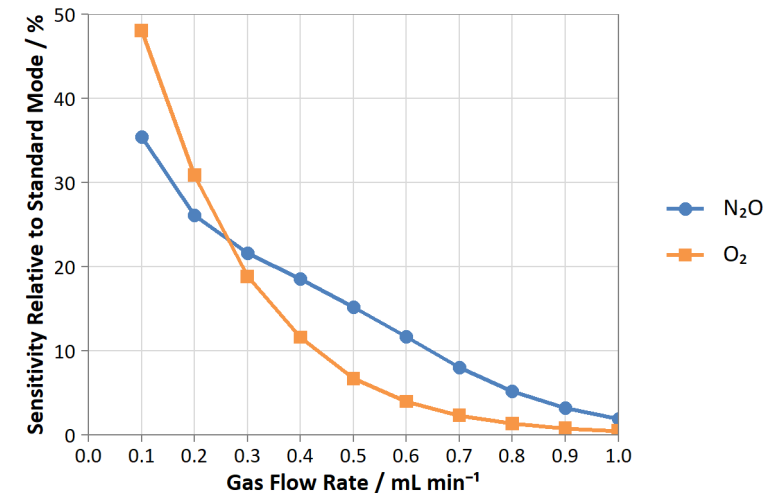

## On-Mass Removal (as Interference) with N<sub>2</sub>O

Variation of <sup>163</sup>Dy<sup>16</sup>O<sup>+</sup> Interference with N<sub>2</sub>O Flow Rate  
(On-Mass: Q1 = 179, Q3 = 179)

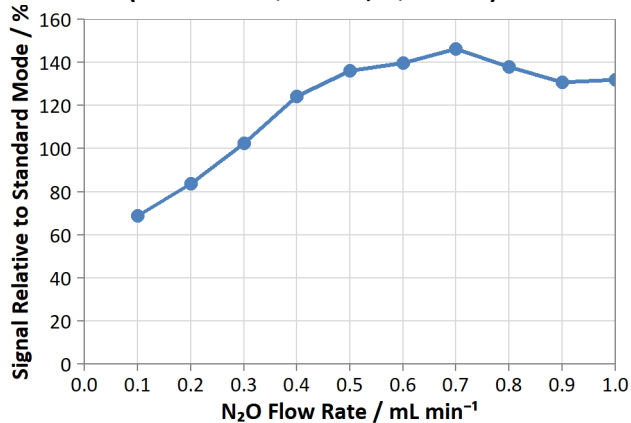

Variation of <sup>163</sup>Dy<sup>2+</sup> Interference with N<sub>2</sub>O Flow Rate  
(On-Mass: Q1 = 81.5, Q3 = 81.5)

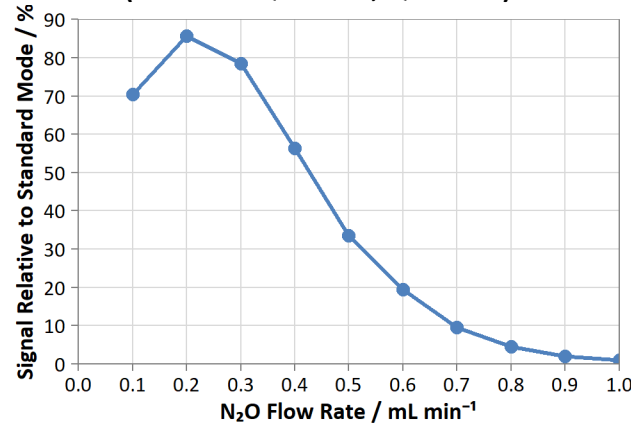

## Asymmetric Charge Transfer (with N<sub>2</sub>O)

[NO CHARGE TRANSFER REACTION OBSERVED]



# Holmium

Supplementary Information B to: Characterisation of gas cell reactions for 70+ elements using N<sub>2</sub>O for ICP tandem mass spectrometry measurements

Shaun T. Lancaster<sup>a\*</sup>, Thomas Prohaska<sup>ab</sup> and Johanna Irrgeher<sup>ab</sup>

<sup>a</sup>Department of General, Analytical and Physical Chemistry, Chair of General and Analytical Chemistry, Montanuniversität Leoben, Leoben, Austria.

<sup>b</sup>Department of Physics and Astronomy, University of Calgary, Calgary, Canada.



## Mass-Shift with N<sub>2</sub>O and O<sub>2</sub>

Major Product Ions of <sup>165</sup>Ho<sup>+</sup> with N<sub>2</sub>O Reaction Gas

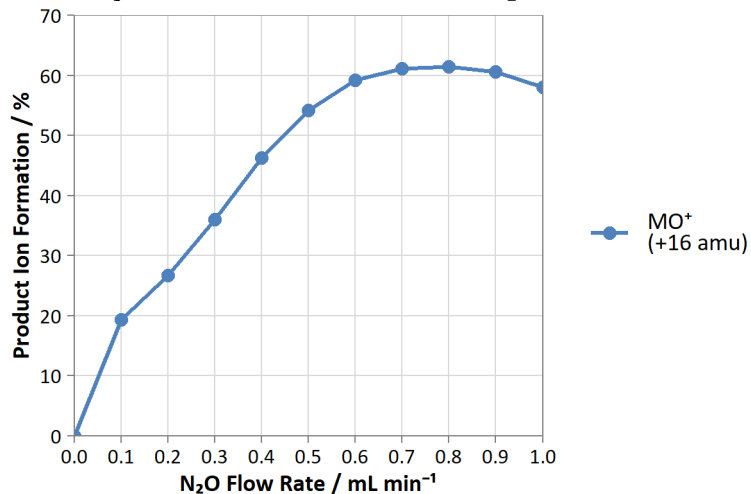

Major Product Ions of <sup>165</sup>Ho<sup>+</sup> with O<sub>2</sub> Reaction Gas

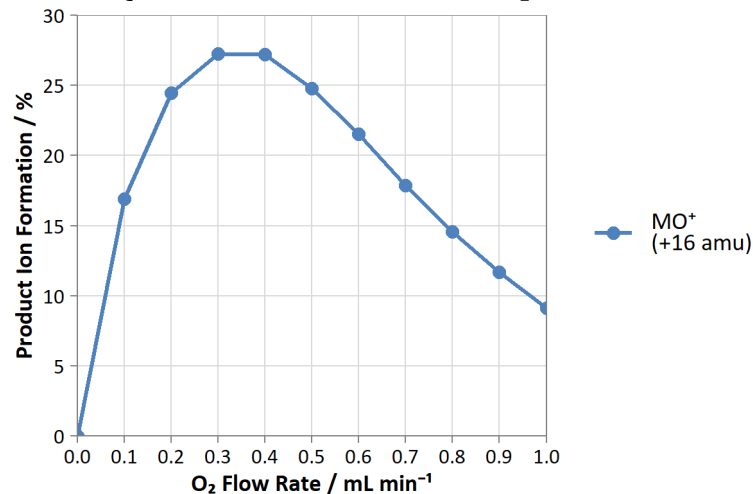

## On-Mass with N<sub>2</sub>O and O<sub>2</sub>

On-Mass Profile of <sup>165</sup>Ho<sup>+</sup> with N<sub>2</sub>O and O<sub>2</sub>

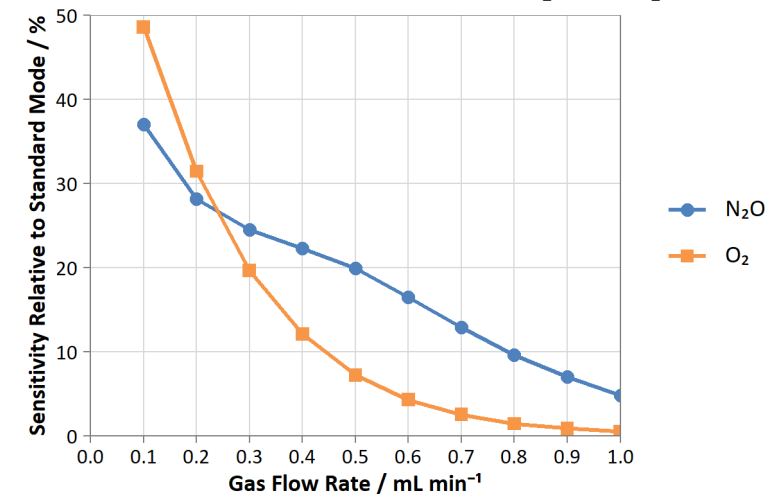

## On-Mass Removal (as Interference) with N<sub>2</sub>O

Variation of <sup>165</sup>Ho<sup>16</sup>O<sup>+</sup> Interference with N<sub>2</sub>O Flow Rate (On-Mass: Q1 = 181, Q3 = 181)

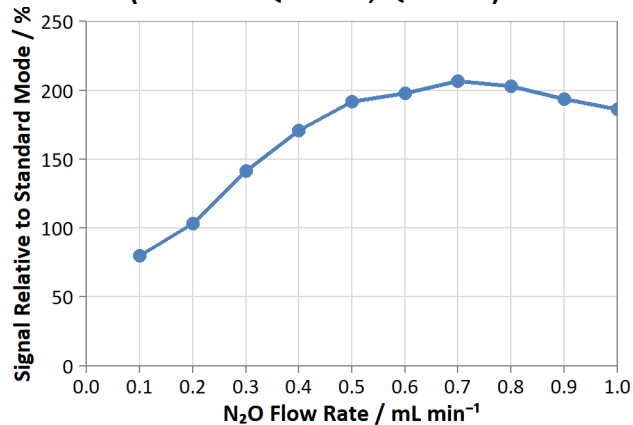

Variation of <sup>165</sup>Ho<sup>2+</sup> Interference with N<sub>2</sub>O Flow Rate (On-Mass: Q1 = 82.5, Q3 = 82.5)

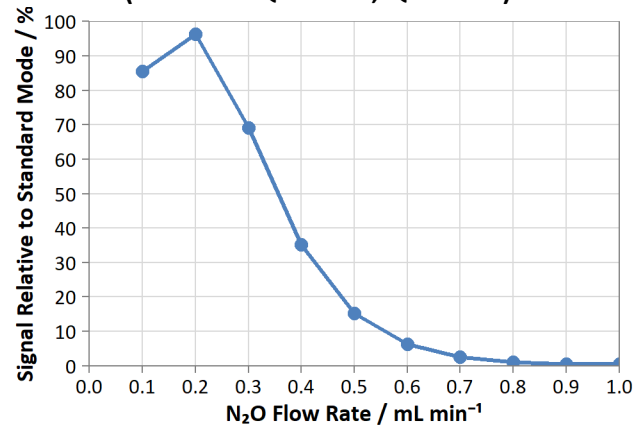

## Asymmetric Charge Transfer (with N<sub>2</sub>O)

[NO CHARGE TRANSFER REACTION OBSERVED]







## Mass-Shift with N<sub>2</sub>O and O<sub>2</sub>

Major Product Ions of <sup>166</sup>Er<sup>+</sup> with N<sub>2</sub>O Reaction Gas

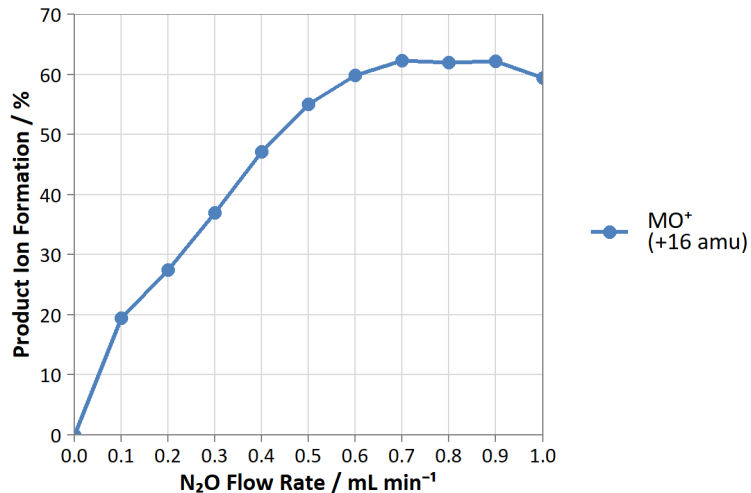

Major Product Ions of <sup>166</sup>Er<sup>+</sup> with O<sub>2</sub> Reaction Gas

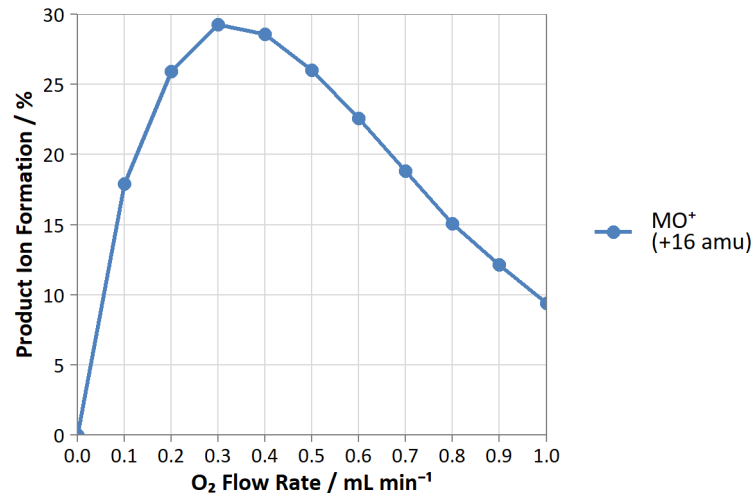

## On-Mass with N<sub>2</sub>O and O<sub>2</sub>

On-Mass Profile of <sup>166</sup>Er<sup>+</sup> with N<sub>2</sub>O and O<sub>2</sub>

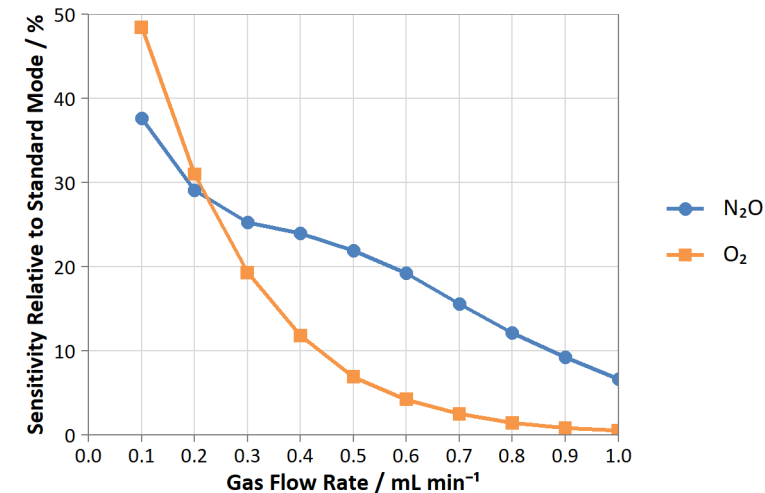

## On-Mass Removal (as Interference) with N<sub>2</sub>O

Variation of <sup>166</sup>Er<sup>16</sup>O<sup>+</sup> Interference with N<sub>2</sub>O Flow Rate  
(On-Mass: Q1 = 182, Q3 = 182)

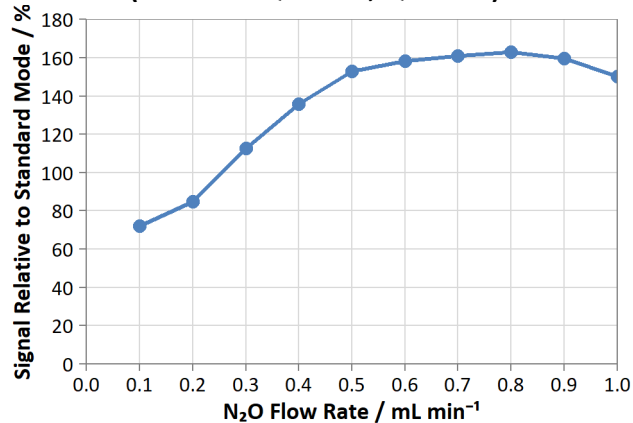

Variation of <sup>166</sup>Er<sup>2+</sup> Interference with N<sub>2</sub>O Flow Rate  
(On-Mass: Q1 = 83, Q3 = 83)

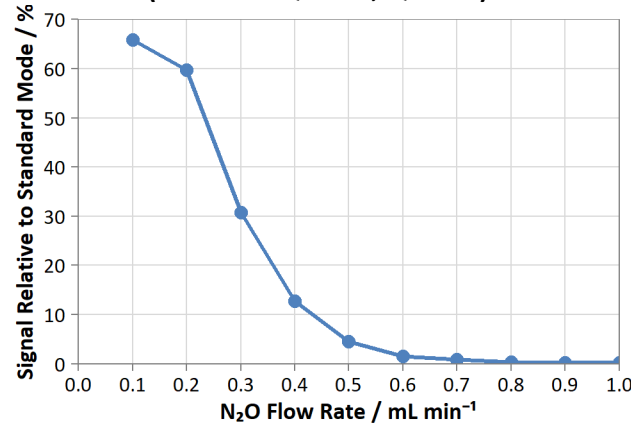

## Asymmetric Charge Transfer (with N<sub>2</sub>O)

[NO CHARGE TRANSFER REACTION OBSERVED]

# Thulium

Supplementary Information B to: Characterisation of gas cell reactions for 70+ elements using N<sub>2</sub>O for ICP tandem mass spectrometry measurements

Shaun T. Lancaster<sup>a\*</sup>, Thomas Prohaska<sup>ab</sup> and Johanna Irrgeher<sup>ab</sup>

<sup>a</sup>Department of General, Analytical and Physical Chemistry, Chair of General and Analytical Chemistry, Montanuniversität Leoben, Leoben, Austria.

<sup>b</sup>Department of Physics and Astronomy, University of Calgary, Calgary, Canada.



## Mass-Shift with N<sub>2</sub>O and O<sub>2</sub>

Major Product Ions of <sup>169</sup>Tm<sup>+</sup> with N<sub>2</sub>O Reaction Gas

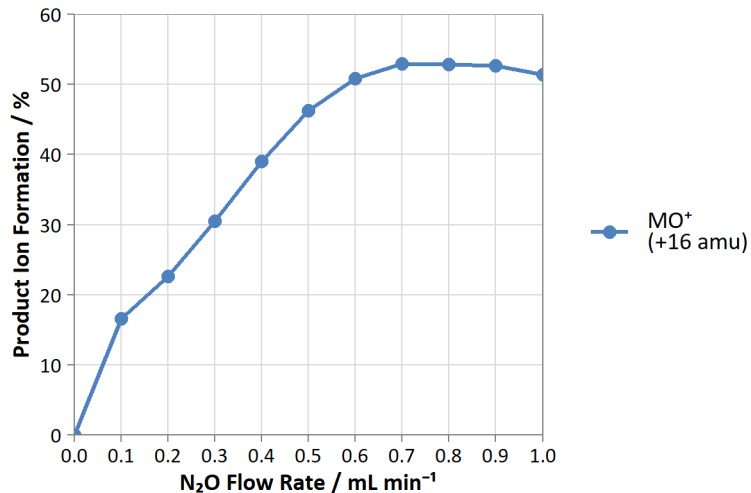

Major Product Ions of <sup>169</sup>Tm<sup>+</sup> with O<sub>2</sub> Reaction Gas

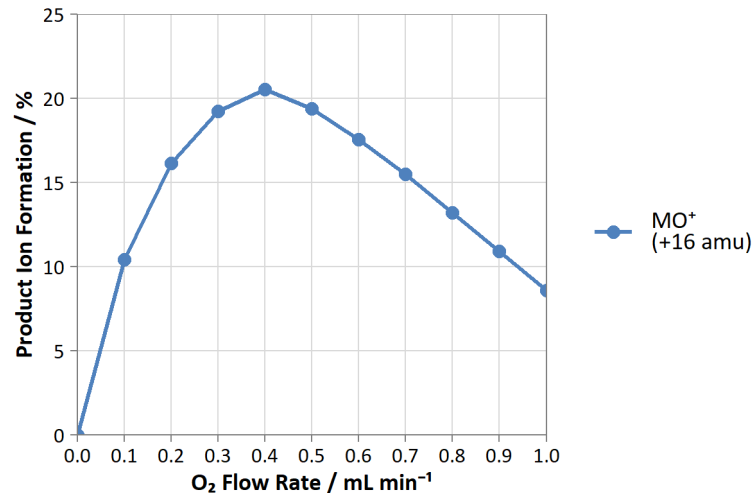

## On-Mass with N<sub>2</sub>O and O<sub>2</sub>

On-Mass Profile of <sup>169</sup>Tm<sup>+</sup> with N<sub>2</sub>O and O<sub>2</sub>

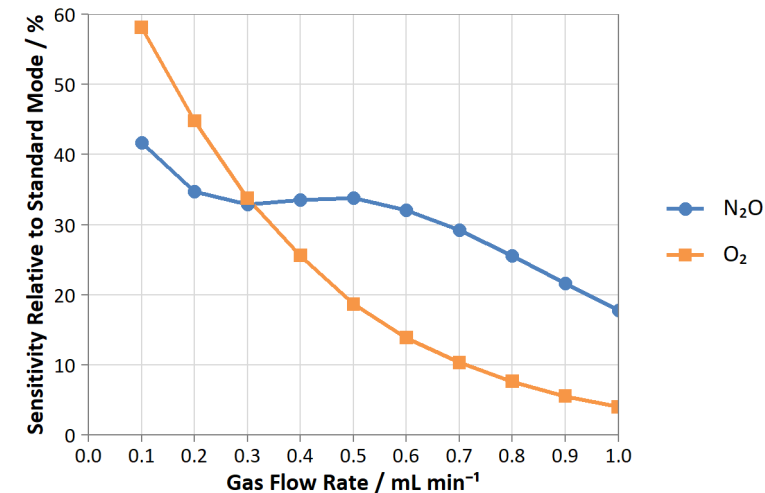

## On-Mass Removal (as Interference) with N<sub>2</sub>O

Variation of <sup>169</sup>Tm<sup>16</sup>O<sup>+</sup> Interference with N<sub>2</sub>O Flow Rate (On-Mass: Q1 = 185, Q3 = 185)

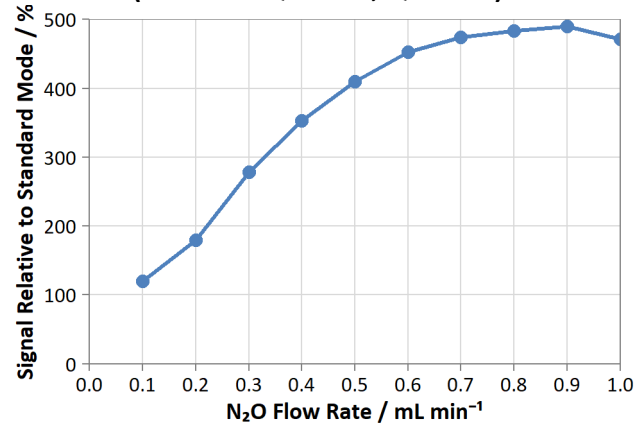

Variation of <sup>169</sup>Tm<sup>2+</sup> Interference with N<sub>2</sub>O Flow Rate (On-Mass: Q1 = 84.5, Q3 = 84.5)

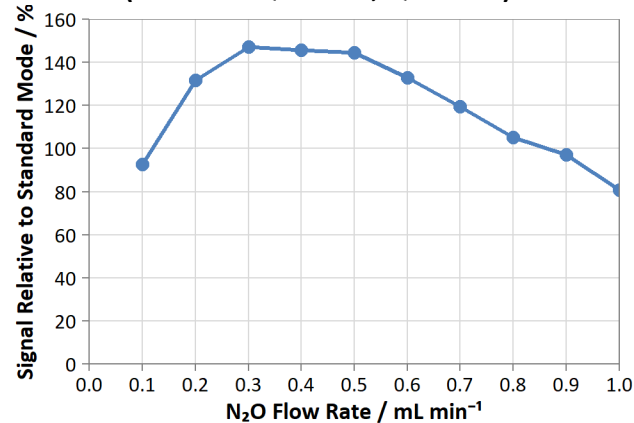

## Asymmetric Charge Transfer (with N<sub>2</sub>O)

[NO CHARGE TRANSFER REACTION OBSERVED]



# Ytterbium

Supplementary Information B to: Characterisation of gas cell reactions for 70+ elements using N<sub>2</sub>O for ICP tandem mass spectrometry measurements

Shaun T. Lancaster<sup>a\*</sup>, Thomas Prohaska<sup>ab</sup> and Johanna Irrgeher<sup>ab</sup>

<sup>a</sup>Department of General, Analytical and Physical Chemistry, Chair of General and Analytical Chemistry, Montanuniversität Leoben, Leoben, Austria.

<sup>b</sup>Department of Physics and Astronomy, University of Calgary, Calgary, Canada.



## Mass-Shift with N<sub>2</sub>O and O<sub>2</sub>

Major Product Ions of <sup>174</sup>Yb<sup>+</sup> with N<sub>2</sub>O Reaction Gas

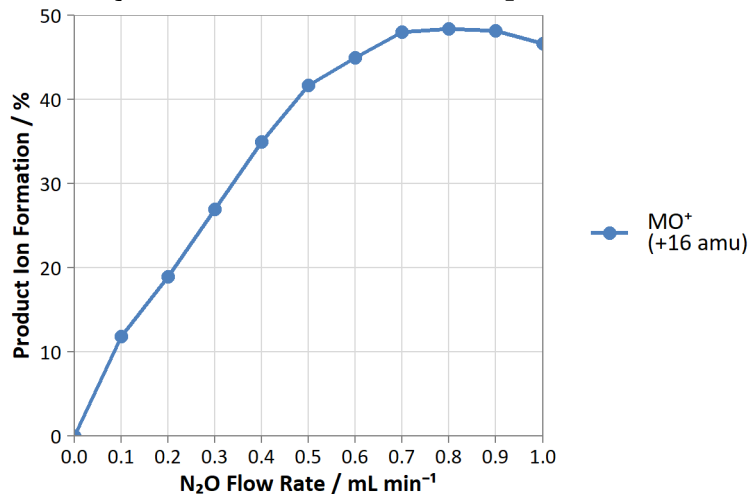

Major Product Ions of <sup>174</sup>Yb<sup>+</sup> with O<sub>2</sub> Reaction Gas

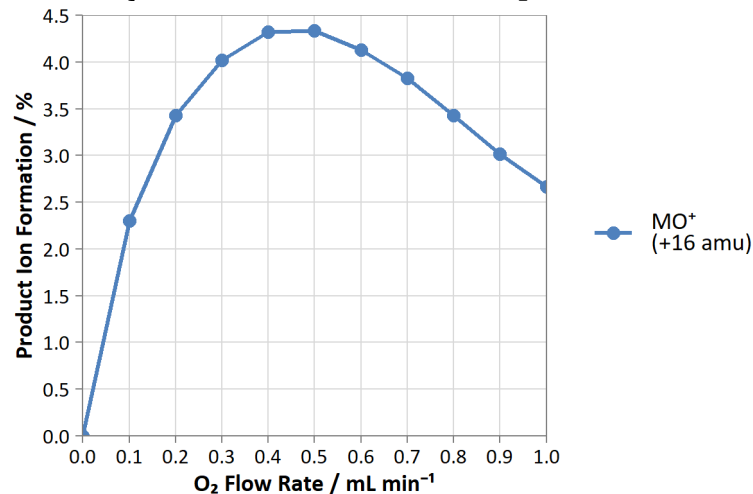

## On-Mass with N<sub>2</sub>O and O<sub>2</sub>

On-Mass Profile of <sup>174</sup>Yb<sup>+</sup> with N<sub>2</sub>O and O<sub>2</sub>

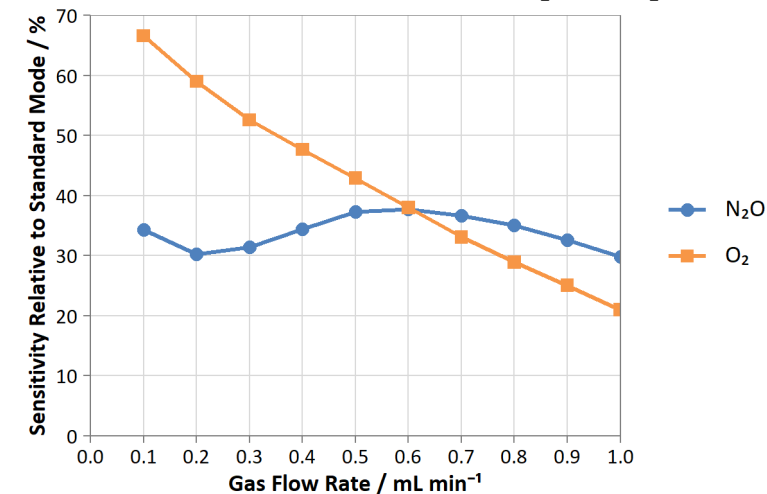

## On-Mass Removal (as Interference) with N<sub>2</sub>O

Variation of <sup>174</sup>Yb<sup>16</sup>O<sup>+</sup> Interference with N<sub>2</sub>O Flow Rate (On-Mass: Q1 = 190, Q3 = 190)

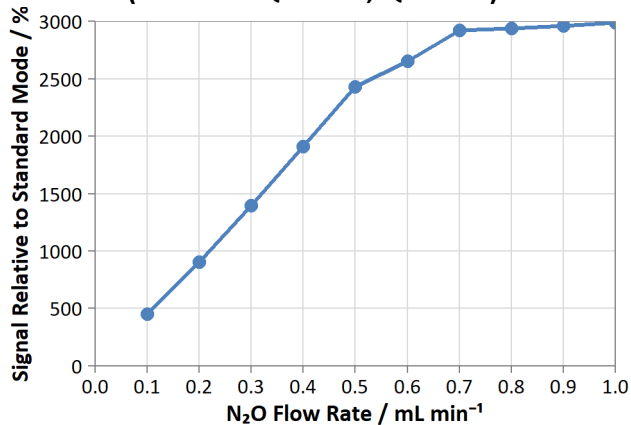

Variation of <sup>174</sup>Yb<sup>2+</sup> Interference with N<sub>2</sub>O Flow Rate (On-Mass: Q1 = 87, Q3 = 87)

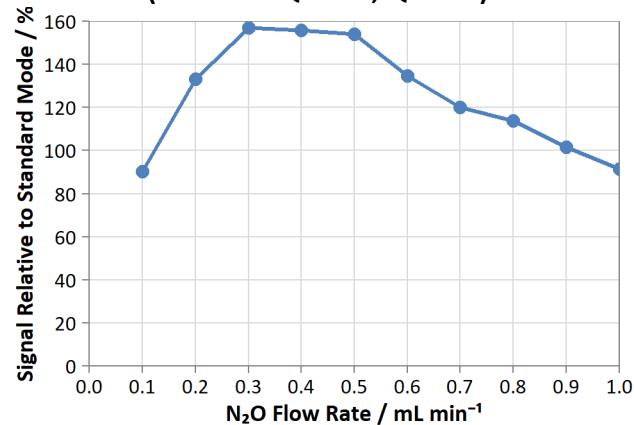

## Asymmetric Charge Transfer (with N<sub>2</sub>O)

[NO CHARGE TRANSFER REACTION OBSERVED]



# Lutetium

Supplementary Information B to: Characterisation of gas cell reactions for 70+ elements using N<sub>2</sub>O for ICP tandem mass spectrometry measurements

Shaun T. Lancaster<sup>a\*</sup>, Thomas Prohaska<sup>ab</sup> and Johanna Irrgeher<sup>ab</sup>

<sup>a</sup>Department of General, Analytical and Physical Chemistry, Chair of General and Analytical Chemistry, Montanuniversität Leoben, Leoben, Austria.

<sup>b</sup>Department of Physics and Astronomy, University of Calgary, Calgary, Canada.



## Mass-Shift with N<sub>2</sub>O and O<sub>2</sub>

Major Product Ions of <sup>175</sup>Lu<sup>+</sup> with N<sub>2</sub>O Reaction Gas

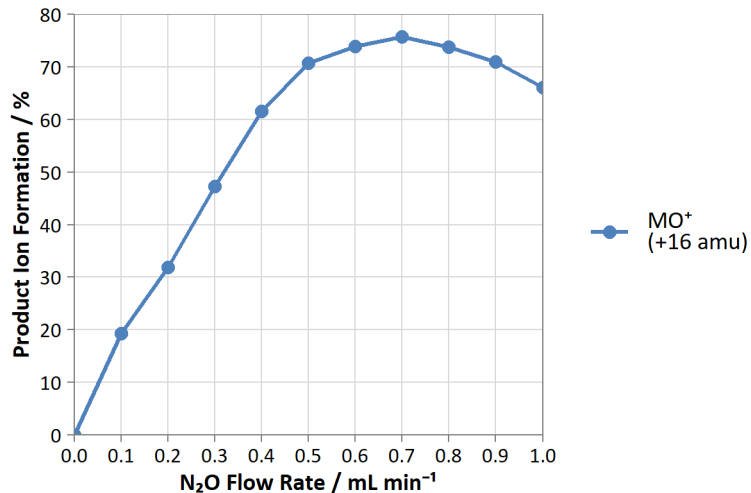

Major Product Ions of <sup>175</sup>Lu<sup>+</sup> with O<sub>2</sub> Reaction Gas

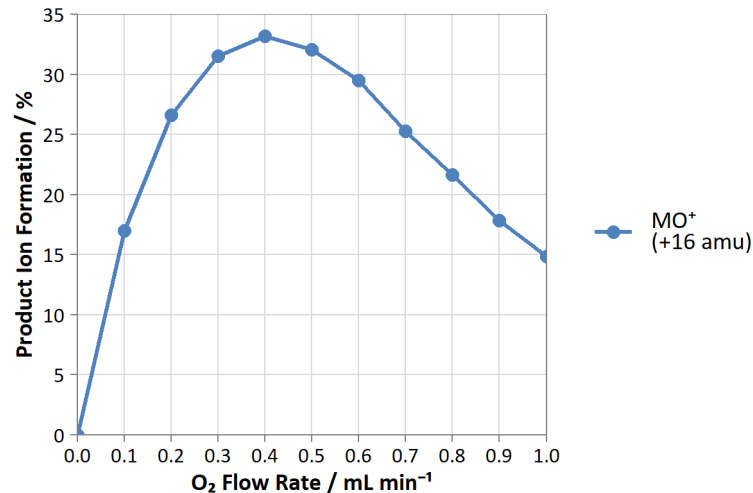

## On-Mass with N<sub>2</sub>O and O<sub>2</sub>

On-Mass Profile of <sup>175</sup>Lu<sup>+</sup> with N<sub>2</sub>O and O<sub>2</sub>

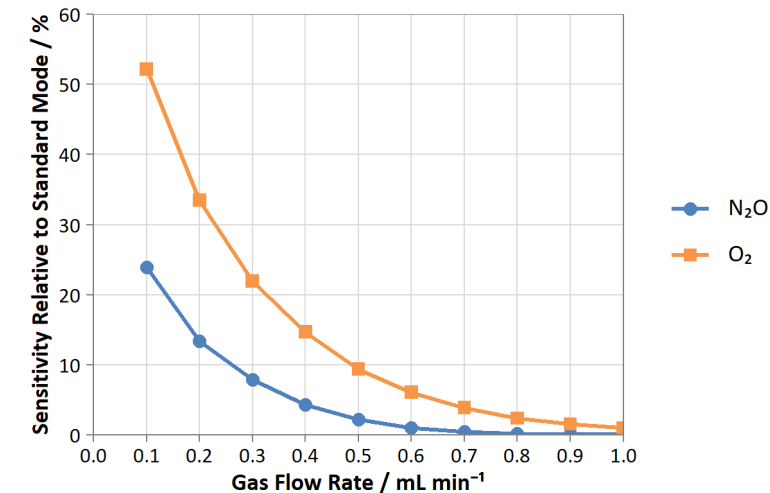

## On-Mass Removal (as Interference) with N<sub>2</sub>O

Variation of <sup>175</sup>Lu<sup>16</sup>O<sup>+</sup> Interference with N<sub>2</sub>O Flow Rate (On-Mass: Q1 = 191, Q3 = 191)

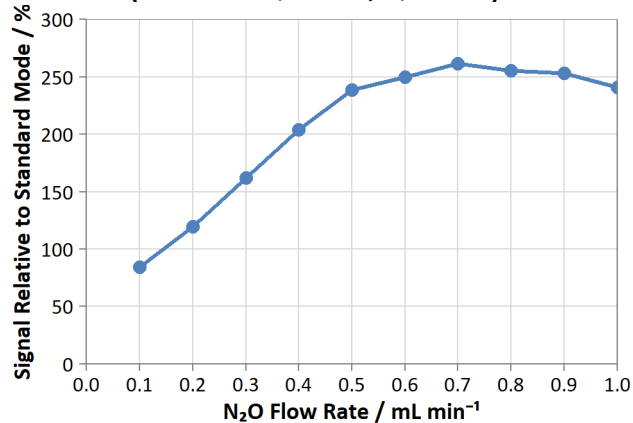

Variation of <sup>175</sup>Lu<sup>2+</sup> Interference with N<sub>2</sub>O Flow Rate (On-Mass: Q1 = 87.5, Q3 = 87.5)

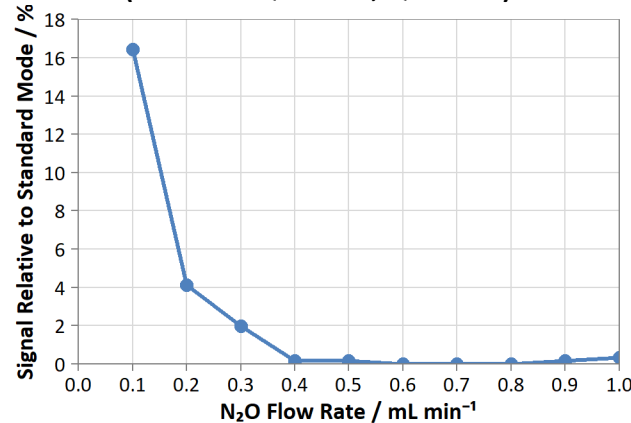

## Asymmetric Charge Transfer (with N<sub>2</sub>O)

[NO CHARGE TRANSFER REACTION OBSERVED]



# Hafnium

Supplementary Information B to: Characterisation of gas cell reactions for 70+ elements using N<sub>2</sub>O for ICP tandem mass spectrometry measurements

Shaun T. Lancaster<sup>a\*</sup>, Thomas Prohaska<sup>ab</sup> and Johanna Irrgeher<sup>ab</sup>

<sup>a</sup>Department of General, Analytical and Physical Chemistry, Chair of General and Analytical Chemistry, Montanuniversität Leoben, Leoben, Austria.

<sup>b</sup>Department of Physics and Astronomy, University of Calgary, Calgary, Canada.



## Mass-Shift with N<sub>2</sub>O and O<sub>2</sub>

Major Product Ions of <sup>180</sup>Hf<sup>+</sup> with N<sub>2</sub>O Reaction Gas

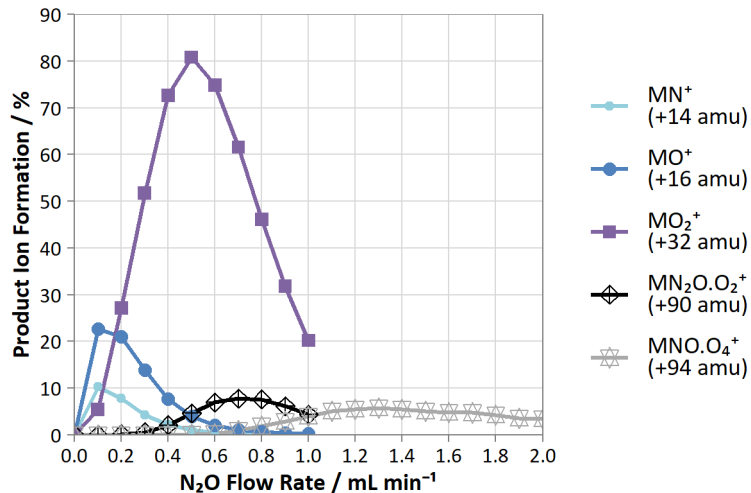

Major Product Ions of <sup>180</sup>Hf<sup>+</sup> with O<sub>2</sub> Reaction Gas

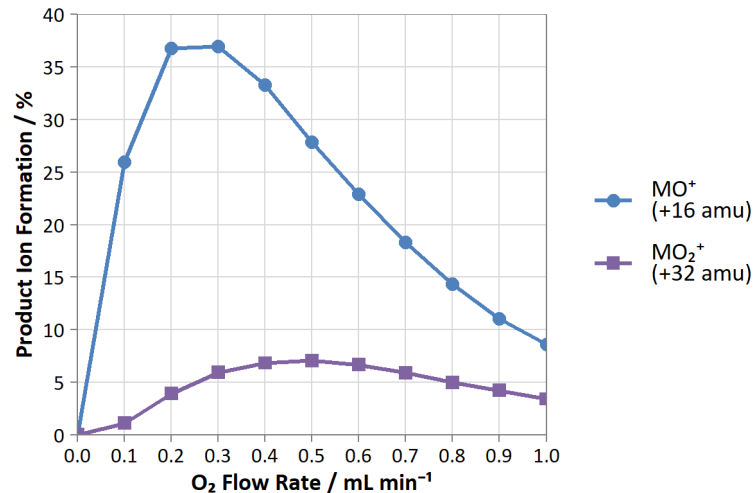

## On-Mass with N<sub>2</sub>O and O<sub>2</sub>

On-Mass Profile of <sup>180</sup>Hf<sup>+</sup> with N<sub>2</sub>O and O<sub>2</sub>

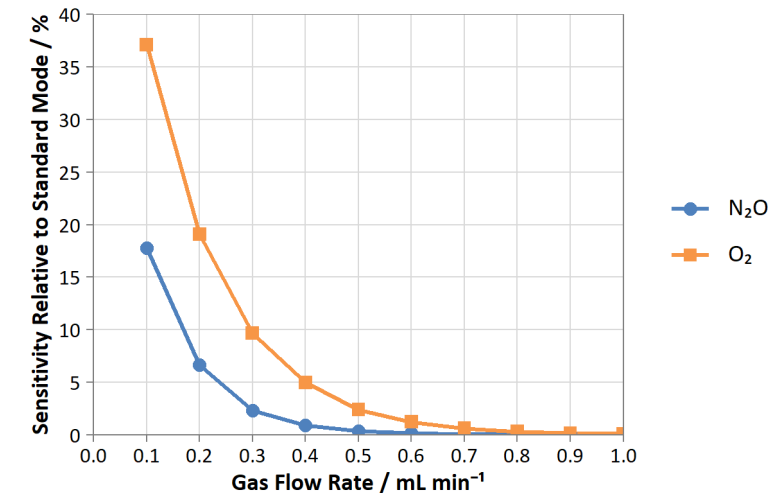

## On-Mass Removal (as Interference) with N<sub>2</sub>O

Variation of <sup>180</sup>Hf<sup>16</sup>O<sup>+</sup> Interference with N<sub>2</sub>O Flow Rate (On-Mass: Q1 = 196, Q3 = 196)

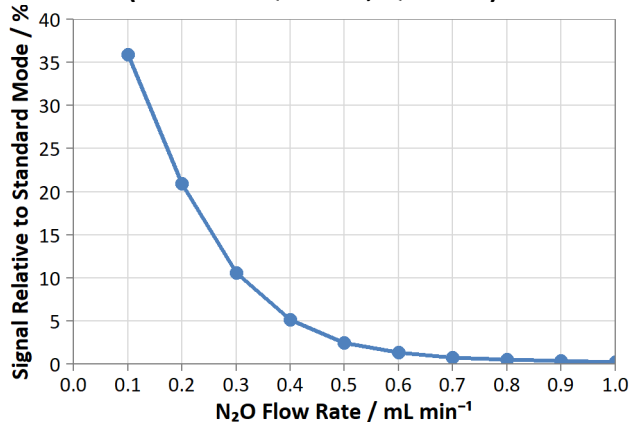

Variation of <sup>180</sup>Hf<sup>2+</sup> Interference with N<sub>2</sub>O Flow Rate (On-Mass: Q1 = 90, Q3 = 90)

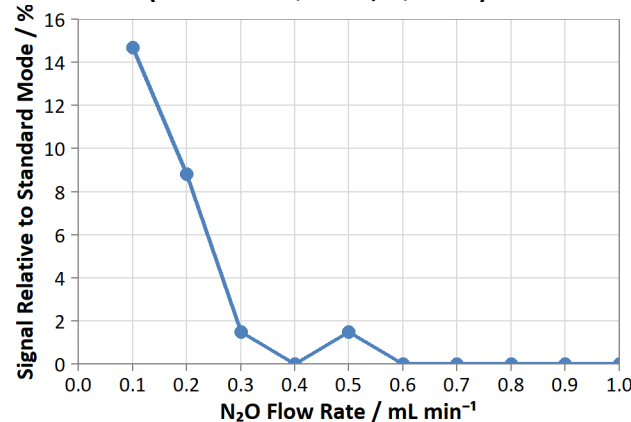

## Asymmetric Charge Transfer (with N<sub>2</sub>O)

[NO CHARGE TRANSFER REACTION OBSERVED]



## Mass-Shift with N<sub>2</sub>O and O<sub>2</sub>

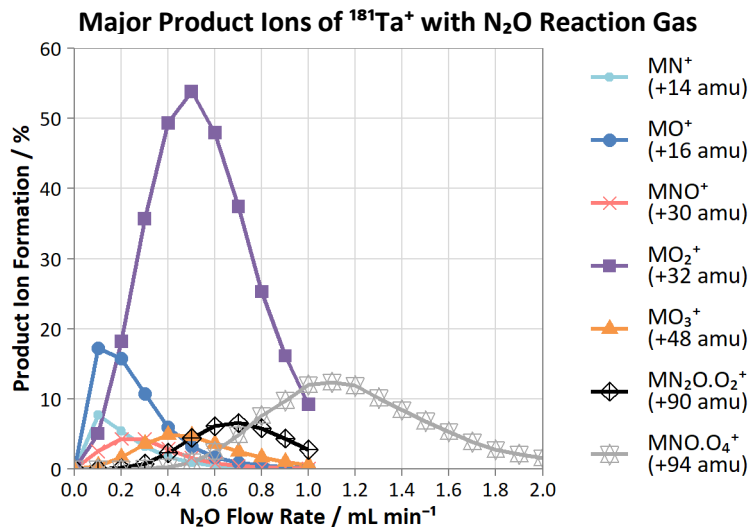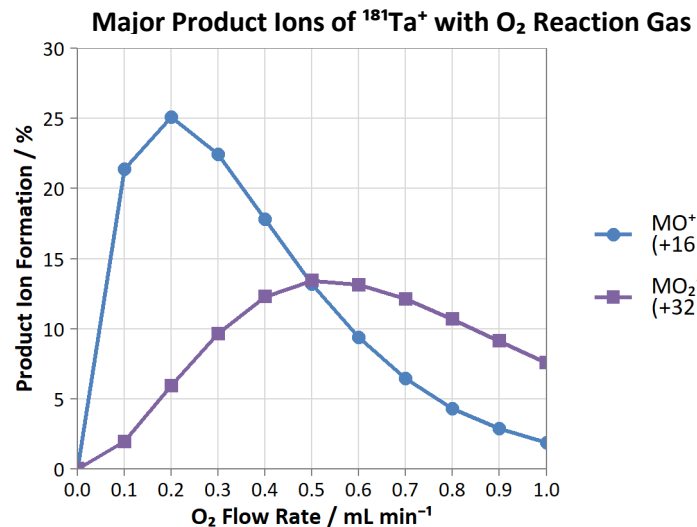

## On-Mass with N<sub>2</sub>O and O<sub>2</sub>

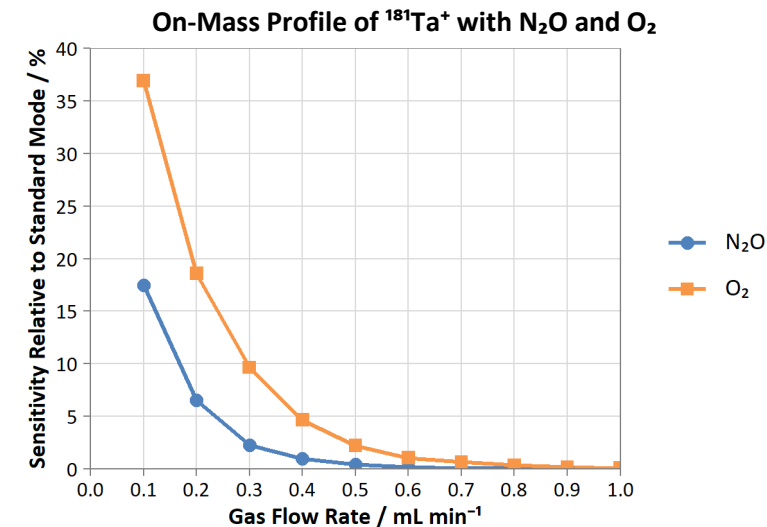

## On-Mass Removal (as Interference) with N<sub>2</sub>O

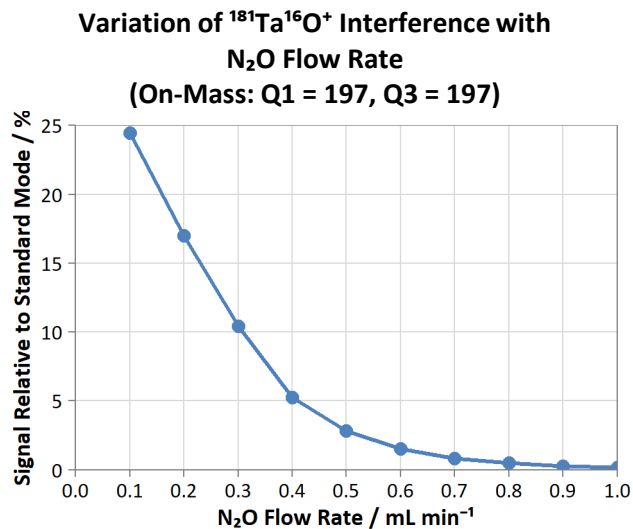

**Variation of <sup>181</sup>Ta<sup>2+</sup> Interference with N<sub>2</sub>O Flow Rate (On-Mass: Q1 = 90.5, Q3 = 90.5)**

[INSUFFICIENT DOUBLY-CHARGED ION FORMATION OBSERVED]

## Asymmetric Charge Transfer (with N<sub>2</sub>O)

[NO CHARGE TRANSFER REACTION OBSERVED]



## Mass-Shift with N<sub>2</sub>O and O<sub>2</sub>

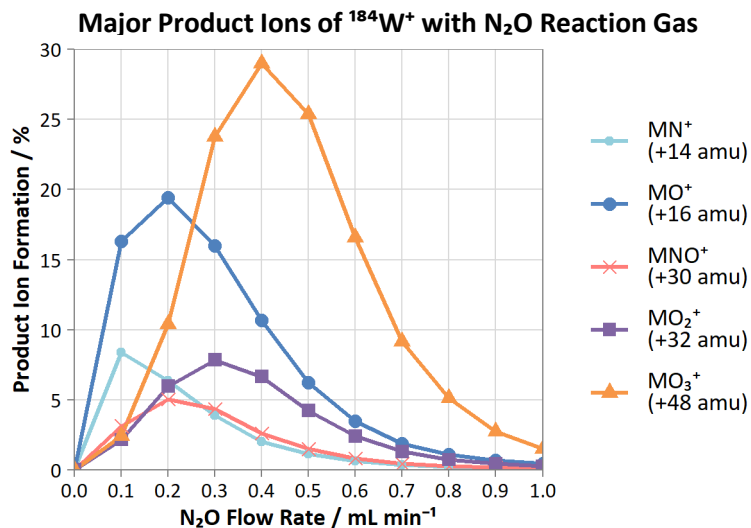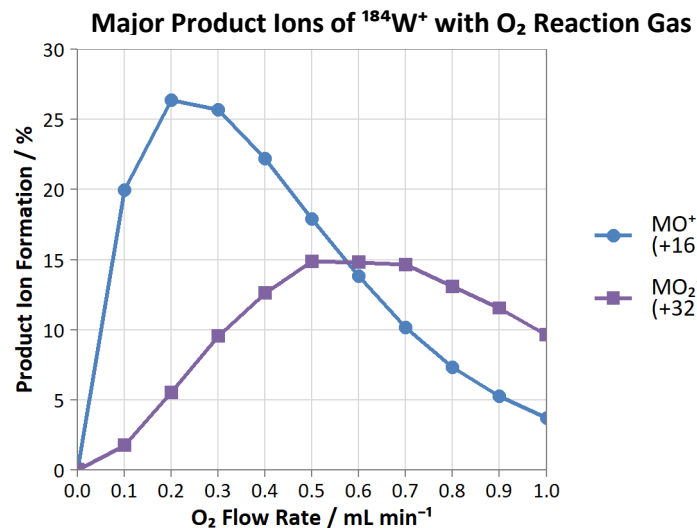

## On-Mass with N<sub>2</sub>O and O<sub>2</sub>

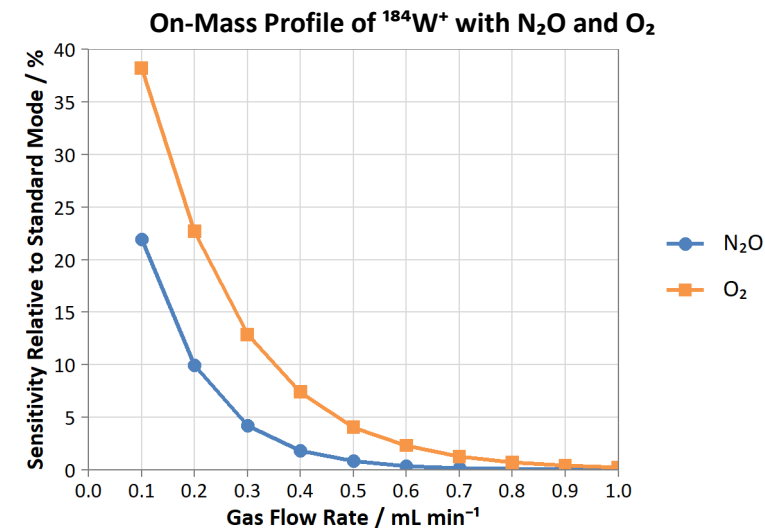

## On-Mass Removal (as Interference) with N<sub>2</sub>O

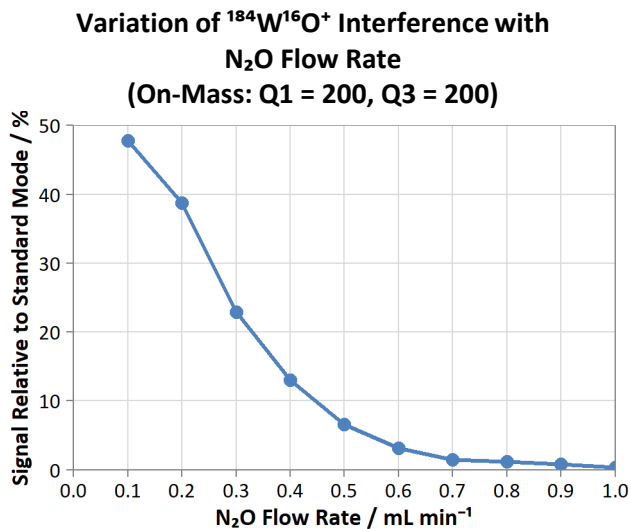

**Variation of <sup>184</sup>W<sup>2+</sup> Interference with N<sub>2</sub>O Flow Rate (On-Mass: Q1 = 92, Q3 = 92)**

[INSUFFICIENT DOUBLY-CHARGED ION FORMATION OBSERVED]

## Asymmetric Charge Transfer (with N<sub>2</sub>O)

[NO CHARGE TRANSFER REACTION OBSERVED]

# Rhenium

Supplementary Information B to: Characterisation of gas cell reactions for 70+ elements using N<sub>2</sub>O for ICP tandem mass spectrometry measurements

Shaun T. Lancaster<sup>a\*</sup>, Thomas Prohaska<sup>ab</sup> and Johanna Irrgeher<sup>ab</sup>

<sup>a</sup>Department of General, Analytical and Physical Chemistry, Chair of General and Analytical Chemistry, Montanuniversität Leoben, Leoben, Austria.

<sup>b</sup>Department of Physics and Astronomy, University of Calgary, Calgary, Canada.



## Mass-Shift with N<sub>2</sub>O and O<sub>2</sub>

Major Product Ions of <sup>187</sup>Re<sup>+</sup> with N<sub>2</sub>O Reaction Gas

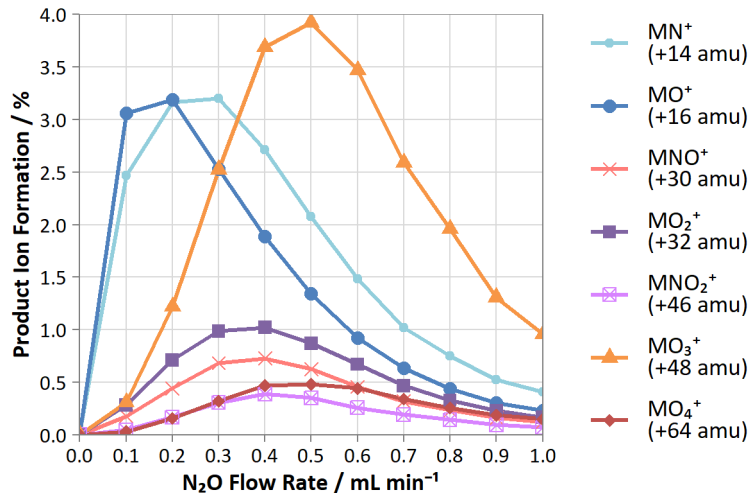

Major Product Ions of <sup>187</sup>Re<sup>+</sup> with O<sub>2</sub> Reaction Gas

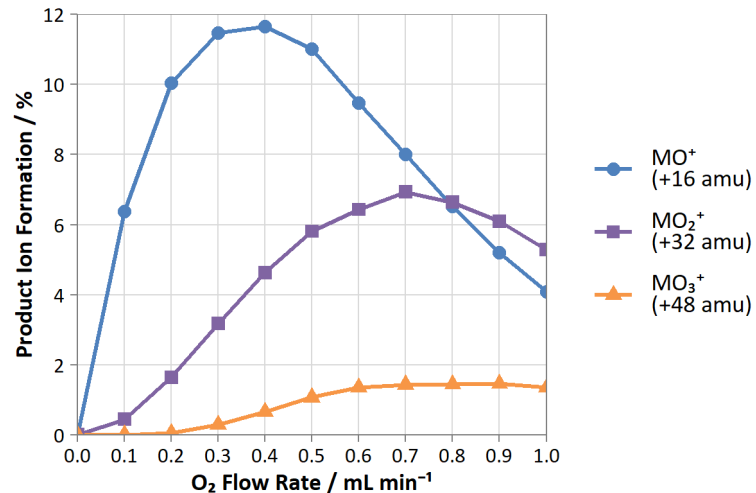

## On-Mass with N<sub>2</sub>O and O<sub>2</sub>

On-Mass Profile of <sup>187</sup>Re<sup>+</sup> with N<sub>2</sub>O and O<sub>2</sub>

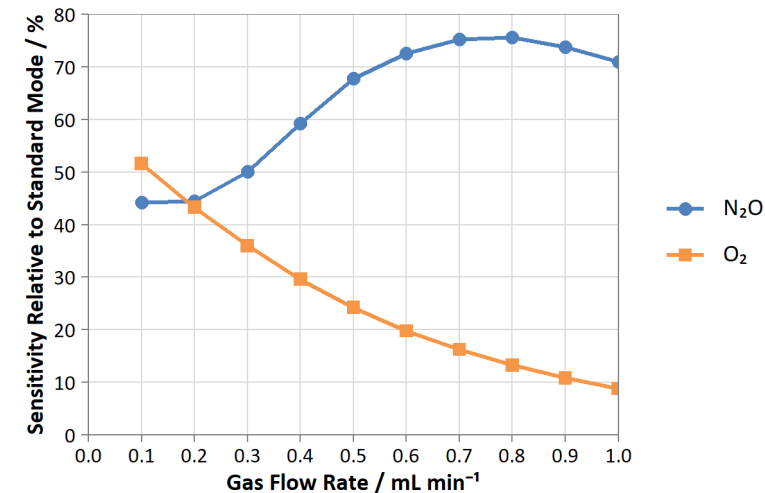

## On-Mass Removal (as Interference) with N<sub>2</sub>O

Variation of <sup>187</sup>Re<sup>16</sup>O<sup>+</sup> Interference with N<sub>2</sub>O Flow Rate  
(On-Mass: Q1 = 203, Q3 = 203)

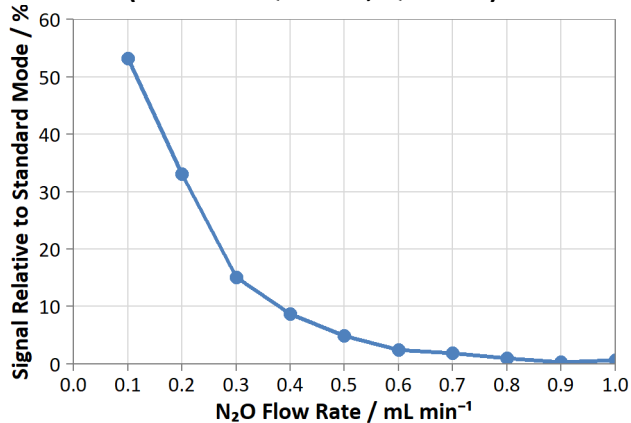

Variation of <sup>187</sup>Re<sup>2+</sup> Interference with N<sub>2</sub>O Flow Rate  
(On-Mass: Q1 = 93.5, Q3 = 93.5)

[INSUFFICIENT DOUBLY-CHARGED ION FORMATION OBSERVED]

## Asymmetric Charge Transfer (with N<sub>2</sub>O)

[NO CHARGE TRANSFER REACTION OBSERVED]







## Mass-Shift with N<sub>2</sub>O and O<sub>2</sub>

Major Product Ions of <sup>189</sup>Os<sup>+</sup> with N<sub>2</sub>O Reaction Gas

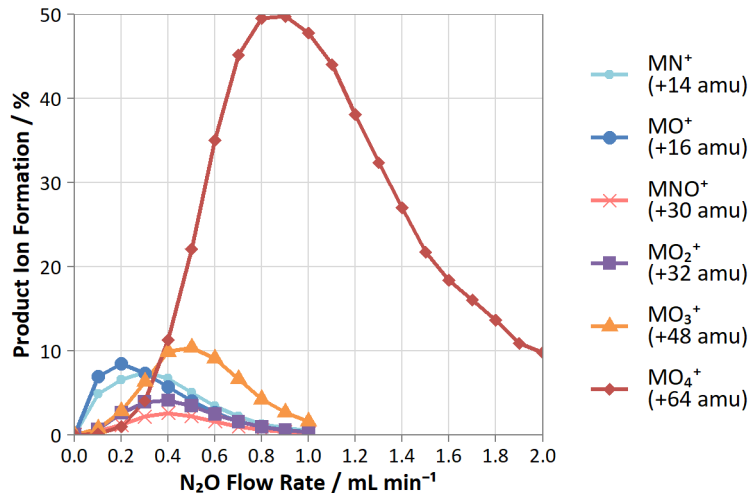

Major Product Ions of <sup>189</sup>Os<sup>+</sup> with O<sub>2</sub> Reaction Gas

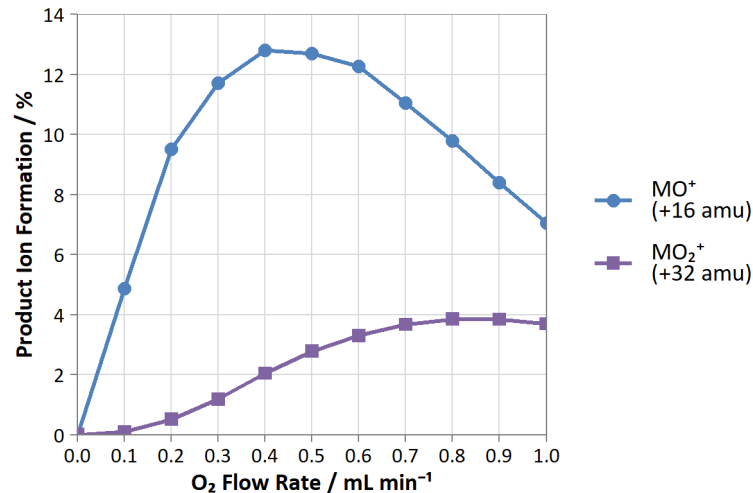

## On-Mass with N<sub>2</sub>O and O<sub>2</sub>

On-Mass Profile of <sup>189</sup>Os<sup>+</sup> with N<sub>2</sub>O and O<sub>2</sub>

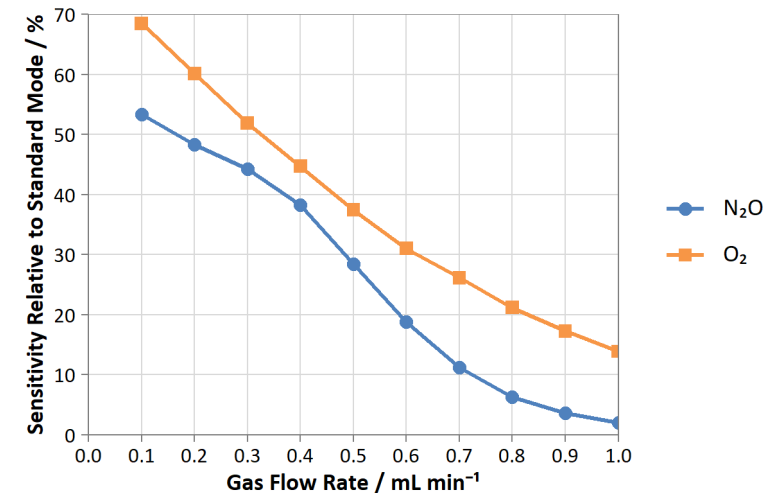

## On-Mass Removal (as Interference) with N<sub>2</sub>O

Variation of <sup>189</sup>Os<sup>16</sup>O<sup>+</sup> Interference with N<sub>2</sub>O Flow Rate  
(On-Mass: Q1 = 205, Q3 = 205)

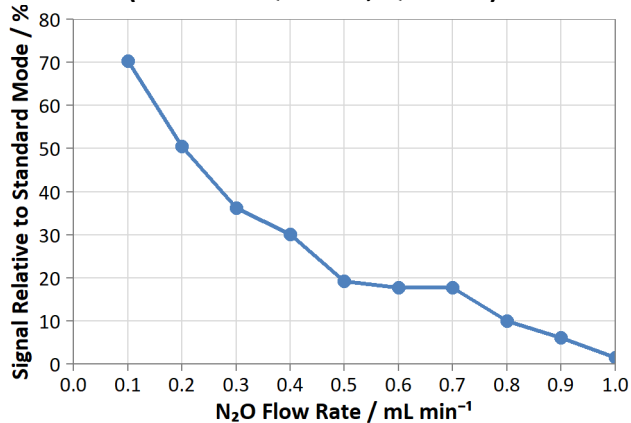

Variation of <sup>189</sup>Os<sup>2+</sup> Interference with N<sub>2</sub>O Flow Rate  
(On-Mass: Q1 = 94.5, Q3 = 94.5)

[INSUFFICIENT DOUBLY-CHARGED ION FORMATION OBSERVED]

## Asymmetric Charge Transfer (with N<sub>2</sub>O)

[NO CHARGE TRANSFER REACTION OBSERVED]



## Mass-Shift with N<sub>2</sub>O and O<sub>2</sub>

Major Product Ions of <sup>193</sup>Ir<sup>+</sup> with N<sub>2</sub>O Reaction Gas

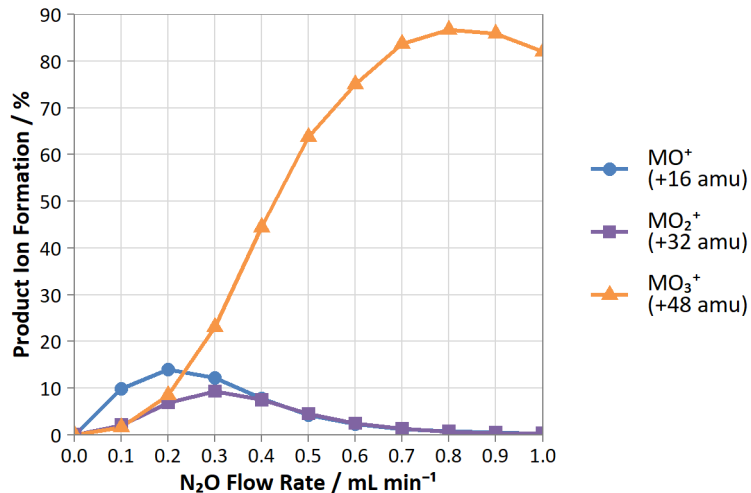

Major Product Ions of <sup>193</sup>Ir<sup>+</sup> with O<sub>2</sub> Reaction Gas

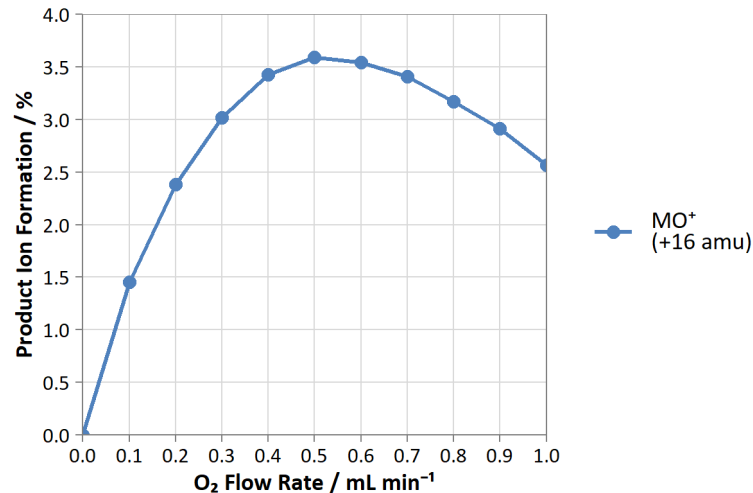

## On-Mass with N<sub>2</sub>O and O<sub>2</sub>

On-Mass Profile of <sup>193</sup>Ir<sup>+</sup> with N<sub>2</sub>O and O<sub>2</sub>

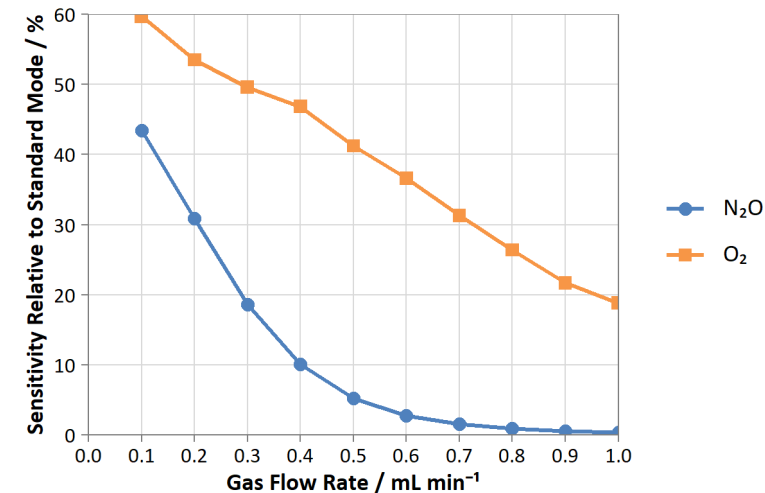

## On-Mass Removal (as Interference) with N<sub>2</sub>O

Variation of <sup>193</sup>Ir<sup>16</sup>O<sup>+</sup> Interference with N<sub>2</sub>O Flow Rate (On-Mass: Q1 = 209, Q3 = 209)

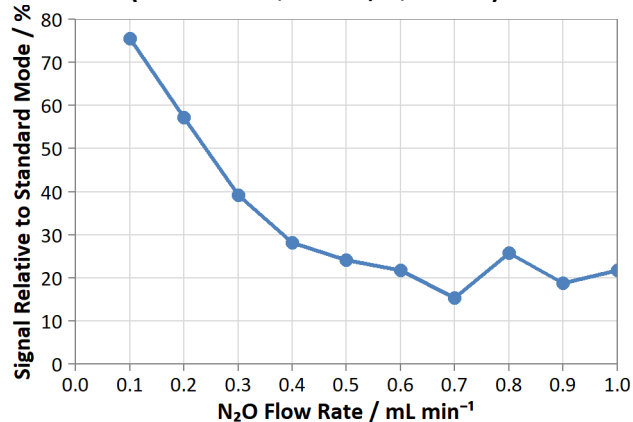

Variation of <sup>193</sup>Ir<sup>2+</sup> Interference with N<sub>2</sub>O Flow Rate (On-Mass: Q1 = 96.5, Q3 = 96.5)

[INSUFFICIENT DOUBLY-CHARGED ION FORMATION OBSERVED]

## Asymmetric Charge Transfer (with N<sub>2</sub>O)

[NO CHARGE TRANSFER REACTION OBSERVED]



## Mass-Shift with N<sub>2</sub>O and O<sub>2</sub>

Major Product Ions of <sup>195</sup>Pt<sup>+</sup> with N<sub>2</sub>O Reaction Gas

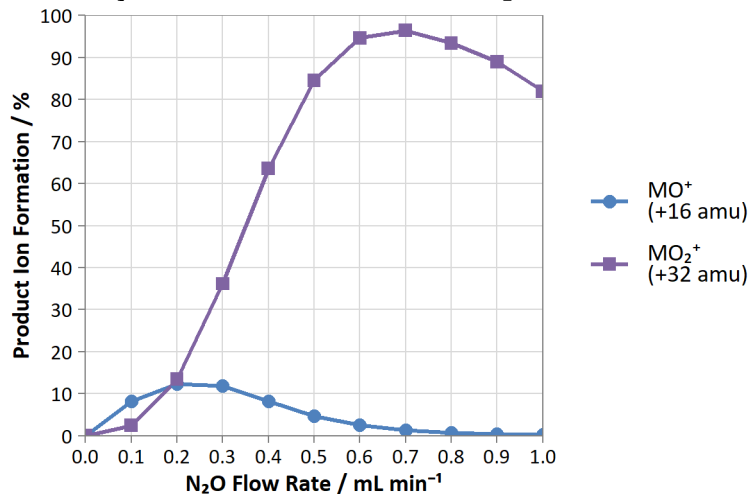

Major Product Ions of <sup>195</sup>Pt<sup>+</sup> with O<sub>2</sub> Reaction Gas

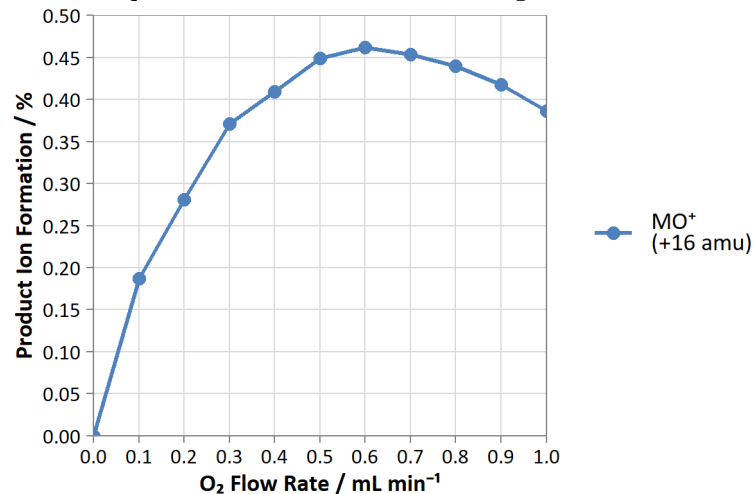

## On-Mass with N<sub>2</sub>O and O<sub>2</sub>

On-Mass Profile of <sup>195</sup>Pt<sup>+</sup> with N<sub>2</sub>O and O<sub>2</sub>

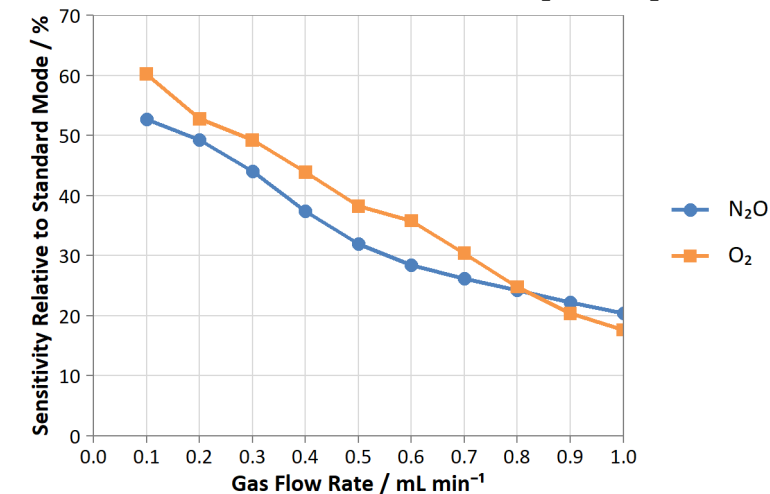

## On-Mass Removal (as Interference) with N<sub>2</sub>O

Variation of <sup>195</sup>Pt<sup>16</sup>O<sup>+</sup> Interference with N<sub>2</sub>O Flow Rate  
(On-Mass: Q1 = 211, Q3 = 211)

[INSUFFICIENT OXIDE FORMATION OBSERVED]

Variation of <sup>195</sup>Pt<sup>2+</sup> Interference with N<sub>2</sub>O Flow Rate  
(On-Mass: Q1 = 97.5, Q3 = 97.5)

[INSUFFICIENT DOUBLY-CHARGED ION FORMATION OBSERVED]

## Asymmetric Charge Transfer (with N<sub>2</sub>O)

[NO CHARGE TRANSFER REACTION OBSERVED]



## Mass-Shift with N<sub>2</sub>O and O<sub>2</sub>

Major Product Ions of <sup>197</sup>Au<sup>+</sup> with N<sub>2</sub>O Reaction Gas

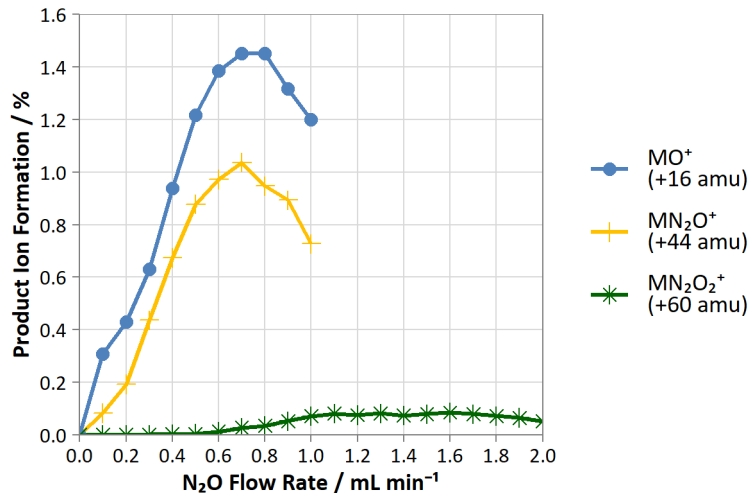

Major Product Ions of <sup>197</sup>Au<sup>+</sup> with O<sub>2</sub> Reaction Gas

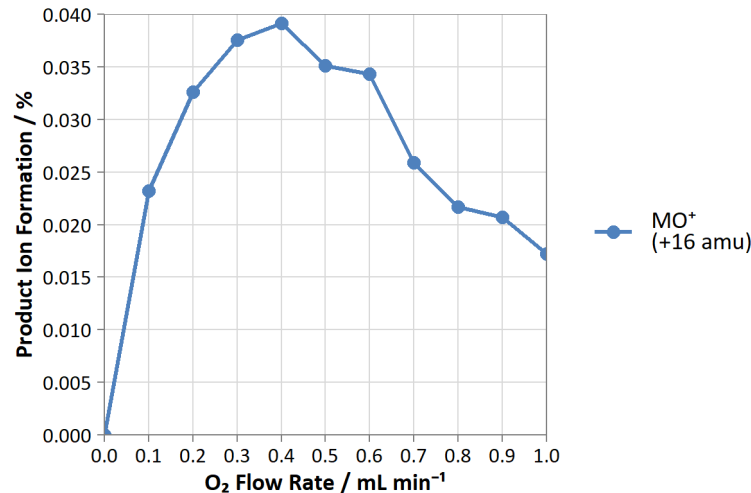

## On-Mass with N<sub>2</sub>O and O<sub>2</sub>

On-Mass Profile of <sup>197</sup>Au<sup>+</sup> with N<sub>2</sub>O and O<sub>2</sub>

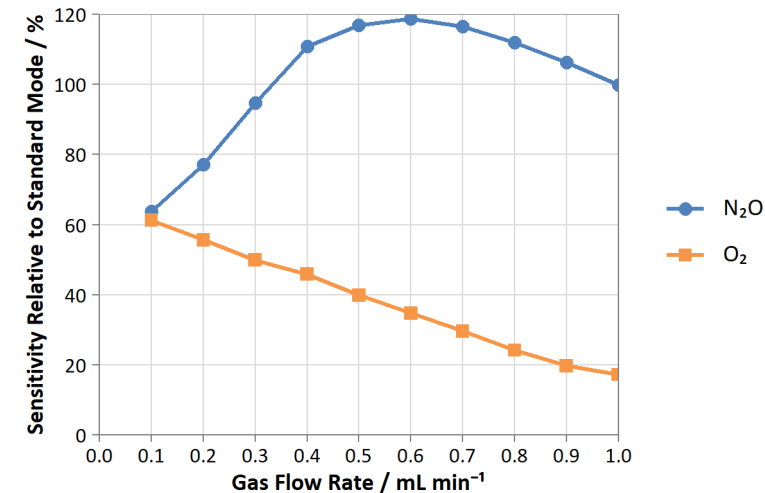

## On-Mass Removal (as Interference) with N<sub>2</sub>O

Variation of <sup>197</sup>Au<sup>16</sup>O<sup>+</sup> Interference with N<sub>2</sub>O Flow Rate  
(On-Mass: Q1 = 213, Q3 = 213)

[INSUFFICIENT OXIDE FORMATION OBSERVED]

Variation of <sup>197</sup>Au<sup>2+</sup> Interference with N<sub>2</sub>O Flow Rate  
(On-Mass: Q1 = 98.5, Q3 = 98.5)

[INSUFFICIENT DOUBLY-CHARGED ION FORMATION OBSERVED]

## Asymmetric Charge Transfer (with N<sub>2</sub>O)

[NO CHARGE TRANSFER REACTION OBSERVED]

# Mercury

Supplementary Information B to: Characterisation of gas cell reactions for 70+ elements using N<sub>2</sub>O for ICP tandem mass spectrometry measurements

Shaun T. Lancaster<sup>a\*</sup>, Thomas Prohaska<sup>ab</sup> and Johanna Irrgeher<sup>ab</sup>

<sup>a</sup>Department of General, Analytical and Physical Chemistry, Chair of General and Analytical Chemistry, Montanuniversität Leoben, Leoben, Austria.

<sup>b</sup>Department of Physics and Astronomy, University of Calgary, Calgary, Canada.



## Mass-Shift with N<sub>2</sub>O and O<sub>2</sub>

Major Product Ions of <sup>202</sup>Hg<sup>+</sup> with N<sub>2</sub>O Reaction Gas

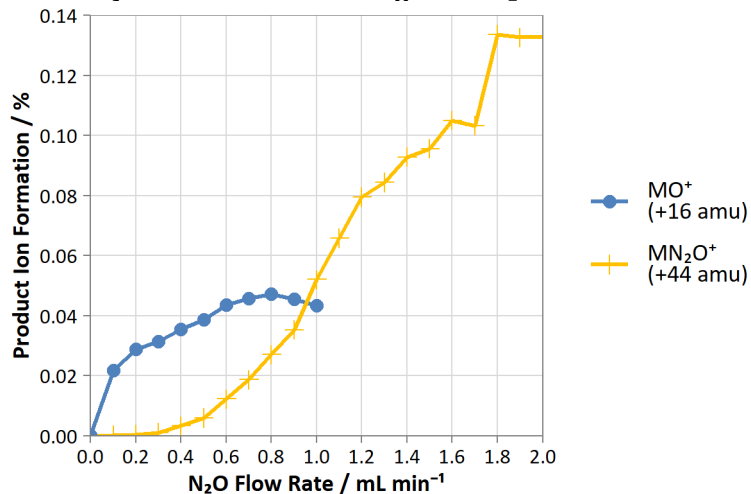

Major Product Ions of <sup>202</sup>Hg<sup>+</sup> with O<sub>2</sub> Reaction Gas

[NO ATOM TRANSFER REACTION OBSERVED]

## On-Mass Removal (as Interference) with N<sub>2</sub>O

Variation of <sup>202</sup>Hg<sup>16</sup>O<sup>+</sup> Interference with N<sub>2</sub>O Flow Rate  
(On-Mass: Q1 = 218, Q3 = 218)

[INSUFFICIENT OXIDE FORMATION OBSERVED]

Variation of <sup>202</sup>Hg<sup>2+</sup> Interference with N<sub>2</sub>O Flow Rate  
(On-Mass: Q1 = 101, Q3 = 101)

[INSUFFICIENT DOUBLY-CHARGED ION FORMATION OBSERVED]

## On-Mass with N<sub>2</sub>O and O<sub>2</sub>

On-Mass Profile of <sup>202</sup>Hg<sup>+</sup> with N<sub>2</sub>O and O<sub>2</sub>

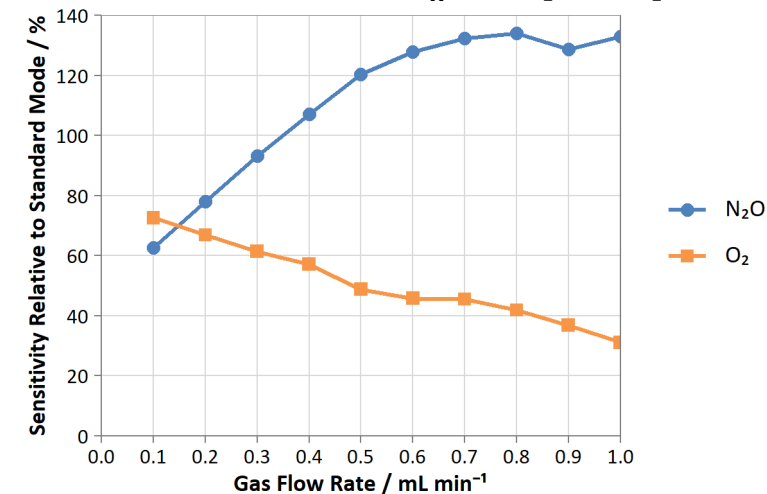

## Asymmetric Charge Transfer (with N<sub>2</sub>O)

[NO CHARGE TRANSFER REACTION OBSERVED]

# Thallium

Supplementary Information B to: Characterisation of gas cell reactions for 70+ elements using N<sub>2</sub>O for ICP tandem mass spectrometry measurements

Shaun T. Lancaster<sup>a\*</sup>, Thomas Prohaska<sup>ab</sup> and Johanna Irrgeher<sup>ab</sup>

<sup>a</sup>Department of General, Analytical and Physical Chemistry, Chair of General and Analytical Chemistry, Montanuniversität Leoben, Leoben, Austria.

<sup>b</sup>Department of Physics and Astronomy, University of Calgary, Calgary, Canada.



## Mass-Shift with N<sub>2</sub>O and O<sub>2</sub>

Major Product Ions of <sup>205</sup>Tl<sup>+</sup> with N<sub>2</sub>O Reaction Gas

[NO ATOM TRANSFER  
REACTION OBSERVED]

Major Product Ions of <sup>205</sup>Tl<sup>+</sup> with O<sub>2</sub> Reaction Gas

[NO ATOM TRANSFER  
REACTION OBSERVED]

## On-Mass with N<sub>2</sub>O and O<sub>2</sub>

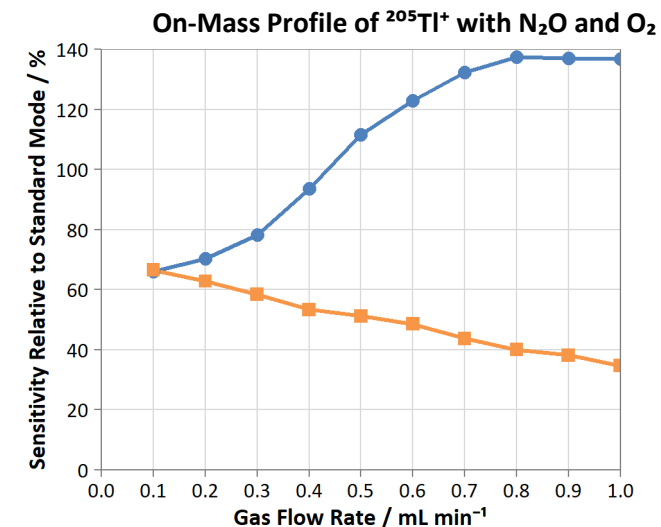

## On-Mass Removal (as Interference) with N<sub>2</sub>O

Variation of <sup>205</sup>Tl<sup>16</sup>O<sup>+</sup> Interference with  
N<sub>2</sub>O Flow Rate  
(On-Mass: Q1 = 221, Q3 = 221)

[INSUFFICIENT OXIDE  
FORMATION OBSERVED]

Variation of <sup>205</sup>Tl<sup>2+</sup> Interference with  
N<sub>2</sub>O Flow Rate  
(On-Mass: Q1 = 102.5, Q3 = 102.5)

[INSUFFICIENT DOUBLY-CHARGED  
ION FORMATION OBSERVED]

## Asymmetric Charge Transfer (with N<sub>2</sub>O)

[NO CHARGE TRANSFER  
REACTION OBSERVED]

# Lead

Supplementary Information B to: Characterisation of gas cell reactions for 70+ elements using N<sub>2</sub>O for ICP tandem mass spectrometry measurements  
Shaun T. Lancaster<sup>a\*</sup>, Thomas Prohaska<sup>ab</sup> and Johanna Irrgeher<sup>ab</sup>  
<sup>a</sup>Department of General, Analytical and Physical Chemistry, Chair of General and Analytical Chemistry, Montanuniversität Leoben, Leoben, Austria.  
<sup>b</sup>Department of Physics and Astronomy, University of Calgary, Calgary, Canada.



## Mass-Shift with N<sub>2</sub>O and O<sub>2</sub>

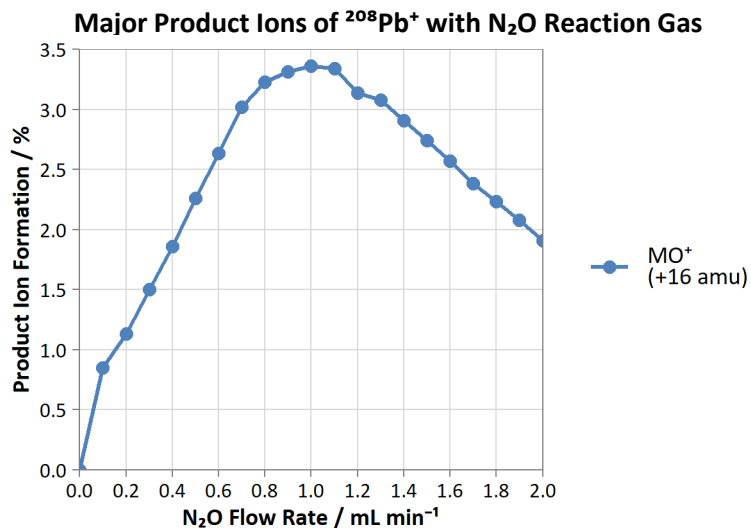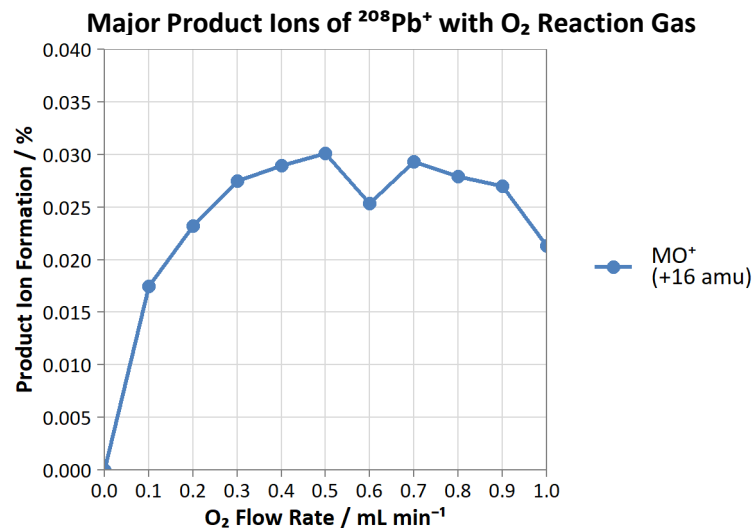

## On-Mass with N<sub>2</sub>O and O<sub>2</sub>

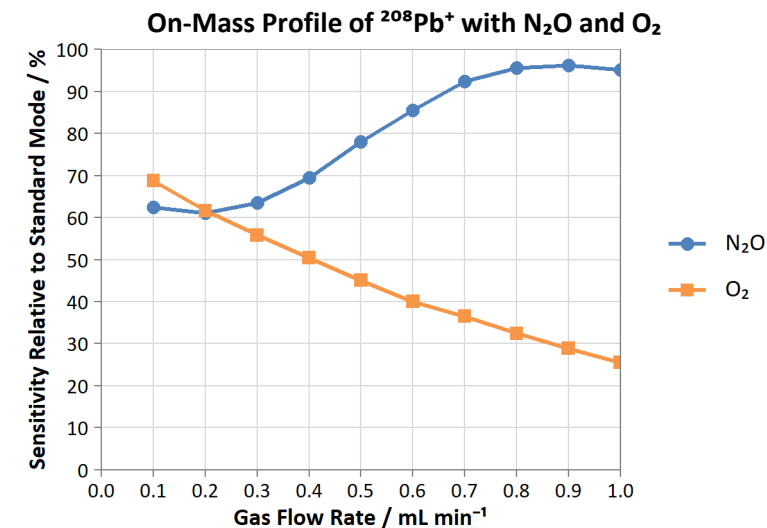

## On-Mass Removal (as Interference) with N<sub>2</sub>O

Variation of <sup>208</sup>Pb<sup>16</sup>O<sup>+</sup> Interference with N<sub>2</sub>O Flow Rate  
(On-Mass: Q1 = 224, Q3 = 224)

[INSUFFICIENT OXIDE FORMATION OBSERVED]

Variation of <sup>208</sup>Pb<sup>2+</sup> Interference with N<sub>2</sub>O Flow Rate  
(On-Mass: Q1 = 104, Q3 = 104)

[INSUFFICIENT DOUBLY-CHARGED ION FORMATION OBSERVED]

## Asymmetric Charge Transfer (with N<sub>2</sub>O)

[NO CHARGE TRANSFER REACTION OBSERVED]



## Mass-Shift with N<sub>2</sub>O and O<sub>2</sub>

Major Product Ions of <sup>209</sup>Bi<sup>+</sup> with N<sub>2</sub>O Reaction Gas

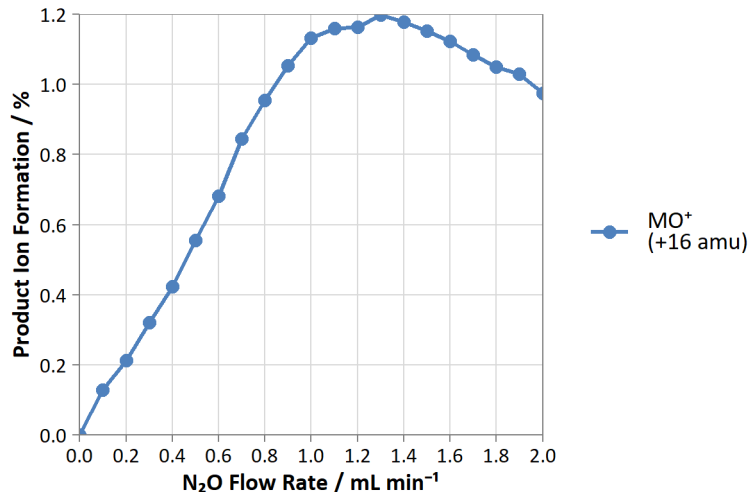

Major Product Ions of <sup>209</sup>Bi<sup>+</sup> with O<sub>2</sub> Reaction Gas

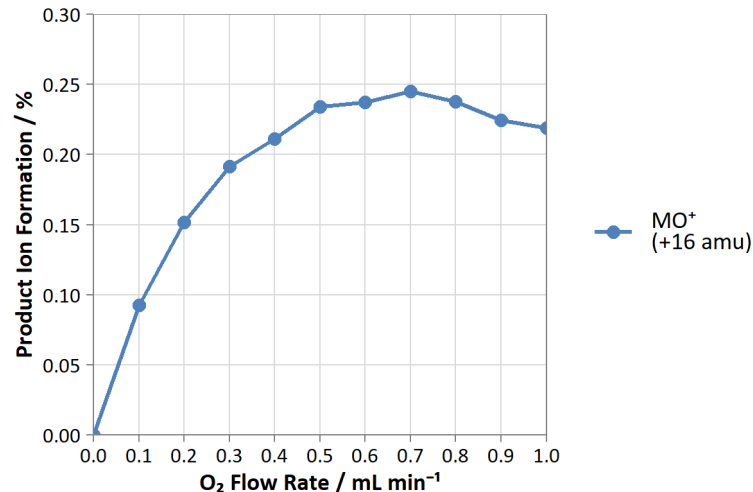

## On-Mass with N<sub>2</sub>O and O<sub>2</sub>

On-Mass Profile of <sup>209</sup>Bi<sup>+</sup> with N<sub>2</sub>O and O<sub>2</sub>

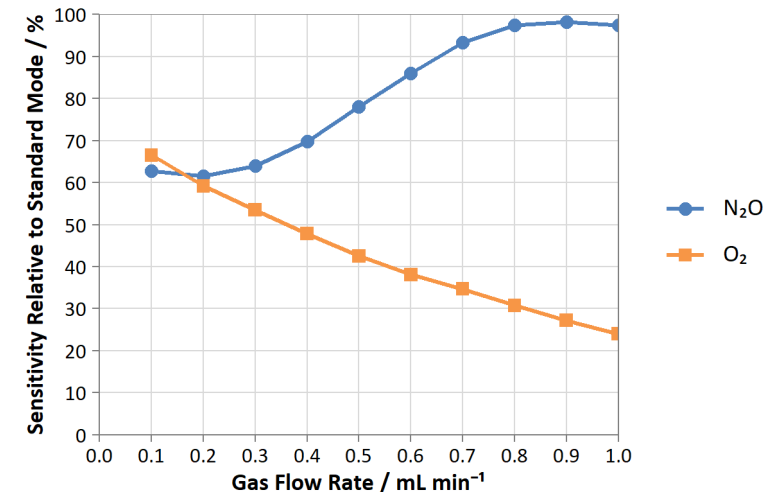

## On-Mass Removal (as Interference) with N<sub>2</sub>O

Variation of <sup>209</sup>Bi<sup>16</sup>O<sup>+</sup> Interference with N<sub>2</sub>O Flow Rate  
(On-Mass: Q1 = 225, Q3 = 225)

[INSUFFICIENT OXIDE FORMATION OBSERVED]

Variation of <sup>209</sup>Bi<sup>2+</sup> Interference with N<sub>2</sub>O Flow Rate  
(On-Mass: Q1 = 104.5, Q3 = 104.5)

[INSUFFICIENT DOUBLY-CHARGED ION FORMATION OBSERVED]

## Asymmetric Charge Transfer (with N<sub>2</sub>O)

[NO CHARGE TRANSFER REACTION OBSERVED]



# Thorium

Supplementary Information B to: Characterisation of gas cell reactions for 70+ elements using N<sub>2</sub>O for ICP tandem mass spectrometry measurements  
Shaun T. Lancaster<sup>a\*</sup>, Thomas Prohaska<sup>ab</sup> and Johanna Irrgeher<sup>ab</sup>  
<sup>a</sup>Department of General, Analytical and Physical Chemistry, Chair of General and Analytical Chemistry, Montanuniversität Leoben, Leoben, Austria.  
<sup>b</sup>Department of Physics and Astronomy, University of Calgary, Calgary, Canada.



## Mass-Shift with N<sub>2</sub>O and O<sub>2</sub>

Major Product Ions of <sup>232</sup>Th<sup>+</sup> with N<sub>2</sub>O Reaction Gas

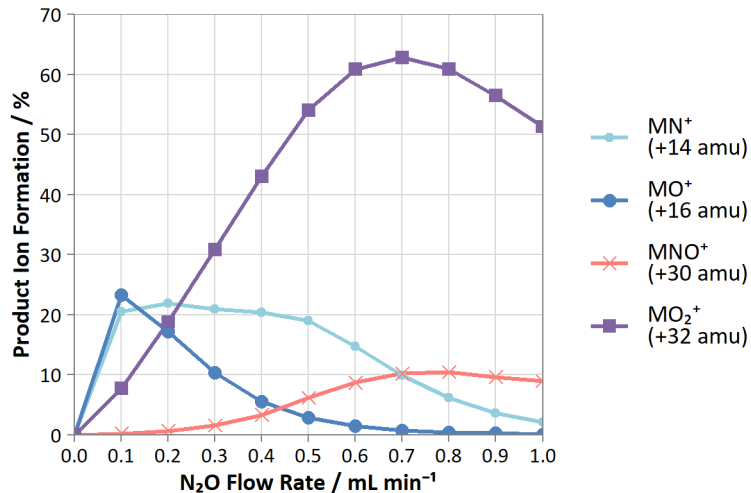

Major Product Ions of <sup>232</sup>Th<sup>+</sup> with O<sub>2</sub> Reaction Gas

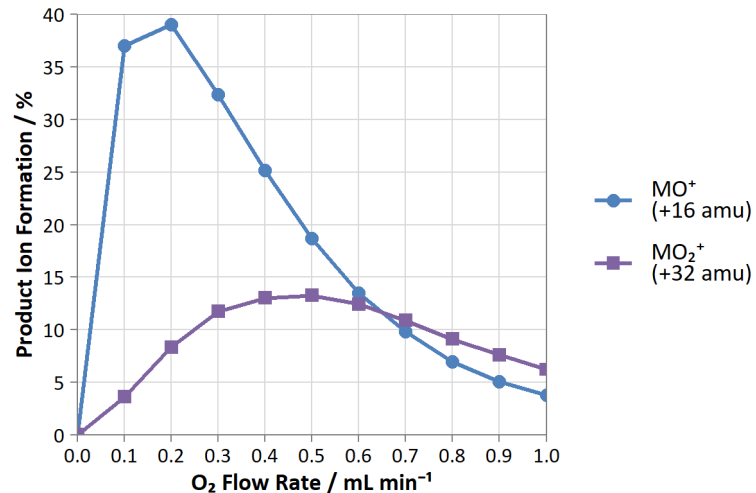

## On-Mass with N<sub>2</sub>O and O<sub>2</sub>

On-Mass Profile of <sup>232</sup>Th<sup>+</sup> with N<sub>2</sub>O and O<sub>2</sub>

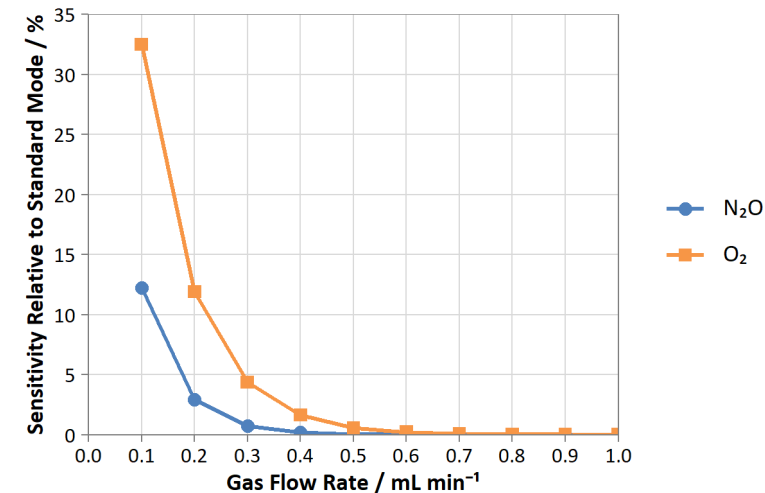

## On-Mass Removal (as Interference) with N<sub>2</sub>O

Variation of <sup>232</sup>Th<sup>16</sup>O<sup>+</sup> Interference with N<sub>2</sub>O Flow Rate  
(On-Mass: Q1 = 248, Q3 = 248)

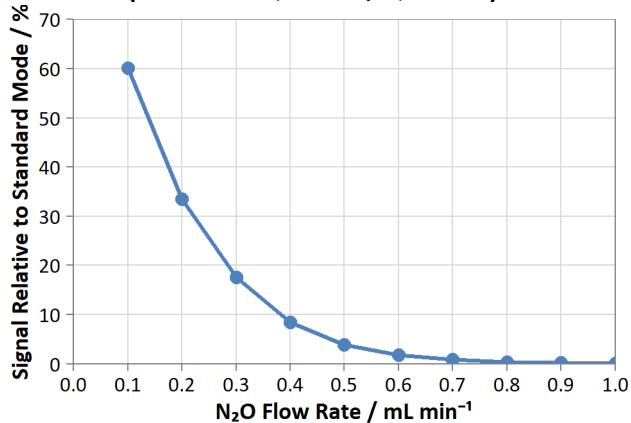

Variation of <sup>232</sup>Th<sup>2+</sup> Interference with N<sub>2</sub>O Flow Rate  
(On-Mass: Q1 = 116, Q3 = 116)

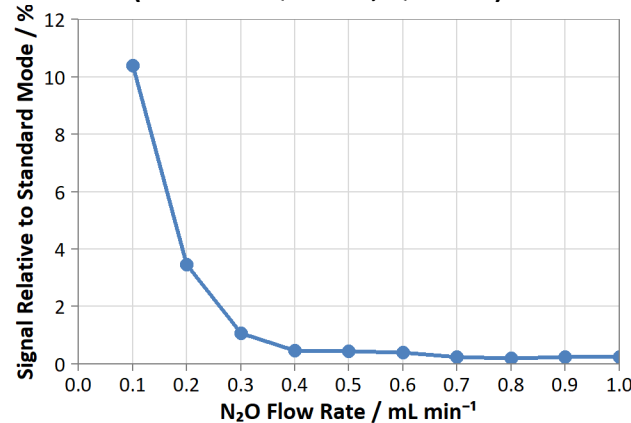

## Asymmetric Charge Transfer (with N<sub>2</sub>O)

[NO CHARGE TRANSFER REACTION OBSERVED]



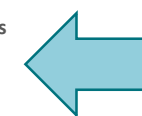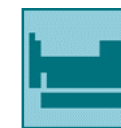

## Mass-Shift with N<sub>2</sub>O and O<sub>2</sub>

Major Product Ions of <sup>238</sup>U<sup>+</sup> with N<sub>2</sub>O Reaction Gas

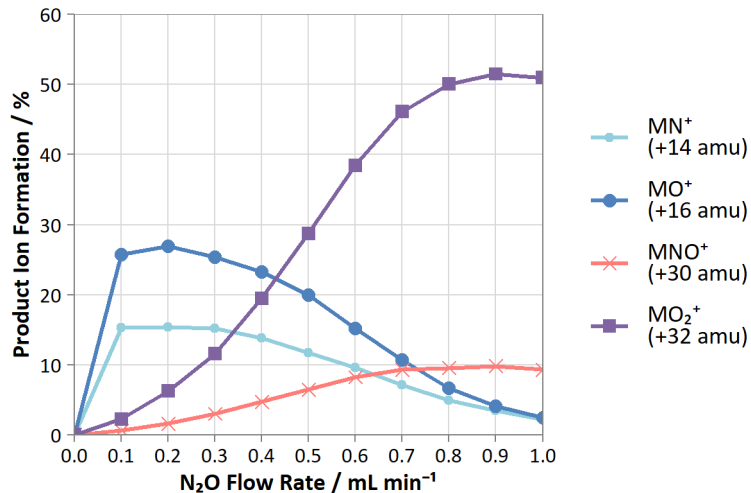

Major Product Ions of <sup>238</sup>U<sup>+</sup> with O<sub>2</sub> Reaction Gas

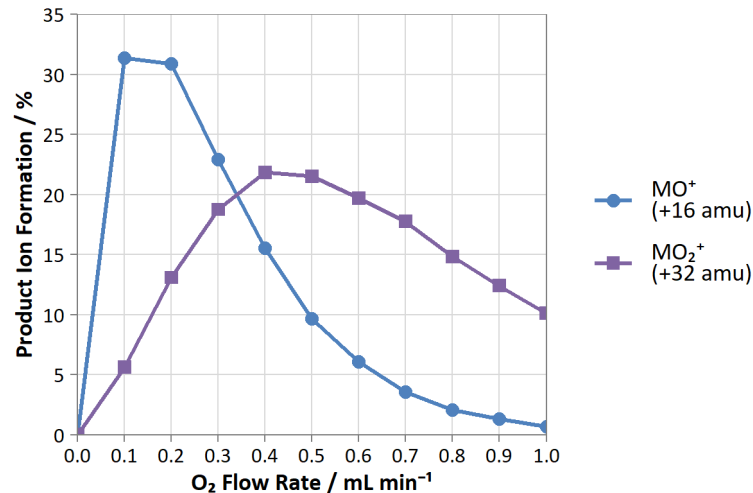

## On-Mass with N<sub>2</sub>O and O<sub>2</sub>

On-Mass Profile of <sup>238</sup>U<sup>+</sup> with N<sub>2</sub>O and O<sub>2</sub>

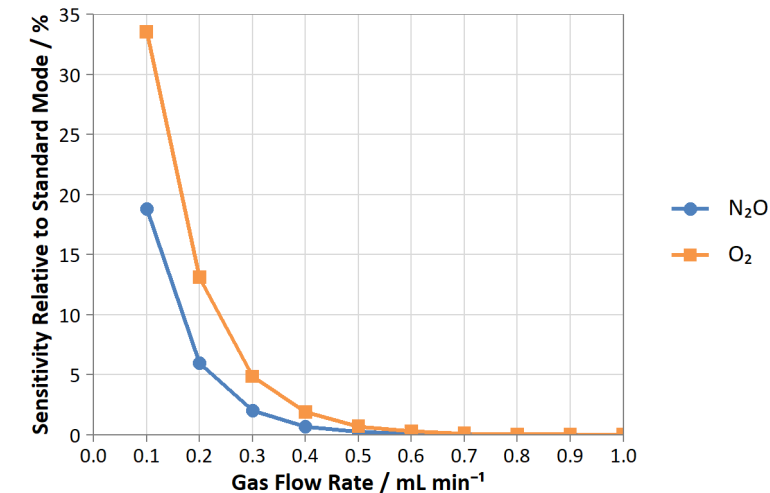

## On-Mass Removal (as Interference) with N<sub>2</sub>O

Variation of <sup>238</sup>U<sup>16</sup>O<sup>+</sup> Interference with N<sub>2</sub>O Flow Rate (On-Mass: Q1 = 254, Q3 = 254)

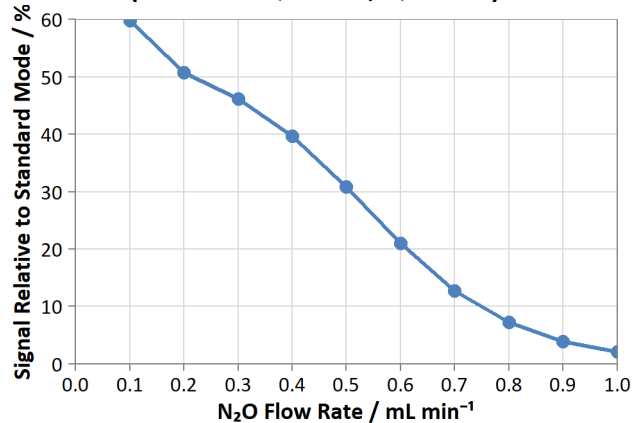

Variation of <sup>238</sup>U<sup>2+</sup> Interference with N<sub>2</sub>O Flow Rate (On-Mass: Q1 = 119, Q3 = 119)

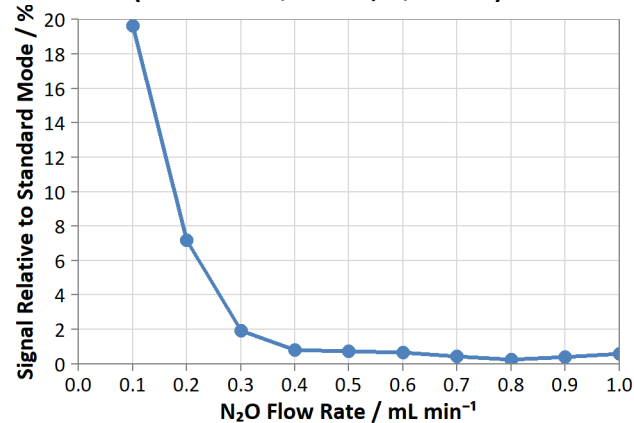

## Asymmetric Charge Transfer (with N<sub>2</sub>O)

[NO CHARGE TRANSFER REACTION OBSERVED]
